# Supplementary material for: Synthesis of pyrimidine-fused skeletons through copper-catalyzed consecutive Sonogashira coupling and aminocyclization
Source: Royal Society of Chemistry journal article supplement (doi:10.1039/d3ob01248d), 2023-01-01
Supplement: d3ob01248d1.pdf [file d3ob01248d1.pdf]

*Supporting Information*

# Synthesis of Pyrimidine-Fused Skeletons through Copper-Catalyzed Consecutive Sonogashira Coupling and Aminocyclization

Heng He,<sup>†</sup> Jian-Quan Liu,<sup>†,\*</sup> Xiang-Shan Wang,<sup>†,\*</sup>

<sup>†</sup> School of Chemistry and Materials Science, Jiangsu Key Laboratory of Green Synthesis for Functional Materials Jiangsu Normal University, Xuzhou, Jiangsu 221116, China.

\* E-mail: liujq316@jsnu.edu.cn (J.-Q.L.); xswang@jsnu.edu.cn (X.-S.W)

## Table of Contents

|                                                                                                                                                    |     |
|----------------------------------------------------------------------------------------------------------------------------------------------------|-----|
| I. General information .....                                                                                                                       | S1  |
| II. Crystallography .....                                                                                                                          | S1  |
| III. Synthesis and analytical data of compounds 1, 3, 4, 5, 6 and 7 .....                                                                          | S5  |
| 2-(2-bromo-5-fluorophenyl)-1 <i>H</i> -perimidine ( <b>1d</b> ) .....                                                                              | S5  |
| 2-(2-bromo-6-fluorophenyl)-1 <i>H</i> -perimidine ( <b>1g</b> ).....                                                                               | S5  |
| 2-(6-bromobenzo[ <i>d</i> ][1,3]dioxol-5-yl)-1 <i>H</i> -perimidine ( <b>1h</b> ).....                                                             | S6  |
| 2-(1-bromonaphthalen-2-yl)-1 <i>H</i> -perimidine ( <b>1i</b> ).....                                                                               | S6  |
| 2-(2-bromopyridin-3-yl)-1 <i>H</i> -perimidine ( <b>1j</b> ) .....                                                                                 | S6  |
| 5-(2-bromo-4-fluorophenyl)-1-methyl-3-propyl-1,6-dihydro-7 <i>H</i> -pyrazolo[4,3- <i>d</i> ]pyrimidin-7-one ( <b>4b</b> ) .....                   | S7  |
| 5-(2-bromo-4-chlorophenyl)-1-methyl-3-propyl-1,6-dihydro-7 <i>H</i> -pyrazolo[4,3- <i>d</i> ]pyrimidin-7-one ( <b>4c</b> ).....                    | S8  |
| 5-(2-bromo-4-methylphenyl)-1-methyl-3-propyl-1,6-dihydro-7 <i>H</i> -pyrazolo[4,3- <i>d</i> ]pyrimidin-7-one ( <b>4d</b> ) .....                   | S8  |
| 5-(2-bromo-5-fluorophenyl)-1-methyl-3-propyl-1,6-dihydro-7 <i>H</i> -pyrazolo[4,3- <i>d</i> ]pyrimidin-7-one ( <b>4e</b> ) .....                   | S8  |
| 5-(2-bromo-5-chlorophenyl)-1-methyl-3-propyl-1,6-dihydro-7 <i>H</i> -pyrazolo[4,3- <i>d</i> ]pyrimidin-7-one ( <b>4f</b> ) .....                   | S9  |
| 5-(2-bromo-5-methoxyphenyl)-1-methyl-3-propyl-1,6-dihydro-7 <i>H</i> -pyrazolo[4,3- <i>d</i> ]pyrimidin-7-one ( <b>4g</b> ) .....                  | S9  |
| 5-(2-bromo-6-fluorophenyl)-1-methyl-3-propyl-1,6-dihydro-7 <i>H</i> -pyrazolo[4,3- <i>d</i> ]pyrimidin-7-one ( <b>4h</b> ) .....                   | S9  |
| 5-(1-bromonaphthalen-2-yl)-1-methyl-3-propyl-1,6-dihydro-7 <i>H</i> -pyrazolo[4,3- <i>d</i> ]pyrimidin-7-one ( <b>4i</b> ) .....                   | S10 |
| 5-(6-bromobenzo[ <i>d</i> ][1,3]dioxol-5-yl)-1-methyl-3-propyl-1,6-dihydro-7 <i>H</i> -pyrazolo[4,3- <i>d</i> ]pyrimidin-7-one ( <b>4j</b> ) ..... | S10 |
| 5-(2-bromo-4,5-dimethoxyphenyl)-1-methyl-3-propyl-1,6-dihydro-7 <i>H</i> -pyrazolo[4,3- <i>d</i> ]pyrimidin-7-one ( <b>4k</b> ) .....              | S11 |
| 2-(2-bromo-5-methoxyphenyl)-5,6,7,8-tetrahydrobenzo[4,5]thieno[2,3- <i>d</i> ]pyrimidin-4(3 <i>H</i> )-one ( <b>7</b> ) .....                      | S11 |
| ( <i>E</i> )-12-benzylidene-12 <i>H</i> -isoindolo[2,1- <i>a</i> ]perimidine ( <b>3a</b> ).....                                                    | S12 |

|                                                                                                                                                               |     |
|---------------------------------------------------------------------------------------------------------------------------------------------------------------|-----|
| ( <i>E</i> )-12-benzylidene-10-fluoro-12 <i>H</i> -isoindolo[2,1- <i>a</i> ]perimidine ( <b>3b</b> ) .....                                                    | S12 |
| ( <i>E</i> )-12-benzylidene-10-chloro-12 <i>H</i> -isoindolo[2,1- <i>a</i> ]perimidine ( <b>3c</b> ) .....                                                    | S13 |
| ( <i>E</i> )-12-benzylidene-9-fluoro-12 <i>H</i> -isoindolo[2,1- <i>a</i> ]perimidine ( <b>3d</b> ) .....                                                     | S14 |
| ( <i>E</i> )-12-benzylidene-9-chloro-12 <i>H</i> -isoindolo[2,1- <i>a</i> ]perimidine ( <b>3e</b> ) .....                                                     | S14 |
| ( <i>E</i> )-12-benzylidene-9-methoxy-12 <i>H</i> -isoindolo[2,1- <i>a</i> ]perimidine ( <b>3f</b> ) .....                                                    | S15 |
| ( <i>E</i> )-12-benzylidene-8-fluoro-12 <i>H</i> -isoindolo[2,1- <i>a</i> ]perimidine ( <b>3g</b> ) .....                                                     | S16 |
| ( <i>E</i> )-13-benzylidene-13 <i>H</i> -[1,3]dioxolo[4',5':5,6]isoindolo[2,1- <i>a</i> ]perimidine ( <b>3h</b> ) .....                                       | S16 |
| ( <i>E</i> )-14-benzylidene-14 <i>H</i> -benzo[5,6]isoindolo[2,1- <i>a</i> ]perimidine ( <b>3i</b> ) .....                                                    | S17 |
| ( <i>E</i> )-12-benzylidene-12 <i>H</i> -pyrido[3',2':3,4]pyrrolo[1,2- <i>a</i> ]perimidine ( <b>3j</b> ) .....                                               | S18 |
| ( <i>E</i> )-12-(naphthalen-1-ylmethylene)-12 <i>H</i> -isoindolo[2,1- <i>a</i> ]perimidine ( <b>3k</b> ) .....                                               | S18 |
| ( <i>E</i> )-12-(2-methoxybenzylidene)-12 <i>H</i> -isoindolo[2,1- <i>a</i> ]perimidine ( <b>3l</b> ) .....                                                   | S19 |
| ( <i>E</i> )-12-(2-fluorobenzylidene)-12 <i>H</i> -isoindolo[2,1- <i>a</i> ]perimidine ( <b>3m</b> ) .....                                                    | S20 |
| ( <i>E</i> )-12-(2-chlorobenzylidene)-12 <i>H</i> -isoindolo[2,1- <i>a</i> ]perimidine ( <b>3n</b> ) .....                                                    | S20 |
| ( <i>E</i> )-12-(2-methylbenzylidene)-12 <i>H</i> -isoindolo[2,1- <i>a</i> ]perimidine ( <b>3o</b> ) .....                                                    | S21 |
| ( <i>E</i> )-12-(3-methoxybenzylidene)-12 <i>H</i> -isoindolo[2,1- <i>a</i> ]perimidine ( <b>3p</b> ) .....                                                   | S22 |
| ( <i>E</i> )-12-(3-fluorobenzylidene)-12 <i>H</i> -isoindolo[2,1- <i>a</i> ]perimidine ( <b>3q</b> ) .....                                                    | S23 |
| ( <i>E</i> )-12-(3-chlorobenzylidene)-12 <i>H</i> -isoindolo[2,1- <i>a</i> ]perimidine ( <b>3r</b> ) .....                                                    | S23 |
| ( <i>E</i> )-12-(3-methylbenzylidene)-12 <i>H</i> -isoindolo[2,1- <i>a</i> ]perimidine ( <b>3s</b> ) .....                                                    | S24 |
| ( <i>E</i> )-12-(3-nitrobenzylidene)-12 <i>H</i> -isoindolo[2,1- <i>a</i> ]perimidine ( <b>3t</b> ) .....                                                     | S25 |
| ( <i>E</i> )-12-(4-bromobenzylidene)-12 <i>H</i> -isoindolo[2,1- <i>a</i> ]perimidine ( <b>3u</b> ) .....                                                     | S25 |
| ( <i>E</i> )-12-(4-chlorobenzylidene)-12 <i>H</i> -isoindolo[2,1- <i>a</i> ]perimidine ( <b>3v</b> ) .....                                                    | S26 |
| ( <i>E</i> )-9-benzylidene-1-methyl-3-propyl-1,9-dihydro-11 <i>H</i> -pyrazolo[4',3':4,5]pyrimido[2,1- <i>a</i> ]isoindol-11-one ( <b>5a</b> ) .....          | S27 |
| ( <i>E</i> )-9-benzylidene-7-fluoro-1-methyl-3-propyl-1,9-dihydro-11 <i>H</i> -pyrazolo[4',3':4,5]pyrimido[2,1- <i>a</i> ]isoindol-11-one ( <b>5b</b> ) ..... | S27 |
| ( <i>E</i> )-9-benzylidene-7-chloro-1-methyl-3-propyl-1,9-dihydro-11 <i>H</i> -pyrazolo[4',3':4,5]pyrimido[2,1- <i>a</i> ]isoindol-11-one ( <b>5c</b> ) ..... | S28 |
| ( <i>E</i> )-9-benzylidene-1,7-dimethyl-3-propyl-1,9-dihydro-11 <i>H</i> -pyrazolo[4',3':4,5]pyrimido[2,1- <i>a</i> ]isoindol-11-one ( <b>5d</b> ) .....      | S29 |
| ( <i>E</i> )-9-benzylidene-6-fluoro-1-methyl-3-propyl-1,9-dihydro-11 <i>H</i> -pyrazolo[4',3':4,5]pyrimido[2,1- <i>a</i> ]isoindol-11-one ( <b>5e</b> ) ..... | S29 |

|                                                                                                                                                                                   |     |
|-----------------------------------------------------------------------------------------------------------------------------------------------------------------------------------|-----|
| ( <i>E</i> )-9-benzylidene-6-chloro-1-methyl-3-propyl-1,9-dihydro-11 <i>H</i> -pyrazolo[4',3':4,5]pyrimido[2,1- <i>a</i> ]isoindol-11-one ( <b>5f</b> ).....                      | S30 |
| ( <i>E</i> )-9-benzylidene-6-methoxy-1-methyl-3-propyl-1,9-dihydro-11 <i>H</i> -pyrazolo[4',3':4,5]pyrimido[2,1- <i>a</i> ]isoindol-11-one ( <b>5g</b> ) .....                    | S31 |
| ( <i>E</i> )-9-benzylidene-5-fluoro-1-methyl-3-propyl-1,9-dihydro-11 <i>H</i> -pyrazolo[4',3':4,5]pyrimido[2,1- <i>a</i> ]isoindol-11-one ( <b>5h</b> ) .....                     | S32 |
| ( <i>E</i> )-13-benzylidene-10-methyl-8-propyl-10,13-dihydro-11 <i>H</i> -benzo[ <i>e</i> ]pyrazolo[4',3':4,5]pyrimido[2,1- <i>a</i> ]isoindol-11-one ( <b>5i</b> ) .....         | S32 |
| ( <i>E</i> )-10-benzylidene-1-methyl-3-propyl-1,10-dihydro-12 <i>H</i> -[1,3]dioxolo[4,5- <i>f</i> ]pyrazolo[4',3':4,5]pyrimido[2,1- <i>a</i> ]isoindol-12-one ( <b>5j</b> )..... | S33 |
| ( <i>E</i> )-9-benzylidene-6,7-dimethoxy-1-methyl-3-propyl-1,9-dihydro-11 <i>H</i> -pyrazolo[4',3':4,5]pyrimido[2,1- <i>a</i> ]isoindol-11-one ( <b>5k</b> ) .....                | S34 |
| ( <i>E</i> )-6,7-dimethoxy-9-(2-methoxybenzylidene)-1-methyl-3-propyl-1,9-dihydro-11 <i>H</i> -pyrazolo[4',3':4,5]pyrimido[2,1- <i>a</i> ]isoindol-11-one ( <b>5l</b> ) .....     | S35 |
| ( <i>E</i> )-1-methyl-9-(naphthalen-2-ylmethylene)-3-propyl-1,9-dihydro-11 <i>H</i> -pyrazolo[4',3':4,5]pyrimido[2,1- <i>a</i> ]isoindol-11-one ( <b>5m</b> ) .....               | S36 |
| ( <i>E</i> )-1-methyl-3-propyl-9-(thiophen-2-ylmethylene)-1,9-dihydro-11 <i>H</i> -pyrazolo[4',3':4,5]pyrimido[2,1- <i>a</i> ]isoindol-11-one ( <b>5n</b> ) .....                 | S36 |
| ( <i>E</i> )-9-(4-fluorobenzylidene)-1-methyl-3-propyl-1,9-dihydro-11 <i>H</i> -pyrazolo[4',3':4,5]pyrimido[2,1- <i>a</i> ]isoindol-11-one ( <b>5o</b> ) .....                    | S37 |
| ( <i>E</i> )-9-(4-chlorobenzylidene)-1-methyl-3-propyl-1,9-dihydro-11 <i>H</i> -pyrazolo[4',3':4,5]pyrimido[2,1- <i>a</i> ]isoindol-11-one ( <b>5p</b> ) .....                    | S38 |
| ( <i>E</i> )-1-methyl-9-(4-methylbenzylidene)-3-propyl-1,9-dihydro-11 <i>H</i> -pyrazolo[4',3':4,5]pyrimido[2,1- <i>a</i> ]isoindol-11-one ( <b>5q</b> ) .....                    | S38 |
| ( <i>E</i> )-9-(4-methoxybenzylidene)-1-methyl-3-propyl-1,9-dihydro-11 <i>H</i> -pyrazolo[4',3':4,5]pyrimido[2,1- <i>a</i> ]isoindol-11-one ( <b>5r</b> ).....                    | S39 |
| ( <i>E</i> )-9-(4-ethylbenzylidene)-1-methyl-3-propyl-1,9-dihydro-11 <i>H</i> -pyrazolo[4',3':4,5]pyrimido[2,1- <i>a</i> ]isoindol-11-one ( <b>5s</b> ) .....                     | S40 |
| ( <i>E</i> )-9-(4-ethoxybenzylidene)-1-methyl-3-propyl-1,9-dihydro-11 <i>H</i> -pyrazolo[4',3':4,5]pyrimido[2,1- <i>a</i> ]isoindol-11-one ( <b>5t</b> ).....                     | S40 |
| ( <i>E</i> )-1-methyl-3-propyl-9-(4-propylbenzylidene)-1,9-dihydro-11 <i>H</i> -pyrazolo[4',3':4,5]pyrimido[2,1- <i>a</i> ]isoindol-11-one ( <b>5u</b> ) .....                    | S41 |

|                                                                                                                                                                  |     |
|------------------------------------------------------------------------------------------------------------------------------------------------------------------|-----|
| ( <i>E</i> )-9-(4-butylbenzylidene)-1-methyl-3-propyl-1,9-dihydro-11 <i>H</i> -pyrazolo[4',3':4,5]pyrimido[2,1- <i>a</i> ]isoindol-11-one ( <b>5v</b> ) .....    | S42 |
| ( <i>E</i> )-1-methyl-9-(4-pentylbenzylidene)-3-propyl-1,9-dihydro-11 <i>H</i> -pyrazolo[4',3':4,5]pyrimido[2,1- <i>a</i> ]isoindol-11-one ( <b>5w</b> ) .....   | S42 |
| ( <i>E</i> )-9-(2-fluorobenzylidene)-1-methyl-3-propyl-1,9-dihydro-11 <i>H</i> -pyrazolo[4',3':4,5]pyrimido[2,1- <i>a</i> ]isoindol-11-one ( <b>5x</b> ) .....   | S43 |
| ( <i>E</i> )-9-(2-chlorobenzylidene)-1-methyl-3-propyl-1,9-dihydro-11 <i>H</i> -pyrazolo[4',3':4,5]pyrimido[2,1- <i>a</i> ]isoindol-11-one ( <b>5y</b> ) .....   | S44 |
| ( <i>E</i> )-1-methyl-9-(2-methylbenzylidene)-3-propyl-1,9-dihydro-11 <i>H</i> -pyrazolo[4',3':4,5]pyrimido[2,1- <i>a</i> ]isoindol-11-one ( <b>5z</b> ) .....   | S45 |
| ( <i>E</i> )-9-(2-methoxybenzylidene)-1-methyl-3-propyl-1,9-dihydro-11 <i>H</i> -pyrazolo[4',3':4,5]pyrimido[2,1- <i>a</i> ]isoindol-11-one ( <b>5aa</b> ) ..... | S45 |
| ( <i>E</i> )-9-(3-fluorobenzylidene)-1-methyl-3-propyl-1,9-dihydro-11 <i>H</i> -pyrazolo[4',3':4,5]pyrimido[2,1- <i>a</i> ]isoindol-11-one ( <b>5ab</b> ) .....  | S46 |
| ( <i>E</i> )-9-(3-chlorobenzylidene)-1-methyl-3-propyl-1,9-dihydro-11 <i>H</i> -pyrazolo[4',3':4,5]pyrimido[2,1- <i>a</i> ]isoindol-11-one ( <b>5ac</b> ) .....  | S47 |
| ( <i>E</i> )-1-methyl-9-(3-methylbenzylidene)-3-propyl-1,9-dihydro-11 <i>H</i> -pyrazolo[4',3':4,5]pyrimido[2,1- <i>a</i> ]isoindol-11-one ( <b>5ad</b> ) .....  | S47 |
| ( <i>E</i> )-9-(3-methoxybenzylidene)-1-methyl-3-propyl-1,9-dihydro-11 <i>H</i> -pyrazolo[4',3':4,5]pyrimido[2,1- <i>a</i> ]isoindol-11-one ( <b>5ae</b> ) ..... | S48 |
| ( <i>E</i> )-11-benzylidene-8-methoxy-2,3,4,11-tetrahydrobenzo[4',5']thieno[2',3':4,5]pyrimido[2,1- <i>a</i> ]isoindol-13(1 <i>H</i> )-one ( <b>5af</b> ) .....  | S49 |
| ( <i>Z</i> )-9-benzylidene-1-methyl-3-propyl-1,9-dihydro-11 <i>H</i> -pyrazolo[4',3':4,5]pyrimido[2,1- <i>a</i> ]isoindol-11-one ( <b>6a</b> ) .....             | S50 |
| ( <i>Z</i> )-9-benzylidene-7-fluoro-1-methyl-3-propyl-1,9-dihydro-11 <i>H</i> -pyrazolo[4',3':4,5]pyrimido[2,1- <i>a</i> ]isoindol-11-one ( <b>6b</b> ) .....    | S50 |
| ( <i>Z</i> )-9-benzylidene-7-chloro-1-methyl-3-propyl-1,9-dihydro-11 <i>H</i> -pyrazolo[4',3':4,5]pyrimido[2,1- <i>a</i> ]isoindol-11-one ( <b>6c</b> ) .....    | S51 |
| ( <i>Z</i> )-9-benzylidene-1,7-dimethyl-3-propyl-1,9-dihydro-11 <i>H</i> -pyrazolo[4',3':4,5]pyrimido[2,1- <i>a</i> ]isoindol-11-one ( <b>6d</b> ) .....         | S52 |
| ( <i>Z</i> )-9-benzylidene-6-fluoro-1-methyl-3-propyl-1,9-dihydro-11 <i>H</i> -pyrazolo[4',3':4,5]pyrimido[2,1- <i>a</i> ]isoindol-11-one ( <b>6e</b> ) .....    | S52 |
| ( <i>Z</i> )-9-benzylidene-6-chloro-1-methyl-3-propyl-1,9-dihydro-11 <i>H</i> -pyrazolo[4',3':4,5]pyrimido[2,1- <i>a</i> ]isoindol-11-one ( <b>6f</b> ) .....    | S53 |

|                                                                                                                                                                  |     |
|------------------------------------------------------------------------------------------------------------------------------------------------------------------|-----|
| (Z)-9-benzylidene-6-methoxy-1-methyl-3-propyl-1,9-dihydro-11H-pyrazolo[4',3':4,5]pyrimido[2,1- <i>a</i> ]isoindol-11-one ( <b>6g</b> ) .....                     | S54 |
| (Z)-9-benzylidene-5-fluoro-1-methyl-3-propyl-1,9-dihydro-11H-pyrazolo[4',3':4,5]pyrimido[2,1- <i>a</i> ]isoindol-11-one ( <b>6h</b> ) .....                      | S55 |
| (Z)-11-benzylidene-1-methyl-3-propyl-1,11-dihydro-13H-benzo[ <i>f</i> ]pyrazolo[4',3':4,5]pyrimido[2,1- <i>a</i> ]isoindol-13-one ( <b>6i</b> ) .....            | S56 |
| (Z)-10-benzylidene-1-methyl-3-propyl-1,10-dihydro-12H-[1,3]dioxolo[4,5- <i>f</i> ]pyrazolo[4',3':4,5]pyrimido[2,1- <i>a</i> ]isoindol-12-one ( <b>6j</b> ) ..... | S56 |
| (Z)-9-benzylidene-6,7-dimethoxy-1-methyl-3-propyl-1,9-dihydro-11H-pyrazolo[4',3':4,5]pyrimido[2,1- <i>a</i> ]isoindol-11-one ( <b>6k</b> ) .....                 | S57 |
| (Z)-6,7-dimethoxy-9-(2-methoxybenzylidene)-1-methyl-3-propyl-1,9-dihydro-11H-pyrazolo[4',3':4,5]pyrimido[2,1- <i>a</i> ]isoindol-11-one ( <b>6l</b> ) .....      | S58 |
| (Z)-1-methyl-9-(naphthalen-2-ylmethylene)-3-propyl-1,9-dihydro-11H-pyrazolo[4',3':4,5]pyrimido[2,1- <i>a</i> ]isoindol-11-one ( <b>6m</b> ) .....                | S59 |
| (Z)-1-methyl-3-propyl-9-(thiophen-2-ylmethylene)-1,9-dihydro-11H-pyrazolo[4',3':4,5]pyrimido[2,1- <i>a</i> ]isoindol-11-one ( <b>6n</b> ) .....                  | S59 |
| (Z)-9-(4-fluorobenzylidene)-1-methyl-3-propyl-1,9-dihydro-11H-pyrazolo[4',3':4,5]pyrimido[2,1- <i>a</i> ]isoindol-11-one ( <b>6o</b> ) .....                     | S60 |
| (Z)-9-(4-chlorobenzylidene)-1-methyl-3-propyl-1,9-dihydro-11H-pyrazolo[4',3':4,5]pyrimido[2,1- <i>a</i> ]isoindol-11-one ( <b>6p</b> ) .....                     | S61 |
| (Z)-1-methyl-9-(4-methylbenzylidene)-3-propyl-1,9-dihydro-11H-pyrazolo[4',3':4,5]pyrimido[2,1- <i>a</i> ]isoindol-11-one ( <b>6q</b> ) .....                     | S62 |
| (Z)-9-(4-methoxybenzylidene)-1-methyl-3-propyl-1,9-dihydro-11H-pyrazolo[4',3':4,5]pyrimido[2,1- <i>a</i> ]isoindol-11-one ( <b>6r</b> ) .....                    | S62 |
| (Z)-9-(4-ethylbenzylidene)-1-methyl-3-propyl-1,9-dihydro-11H-pyrazolo[4',3':4,5]pyrimido[2,1- <i>a</i> ]isoindol-11-one ( <b>6s</b> ) .....                      | S63 |
| (Z)-9-(4-ethoxybenzylidene)-1-methyl-3-propyl-1,9-dihydro-11H-pyrazolo[4',3':4,5]pyrimido[2,1- <i>a</i> ]isoindol-11-one ( <b>6t</b> ) .....                     | S64 |
| (Z)-1-methyl-3-propyl-9-(4-propylbenzylidene)-1,9-dihydro-11H-pyrazolo[4',3':4,5]pyrimido[2,1- <i>a</i> ]isoindol-11-one ( <b>6u</b> ) .....                     | S65 |
| (Z)-9-(4-butylbenzylidene)-1-methyl-3-propyl-1,9-dihydro-11H-pyrazolo[4',3':4,5]pyrimido[2,1- <i>a</i> ]isoindol-11-one ( <b>6v</b> ) .....                      | S66 |
| (Z)-1-methyl-9-(4-pentylbenzylidene)-3-propyl-1,9-dihydro-11H-pyrazolo[4',3':4,5]pyrimido[2,1- <i>a</i> ]isoindol-11-one ( <b>6w</b> ) .....                     | S66 |

|                                                                                                                                                         |            |
|---------------------------------------------------------------------------------------------------------------------------------------------------------|------------|
| (Z)-9-(2-fluorobenzylidene)-1-methyl-3-propyl-1,9-dihydro-11 <i>H</i> -pyrazolo[4',3':4,5]pyrimido[2,1- <i>a</i> ]isoindol-11-one ( <b>6x</b> ) .....   | S67        |
| (Z)-9-(2-chlorobenzylidene)-1-methyl-3-propyl-1,9-dihydro-11 <i>H</i> -pyrazolo[4',3':4,5]pyrimido[2,1- <i>a</i> ]isoindol-11-one ( <b>6y</b> ) .....   | S68        |
| (Z)-1-methyl-9-(2-methylbenzylidene)-3-propyl-1,9-dihydro-11 <i>H</i> -pyrazolo[4',3':4,5]pyrimido[2,1- <i>a</i> ]isoindol-11-one ( <b>6z</b> ) .....   | S69        |
| (Z)-9-(2-methoxybenzylidene)-1-methyl-3-propyl-1,9-dihydro-11 <i>H</i> -pyrazolo[4',3':4,5]pyrimido[2,1- <i>a</i> ]isoindol-11-one ( <b>6aa</b> ) ..... | S70        |
| (Z)-9-(3-fluorobenzylidene)-1-methyl-3-propyl-1,9-dihydro-11 <i>H</i> -pyrazolo[4',3':4,5]pyrimido[2,1- <i>a</i> ]isoindol-11-one ( <b>6ab</b> ) .....  | S70        |
| (Z)-9-(3-chlorobenzylidene)-1-methyl-3-propyl-1,9-dihydro-11 <i>H</i> -pyrazolo[4',3':4,5]pyrimido[2,1- <i>a</i> ]isoindol-11-one ( <b>6ac</b> ) .....  | S71        |
| (Z)-1-methyl-9-(3-methylbenzylidene)-3-propyl-1,9-dihydro-11 <i>H</i> -pyrazolo[4',3':4,5]pyrimido[2,1- <i>a</i> ]isoindol-11-one ( <b>6ad</b> ) .....  | S72        |
| (Z)-9-(3-methoxybenzylidene)-1-methyl-3-propyl-1,9-dihydro-11 <i>H</i> -pyrazolo[4',3':4,5]pyrimido[2,1- <i>a</i> ]isoindol-11-one ( <b>6ae</b> ) ..... | S73        |
| 2,2'-di(1 <i>H</i> -perimidin-2-yl)-1,1'-biphenyl ( <b>3'</b> ) .....                                                                                   | S73        |
| <b>IV. NMR spectra .....</b>                                                                                                                            | <b>S75</b> |
| 2-(2-bromo-5-fluorophenyl)-1 <i>H</i> -perimidine ( <b>1d</b> ) .....                                                                                   | S75        |
| 2-(2-bromo-6-fluorophenyl)-1 <i>H</i> -perimidine ( <b>1g</b> ).....                                                                                    | S76        |
| 2-(6-bromobenzo[ <i>d</i> ][1,3]dioxol-5-yl)-1 <i>H</i> -perimidine ( <b>1h</b> ).....                                                                  | S77        |
| 2-(1-bromonaphthalen-2-yl)-1 <i>H</i> -perimidine ( <b>1i</b> ).....                                                                                    | S78        |
| 2-(2-bromopyridin-3-yl)-1 <i>H</i> -perimidine ( <b>1j</b> ) .....                                                                                      | S79        |
| 5-(2-bromo-4-fluorophenyl)-1-methyl-3-propyl-1,6-dihydro-7 <i>H</i> -pyrazolo[4,3- <i>d</i> ]pyrimidin-7-one ( <b>4b</b> ) .....                        | S80        |
| 5-(2-bromo-4-chlorophenyl)-1-methyl-3-propyl-1,6-dihydro-7 <i>H</i> -pyrazolo[4,3- <i>d</i> ]pyrimidin-7-one ( <b>4c</b> ).....                         | S81        |
| 5-(2-bromo-4-methylphenyl)-1-methyl-3-propyl-1,6-dihydro-7 <i>H</i> -pyrazolo[4,3- <i>d</i> ]pyrimidin-7-one ( <b>4d</b> ) .....                        | S82        |
| 5-(2-bromo-5-fluorophenyl)-1-methyl-3-propyl-1,6-dihydro-7 <i>H</i> -pyrazolo[4,3- <i>d</i> ]pyrimidin-7-one ( <b>4e</b> ) .....                        | S83        |
| 5-(2-bromo-5-chlorophenyl)-1-methyl-3-propyl-1,6-dihydro-7 <i>H</i> -pyrazolo[4,3- <i>d</i> ]pyrimidin-7-one ( <b>4f</b> ) .....                        | S84        |

|                                                                                                                                           |      |
|-------------------------------------------------------------------------------------------------------------------------------------------|------|
| 5-(2-bromo-5-methoxyphenyl)-1-methyl-3-propyl-1,6-dihydro-7H-pyrazolo[4,3- <i>d</i> ]pyrimidin-7-one ( <b>4g</b> ) .....                  | S85  |
| 5-(2-bromo-6-fluorophenyl)-1-methyl-3-propyl-1,6-dihydro-7H-pyrazolo[4,3- <i>d</i> ]pyrimidin-7-one ( <b>4h</b> ) .....                   | S86  |
| 5-(1-bromonaphthalen-2-yl)-1-methyl-3-propyl-1,6-dihydro-7H-pyrazolo[4,3- <i>d</i> ]pyrimidin-7-one ( <b>4i</b> ) .....                   | S87  |
| 5-(6-bromobenzo[ <i>d</i> ][1,3]dioxol-5-yl)-1-methyl-3-propyl-1,6-dihydro-7H-pyrazolo[4,3- <i>d</i> ]pyrimidin-7-one ( <b>4j</b> ) ..... | S88  |
| 5-(2-bromo-4,5-dimethoxyphenyl)-1-methyl-3-propyl-1,6-dihydro-7H-pyrazolo[4,3- <i>d</i> ]pyrimidin-7-one ( <b>4k</b> ) .....              | S89  |
| 2-(2-bromo-5-methoxyphenyl)-5,6,7,8-tetrahydrobenzo[4,5]thieno[2,3- <i>d</i> ]pyrimidin-4(3 <i>H</i> )-one ( <b>7</b> ) .....             | S90  |
| ( <i>E</i> )-12-benzylidene-12 <i>H</i> -isoindolo[2,1- <i>a</i> ]perimidine ( <b>3a</b> ).....                                           | S91  |
| ( <i>E</i> )-12-benzylidene-10-fluoro-12 <i>H</i> -isoindolo[2,1- <i>a</i> ]perimidine ( <b>3b</b> ) .....                                | S92  |
| ( <i>E</i> )-12-benzylidene-10-chloro-12 <i>H</i> -isoindolo[2,1- <i>a</i> ]perimidine ( <b>3c</b> ) .....                                | S93  |
| ( <i>E</i> )-12-benzylidene-9-fluoro-12 <i>H</i> -isoindolo[2,1- <i>a</i> ]perimidine ( <b>3d</b> ) .....                                 | S94  |
| ( <i>E</i> )-12-benzylidene-9-chloro-12 <i>H</i> -isoindolo[2,1- <i>a</i> ]perimidine ( <b>3e</b> ).....                                  | S95  |
| ( <i>E</i> )-12-benzylidene-9-methoxy-12 <i>H</i> -isoindolo[2,1- <i>a</i> ]perimidine ( <b>3f</b> ).....                                 | S96  |
| ( <i>E</i> )-12-benzylidene-8-fluoro-12 <i>H</i> -isoindolo[2,1- <i>a</i> ]perimidine ( <b>3g</b> ) .....                                 | S97  |
| ( <i>E</i> )-13-benzylidene-13 <i>H</i> -[1,3]dioxolo[4',5':5,6]isoindolo[2,1- <i>a</i> ]perimidine ( <b>3h</b> ) .....                   | S98  |
| ( <i>E</i> )-14-benzylidene-14 <i>H</i> -benzo[5,6]isoindolo[2,1- <i>a</i> ]perimidine ( <b>3i</b> ) .....                                | S99  |
| ( <i>E</i> )-12-benzylidene-12 <i>H</i> -pyrido[3',2':3,4]pyrrolo[1,2- <i>a</i> ]perimidine ( <b>3j</b> ) .....                           | S100 |
| ( <i>E</i> )-12-(naphthalen-1-ylmethylene)-12 <i>H</i> -isoindolo[2,1- <i>a</i> ]perimidine ( <b>3k</b> ).....                            | S101 |
| ( <i>E</i> )-12-(2-methoxybenzylidene)-12 <i>H</i> -isoindolo[2,1- <i>a</i> ]perimidine ( <b>3l</b> ).....                                | S102 |
| ( <i>E</i> )-12-(2-fluorobenzylidene)-12 <i>H</i> -isoindolo[2,1- <i>a</i> ]perimidine ( <b>3m</b> ) .....                                | S103 |
| ( <i>E</i> )-12-(2-chlorobenzylidene)-12 <i>H</i> -isoindolo[2,1- <i>a</i> ]perimidine ( <b>3n</b> ).....                                 | S104 |
| ( <i>E</i> )-12-(2-methylbenzylidene)-12 <i>H</i> -isoindolo[2,1- <i>a</i> ]perimidine ( <b>3o</b> ).....                                 | S105 |
| ( <i>E</i> )-12-(3-methoxybenzylidene)-12 <i>H</i> -isoindolo[2,1- <i>a</i> ]perimidine ( <b>3p</b> ).....                                | S106 |
| ( <i>E</i> )-12-(3-fluorobenzylidene)-12 <i>H</i> -isoindolo[2,1- <i>a</i> ]perimidine ( <b>3q</b> ) .....                                | S107 |
| ( <i>E</i> )-12-(3-chlorobenzylidene)-12 <i>H</i> -isoindolo[2,1- <i>a</i> ]perimidine ( <b>3r</b> ) .....                                | S108 |
| ( <i>E</i> )-12-(3-methylbenzylidene)-12 <i>H</i> -isoindolo[2,1- <i>a</i> ]perimidine ( <b>3s</b> ) .....                                | S109 |
| ( <i>E</i> )-12-(3-nitrobenzylidene)-12 <i>H</i> -isoindolo[2,1- <i>a</i> ]perimidine ( <b>3t</b> ).....                                  | S110 |



|                                                                                                                                                                                    |      |
|------------------------------------------------------------------------------------------------------------------------------------------------------------------------------------|------|
| ( <i>E</i> )-12-(4-bromobenzylidene)-12 <i>H</i> -isoindolo[2,1- <i>a</i> ]perimidine ( <b>3u</b> ) .....                                                                          | S111 |
| ( <i>E</i> )-12-(4-chlorobenzylidene)-12 <i>H</i> -isoindolo[2,1- <i>a</i> ]perimidine ( <b>3v</b> ) .....                                                                         | S112 |
| ( <i>E</i> )-9-benzylidene-1-methyl-3-propyl-1,9-dihydro-11 <i>H</i> -pyrazolo[4',3':4,5]pyrimido[2,1- <i>a</i> ]isoindol-11-one ( <b>5a</b> ) .....                               | S113 |
| ( <i>E</i> )-9-benzylidene-7-fluoro-1-methyl-3-propyl-1,9-dihydro-11 <i>H</i> -pyrazolo[4',3':4,5]pyrimido[2,1- <i>a</i> ]isoindol-11-one ( <b>5b</b> ) .....                      | S114 |
| ( <i>E</i> )-9-benzylidene-7-chloro-1-methyl-3-propyl-1,9-dihydro-11 <i>H</i> -pyrazolo[4',3':4,5]pyrimido[2,1- <i>a</i> ]isoindol-11-one ( <b>5c</b> ) .....                      | S115 |
| ( <i>E</i> )-9-benzylidene-1,7-dimethyl-3-propyl-1,9-dihydro-11 <i>H</i> -pyrazolo[4',3':4,5]pyrimido[2,1- <i>a</i> ]isoindol-11-one ( <b>5d</b> ) .....                           | S116 |
| ( <i>E</i> )-9-benzylidene-6-fluoro-1-methyl-3-propyl-1,9-dihydro-11 <i>H</i> -pyrazolo[4',3':4,5]pyrimido[2,1- <i>a</i> ]isoindol-11-one ( <b>5e</b> ) .....                      | S117 |
| ( <i>E</i> )-9-benzylidene-6-chloro-1-methyl-3-propyl-1,9-dihydro-11 <i>H</i> -pyrazolo[4',3':4,5]pyrimido[2,1- <i>a</i> ]isoindol-11-one ( <b>5f</b> ) .....                      | S118 |
| ( <i>E</i> )-9-benzylidene-6-methoxy-1-methyl-3-propyl-1,9-dihydro-11 <i>H</i> -pyrazolo[4',3':4,5]pyrimido[2,1- <i>a</i> ]isoindol-11-one ( <b>5g</b> ) .....                     | S119 |
| ( <i>E</i> )-9-benzylidene-6-fluoro-1-methyl-3-propyl-1,9-dihydro-11 <i>H</i> -pyrazolo[4',3':4,5]pyrimido[2,1- <i>a</i> ]isoindol-11-one ( <b>5h</b> ) .....                      | S120 |
| ( <i>E</i> )-13-benzylidene-10-methyl-8-propyl-10,13-dihydro-11 <i>H</i> -benzo[ <i>e</i> ]pyrazolo[4',3':4,5]pyrimido[2,1- <i>a</i> ]isoindol-11-one ( <b>5i</b> ) .....          | S121 |
| ( <i>E</i> )-10-benzylidene-1-methyl-3-propyl-1,10-dihydro-12 <i>H</i> -[1,3]dioxolo[4,5- <i>f</i> ]pyrazolo[4',3':4,5]pyrimido[2,1- <i>a</i> ]isoindol-12-one ( <b>5j</b> ) ..... | S122 |
| ( <i>E</i> )-9-benzylidene-6,7-dimethoxy-1-methyl-3-propyl-1,9-dihydro-11 <i>H</i> -pyrazolo[4',3':4,5]pyrimido[2,1- <i>a</i> ]isoindol-11-one ( <b>5k</b> ) .....                 | S123 |
| ( <i>E</i> )-6,7-dimethoxy-9-(2-methoxybenzylidene)-1-methyl-3-propyl-1,9-dihydro-11 <i>H</i> -pyrazolo[4',3':4,5]pyrimido[2,1- <i>a</i> ]isoindol-11-one ( <b>5l</b> ) .....      | S124 |
| ( <i>E</i> )-1-methyl-9-(naphthalen-2-ylmethylene)-3-propyl-1,9-dihydro-11 <i>H</i> -pyrazolo[4',3':4,5]pyrimido[2,1- <i>a</i> ]isoindol-11-one ( <b>5m</b> ) .....                | S125 |
| ( <i>E</i> )-1-methyl-3-propyl-9-(thiophen-2-ylmethylene)-1,9-dihydro-11 <i>H</i> -pyrazolo[4',3':4,5]pyrimido[2,1- <i>a</i> ]isoindol-11-one ( <b>5n</b> ) .....                  | S126 |
| ( <i>E</i> )-9-(4-fluorobenzylidene)-1-methyl-3-propyl-1,9-dihydro-11 <i>H</i> -pyrazolo[4',3':4,5]pyrimido[2,1- <i>a</i> ]isoindol-11-one ( <b>5o</b> ) .....                     | S127 |
| ( <i>E</i> )-9-(4-chlorobenzylidene)-1-methyl-3-propyl-1,9-dihydro-11 <i>H</i> -pyrazolo[4',3':4,5]pyrimido[2,1- <i>a</i> ]isoindol-11-one ( <b>5p</b> ) .....                     | S128 |

|                                                                                                                                                                  |      |
|------------------------------------------------------------------------------------------------------------------------------------------------------------------|------|
| ( <i>E</i> )-1-methyl-9-(4-methylbenzylidene)-3-propyl-1,9-dihydro-11 <i>H</i> -pyrazolo[4',3':4,5]pyrimido[2,1- <i>a</i> ]isoindol-11-one ( <b>5q</b> ) .....   | S129 |
| ( <i>E</i> )-9-(4-methoxybenzylidene)-1-methyl-3-propyl-1,9-dihydro-11 <i>H</i> -pyrazolo[4',3':4,5]pyrimido[2,1- <i>a</i> ]isoindol-11-one ( <b>5r</b> ) .....  | S130 |
| ( <i>E</i> )-9-(4-ethylbenzylidene)-1-methyl-3-propyl-1,9-dihydro-11 <i>H</i> -pyrazolo[4',3':4,5]pyrimido[2,1- <i>a</i> ]isoindol-11-one ( <b>5s</b> ) .....    | S131 |
| ( <i>E</i> )-9-(4-ethoxybenzylidene)-1-methyl-3-propyl-1,9-dihydro-11 <i>H</i> -pyrazolo[4',3':4,5]pyrimido[2,1- <i>a</i> ]isoindol-11-one ( <b>5t</b> ) .....   | S132 |
| ( <i>E</i> )-1-methyl-3-propyl-9-(4-propylbenzylidene)-1,9-dihydro-11 <i>H</i> -pyrazolo[4',3':4,5]pyrimido[2,1- <i>a</i> ]isoindol-11-one ( <b>5u</b> ) .....   | S133 |
| ( <i>E</i> )-9-(4-butylbenzylidene)-1-methyl-3-propyl-1,9-dihydro-11 <i>H</i> -pyrazolo[4',3':4,5]pyrimido[2,1- <i>a</i> ]isoindol-11-one ( <b>5v</b> ) .....    | S134 |
| ( <i>E</i> )-1-methyl-9-(4-pentylbenzylidene)-3-propyl-1,9-dihydro-11 <i>H</i> -pyrazolo[4',3':4,5]pyrimido[2,1- <i>a</i> ]isoindol-11-one ( <b>5w</b> ) .....   | S135 |
| ( <i>E</i> )-9-(2-fluorobenzylidene)-1-methyl-3-propyl-1,9-dihydro-11 <i>H</i> -pyrazolo[4',3':4,5]pyrimido[2,1- <i>a</i> ]isoindol-11-one ( <b>5x</b> ) .....   | S136 |
| ( <i>E</i> )-9-(2-chlorobenzylidene)-1-methyl-3-propyl-1,9-dihydro-11 <i>H</i> -pyrazolo[4',3':4,5]pyrimido[2,1- <i>a</i> ]isoindol-11-one ( <b>5y</b> ) .....   | S137 |
| ( <i>E</i> )-1-methyl-9-(2-methylbenzylidene)-3-propyl-1,9-dihydro-11 <i>H</i> -pyrazolo[4',3':4,5]pyrimido[2,1- <i>a</i> ]isoindol-11-one ( <b>5z</b> ) .....   | S138 |
| ( <i>E</i> )-9-(2-methoxybenzylidene)-1-methyl-3-propyl-1,9-dihydro-11 <i>H</i> -pyrazolo[4',3':4,5]pyrimido[2,1- <i>a</i> ]isoindol-11-one ( <b>5aa</b> ) ..... | S139 |
| ( <i>E</i> )-9-(3-fluorobenzylidene)-1-methyl-3-propyl-1,9-dihydro-11 <i>H</i> -pyrazolo[4',3':4,5]pyrimido[2,1- <i>a</i> ]isoindol-11-one ( <b>5ab</b> ) .....  | S140 |
| ( <i>E</i> )-9-(3-chlorobenzylidene)-1-methyl-3-propyl-1,9-dihydro-11 <i>H</i> -pyrazolo[4',3':4,5]pyrimido[2,1- <i>a</i> ]isoindol-11-one ( <b>5ac</b> ) .....  | S141 |
| ( <i>E</i> )-1-methyl-9-(3-methylbenzylidene)-3-propyl-1,9-dihydro-11 <i>H</i> -pyrazolo[4',3':4,5]pyrimido[2,1- <i>a</i> ]isoindol-11-one ( <b>5ad</b> ) .....  | S142 |
| ( <i>E</i> )-9-(3-methoxybenzylidene)-1-methyl-3-propyl-1,9-dihydro-11 <i>H</i> -pyrazolo[4',3':4,5]pyrimido[2,1- <i>a</i> ]isoindol-11-one ( <b>5ae</b> ) ..... | S143 |
| ( <i>E</i> )-11-benzylidene-8-methoxy-2,3,4,11-tetrahydrobenzo[4',5']thieno[2',3':4,5]pyrimido[2,1- <i>a</i> ]isoindol-13(1 <i>H</i> )-one ( <b>5af</b> ) .....  | S144 |
| ( <i>Z</i> )-9-benzylidene-1-methyl-3-propyl-1,9-dihydro-11 <i>H</i> -pyrazolo[4',3':4,5]pyrimido[2,1- <i>a</i> ]isoindol-11-one ( <b>6a</b> ) .....             | S145 |

|                                                                                                                                                                           |      |
|---------------------------------------------------------------------------------------------------------------------------------------------------------------------------|------|
| (Z)-9-benzylidene-7-fluoro-1-methyl-3-propyl-1,9-dihydro-11 <i>H</i> -pyrazolo[4',3':4,5]pyrimido[2,1- <i>a</i> ]isoindol-11-one ( <b>6b</b> ) .....                      | S146 |
| (Z)-9-benzylidene-7-chloro-1-methyl-3-propyl-1,9-dihydro-11 <i>H</i> -pyrazolo[4',3':4,5]pyrimido[2,1- <i>a</i> ]isoindol-11-one ( <b>6c</b> ) .....                      | S147 |
| (Z)-9-benzylidene-1,7-dimethyl-3-propyl-1,9-dihydro-11 <i>H</i> -pyrazolo[4',3':4,5]pyrimido[2,1- <i>a</i> ]isoindol-11-one ( <b>6d</b> ) .....                           | S148 |
| (Z)-9-benzylidene-6-fluoro-1-methyl-3-propyl-1,9-dihydro-11 <i>H</i> -pyrazolo[4',3':4,5]pyrimido[2,1- <i>a</i> ]isoindol-11-one ( <b>6e</b> ) .....                      | S149 |
| (Z)-9-benzylidene-6-chloro-1-methyl-3-propyl-1,9-dihydro-11 <i>H</i> -pyrazolo[4',3':4,5]pyrimido[2,1- <i>a</i> ]isoindol-11-one ( <b>6f</b> ) .....                      | S150 |
| (Z)-9-benzylidene-6-methoxy-1-methyl-3-propyl-1,9-dihydro-11 <i>H</i> -pyrazolo[4',3':4,5]pyrimido[2,1- <i>a</i> ]isoindol-11-one ( <b>6g</b> ) .....                     | S151 |
| (Z)-9-benzylidene-5-fluoro-1-methyl-3-propyl-1,9-dihydro-11 <i>H</i> -pyrazolo[4',3':4,5]pyrimido[2,1- <i>a</i> ]isoindol-11-one ( <b>6h</b> ) .....                      | S152 |
| (Z)-11-benzylidene-1-methyl-3-propyl-1,11-dihydro-13 <i>H</i> -benzo[ <i>f</i> ]pyrazolo[4',3':4,5]pyrimido[2,1- <i>a</i> ]isoindol-13-one ( <b>6i</b> ) .....            | S153 |
| (Z)-10-benzylidene-1-methyl-3-propyl-1,10-dihydro-12 <i>H</i> -[1,3]dioxolo[4,5- <i>f</i> ]pyrazolo[4',3':4,5]pyrimido[2,1- <i>a</i> ]isoindol-12-one ( <b>6j</b> ) ..... | S154 |
| (Z)-9-benzylidene-6,7-dimethoxy-1-methyl-3-propyl-1,9-dihydro-11 <i>H</i> -pyrazolo[4',3':4,5]pyrimido[2,1- <i>a</i> ]isoindol-11-one ( <b>6k</b> ) .....                 | S155 |
| (Z)-6,7-dimethoxy-9-(2-methoxybenzylidene)-1-methyl-3-propyl-1,9-dihydro-11 <i>H</i> -pyrazolo[4',3':4,5]pyrimido[2,1- <i>a</i> ]isoindol-11-one ( <b>6l</b> ) .....      | S156 |
| (Z)-1-methyl-9-(naphthalen-2-ylmethylene)-3-propyl-1,9-dihydro-11 <i>H</i> -pyrazolo[4',3':4,5]pyrimido[2,1- <i>a</i> ]isoindol-11-one ( <b>6m</b> ) .....                | S157 |
| (Z)-1-methyl-3-propyl-9-(thiophen-2-ylmethylene)-1,9-dihydro-11 <i>H</i> -pyrazolo[4',3':4,5]pyrimido[2,1- <i>a</i> ]isoindol-11-one ( <b>6n</b> ) .....                  | S158 |
| (Z)-9-(4-fluorobenzylidene)-1-methyl-3-propyl-1,9-dihydro-11 <i>H</i> -pyrazolo[4',3':4,5]pyrimido[2,1- <i>a</i> ]isoindol-11-one ( <b>6o</b> ) .....                     | S159 |
| (Z)-9-(4-chlorobenzylidene)-1-methyl-3-propyl-1,9-dihydro-11 <i>H</i> -pyrazolo[4',3':4,5]pyrimido[2,1- <i>a</i> ]isoindol-11-one ( <b>6p</b> ) .....                     | S160 |
| (Z)-1-methyl-9-(4-methylbenzylidene)-3-propyl-1,9-dihydro-11 <i>H</i> -pyrazolo[4',3':4,5]pyrimido[2,1- <i>a</i> ]isoindol-11-one ( <b>6q</b> ) .....                     | S161 |
| (Z)-9-(4-methoxybenzylidene)-1-methyl-3-propyl-1,9-dihydro-11 <i>H</i> -pyrazolo[4',3':4,5]pyrimido[2,1- <i>a</i> ]isoindol-11-one ( <b>6r</b> ) .....                    | S162 |

|                                                                                                                                                             |             |
|-------------------------------------------------------------------------------------------------------------------------------------------------------------|-------------|
| (Z)-9-(4-ethylbenzylidene)-1-methyl-3-propyl-1,9-dihydro-11 <i>H</i> -pyrazolo[4',3':4,5]pyrimido[2,1- <i>a</i> ]isoindol-11-one ( <b>6s</b> ) .....        | S163        |
| (Z)-9-(4-ethoxybenzylidene)-1-methyl-3-propyl-1,9-dihydro-11 <i>H</i> -pyrazolo[4',3':4,5]pyrimido[2,1- <i>a</i> ]isoindol-11-one ( <b>6t</b> ).....        | S164        |
| (Z)-1-methyl-3-propyl-9-(4-propylbenzylidene)-1,9-dihydro-11 <i>H</i> -pyrazolo[4',3':4,5]pyrimido[2,1- <i>a</i> ]isoindol-11-one ( <b>6u</b> ) .....       | S165        |
| (Z)-9-(4-butylbenzylidene)-1-methyl-3-propyl-1,9-dihydro-11 <i>H</i> -pyrazolo[4',3':4,5]pyrimido[2,1- <i>a</i> ]isoindol-11-one ( <b>6v</b> ) .....        | S166        |
| (Z)-1-methyl-9-(4-pentylbenzylidene)-3-propyl-1,9-dihydro-11 <i>H</i> -pyrazolo[4',3':4,5]pyrimido[2,1- <i>a</i> ]isoindol-11-one ( <b>6w</b> ) .....       | S167        |
| (Z)-9-(2-fluorobenzylidene)-1-methyl-3-propyl-1,9-dihydro-11 <i>H</i> -pyrazolo[4',3':4,5]pyrimido[2,1- <i>a</i> ]isoindol-11-one ( <b>6x</b> ) .....       | S168        |
| (Z)-9-(2-chlorobenzylidene)-1-methyl-3-propyl-1,9-dihydro-11 <i>H</i> -pyrazolo[4',3':4,5]pyrimido[2,1- <i>a</i> ]isoindol-11-one ( <b>6y</b> ) .....       | S169        |
| (Z)-1-methyl-9-(2-methylbenzylidene)-3-propyl-1,9-dihydro-11 <i>H</i> -pyrazolo[4',3':4,5]pyrimido[2,1- <i>a</i> ]isoindol-11-one ( <b>6z</b> ) .....       | S170        |
| (Z)-9-(2-methoxybenzylidene)-1-methyl-3-propyl-1,9-dihydro-11 <i>H</i> -<br>pyrazolo[4',3':4,5]pyrimido[2,1- <i>a</i> ]isoindol-11-one ( <b>6aa</b> ) ..... | S171        |
| (Z)-9-(3-fluorobenzylidene)-1-methyl-3-propyl-1,9-dihydro-11 <i>H</i> -pyrazolo[4',3':4,5]pyrimido[2,1- <i>a</i> ]isoindol-11-one ( <b>6ab</b> ) .....      | S172        |
| (Z)-9-(3-chlorobenzylidene)-1-methyl-3-propyl-1,9-dihydro-11 <i>H</i> -pyrazolo[4',3':4,5]pyrimido[2,1- <i>a</i> ]isoindol-11-one ( <b>6ac</b> ) .....      | S173        |
| (Z)-1-methyl-9-(3-methylbenzylidene)-3-propyl-1,9-dihydro-11 <i>H</i> -pyrazolo[4',3':4,5]pyrimido[2,1- <i>a</i> ]isoindol-11-one ( <b>6ad</b> ) .....      | S174        |
| (Z)-9-(3-methoxybenzylidene)-1-methyl-3-propyl-1,9-dihydro-11 <i>H</i> -<br>pyrazolo[4',3':4,5]pyrimido[2,1- <i>a</i> ]isoindol-11-one ( <b>6ae</b> ) ..... | S175        |
| 2,2'-di(1 <i>H</i> -perimidin-2-yl)-1,1'-biphenyl ( <b>3'</b> ) .....                                                                                       | S176        |
| <b>V. References .....</b>                                                                                                                                  | <b>S177</b> |

## I. General information

All reagents were purchased from commercial sources and used without treatment unless otherwise indicated. The products were purified by column chromatography over silica gel.  $^1\text{H}$  NMR and  $^{13}\text{C}$  NMR spectra were recorded at 25 °C on a Varian spectrometer at 400 MHz and 101 MHz, respectively, with TMS as the internal standard. Mass spectra were recorded on a BRUKER AutoflexIII Smartbeam MS-spectrometer. High resolution mass spectra (HRMS) were recorded on Bruker microTof using ESI-TOF method.

## II. Crystallography

Compound **3p** (50 mg) was dissolved in a centrifuge tube in 150  $\mu\text{L}$   $\text{CDCl}_3$ . Upon standing for several days (seven days), crystals suitable for X-ray diffraction of **3p**, **6d** and **5aa** were obtained. The structures of the *N*-fused heterocyclic scaffolds were further established by X-ray diffraction. Single-crystal X-ray diffraction data for the reported compound was recorded at a temperature of 296(2) K on an Oxford Diffraction Gemini R Ultra diffractometer using a  $\omega$  scan technique with Mo-K $\alpha$  radiation ( $\lambda = 0.71073 \text{ \AA}$ ). The structures were solved by the Direct Method of SHELXS-97 and refined by full-matrix least-squares techniques using the SHELXL-97 program.<sup>1</sup> Non-hydrogen atoms were refined with anisotropic temperature parameters, and hydrogen atoms of the ligands were refined as rigid groups. Basic information pertaining to crystal parameters and structure refinement is summarized in Tables S1, S2 and S3.

**Table S1.** Crystal structure and refinement data for compound **3p** (thermal ellipsoids at 30% probability).

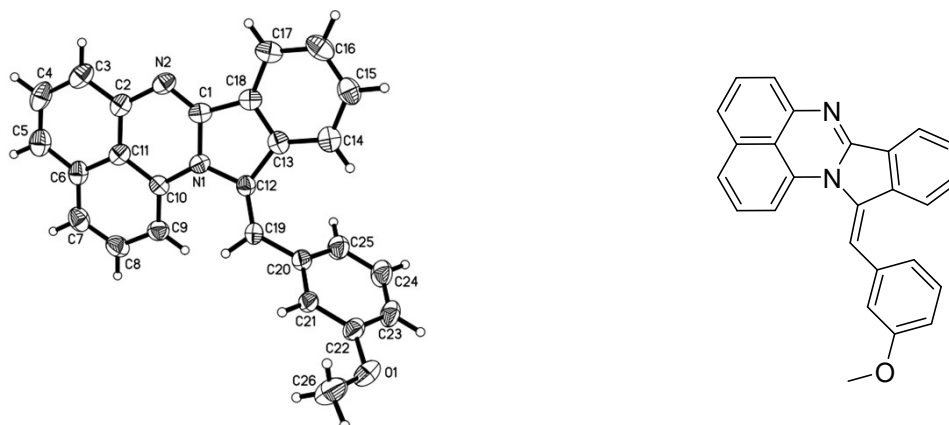

|                                   |                                                                                                                   |
|-----------------------------------|-------------------------------------------------------------------------------------------------------------------|
| Empirical formula                 | C <sub>26</sub> H <sub>18</sub> N <sub>2</sub> O                                                                  |
| Temperature                       | 296(2) K                                                                                                          |
| Wavelength                        | 0.71073 Å                                                                                                         |
| Space group                       | P2(1)/n                                                                                                           |
| Unit cell dimensions              | a = 11.023(4) Å<br>b = 14.004(6) Å<br>c = 13.233(5) Å<br>alpha = 90 deg.<br>beta = 114.61 deg.<br>gamma = 90 deg. |
| Volume                            | 1856.9(13) Å <sup>3</sup>                                                                                         |
| Z                                 | 4                                                                                                                 |
| Calculated density                | 1.339 Mg/m <sup>3</sup>                                                                                           |
| Absorption coefficient            | 0.082 mm <sup>-1</sup>                                                                                            |
| F(000)                            | 784                                                                                                               |
| Crystal size                      | 0.122 x 0.100 x 0.089 mm                                                                                          |
| Theta range for data collection   | 2.50 to 22.77 deg.                                                                                                |
| Reflections collected / unique    | 4758 / 1784 [R(int) = 0.0515]                                                                                     |
| Data / restraints / parameters    | 1784 / 0 / 263                                                                                                    |
| Goodness-of-fit on F <sup>2</sup> | 0.969                                                                                                             |
| Final R indices [I>2sigma(I)]     | R1 = 0.0441, wR2 = 0.0802                                                                                         |
| R indices (all data)              | R1 = 0.0762, wR2 = 0.0854                                                                                         |

**Table S2.** Crystal structure and refinement data for compound **6d** (thermal ellipsoids at 30% probability).

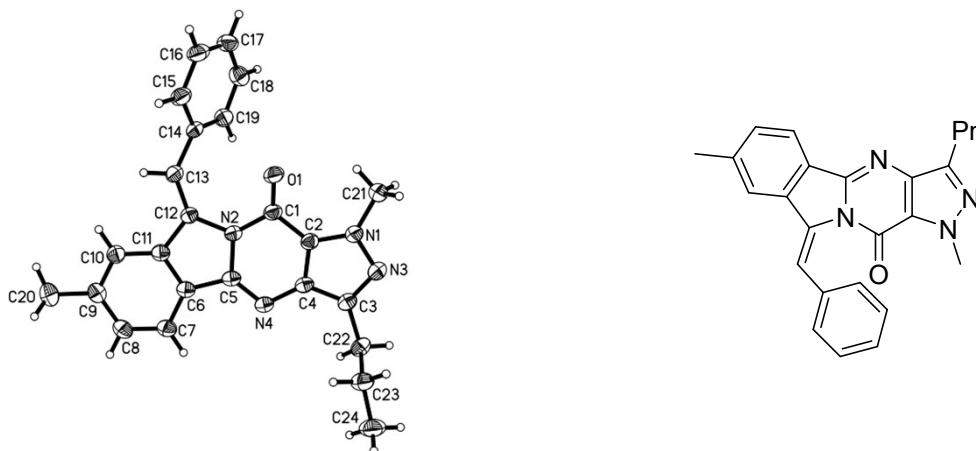

|                                   |                                                                                                                                   |
|-----------------------------------|-----------------------------------------------------------------------------------------------------------------------------------|
| Empirical formula                 | C <sub>24</sub> H <sub>22</sub> N <sub>4</sub> O                                                                                  |
| Temperature                       | 296(2) K                                                                                                                          |
| Wavelength                        | 0.71073 Å                                                                                                                         |
| Space group                       | P2(1)/c                                                                                                                           |
| Unit cell dimensions              | a = 9.810(7) Å<br>b = 10.948(8) Å<br>c = 11.015(8) Å<br>alpha = 61.711(8) deg.<br>beta = 82.606(9) deg.<br>gamma = 76.072(9) deg. |
| Volume                            | 1011.0(12) Å <sup>3</sup>                                                                                                         |
| Z                                 | 2                                                                                                                                 |
| Calculated density                | 1.256 Mg/m <sup>3</sup>                                                                                                           |
| Absorption coefficient            | 0.079 mm <sup>-1</sup>                                                                                                            |
| F(000)                            | 404                                                                                                                               |
| Crystal size                      | 0.134 x 0.122 x 0.088 mm                                                                                                          |
| Theta range for data collection   | 3.024 to 25.017 deg.                                                                                                              |
| Reflections collected / unique    | 5137 / 3508 [R(int) = 0.0139]                                                                                                     |
| Data / restraints / parameters    | 3508 / 0 / 262                                                                                                                    |
| Goodness-of-fit on F <sup>2</sup> | 1.040                                                                                                                             |
| Final R indices [I > 2sigma(I)]   | R1 = 0.0482, wR2 = 0.1320                                                                                                         |
| R indices (all data)              | R1 = 0.0578, wR2 = 0.1420                                                                                                         |

**Table S3.** Crystal structure and refinement data for compound **5aa** (thermal ellipsoids at 30% probability).

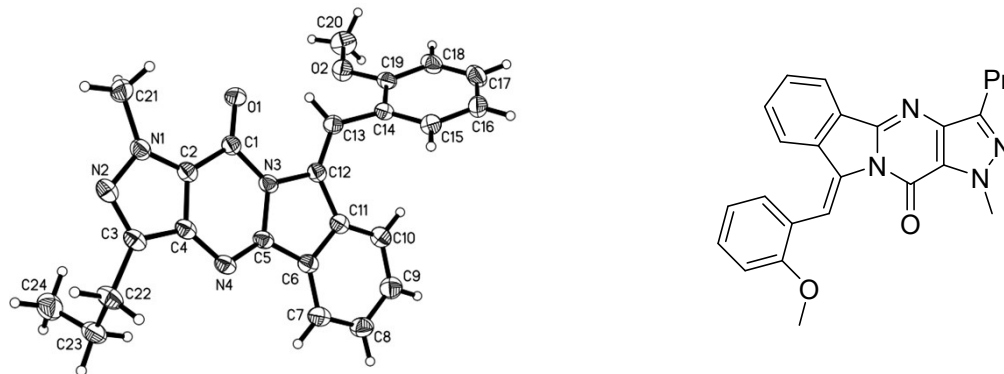

|                                   |                                                                                                                                               |
|-----------------------------------|-----------------------------------------------------------------------------------------------------------------------------------------------|
| Empirical formula                 | C <sub>24</sub> H <sub>22</sub> N <sub>4</sub> O <sub>2</sub>                                                                                 |
| Temperature                       | 296(2) K                                                                                                                                      |
| Wavelength                        | 0.71073 Å                                                                                                                                     |
| Space group                       | P-1                                                                                                                                           |
| Unit cell dimensions              | a = 8.8519(9) Å<br>b = 9.9144(11) Å<br>c = 12.8442(14) Å<br>alpha = 108.2800(10) deg.<br>beta = 93.0630(10) deg.<br>gamma = 108.3660(10) deg. |
| Volume                            | 1001.21(19) Å <sup>3</sup>                                                                                                                    |
| Z                                 | 2                                                                                                                                             |
| Calculated density                | 1.322 Mg/m <sup>3</sup>                                                                                                                       |
| Absorption coefficient            | 0.087 mm <sup>-1</sup>                                                                                                                        |
| F(000)                            | 420                                                                                                                                           |
| Crystal size                      | 0.142 x 0.123 x 0.088 mm                                                                                                                      |
| Theta range for data collection   | 2.309 to 25.018 deg.                                                                                                                          |
| Reflections collected / unique    | 5053 / 3473 [R(int) = 0.0183]                                                                                                                 |
| Data / restraints / parameters    | 3473 / 0 / 272                                                                                                                                |
| Goodness-of-fit on F <sup>2</sup> | 1.057                                                                                                                                         |
| Final R indices [I > 2sigma(I)]   | R1 = 0.0415, wR2 = 0.1137                                                                                                                     |
| R indices (all data)              | R1 = 0.0474, wR2 = 0.1201                                                                                                                     |



### III. Synthesis and analytical data of compounds 1, 3, 4, 5, 6 and 7

**Note:** Compound 1 can be synthesized by the cited literature method, where 1d, 1g, 1h, 1i and 1j are new.

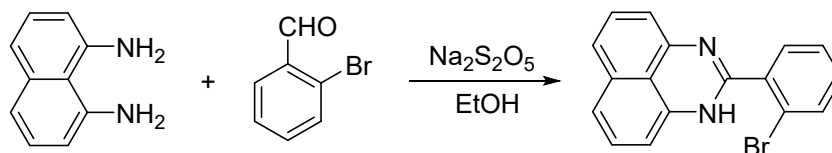

**General procedure for preparation of 2-(2-bromophenyl)-1H-perimidine<sup>2</sup>:** A mixture of the 1,8-diaminonaphthalene (158.20 mg, 1 mmol) and the 2-bromobenzaldehyde (194.27 mg, 1.05 mmol) in anhydrous ethanol (20 mL) was prepared in a round-bottom flask (100 mL) equipped with a magnetic stirrer. Then, the mixture was heated up to 50 °C in an oil bath and sodium pyrosulfite (380.18 mg, 2 eq.) was added. The resulting mixture was monitored by TLC and stirred for the appropriate time. Upon completion of the reaction, the reaction mixture was poured into water (60 mL). The precipitate was filtered, rinsed with water (6 mL × 2) and dried under air.

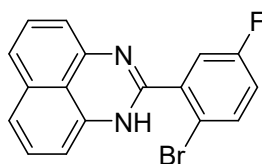

#### 2-(2-bromo-5-fluorophenyl)-1H-perimidine (1d)

Orange solid; mp 117-119 °C; <sup>1</sup>H NMR (DMSO-*d*<sub>6</sub>, 400 MHz): δ<sub>H</sub> 10.99 (s, 1H), 7.83–7.79 (m, 1H), 7.61–7.58 (m, 1H), 7.39–7.34 (m, 1H), 7.17–7.12 (m, 2H), 7.09–7.06 (m, 2H), 6.50–6.47 (m, 2H); <sup>13</sup>C NMR (DMSO-*d*<sub>6</sub>, 101 MHz): δ<sub>C</sub> 161.2 (d, *J*<sub>C-F</sub> = 244.8 Hz), 153.0, 144.8, 138.2 (d, *J*<sub>C-F</sub> = 8.1 Hz), 135.1, 134.7 (d, *J*<sub>C-F</sub> = 8.1 Hz), 128.9, 128.0, 121.8, 119.7, 118.5 (d, *J*<sub>C-F</sub> = 22.2 Hz), 118.0, 117.6 (d, *J*<sub>C-F</sub> = 24.0 Hz), 115.6 (d, *J*<sub>C-F</sub> = 3.3 Hz), 114.0, 102.4; HRMS (ESI-TOF, *m/z*): calcd for C<sub>17</sub>H<sub>11</sub>BrFN<sub>2</sub> [M + H]<sup>+</sup>, 341.0084; found, 341.0095.

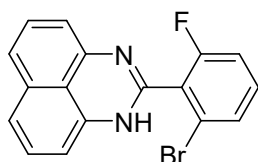

### 2-(2-bromo-6-fluorophenyl)-1H-perimidine (1g)

White solid; mp 127-129 °C;  $^1\text{H}$  NMR (DMSO- $d_6$ , 400 MHz):  $\delta_{\text{H}}$  11.03 (s, 1H), 7.64 (d,  $J$  = 8.0 Hz, 1H), 7.55–7.43 (m, 2H), 7.21–7.16 (m, 1H), 7.12–7.08 (m, 2H), 7.05 (d,  $J$  = 8.0 Hz, 1H), 6.62 (d,  $J$  = 7.2 Hz, 1H), 6.30 (d,  $J$  = 7.2 Hz, 1H);  $^{13}\text{C}$  NMR (DMSO- $d_6$ , 101 MHz):  $\delta_{\text{C}}$  158.7 (d,  $J_{\text{C-F}}$  = 246.8 Hz), 148.4, 143.7, 137.1, 134.2, 131.6 (d,  $J_{\text{C-F}}$  = 2.3 Hz), 127.8 (d,  $J_{\text{C-F}}$  = 22.3 Hz), 127.1 (d,  $J_{\text{C-F}}$  = 1.1 Hz), 124.0, 121.2, 120.8, 118.9, 117.1, 114.3 (d,  $J_{\text{C-F}}$  = 21.9 Hz), 113.0, 101.4; HRMS (ESI-TOF,  $m/z$ ): calcd for  $\text{C}_{17}\text{H}_{11}\text{BrFN}_2$  [ $\text{M} + \text{H}$ ] $^+$ , 341.0084; found, 341.0088.

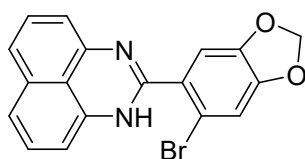

### 2-(6-bromobenzo[*d*][1,3]dioxol-5-yl)-1H-perimidine (1h)

White solid; mp 131-132 °C;  $^1\text{H}$  NMR (DMSO- $d_6$ , 400 MHz):  $\delta_{\text{H}}$  10.78 (s, 1H), 7.35 (s, 1H), 7.21 (s, 1H), 7.14–7.11 (m, 2H), 7.05–7.03 (m, 2H), 6.45–6.44 (m, 2H), 6.16 (s, 2H);  $^{13}\text{C}$  NMR (DMSO- $d_6$ , 101 MHz):  $\delta_{\text{C}}$  154.4, 149.7, 147.2, 139.4, 135.0, 128.5, 126.9, 121.5, 119.7, 112.8, 112.2, 110.1, 108.2, 102.7; HRMS (ESI-TOF,  $m/z$ ): calcd for  $\text{C}_{18}\text{H}_{12}\text{BrO}_2\text{N}_2$  [ $\text{M} + \text{H}$ ] $^+$ , 367.0077; found, 367.0102.

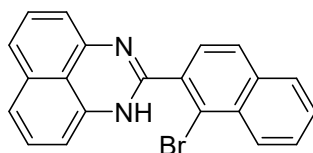

### 2-(1-bromonaphthalen-2-yl)-1H-perimidine (1i)

White solid; mp 203-205 °C;  $^1\text{H}$  NMR (DMSO- $d_6$ , 400 MHz):  $\delta_{\text{H}}$  11.77 (s, 1H), 8.32 (d,  $J$  = 8.4 Hz, 1H), 8.17–8.11 (m, 2H), 7.83–7.72 (m, 3H), 7.23–7.15 (m, 4H), 6.61–5.59 (m, 2H);  $^{13}\text{C}$  NMR (DMSO- $d_6$ , 101 MHz):  $\delta_{\text{C}}$  155.2, 135.0, 134.3, 133.3, 131.1, 130.1, 128.8, 128.6, 128.53, 128.50, 128.1, 127.0, 126.4, 123.8, 121.6, 121.4, 119.5; HRMS (ESI-TOF,  $m/z$ ): calcd for  $\text{C}_{21}\text{H}_{14}\text{BrN}_2$  [ $\text{M} + \text{H}$ ] $^+$ , 373.0335; found, 373.0356.

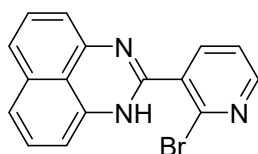

### 2-(2-bromopyridin-3-yl)-1H-perimidine (1j)

White solid; mp 122-123 °C;  $^1\text{H}$  NMR (DMSO- $d_6$ , 400 MHz):  $\delta_{\text{H}}$  11.09 (s, 1H), 8.55–8.54 (m, 1H), 8.09–8.07 (m, 1H), 7.64–7.60 (m, 1H), 7.18–7.14 (m, 2H), 7.10–7.08 (m, 2H), 6.51–6.49

(m, 2H);  $^{13}\text{C}$  NMR (DMSO- $d_6$ , 101 MHz):  $\delta_{\text{C}}$  152.9, 151.2, 139.9, 139.2, 135.1, 133.4, 128.5, 123.5, 121.8, 119.1; HRMS (ESI-TOF,  $m/z$ ): calcd for  $\text{C}_{16}\text{H}_{11}\text{BrN}_3$  [ $\text{M} + \text{H}$ ] $^+$ , 324.0131; found, 324.0137.

**Note:** Compound 4 can be synthesized by the cited literature method, where 4b-4k are new.

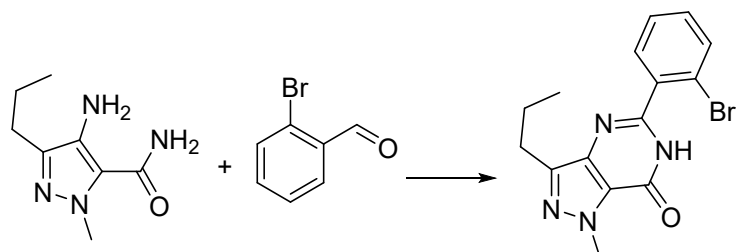

**General procedure for preparation of 5-(2-bromophenyl)-1-methyl-3-propyl-1,6-dihydro-7H-pyrazolo[4,3-d]pyrimidin-7-one<sup>3</sup>:** A mixture of the 4-Amino-1-methyl-3-*n*-propyl-1*H*-pyrazole-5-formamide (1.0 g, 5.5 mmol) and the *o*-bromobenzaldehyde (2.02 g, 11 mmol) in xylene (10.0 mL) was prepared in a round-bottom flask (50 mL) equipped with a magnetic stirrer. Then, the mixture was refluxed in an oil bath and methylsulfonic acid (1 drop) was added. The resulting mixture was monitored by TLC and stirred for the appropriate time. Upon completion of the reaction, the reaction mixture was cooled. The precipitate was filtered, rinsed with water (4 mL  $\times$  2) and dried under air.

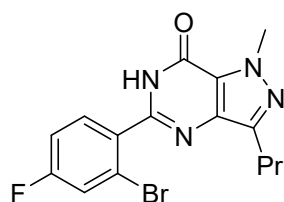

**5-(2-bromo-4-fluorophenyl)-1-methyl-3-propyl-1,6-dihydro-7H-pyrazolo[4,3-d]pyrimidin-7-one**

**(4b)**

White solid; mp 173-174 °C;  $^1\text{H}$  NMR ( $\text{CDCl}_3$ , 400 MHz):  $\delta_{\text{H}}$  11.02 (s, 1H), 7.70–7.66 (m, 1H), 7.45 (dd,  $J = 8.0$  Hz, 2.0 Hz, 1H), 7.19 (t,  $J = 8.4$  Hz, 1H), 4.21 (s, 3H), 2.90 (t,  $J = 7.6$  Hz, 2H), 1.87–1.78 (m, 2H), 1.01 (t,  $J = 7.6$  Hz, 3H);  $^{13}\text{C}$  NMR ( $\text{CDCl}_3$ , 101 MHz):  $\delta_{\text{C}}$  163.3 (d,  $J_{\text{C-F}} = 254.2$  Hz), 155.1, 148.6, 147.0, 138.5, 133.0 (d,  $J_{\text{C-F}} = 8.9$  Hz), 131.4 (d,  $J_{\text{C-F}} = 3.4$  Hz), 124.3, 122.3 (d,  $J_{\text{C-F}} = 9.7$  Hz), 120.9 (d,  $J_{\text{C-F}} = 24.7$  Hz), 115.2 (d,  $J_{\text{C-F}} = 21.2$  Hz), 38.2, 27.6, 22.5, 14.0; HRMS (ESI-TOF,  $m/z$ ): calcd for  $\text{C}_{15}\text{H}_{15}\text{BrFON}_4$  [ $\text{M} + \text{H}$ ] $^+$ , 365.0408; found, 365.0416.

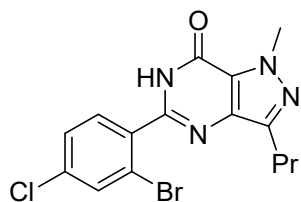

**5-(2-bromo-4-chlorophenyl)-1-methyl-3-propyl-1,6-dihydro-7H-pyrazolo[4,3-d]pyrimidin-7-one (4c)**

White solid; mp 179-182 °C;  $^1\text{H}$  NMR ( $\text{CDCl}_3$ , 400 MHz):  $\delta_{\text{H}}$  11.14 (s, 1H), 7.71 (s, 1H), 7.63–7.60 (m, 1H), 7.45–7.42 (m, 1H), 4.19 (s, 3H), 2.89 (t,  $J = 8.0$  Hz, 2H), 1.87–1.77 (m, 2H), 1.00 (t,  $J = 7.6$  Hz, 3H);  $^{13}\text{C}$  NMR ( $\text{CDCl}_3$ , 101 MHz):  $\delta_{\text{C}}$  155.0, 148.5, 147.0, 138.5, 137.1, 133.5, 133.2, 132.3, 128.1, 124.3, 122.1, 38.2, 27.6, 22.5, 14.0; HRMS (ESI-TOF,  $m/z$ ): calcd for  $\text{C}_{15}\text{H}_{15}\text{BrClON}_4$  [ $\text{M} + \text{H}$ ] $^+$ , 381.0112; found, 381.0116.

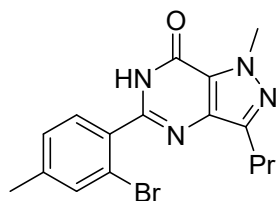

**5-(2-bromo-4-methylphenyl)-1-methyl-3-propyl-1,6-dihydro-7H-pyrazolo[4,3-d]pyrimidin-7-one (4d)**

White solid; mp 189-191 °C;  $^1\text{H}$  NMR ( $\text{CDCl}_3$ , 400 MHz):  $\delta_{\text{H}}$  11.03(s, 1H), 7.56 (d,  $J = 7.6$  Hz, 1H), 7.51 (s, 1H), 7.27–7.23 (m, 1H), 4.23 (s, 3H), 2.90 (t,  $J = 8.0$  Hz, 2H), 2.40 (s, 3H), 1.88–1.77 (m, 2H), 1.00 (t,  $J = 7.2$  Hz, 3H);  $^{13}\text{C}$  NMR ( $\text{CDCl}_3$ , 101 MHz):  $\delta_{\text{C}}$  154.6, 149.5, 146.9, 142.5, 138.5, 134.0, 132.1, 131.3, 128.6, 124.4, 121.0, 38.2, 27.7, 22.5, 21.0, 14.0; HRMS (ESI-TOF,  $m/z$ ): calcd for  $\text{C}_{16}\text{H}_{18}\text{BrON}_4$  [ $\text{M} + \text{H}$ ] $^+$ , 361.0659; found, 361.0668.

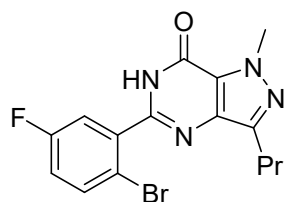

**5-(2-bromo-5-fluorophenyl)-1-methyl-3-propyl-1,6-dihydro-7H-pyrazolo[4,3-d]pyrimidin-7-one (4e)**

White solid; mp 172-174 °C;  $^1\text{H}$  NMR ( $\text{CDCl}_3$ , 400 MHz):  $\delta_{\text{H}}$  10.71 (s, 1H), 7.68–7.65 (m, 1H), 7.46–7.43 (m, 1H), 7.15–7.09 (m, 1H), 4.21 (s, 3H), 2.91 (t,  $J = 7.6$  Hz, 2H), 1.88–1.78 (m, 2H), 1.01 (t,  $J = 7.6$  Hz, 3H);  $^{13}\text{C}$  NMR ( $\text{CDCl}_3$ , 101 MHz):  $\delta_{\text{C}}$  161.7 (d,  $J_{\text{C-F}} = 248.2$  Hz), 155.1, 148.2 (d,  $J_{\text{C-F}} = 2.0$  Hz), 147.1, 138.4, 136.4 (d,  $J_{\text{C-F}} = 7.9$  Hz), 135.1 (d,  $J_{\text{C-F}} = 8.0$  Hz), 124.4, 119.1 (d,  $J_{\text{C-F}} = 6.1$  Hz), 118.8 (d,  $J_{\text{C-F}} = 8.3$  Hz), 115.9 (d,  $J_{\text{C-F}} = 3.4$  Hz), 38.2, 27.6, 22.5, 14.0; HRMS (ESI-TOF,  $m/z$ ): calcd for  $\text{C}_{15}\text{H}_{15}\text{BrFON}_4$  [ $\text{M} + \text{H}$ ] $^+$ , 365.0408; found, 365.0431.

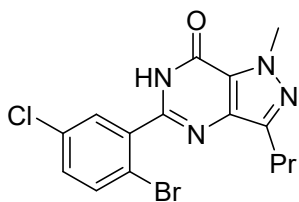

**5-(2-bromo-5-chlorophenyl)-1-methyl-3-propyl-1,6-dihydro-7H-pyrazolo[4,3-d]pyrimidin-7-one (4f)**

White solid; mp 176-177 °C;  $^1\text{H}$  NMR ( $\text{CDCl}_3$ , 400 MHz):  $\delta_{\text{H}}$  11.16 (s, 1H), 7.68 (s, 1H), 7.64–7.61 (m, 1H), 7.36 (d,  $J = 8.4$  Hz, 1H), 4.22 (s, 3H), 2.91 (t,  $J = 7.6$  Hz, 2H), 1.88–1.78 (m, 2H), 1.01 (t,  $J = 7.2$  Hz, 3H);  $^{13}\text{C}$  NMR ( $\text{CDCl}_3$ , 101 MHz):  $\delta_{\text{C}}$  155.1, 148.1, 147.1, 138.4, 136.2, 134.8, 134.0, 131.7, 131.5, 124.4, 119.6, 38.3, 27.6, 22.5, 14.0; HRMS (ESI-TOF,  $m/z$ ): calcd for  $\text{C}_{15}\text{H}_{15}\text{BrClN}_4$  [ $\text{M} + \text{H}$ ] $^+$ , 381.0112; found, 381.0123.

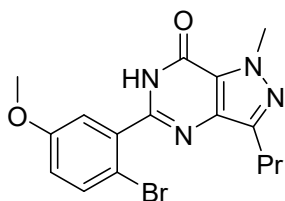

**5-(2-bromo-5-methoxyphenyl)-1-methyl-3-propyl-1,6-dihydro-7H-pyrazolo[4,3-d]pyrimidin-7-one (4g)**

White solid; mp 180-181 °C;  $^1\text{H}$  NMR ( $\text{CDCl}_3$ , 400 MHz):  $\delta_{\text{H}}$  10.71 (s, 1H), 7.55 (d,  $J = 9.2$  Hz, 1H), 7.20 (s, 1H), 6.91 (d,  $J = 8.8$  Hz, 1H), 4.21 (s, 3H), 3.84 (s, 3H), 2.91 (t,  $J = 7.6$  Hz, 2H), 1.88–1.78 (m, 2H), 1.01 (t,  $J = 7.2$  Hz, 3H);  $^{13}\text{C}$  NMR ( $\text{CDCl}_3$ , 101 MHz):  $\delta_{\text{C}}$  159.1, 154.8, 149.3, 146.9, 138.4, 135.5, 134.4, 124.4, 117.9, 116.8, 111.6, 55.7, 38.2, 27.6, 22.5, 14.0; HRMS (ESI-TOF,  $m/z$ ): calcd for  $\text{C}_{16}\text{H}_{18}\text{BrN}_4\text{O}_2$  [ $\text{M} + \text{H}$ ] $^+$ , 377.0608; found, 377.0627.

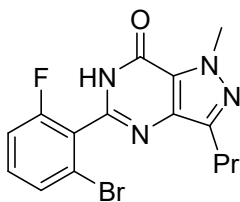

**5-(2-bromo-6-fluorophenyl)-1-methyl-3-propyl-1,6-dihydro-7H-pyrazolo[4,3-d]pyrimidin-7-one (4h)**

White solid; mp 127-130 °C;  $^1\text{H}$  NMR ( $\text{CDCl}_3$ , 400 MHz):  $\delta_{\text{H}}$  11.15 (s, 1H), 7.50 (d,  $J = 8.4$  Hz, 1H), 7.39–7.34 (m, 1H), 7.20–7.16 (m, 1H), 4.17 (s, 3H), 2.90 (t,  $J = 7.6$  Hz, 2H), 1.86–1.78 (m, 2H), 0.99 (t,  $J = 7.6$  Hz, 3H);  $^{13}\text{C}$  NMR ( $\text{CDCl}_3$ , 101 MHz):  $\delta_{\text{C}}$  160.8 (d,  $J_{\text{C-F}} = 252.6$  Hz), 155.4, 147.0, 144.5, 138.4, 132.4 (d,  $J_{\text{C-F}} = 9.0$  Hz), 128.9 (d,  $J_{\text{C-F}} = 3.7$  Hz), 124.6, 124.2 (d,  $J_{\text{C-F}} = 18.3$  Hz), 123.6 (d,  $J_{\text{C-F}} = 2.8$  Hz), 115.2 (d,  $J_{\text{C-F}} = 21.5$  Hz), 38.1, 27.6, 22.6, 13.9; HRMS (ESI-TOF,  $m/z$ ): calcd for  $\text{C}_{15}\text{H}_{15}\text{BrFN}_4$  [ $\text{M} + \text{H}$ ] $^+$ , 365.0408; found, 365.0415.

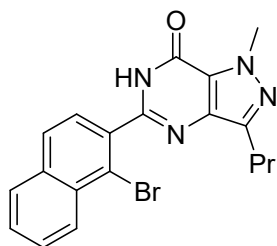

**5-(1-bromonaphthalen-2-yl)-1-methyl-3-propyl-1,6-dihydro-7H-pyrazolo[4,3-*d*]pyrimidin-7-one (4i)**

White solid; mp 207-209 °C;  $^1\text{H}$  NMR ( $\text{CDCl}_3$ , 400 MHz):  $\delta_{\text{H}}$  10.12 (s, 1H), 8.38 (d,  $J = 8.4$  Hz, 1H), 7.95–7.89 (m, 2H), 7.71–7.62 (m, 3H), 4.16 (s, 3H), 2.91 (t,  $J = 7.6$  Hz, 2H), 1.88–1.79 (m, 2H), 1.01 (t,  $J = 7.6$  Hz, 3H);  $^{13}\text{C}$  NMR ( $\text{CDCl}_3$ , 101 MHz):  $\delta_{\text{C}}$  154.4, 150.1, 147.0, 138.5, 134.9, 133.1, 132.1, 128.5, 128.4, 128.4, 128.1, 128.0, 127.0, 124.5, 122.7, 38.2, 27.7, 22.5, 14.0; HRMS (ESI-TOF,  $m/z$ ): calcd for  $\text{C}_{19}\text{H}_{18}\text{BrON}_4$  [ $\text{M} + \text{H}$ ] $^+$ , 397.0659; found, 397.0675.

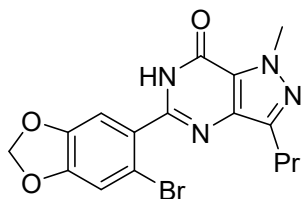

**5-(6-bromobenzo[*d*][1,3]dioxol-5-yl)-1-methyl-3-propyl-1,6-dihydro-7H-pyrazolo[4,3-*d*]pyrimidin-7-one (4j)**

White solid; mp 122-123 °C;  $^1\text{H}$  NMR ( $\text{CDCl}_3$ , 400 MHz):  $\delta_{\text{H}}$  11.39 (s, 1H), 7.99–7.95 (m, 1H), 7.56 (d,  $J = 7.6$  Hz, 1H), 7.50–7.44 (m, 1H), 7.22–7.16 (m, 1H), 4.22–4.16 (m, 3H), 2.93–2.88 (m, 2H), 1.87–1.78 (m, 2H), 1.02–0.97 (m, 3H);  $^{13}\text{C}$  NMR ( $\text{CDCl}_3$ , 101 MHz):  $\delta_{\text{C}}$  155.4, 151.3, 147.0, 140.1, 138.8, 138.4, 131.5, 130.4, 128.3, 124.4, 95.8, 38.2, 27.7, 22.6, 14.0; HRMS (ESI-TOF,  $m/z$ ): calcd for  $\text{C}_{16}\text{H}_{16}\text{BrO}_3\text{N}_4$  [ $\text{M} + \text{H}$ ] $^+$ , 391.0400; found, 391.0419.

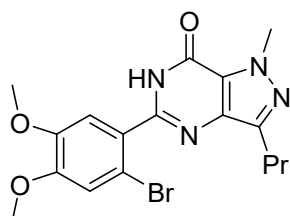

**5-(2-bromo-4,5-dimethoxyphenyl)-1-methyl-3-propyl-1,6-dihydro-7H-pyrazolo[4,3-*d*]pyrimidin-7-one (4k)**

White solid; mp 194-196 °C;  $^1\text{H}$  NMR ( $\text{CDCl}_3$ , 400 MHz):  $\delta_{\text{H}}$  10.20 (s, 1H), 7.21 (s, 1H), 7.10 (s, 1H), 4.24 (s, 3H), 3.94–3.93 (m, 6H), 2.91 (t,  $J = 7.6$  Hz, 2H), 1.89–1.79 (m, 2H), 1.02 (t,  $J = 7.2$

Hz, 3H);  $^{13}\text{C}$  NMR ( $\text{CDCl}_3$ , 101 MHz):  $\delta_{\text{C}}$  154.7, 151.1, 149.3, 148.6, 146.8, 138.5, 126.8, 124.3, 116.0, 113.9, 111.9, 56.4, 56.2, 38.2, 27.6, 22.5, 14.0; HRMS (ESI-TOF,  $m/z$ ): calcd for  $\text{C}_{17}\text{H}_{20}\text{BrO}_3\text{N}_4$  [ $\text{M} + \text{H}$ ] $^+$ , 407.0713; found, 407.0737.

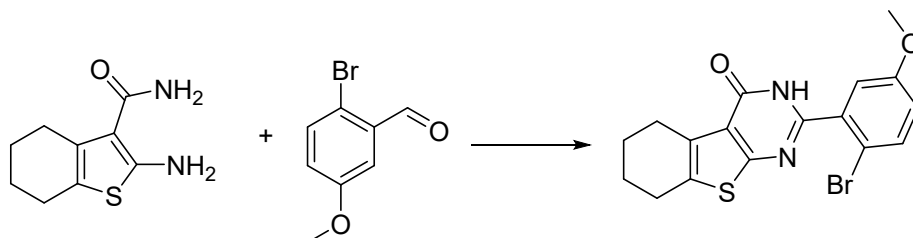

**General procedure for preparation of 2-(2-bromo-5-methoxyphenyl)-5,6,7,8-tetrahydrobenzo[4,5]thieno[2,3-d]pyrimidin-4(3H)-one**

: A mixture of the 2-amino-4,5,6,7-tetrahydrobenzo[*b*]thiophene-3-formamide (0.39 g, 2.0 mmol), the anhydrous ammonium chloride (0.01 g, 0.2 mmol) and the 2-bromo-5-methoxybenzaldehyde (0.43 g, 2.0 mmol) in EtOH (10.0 mL) was prepared in a round-bottom flask (50 mL) equipped with a magnetic stirrer. The resulting mixture was monitored by TLC and stirred for the appropriate time. The resulting mixture was concentrated and the residue was taken up in ethyl acetate. The organic layer was washed with brine, dried over  $\text{Na}_2\text{SO}_4$  and concentrated. Purification of the crude product by column chromatography (silica gel; petroleum ether/ethyl acetate = 3:1) afforded **7**.

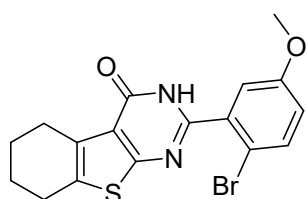

**2-(2-bromo-5-methoxyphenyl)-5,6,7,8-tetrahydrobenzo[4,5]thieno[2,3-d]pyrimidin-4(3H)-one (7)**

Yellow solid; mp 187–189 °C;  $^1\text{H}$  NMR ( $\text{CDCl}_3$ , 400 MHz):  $\delta_{\text{H}}$  11.17 (s, 1H), 7.55 (d,  $J = 9.2$  Hz, 1H), 7.23 (d,  $J = 3.2$  Hz, 1H), 6.93 (dd,  $J = 8.8, 3.2$  Hz, 1H), 3.85 (s, 3H), 2.94 (t,  $J = 6.4$  Hz, 2H), 2.81 (t,  $J = 6.4$  Hz, 2H), 1.93–1.81 (m, 4H);  $^{13}\text{C}$  NMR ( $\text{CDCl}_3$ , 101 MHz):  $\delta_{\text{C}}$  163.6, 159.3, 159.0, 151.3, 134.8, 134.6, 134.5, 131.5, 121.6, 118.4, 116.3, 111.4, 55.7, 25.4, 25.2, 23.0, 22.2; HRMS (ESI-TOF,  $m/z$ ): calcd for  $\text{C}_{17}\text{H}_{16}\text{BrN}_2\text{O}_2\text{S}$  [ $\text{M} + \text{H}$ ] $^+$ , 391.0110; found, 391.0136.

**Note: All ethynylbenzene 2 are commercially available.**

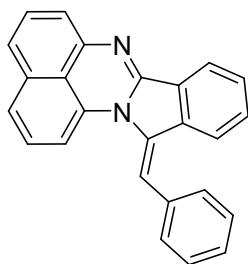

**(E)-12-benzylidene-12H-isoindolo[2,1-a]perimidine (3a)**

To a 10 mL Schlenk tube equipped with a magnetic stir bar was added 2-(2-bromophenyl)-1H-perimidine **1a** (162 mg, 0.5 mmol, 1.0 equiv), ethynylbenzene **2a** (61 mg, 0.6 mmol, 1.2 equiv), DMF (4.0 mL), Cs<sub>2</sub>CO<sub>3</sub> (163 mg, 0.5 mmol, 1.0 equiv), *o*-phen (18 mg, 0.1 mmol, 0.2 equiv), CuI (10 mg, 0.05 mmol, 0.1 equiv). The reaction mixture was stirred at 80 °C in an oil bath for about 12 h. The resulting mixture was concentrated and the residue was taken up in ethyl acetate. The organic layer was washed with brine, dried over Na<sub>2</sub>SO<sub>4</sub> and concentrated. Purification of the crude product by column chromatography (silica gel; petroleum ether/ethyl acetate = 8:1) afforded **3a** in 85% yield (146 mg).

Red solid; mp 191 °C<sup>4</sup>; <sup>1</sup>H NMR (CDCl<sub>3</sub>, 400 MHz): δ<sub>H</sub> 8.09 (d, *J* = 8.0 Hz, 1H), 7.71 (s, 1H), 7.51–7.39 (m, 8H), 7.36–7.27 (m, 4H), 7.25–7.20 (m, 2H); <sup>13</sup>C NMR (CDCl<sub>3</sub>, 101 MHz): δ<sub>C</sub> 152.3, 142.0, 136.7, 135.6, 135.5, 134.9, 131.1, 130.6, 129.5, 129.1, 128.8, 128.5, 127.9, 126.9, 123.1, 122.3, 122.0, 121.6, 121.0, 117.8, 111.6, 105.3; HRMS (ESI-TOF, *m/z*): calcd for C<sub>25</sub>H<sub>17</sub>N<sub>2</sub> [M + H]<sup>+</sup>, 345.1386; found, 345.1376.

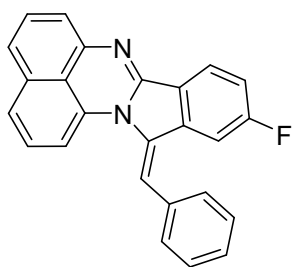

**(E)-12-benzylidene-10-fluoro-12H-isoindolo[2,1-a]perimidine (3b)**

To a 10 mL Schlenk tube equipped with a magnetic stir bar was added 2-(2-bromo-4-fluorophenyl)-1H-perimidine **1b** (170 mg, 0.5 mmol, 1.0 equiv), ethynylbenzene **2a** (61 mg, 0.6 mmol, 1.2 equiv), DMF (4.0 mL), Cs<sub>2</sub>CO<sub>3</sub> (163 mg, 0.5 mmol, 1.0 equiv), *o*-phen (18 mg, 0.1 mmol, 0.2 equiv), CuI (10 mg, 0.05 mmol, 0.1 equiv). The reaction mixture was stirred at 80 °C in an oil bath for about 12 h. The resulting mixture was concentrated and the residue was taken up in ethyl acetate. The organic



layer was washed with brine, dried over Na<sub>2</sub>SO<sub>4</sub> and concentrated. Purification of the crude product by column chromatography (silica gel; petroleum ether/ethyl acetate = 8:1) afforded **3b** in 70% yield (127 mg).

Red solid; mp 164-165 °C; <sup>1</sup>H NMR (CDCl<sub>3</sub>, 400 MHz): δ<sub>H</sub> 8.06 (dd, *J* = 8.4, 5.2 Hz, 1H), 7.72 (s, 1H), 7.52–7.39 (m, 7H), 7.37–7.29 (m, 3H), 7.21–7.15 (m, 2H), 6.87 (d, *J* = 8.4 Hz, 1H); <sup>13</sup>C NMR (CDCl<sub>3</sub>, 101 MHz): δ<sub>C</sub> 164.5 (d, *J*<sub>C-F</sub> = 248.2 Hz), 151.3, 141.8, 136.7 (d, *J*<sub>C-F</sub> = 10.6 Hz), 135.9 (d, *J*<sub>C-F</sub> = 3.6 Hz), 135.4, 134.9, 129.3, 129.0, 128.5, 128.3, 126.9, 126.7 (d, *J*<sub>C-F</sub> = 1.4 Hz), 124.1 (d, *J*<sub>C-F</sub> = 9.7 Hz), 122.2, 121.24, 121.16, 117.9, 117.1 (d, *J*<sub>C-F</sub> = 23.9 Hz), 112.6, 110.1 (d, *J*<sub>C-F</sub> = 26.2 Hz), 105.3; HRMS (ESI-TOF, *m/z*): calcd for C<sub>25</sub>H<sub>16</sub>FN<sub>2</sub> [M + H]<sup>+</sup>, 363.1292; found, 363.1282.

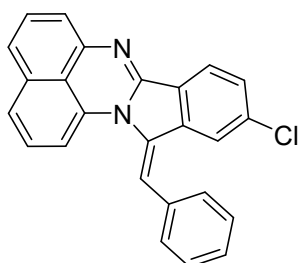

### (*E*)-12-benzylidene-10-chloro-12*H*-isoindolo[2,1-*a*]perimidine (**3c**)

To a 10 mL Schlenk tube equipped with a magnetic stir bar was added 2-(2-bromo-4-chlorophenyl)-1*H*-perimidine **1c** (179 mg, 0.5 mmol, 1.0 equiv), ethynylbenzene **2a** (61 mg, 0.6 mmol, 1.2 equiv), DMF (4.0 mL), Cs<sub>2</sub>CO<sub>3</sub> (163 mg, 0.5 mmol, 1.0 equiv), *o*-phen (18 mg, 0.1 mmol, 0.2 equiv), CuI (10 mg, 0.05 mmol, 0.1 equiv). The reaction mixture was stirred at 80 °C in an oil bath for about 12 h. The resulting mixture was concentrated and the residue was taken up in ethyl acetate. The organic layer was washed with brine, dried over Na<sub>2</sub>SO<sub>4</sub> and concentrated. Purification of the crude product by column chromatography (silica gel; petroleum ether/ethyl acetate = 8:1) afforded **3c** in 76% yield (144 mg).

Red solid; mp 228-230 °C; <sup>1</sup>H NMR (CDCl<sub>3</sub>, 400 MHz): δ<sub>H</sub> 8.00 (d, *J* = 8.4 Hz, 1H), 7.72 (s, 1H), 7.52–7.29 (m, 11H), 7.20–7.17 (m, 2H); <sup>13</sup>C NMR (CDCl<sub>3</sub>, 101 MHz): δ<sub>C</sub> 151.4, 141.8, 137.1, 136.2, 135.7, 135.44, 135.40, 134.8, 129.5, 129.4, 128.99, 128.98, 128.6, 128.3, 126.9, 123.4, 123.3, 122.3, 121.4, 121.2, 118.0, 112.6, 105.3; HRMS (ESI-TOF, *m/z*): calcd for C<sub>25</sub>H<sub>16</sub>ClN<sub>2</sub> [M + H]<sup>+</sup>, 379.0997; found, 379.0981.

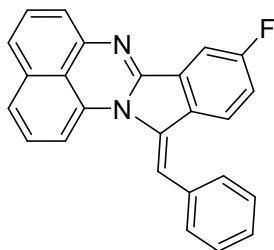

**(E)-12-benzylidene-9-fluoro-12H-isoindolo[2,1-a]perimidine (3d)**

To a 10 mL Schlenk tube equipped with a magnetic stir bar was added 2-(2-bromo-5-fluorophenyl)-1H-perimidine **1d** (170 mg, 0.5 mmol, 1.0 equiv), ethynylbenzene **2a** (61 mg, 0.6 mmol, 1.2 equiv), DMF (4.0 mL), Cs<sub>2</sub>CO<sub>3</sub> (163 mg, 0.5 mmol, 1.0 equiv), *o*-phen (18 mg, 0.1 mmol, 0.2 equiv), CuI (10 mg, 0.05 mmol, 0.1 equiv). The reaction mixture was stirred at 80 °C in an oil bath for about 12 h. The resulting mixture was concentrated and the residue was taken up in ethyl acetate. The organic layer was washed with brine, dried over Na<sub>2</sub>SO<sub>4</sub> and concentrated. Purification of the crude product by column chromatography (silica gel; petroleum ether/ethyl acetate = 8:1) afforded **3d** in 70% yield (127 mg).

Red solid; mp 195–197 °C; <sup>1</sup>H NMR (CDCl<sub>3</sub>, 400 MHz): δ<sub>H</sub> 7.74–7.63 (m, 2H), 7.50–7.28 (m, 10H), 7.20–7.13 (m, 2H), 7.00–6.93 (m, 1H); <sup>13</sup>C NMR (CDCl<sub>3</sub>, 101 MHz): δ<sub>C</sub> 163.1 (d, J<sub>C-F</sub> = 248.7 Hz), 151.4, 141.7, 136.0, 135.5 (d, J<sub>C-F</sub> = 3.8 Hz), 135.3, 132.8 (d, J<sub>C-F</sub> = 9.6 Hz), 130.9, 129.5, 128.9, 128.5, 128.0, 126.9, 125.1 (d, J<sub>C-F</sub> = 8.1 Hz), 122.3, 121.6, 121.1, 118.8 (d, J<sub>C-F</sub> = 23.0 Hz), 118.0, 111.2, 108.7 (d, J<sub>C-F</sub> = 23.9 Hz), 105.3; HRMS (ESI-TOF, *m/z*): calcd for C<sub>25</sub>H<sub>16</sub>FN<sub>2</sub> [M + H]<sup>+</sup>, 363.1292; found, 363.1282.

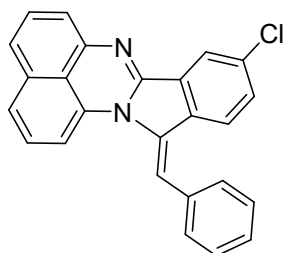

**(E)-12-benzylidene-9-chloro-12H-isoindolo[2,1-a]perimidine (3e)**

To a 10 mL Schlenk tube equipped with a magnetic stir bar was added 2-(2-bromo-5-chlorophenyl)-1H-perimidine **1e** (179 mg, 0.5 mmol, 1.0 equiv), ethynylbenzene **2a** (61 mg, 0.6 mmol, 1.2 equiv), DMF (4.0 mL), Cs<sub>2</sub>CO<sub>3</sub> (163 mg, 0.5 mmol, 1.0 equiv), *o*-phen (18 mg, 0.1 mmol, 0.2 equiv), CuI (10 mg, 0.05 mmol, 0.1 equiv). The reaction mixture was stirred at 80 °C in an oil bath for about 12 h.

The resulting mixture was concentrated and the residue was taken up in ethyl acetate. The organic layer was washed with brine, dried over Na<sub>2</sub>SO<sub>4</sub> and concentrated. Purification of the crude product by column chromatography (silica gel; petroleum ether/ethyl acetate = 8:1) afforded **3e** in 83% yield (157 mg).

Red solid; mp 164-170 °C; <sup>1</sup>H NMR (CDCl<sub>3</sub>, 400 MHz): δ<sub>H</sub> 8.06 (s, 1H), 7.69 (s, 1H), 7.48–7.28 (m, 10H), 7.24–7.19 (m, 2H), 7.13–7.10 (m, 1H); <sup>13</sup>C NMR (CDCl<sub>3</sub>, 101 MHz): δ<sub>C</sub> 151.2, 141.8, 136.0, 135.5, 135.3, 135.2, 133.2, 132.2, 131.3, 129.5, 128.9, 128.6, 128.1, 126.9, 124.4, 122.4, 122.2, 121.6, 121.2, 118.1, 111.9, 105.4; HRMS (ESI-TOF, *m/z*): calcd for C<sub>25</sub>H<sub>16</sub>ClN<sub>2</sub> [M + H]<sup>+</sup>, 379.0997; found, 379.0981.

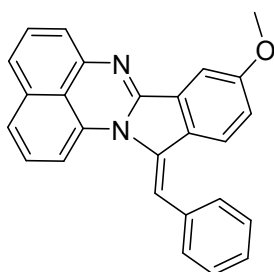

**(E)-12-benzylidene-9-methoxy-12H-isoindolo[2,1-a]perimidine (3f)**

To a 10 mL Schlenk tube equipped with a magnetic stir bar was added 2-(2-bromo-5-methoxyphenyl)-1*H*-perimidine **1f** (176 mg, 0.5 mmol, 1.0 equiv), ethynylbenzene **2a** (61 mg, 0.6 mmol, 1.2 equiv), DMF (4.0 mL), Cs<sub>2</sub>CO<sub>3</sub> (163 mg, 0.5 mmol, 1.0 equiv), *o*-phen (18 mg, 0.1 mmol, 0.2 equiv), CuI (10 mg, 0.05 mmol, 0.1 equiv). The reaction mixture was stirred at 80 °C in an oil bath for about 12 h. The resulting mixture was concentrated and the residue was taken up in ethyl acetate. The organic layer was washed with brine, dried over Na<sub>2</sub>SO<sub>4</sub> and concentrated. Purification of the crude product by column chromatography (silica gel; petroleum ether/ethyl acetate = 8:1) afforded **3f** in 83% yield (155 mg).

Red solid; mp 89-94 °C; <sup>1</sup>H NMR (CDCl<sub>3</sub>, 400 MHz): δ<sub>H</sub> 7.59 (s, 1H), 7.52–7.44 (m, 6H), 7.42–7.38 (m, 2H), 7.35–7.26 (m, 3H), 7.22–7.18 (m, 1H), 7.12 (d, *J* = 8.8 Hz, 1H), 6.84 (dd, *J* = 8.8, 2.0 Hz, 1H), 3.90 (s, 3H); <sup>13</sup>C NMR (CDCl<sub>3</sub>, 101 MHz): δ<sub>C</sub> 160.6, 152.4, 142.0, 136.5, 135.7, 135.6, 135.5, 132.3, 129.6, 128.8, 128.5, 128.0, 127.7, 126.9, 124.4, 122.0, 121.6, 120.8, 120.1, 117.6, 110.1, 105.2, 104.1, 55.8; HRMS (ESI-TOF, *m/z*): calcd for C<sub>26</sub>H<sub>19</sub>N<sub>2</sub>O [M + H]<sup>+</sup>, 375.1492; found, 375.1475.

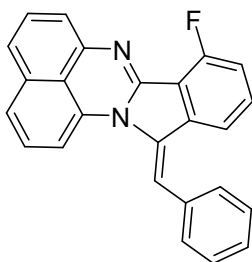

**(E)-12-benzylidene-8-fluoro-12H-isoindolo[2,1-a]perimidine (3g)**

To a 10 mL Schlenk tube equipped with a magnetic stir bar was added 2-(2-bromo-6-fluorophenyl)-1H-perimidine **1g** (170 mg, 0.5 mmol, 1.0 equiv), ethynylbenzene **2a** (61 mg, 0.6 mmol, 1.2 equiv), DMF (4.0 mL), Cs<sub>2</sub>CO<sub>3</sub> (163 mg, 0.5 mmol, 1.0 equiv), *o*-phen (18 mg, 0.1 mmol, 0.2 equiv), CuI (10 mg, 0.05 mmol, 0.1 equiv). The reaction mixture was stirred at 80 °C in an oil bath for about 12 h. The resulting mixture was concentrated and the residue was taken up in ethyl acetate. The organic layer was washed with brine, dried over Na<sub>2</sub>SO<sub>4</sub> and concentrated. Purification of the crude product by column chromatography (silica gel; petroleum ether/ethyl acetate = 8:1) afforded **3g** in 72% yield (130 mg).

Red solid; mp 205-207 °C; <sup>1</sup>H NMR (CDCl<sub>3</sub>, 400 MHz): δ<sub>H</sub> 7.74 (s, 1H), 7.48–7.27 (m, 11H), 7.25–7.21 (m, 1H), 7.13 (t, *J* = 8.8 Hz, 1H), 7.04 (d, *J* = 8.0 Hz, 1H); <sup>13</sup>C NMR (CDCl<sub>3</sub>, 101 MHz): δ<sub>C</sub> 158.3 (d, *J*<sub>C-F</sub> = 259.3 Hz), 150.1, 141.8, 137.4 (d, *J*<sub>C-F</sub> = 1.0 Hz), 136.1, 135.33, 135.29 (d, *J*<sub>C-F</sub> = 3.0 Hz), 132.4 (d, *J*<sub>C-F</sub> = 7.8 Hz), 129.5, 129.0, 128.6, 128.1, 126.8, 122.5, 121.2 (d, *J*<sub>C-F</sub> = 3.0 Hz), 119.20, 119.16, 118.8, 118.1, 118.0, 116.3 (d, *J*<sub>C-F</sub> = 19.1 Hz), 112.0, 105.4; HRMS (ESI-TOF, *m/z*): calcd for C<sub>25</sub>H<sub>16</sub>FN<sub>2</sub> [M + H]<sup>+</sup>, 363.1292; found, 363.1282.

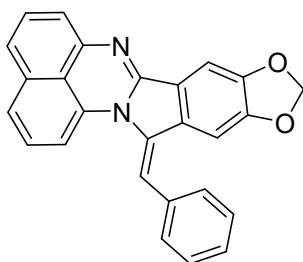

**(E)-13-benzylidene-13H-[1,3]dioxolo[4',5':5,6]isoindolo[2,1-a]perimidine (3h)**

To a 10 mL Schlenk tube equipped with a magnetic stir bar was added 2-(6-bromobenzo[*d*][1,3]dioxol-5-yl)-1H-perimidine **1h** (184 mg, 0.5 mmol, 1.0 equiv), ethynylbenzene **2a** (61 mg, 0.6 mmol, 1.2 equiv), DMF (4.0 mL), Cs<sub>2</sub>CO<sub>3</sub> (163 mg, 0.5 mmol, 1.0 equiv), *o*-phen (18 mg, 0.1 mmol, 0.2 equiv), CuI (10 mg, 0.05 mmol, 0.1 equiv). The reaction mixture was stirred at 80 °C in

an oil bath for about 12 h. The resulting mixture was concentrated and the residue was taken up in ethyl acetate. The organic layer was washed with brine, dried over Na<sub>2</sub>SO<sub>4</sub> and concentrated. Purification of the crude product by column chromatography (silica gel; petroleum ether/ethyl acetate = 8:1) afforded **3h** in 79% yield (153 mg).

Red solid; mp 148-153 °C; <sup>1</sup>H NMR (400 MHz, CDCl<sub>3</sub>) δ 7.62 (s, 1H), 7.47–7.38 (m, 8H), 7.35–7.29 (m, 3H), 7.18 (d, *J* = 7.2 Hz, 1H), 6.58 (s, 1H), 6.00 (s, 2H); <sup>13</sup>C NMR (CDCl<sub>3</sub>, 101 MHz): δ 152.3, 142.1, 136.7, 135.6, 135.5, 134.9, 131.1, 130.6, 129.5, 129.1, 128.8, 128.5, 127.9, 126.9, 123.1, 122.3, 122.0, 121.6, 121.0, 117.8, 111.6, 105.3; HRMS (ESI-TOF, *m/z*): calcd for C<sub>26</sub>H<sub>17</sub>N<sub>2</sub>O<sub>2</sub> [M + H]<sup>+</sup>, 398.1285; found, 389.1266.

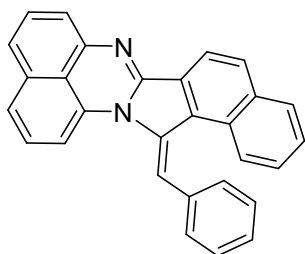

**(E)-14-benzylidene-14H-benzo[5,6]isoindolo[2,1-a]perimidine (3i)**

To a 10 mL Schlenk tube equipped with a magnetic stir bar was added 2-(3-bromonaphthalen-2-yl)-1H-perimidine **1i** (187 mg, 0.5 mmol, 1.0 equiv), ethynylbenzene **2a** (61 mg, 0.6 mmol, 1.2 equiv), DMF (4.0 mL), Cs<sub>2</sub>CO<sub>3</sub> (163 mg, 0.5 mmol, 1.0 equiv), *o*-phen (18 mg, 0.1 mmol, 0.2 equiv), CuI (10 mg, 0.05 mmol, 0.1 equiv). The reaction mixture was stirred at 80 °C in an oil bath for about 12 h. The resulting mixture was concentrated and the residue was taken up in ethyl acetate. The organic layer was washed with brine, dried over Na<sub>2</sub>SO<sub>4</sub> and concentrated. Purification of the crude product by column chromatography (silica gel; petroleum ether/ethyl acetate = 8:1) afforded **3i** in 75% yield (148 mg).

Red solid; mp 227-229 °C; <sup>1</sup>H NMR (CDCl<sub>3</sub>, 400 MHz): δ<sub>H</sub> 8.71 (d, *J* = 8.4 Hz, 1H), 8.18 (d, *J* = 8.4 Hz, 1H), 8.02–7.96 (m, 2H), 7.56–7.72 (m, 1H), 7.64 (t, *J* = 7.6 Hz, 1H), 7.59 (s, 1H), 7.48–7.35 (m, 3H), 7.25–7.18 (m, 4H), 7.08–7.06 (m, 2H), 6.83 (t, *J* = 8.0 Hz, 1H), 5.65 (d, *J* = 7.6 Hz, 1H); <sup>13</sup>C NMR (CDCl<sub>3</sub>, 101 MHz): δ<sub>C</sub> 153.6, 142.1, 136.0, 135.7, 135.2, 134.8, 134.5, 132.4, 130.2, 130.1, 130.0, 128.2, 127.9, 127.8, 127.6, 127.3, 126.4, 125.8, 124.2, 122.4, 120.0, 119.9, 118.9, 118.0, 113.9, 110.0; HRMS (ESI-TOF, *m/z*): calcd for C<sub>29</sub>H<sub>19</sub>N<sub>2</sub> [M + H]<sup>+</sup>, 395.1543; found, 395.1525.

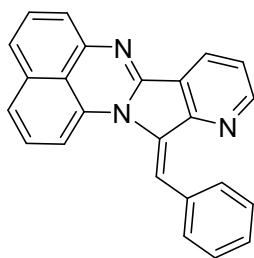

**(E)-12-benzylidene-12H-pyrido[3',2':3,4]pyrrolo[1,2-a]perimidine (3j)**

To a 10 mL Schlenk tube equipped with a magnetic stir bar was added 2-(2-bromopyridin-3-yl)-1H-perimidine **1j** (162 mg, 0.5 mmol, 1.0 equiv), ethynylbenzene **2a** (61 mg, 0.6 mmol, 1.2 equiv), DMF (4.0 mL), Cs<sub>2</sub>CO<sub>3</sub> (163 mg, 0.5 mmol, 1.0 equiv), *o*-phen (18 mg, 0.1 mmol, 0.2 equiv), CuI (10 mg, 0.05 mmol, 0.1 equiv). The reaction mixture was stirred at 80 °C in an oil bath for about 12 h. The resulting mixture was concentrated and the residue was taken up in ethyl acetate. The organic layer was washed with brine, dried over Na<sub>2</sub>SO<sub>4</sub> and concentrated. Purification of the crude product by column chromatography (silica gel; petroleum ether/ethyl acetate = 8:1) afforded **3j** in 82% yield (142 mg).

Red solid; mp 172-174 °C; <sup>1</sup>H NMR (CDCl<sub>3</sub>, 400 MHz): δ<sub>H</sub> 8.70 (d, *J* = 4.8 Hz, 1H), 8.35 (d, *J* = 6.4 Hz, 1H), 7.90–7.88 (m, 2H), 7.76 (s, 1H), 7.51 (d, *J* = 7.2 Hz, 1H), 7.45–7.26 (m, 8H), 7.17 (d, *J* = 7.2 Hz, 1H); <sup>13</sup>C NMR (CDCl<sub>3</sub>, 101 MHz): 153.7, 152.6, 150.1, 141.7, 135.5, 135.2, 134.5, 133.8, 131.1, 130.0, 128.5, 128.0, 127.7, 126.9, 124.1, 123.6, 122.4, 121.9, 121.2, 117.9, 114.5, 105.5; HRMS (ESI-TOF, *m/z*): calcd for C<sub>24</sub>H<sub>16</sub>N<sub>3</sub> [M + H]<sup>+</sup>, 346.1339; found, 346.1322.

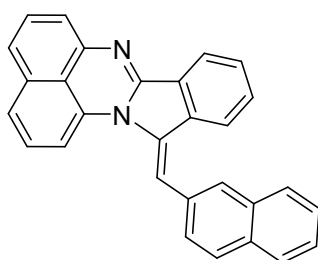

**(E)-12-(naphthalen-1-ylmethylene)-12H-isoindolo[2,1-a]perimidine (3k)**

To a 10 mL Schlenk tube equipped with a magnetic stir bar was added 2-(2-bromophenyl)-1H-perimidine **1a** (162 mg, 0.5 mmol, 1.0 equiv), 1-ethynyl-naphthalene **2u** (91 mg, 0.6 mmol, 1.2 equiv), DMF (4.0 mL), Cs<sub>2</sub>CO<sub>3</sub> (163 mg, 0.5 mmol, 1.0 equiv), *o*-phen (18 mg, 0.1 mmol, 0.2 equiv), CuI (10 mg, 0.05 mmol, 0.1 equiv). The reaction mixture was stirred at 80 °C in an oil bath for about 12 h. The resulting mixture was concentrated and the residue was taken up in ethyl acetate. The organic

layer was washed with brine, dried over Na<sub>2</sub>SO<sub>4</sub> and concentrated. Purification of the crude product by column chromatography (silica gel; petroleum ether/ethyl acetate = 8:1) afforded **3k** in 78% yield (154 mg).

Red solid; mp 221-223 °C; <sup>1</sup>H NMR (CDCl<sub>3</sub>, 400 MHz): δ<sub>H</sub> 8.11 (d, *J* = 7.6 Hz, 1H), 8.01 (s, 1H), 7.96–7.92 (m, 2H), 7.88–7.84 (m, 2H), 7.60–7.53 (m, 4H), 7.48–7.31 (m, 6H), 7.26–7.21 (m, 2H); <sup>13</sup>C NMR (CDCl<sub>3</sub>, 101 MHz): δ<sub>C</sub> 152.3, 142.0, 136.8, 135.6, 135.5, 134.9, 133.4, 132.9, 132.8, 131.2, 130.6, 129.2, 128.6, 128.5, 128.4, 128.0, 127.9, 127.5, 126.9, 126.6, 126.4, 123.1, 122.3, 122.1, 121.6, 121.1, 117.9, 111.7, 105.3; HRMS (ESI-TOF, *m/z*): calcd for C<sub>29</sub>H<sub>19</sub>N<sub>2</sub> [M + H]<sup>+</sup>, 395.1543; found, 395.1525.

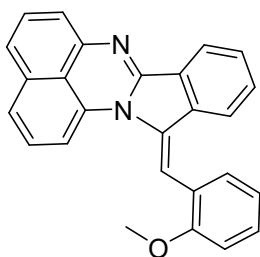

**(E)-12-(2-methoxybenzylidene)-12H-isoindolo[2,1-a]perimidine (3l)**

To a 10 mL Schlenk tube equipped with a magnetic stir bar was added 2-(2-bromophenyl)-1H-perimidine **1a** (162 mg, 0.5 mmol, 1.0 equiv), 1-ethynyl-2-methoxybenzene **2e** (79 mg, 0.6 mmol, 1.2 equiv), DMF (4.0 mL), Cs<sub>2</sub>CO<sub>3</sub> (163 mg, 0.5 mmol, 1.0 equiv), *o*-phen (18 mg, 0.1 mmol, 0.2 equiv), CuI (10 mg, 0.05 mmol, 0.1 equiv). The reaction mixture was stirred at 80 °C in an oil bath for about 12 h. The resulting mixture was concentrated and the residue was taken up in ethyl acetate. The organic layer was washed with brine, dried over Na<sub>2</sub>SO<sub>4</sub> and concentrated. Purification of the crude product by column chromatography (silica gel; petroleum ether/ethyl acetate = 8:1) afforded **3l** in 75% yield (140 mg).

Red solid; mp 203-205 °C; <sup>1</sup>H NMR (CDCl<sub>3</sub>, 400 MHz): δ<sub>H</sub> 8.08 (d, *J* = 7.6 Hz, 1H), 7.64 (s, 1H), 7.60–7.53 (m, 2H), 7.48–7.27 (m, 8H), 7.19 (d, *J* = 7.2 Hz, 1H), 7.08–6.99 (m, 2H), 3.84 (s, 3H); <sup>13</sup>C NMR (CDCl<sub>3</sub>, 101 MHz): δ<sub>C</sub> 157.1, 152.4, 142.2, 136.1, 135.7, 135.5, 135.1, 131.8, 131.1, 130.5, 129.7, 128.9, 128.5, 126.9, 123.9, 122.9, 122.2, 121.8, 121.7, 120.8, 120.5, 117.5, 110.8, 108.8, 105.3, 55.5; HRMS (ESI-TOF, *m/z*): calcd for C<sub>26</sub>H<sub>19</sub>N<sub>2</sub>O [M + H]<sup>+</sup>, 375.1492; found, 375.1475.

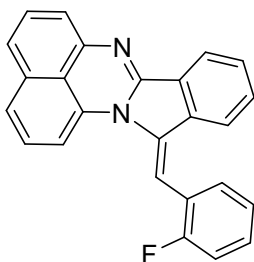

**(E)-12-(2-fluorobenzylidene)-12H-isoindolo[2,1-a]perimidin-12-ylidene (3m)**

To a 10 mL Schlenk tube equipped with a magnetic stir bar was added 2-(2-bromophenyl)-1H-perimidine **1a** (162 mg, 0.5 mmol, 1.0 equiv), 1-ethynyl-2-fluorobenzene **2b** (72 mg, 0.6 mmol, 1.2 equiv), DMF (4.0 mL), Cs<sub>2</sub>CO<sub>3</sub> (163 mg, 0.5 mmol, 1.0 equiv), *o*-phen (18 mg, 0.1 mmol, 0.2 equiv), CuI (10 mg, 0.05 mmol, 0.1 equiv). The reaction mixture was stirred at 80 °C in an oil bath for about 12 h. The resulting mixture was concentrated and the residue was taken up in ethyl acetate. The organic layer was washed with brine, dried over Na<sub>2</sub>SO<sub>4</sub> and concentrated. Purification of the crude product by column chromatography (silica gel; petroleum ether/ethyl acetate = 8:1) afforded **3m** in 75% yield (136 mg).

Red solid; mp 127-130 °C; <sup>1</sup>H NMR (CDCl<sub>3</sub>, 400 MHz): δ<sub>H</sub> 8.10 (d, *J* = 7.6 Hz, 1H), 7.56 (t, *J* = 7.6 Hz, 1H), 7.52–7.47 (m, 3H), 7.45–7.28 (m, 7H), 7.26–7.19 (m, 3H); <sup>13</sup>C NMR (CDCl<sub>3</sub>, 101 MHz): δ<sub>C</sub> 160.2 (d, *J*<sub>C-F</sub> = 246.3 Hz), 152.1, 141.8, 137.7, 135.4, 134.7, 132.0 (d, *J*<sub>C-F</sub> = 2.8 Hz), 131.2, 130.7, 130.0 (d, *J*<sub>C-F</sub> = 8.2 Hz), 129.3, 128.5, 126.9, 124.3, 124.2, 123.2 (d, *J*<sub>C-F</sub> = 15.8 Hz), 122.8, 122.3 (d, *J*<sub>C-F</sub> = 9.1 Hz), 121.5, 121.1, 118.0, 116.0 (d, *J*<sub>C-F</sub> = 21.5 Hz), 105.5, 103.7; HRMS (ESI-TOF, *m/z*): calcd for C<sub>25</sub>H<sub>16</sub>FN<sub>2</sub> [M + H]<sup>+</sup>, 363.1292; found, 363.1282.

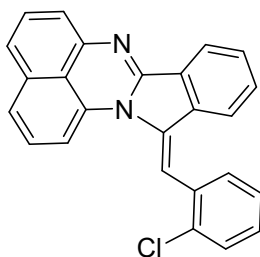

**(E)-12-(2-chlorobenzylidene)-12H-isoindolo[2,1-a]perimidin-12-ylidene (3n)**

To a 10 mL Schlenk tube equipped with a magnetic stir bar was added 2-(2-bromophenyl)-1H-perimidine **1a** (162 mg, 0.5 mmol, 1.0 equiv), 1-chloro-2-ethynylbenzene **2c** (82 mg, 0.6 mmol, 1.2 equiv), DMF (4.0 mL), Cs<sub>2</sub>CO<sub>3</sub> (163 mg, 0.5 mmol, 1.0 equiv), *o*-phen (18 mg, 0.1 mmol, 0.2 equiv), CuI (10 mg, 0.05 mmol, 0.1 equiv). The reaction mixture was stirred at 80 °C in an oil bath for about



12 h. The resulting mixture was concentrated and the residue was taken up in ethyl acetate. The organic layer was washed with brine, dried over Na<sub>2</sub>SO<sub>4</sub> and concentrated. Purification of the crude product by column chromatography (silica gel; petroleum ether/ethyl acetate = 8:1) afforded **3n** in 82% yield (155 mg).

Red solid; mp 184-186 °C; <sup>1</sup>H NMR (CDCl<sub>3</sub>, 400 MHz): δ<sub>H</sub> 8.11 (d, *J* = 7.6 Hz, 1H), 7.63–7.52 (m, 4H), 7.51–7.47 (m, 1H), 7.44–7.29 (m, 7H), 7.23 (d, *J* = 7.2 Hz, 1H), 7.13 (d, *J* = 8.0 Hz, 1H); <sup>13</sup>C NMR (CDCl<sub>3</sub>, 101 MHz): δ<sub>C</sub> 152.2, 141.9, 137.2, 135.4, 134.7, 134.2, 134.1, 131.9, 131.2, 130.8, 129.9, 129.5, 129.3, 128.5, 127.0, 126.9, 123.0, 122.4, 122.3, 121.5, 121.1, 118.0, 108.1, 105.5; HRMS (ESI-TOF, *m/z*): calcd for C<sub>25</sub>H<sub>16</sub>ClN<sub>2</sub> [M + H]<sup>+</sup>, 379.0997; found, 379.0981.

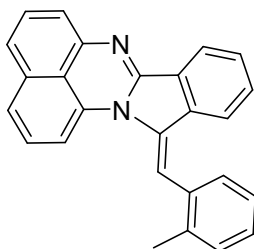

**(E)-12-(2-methylbenzylidene)-12H-isoindolo[2,1-a]perimidine (3o)**

To a 10 mL Schlenk tube equipped with a magnetic stir bar was added 2-(2-bromophenyl)-1H-perimidine **1a** (162 mg, 0.5 mmol, 1.0 equiv), 1-ethynyl-2-methylbenzene **2d** (70 mg, 0.6 mmol, 1.2 equiv), DMF (4.0 mL), Cs<sub>2</sub>CO<sub>3</sub> (163 mg, 0.5 mmol, 1.0 equiv), *o*-phen (18 mg, 0.1 mmol, 0.2 equiv), CuI (10 mg, 0.05 mmol, 0.10 equiv). The reaction mixture was stirred at 80 °C in an oil bath for about 12 h. The resulting mixture was concentrated and the residue was taken up in ethyl acetate. The organic layer was washed with brine, dried over Na<sub>2</sub>SO<sub>4</sub> and concentrated. Purification of the crude product by column chromatography (silica gel; petroleum ether/ethyl acetate = 8:1) afforded **3o** in 79% yield (142 mg).

Red solid; mp 160-163 °C; <sup>1</sup>H NMR (CDCl<sub>3</sub>, 400 MHz): δ<sub>H</sub> 8.09 (d, *J* = 7.6 Hz, 1H), 7.62 (s, 1H), 7.50–7.25 (m, 11H), 7.23–7.20 (m, 1H), 6.92 (d, *J* = 8.0 Hz, 1H), 2.32 (s, 3H); <sup>13</sup>C NMR (CDCl<sub>3</sub>, 101 MHz): δ<sub>C</sub> 152.4, 142.1, 136.7, 136.6, 135.7, 135.5, 135.1, 134.6, 131.3, 130.5, 130.4, 130.2, 129.0, 128.5, 128.3, 126.9, 126.2, 123.1, 122.2, 122.0, 121.6, 120.9, 117.7, 110.7, 105.1, 20.4; HRMS (ESI-TOF, *m/z*): calcd for C<sub>26</sub>H<sub>19</sub>N<sub>2</sub> [M + H]<sup>+</sup>, 359.1543; found, 359.1527.

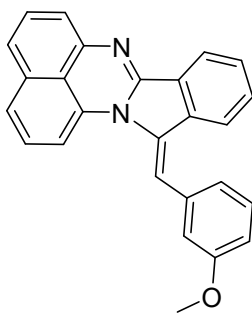

**(E)-12-(3-methoxybenzylidene)-12H-isoindolo[2,1-a]perimidin-12-ylidene (3p)**

To a 10 mL Schlenk tube equipped with a magnetic stir bar was added 2-(2-bromophenyl)-1H-perimidine **1a** (162 mg, 0.5 mmol, 1.0 equiv), 1-ethynyl-3-methoxybenzene **2i** (79 mg, 0.6 mmol, 1.2 equiv), DMF (4.0 mL), Cs<sub>2</sub>CO<sub>3</sub> (163 mg, 0.5 mmol, 1.0 equiv), *o*-phen (18 mg, 0.1 mmol, 0.2 equiv), CuI (10 mg, 0.05 mmol, 0.1 equiv). The reaction mixture was stirred at 80 °C in an oil bath for about 12 h. The resulting mixture was concentrated and the residue was taken up in ethyl acetate. The organic layer was washed with brine, dried over Na<sub>2</sub>SO<sub>4</sub> and concentrated. Purification of the crude product by column chromatography (silica gel; petroleum ether/ethyl acetate = 8:1) afforded **3p** in 82% yield (154 mg).

Red solid; mp 158-160 °C; <sup>1</sup>H NMR (CDCl<sub>3</sub>, 400 MHz): δ<sub>H</sub> 8.09 (d, *J* = 7.6 Hz, 1H), 7.68 (s, 1H), 7.49–7.45 (m, 2H), 7.43–7.37 (m, 3H), 7.35–7.29 (m, 4H), 7.21 (d, *J* = 7.6 Hz, 1H), 7.10 (d, *J* = 7.6 Hz, 1H), 7.02 (s, 1H), 6.96 (dd, *J* = 8.4, 2.8 Hz, 1H), 3.85 (s, 3H); <sup>13</sup>C NMR (CDCl<sub>3</sub>, 101 MHz): δ<sub>C</sub> 159.9, 152.3, 142.0, 136.8, 135.6, 135.5, 134.9, 131.2, 130.6, 129.9, 129.1, 128.5, 126.9, 123.3, 122.3, 122.1, 121.9, 121.6, 121.0, 117.8, 114.5, 113.8, 111.4, 105.3, 55.3; HRMS (ESI-TOF, *m/z*): calcd for C<sub>26</sub>H<sub>19</sub>N<sub>2</sub>O [M + H]<sup>+</sup>, 375.1492; found, 375.1475.

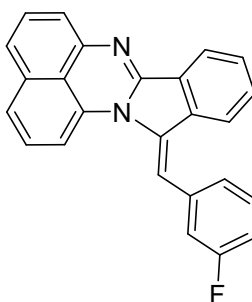

**(E)-12-(3-fluorobenzylidene)-12H-isoindolo[2,1-a]perimidin-12-ylidene (3q)**

To a 10 mL Schlenk tube equipped with a magnetic stir bar was added 2-(2-bromophenyl)-1H-perimidine **1a** (162 mg, 0.5 mmol, 1.0 equiv), 1-ethynyl-3-fluorobenzene **2f** (72 mg, 0.6 mmol, 1.2 equiv), DMF (4.0 mL), Cs<sub>2</sub>CO<sub>3</sub> (163 mg, 0.5 mmol, 1.0 equiv), *o*-phen (18 mg, 0.1 mmol, 0.2 equiv),

CuI (10 mg, 0.05 mmol, 0.1 equiv). The reaction mixture was stirred at 80 °C in an oil bath for about 12 h. The resulting mixture was concentrated and the residue was taken up in ethyl acetate. The organic layer was washed with brine, dried over Na<sub>2</sub>SO<sub>4</sub> and concentrated. Purification of the crude product by column chromatography (silica gel; petroleum ether/ethyl acetate = 8:1) afforded **3q** in 76% yield (138 mg).

Red solid; mp 146-149 °C; <sup>1</sup>H NMR (CDCl<sub>3</sub>, 400 MHz): δ<sub>H</sub> 8.11 (d, *J* = 7.6 Hz, 1H), 7.63 (s, 1H), 7.52–7.26 (m, 10H), 7.24–7.19 (m, 2H), 7.15–7.10 (m, 1H); <sup>13</sup>C NMR (CDCl<sub>3</sub>, 101 MHz): δ<sub>C</sub> 163.0 (d, *J*<sub>C-F</sub> = 245.8 Hz), 152.1, 141.8, 137.7 (d, *J*<sub>C-F</sub> = 8.0 Hz), 137.3, 135.4, 134.6, 131.2, 130.7, 130.4 (d, *J*<sub>C-F</sub> = 8.5 Hz), 129.4, 128.6, 126.9, 125.4 (d, *J*<sub>C-F</sub> = 2.9 Hz), 123.1, 122.4, 122.3, 121.5, 121.2, 118.0, 116.4 (d, *J*<sub>C-F</sub> = 21.5 Hz), 114.8 (d, *J*<sub>C-F</sub> = 20.8 Hz), 109.780, 109.775, 105.4; HRMS (ESI-TOF, *m/z*): calcd for C<sub>25</sub>H<sub>16</sub>FN<sub>2</sub> [M + H]<sup>+</sup>, 363.1292; found, 363.1282.

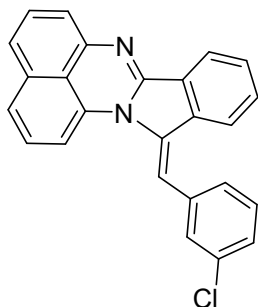

**(E)-12-(3-chlorobenzylidene)-12H-isoindolo[2,1-a]perimidine (3r)**

To a 10 mL Schlenk tube equipped with a magnetic stir bar was added 2-(2-bromophenyl)-1H-perimidine **1a** (162 mg, 0.5 mmol, 1.0 equiv), 1-chloro-3-ethynylbenzene **2g** (82 mg, 0.6 mmol, 1.2 equiv), DMF (4.0 mL), Cs<sub>2</sub>CO<sub>3</sub> (163 mg, 0.5 mmol, 1.0 equiv), *o*-phen (18 mg, 0.1 mmol, 0.2 equiv), CuI (10 mg, 0.05 mmol, 0.1 equiv). The reaction mixture was stirred at 80 °C in an oil bath for about 12 h. The resulting mixture was concentrated and the residue was taken up in ethyl acetate. The organic layer was washed with brine, dried over Na<sub>2</sub>SO<sub>4</sub> and concentrated. Purification of the crude product by column chromatography (silica gel; petroleum ether/ethyl acetate = 8:1) afforded **3r** in 76% yield (144 mg).

Red solid; mp 94-96 °C; <sup>1</sup>H NMR (CDCl<sub>3</sub>, 400 MHz): δ<sub>H</sub> 8.11 (d, *J* = 7.6 Hz, 1H), 7.60 (s, 1H), 7.52–7.29 (m, 11H), 7.26–7.22 (m, 2H); <sup>13</sup>C NMR (CDCl<sub>3</sub>, 101 MHz): δ<sub>C</sub> 152.1, 141.8, 137.4, 137.3, 135.39, 135.36, 134.7, 134.6, 131.2, 130.7, 130.1, 129.5, 129.4, 128.5, 127.9, 127.8,

126.8, 123.0, 122.4, 122.3, 121.4, 121.2, 118.1, 109.5, 105.4; HRMS (ESI-TOF,  $m/z$ ): calcd for  $C_{25}H_{16}ClN_2$  [ $M + H$ ] $^+$ , 379.0997; found, 379.0981.

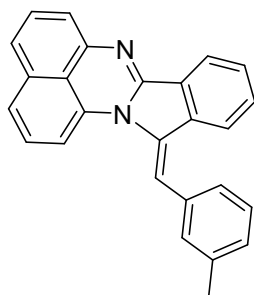

**(E)-12-(3-methylbenzylidene)-12H-isoindolo[2,1-a]perimidine (3s)**

To a 10 mL Schlenk tube equipped with a magnetic stir bar was added 2-(2-bromophenyl)-1H-perimidine **1a** (162 mg, 0.5 mmol, 1.0 equiv), 1-ethynyl-3-methylbenzene **2h** (70 mg, 0.6 mmol, 1.2 equiv), DMF (4.0 mL),  $Cs_2CO_3$  (163 mg, 0.5 mmol, 1.0 equiv), *o*-phen (18 mg, 0.1 mmol, 0.2 equiv), CuI (10 mg, 0.05 mmol, 0.1 equiv). The reaction mixture was stirred at 80 °C in an oil bath for about 12 h. The resulting mixture was concentrated and the residue was taken up in ethyl acetate. The organic layer was washed with brine, dried over  $Na_2SO_4$  and concentrated. Purification of the crude product by column chromatography (silica gel; petroleum ether/ethyl acetate = 8:1) afforded **3s** in 80% yield (143 mg).

Red solid; mp 156-158 °C;  $^1H$  NMR ( $CDCl_3$ , 400 MHz):  $\delta_H$  8.09 (d,  $J = 7.6$  Hz, 1H), 7.68 (s, 1H), 7.50–7.26 (m, 11H), 7.24–7.20 (m, 2H), 2.42 (s, 3H);  $^{13}C$  NMR ( $CDCl_3$ , 101 MHz):  $\delta_C$  152.4, 142.1, 136.7, 136.6, 135.7, 135.5, 135.1, 134.6, 131.3, 130.5, 130.4, 130.2, 129.0, 128.5, 128.3, 126.9, 126.2, 123.1, 122.2, 122.0, 121.6, 120.9, 117.7, 110.7, 105.1, 20.4; HRMS (ESI-TOF,  $m/z$ ): calcd for  $C_{26}H_{19}N_2$  [ $M + H$ ] $^+$ , 359.1543; found, 359.1527.

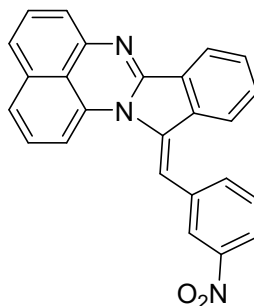

**(E)-12-(3-nitrobenzylidene)-12H-isoindolo[2,1-a]perimidine (3t)**

To a 10 mL Schlenk tube equipped with a magnetic stir bar was added 2-(2-bromophenyl)-1H-perimidine **1a** (162 mg, 0.5 mmol, 1.0 equiv), 1-ethynyl-3-nitrobenzene **2j** (88 mg, 0.6 mmol, 1.2

equiv), DMF (4.0 mL), Cs<sub>2</sub>CO<sub>3</sub> (163 mg, 0.5 mmol, 1.0 equiv), *o*-phen (18 mg, 0.1 mmol, 0.2 equiv), CuI (10 mg, 0.05 mmol, 0.1 equiv). The reaction mixture was stirred at 80 °C in an oil bath for about 12 h. The resulting mixture was concentrated and the residue was taken up in ethyl acetate. The organic layer was washed with brine, dried over Na<sub>2</sub>SO<sub>4</sub> and concentrated. Purification of the crude product by column chromatography (silica gel; petroleum ether/ethyl acetate = 8:1) afforded **3t** in 77% yield (150 mg).

Red solid; mp 158-161 °C; <sup>1</sup>H NMR (CDCl<sub>3</sub>, 400 MHz): δ<sub>H</sub> 8.39 (s, 1H), 8.27 (dd, *J* = 8.4, 2.4 Hz, 1H), 8.12 (d, *J* = 7.6 Hz, 1H), 7.85 (d, *J* = 7.6 Hz, 1H), 7.68–7.62 (m, 2H), 7.53–7.30 (m, 7H), 7.25 (d, *J* = 8.0 Hz, 1H), 7.14 (d, *J* = 8.0 Hz, 1H); <sup>13</sup>C NMR (CDCl<sub>3</sub>, 101 MHz): δ<sub>C</sub> 151.9, 148.6, 141.5, 138.1, 137.5, 135.8, 135.4, 135.2, 134.2, 131.3, 130.9, 129.79, 129.76, 128.6, 126.8, 124.6, 122.7, 122.6, 121.4, 121.3, 118.4, 107.7, 105.6; HRMS (ESI-TOF, *m/z*): calcd for C<sub>25</sub>H<sub>16</sub>N<sub>3</sub>O<sub>2</sub> [M + H]<sup>+</sup>, 390.1237; found, 390.1264.

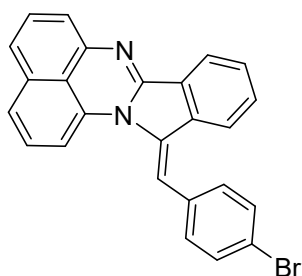

**(E)-12-(4-bromobenzylidene)-12H-isoindolo[2,1-a]perimidine (3u)**

To a 10 mL Schlenk tube equipped with a magnetic stir bar was added 2-(2-bromophenyl)-1H-perimidine **1a** (162 mg, 0.5 mmol, 1.0 equiv), 1-bromo-4-ethynylbenzene **2m** (109 mg, 0.6 mmol, 1.2 equiv), DMF (4.0 mL), Cs<sub>2</sub>CO<sub>3</sub> (163 mg, 0.5 mmol, 1.0 equiv), *o*-phen (18 mg, 0.1 mmol, 0.2 equiv), CuI (10 mg, 0.05 mmol, 0.1 equiv). The reaction mixture was stirred at 80 °C in an oil bath for about 12 h. The resulting mixture was concentrated and the residue was taken up in ethyl acetate. The organic layer was washed with brine, dried over Na<sub>2</sub>SO<sub>4</sub> and concentrated. Purification of the crude product by column chromatography (silica gel; petroleum ether/ethyl acetate = 8:1) afforded **3u** in 79% yield (167 mg).

Red solid; mp 214-217 °C; <sup>1</sup>H NMR (CDCl<sub>3</sub>, 400 MHz): δ<sub>H</sub> 8.09 (d, *J* = 7.6 Hz, 1H), 7.61–7.56 (m, 3H), 7.50–7.36 (m, 7H), 7.33–7.27 (m, 3H), 7.25–7.21 (m, 1H); <sup>13</sup>C NMR (CDCl<sub>3</sub>, 101 MHz): δ<sub>C</sub> 152.1, 141.9, 137.1, 135.4, 134.7, 134.5, 133.8, 132.0, 131.8, 131.3, 130.7, 129.3, 128.6,

126.9, 123.0, 122.4, 122.2, 121.9, 121.5, 121.2, 118.0, 109.9, 105.4; HRMS (ESI-TOF,  $m/z$ ): calcd for  $C_{25}H_{16}BrN_2$   $[M + H]^+$ , 423.0491; found, 423.0470.

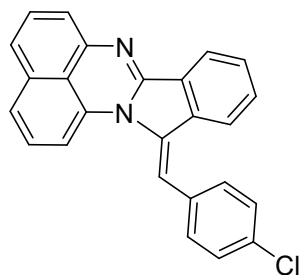

**(E)-12-(4-chlorobenzylidene)-12H-isoindolo[2,1-a]perimidine (3v)**

To a 10 mL Schlenk tube equipped with a magnetic stir bar was added 2-(2-bromophenyl)-1H-perimidine **1a** (162 mg, 0.5 mmol, 1.0 equiv), 1-chloro-4-ethynylbenzene **2l** (82 mg, 0.6 mmol, 1.2 equiv), DMF (4.0 mL),  $Cs_2CO_3$  (163 mg, 0.5 mmol, 1.0 equiv), *o*-phen (18 mg, 0.1 mmol, 0.2 equiv), CuI (10 mg, 0.05 mmol, 0.1 equiv). The reaction mixture was stirred at 80 °C in an oil bath for about 12 h. The resulting mixture was concentrated and the residue was taken up in ethyl acetate. The organic layer was washed with brine, dried over  $Na_2SO_4$  and concentrated. Purification of the crude product by column chromatography (silica gel; petroleum ether/ethyl acetate = 8:1) afforded **3v** in 80% yield (152 mg).

Red solid; mp 198–201 °C;  $^1H$  NMR ( $CDCl_3$ , 400 MHz):  $\delta_H$  8.10 (d,  $J = 7.6$  Hz, 1H), 7.60 (s, 1H), 7.51–7.44 (m, 6H), 7.41–7.29 (m, 6H), 7.24–7.21 (m, 1H);  $^{13}C$  NMR ( $CDCl_3$ , 101 MHz):  $\delta_C$  152.1, 141.9, 137.1, 135.5, 135.4, 134.7, 134.0, 133.8, 133.7, 131.2, 130.9, 130.7, 129.3, 129.1, 128.9, 128.6, 126.9, 123.0, 122.4, 122.2, 121.5, 121.1, 118.0, 109.9, 105.3; HRMS (ESI-TOF,  $m/z$ ): calcd for  $C_{25}H_{16}ClN_2$   $[M + H]^+$ , 379.0997; found, 379.0981.

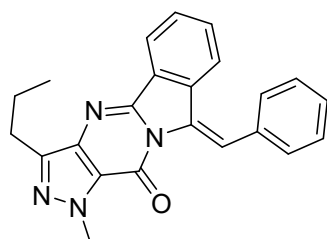

**(E)-9-benzylidene-1-methyl-3-propyl-1,9-dihydro-11H-pyrazolo[4',3':4,5]pyrimido[2,1-a]isoindol-11-one (5a)**

To a 10 mL Schlenk tube equipped with a magnetic stir bar was added 5-(2-bromophenyl)-1-methyl-3-propyl-1,6-dihydro-7H-pyrazolo[4,3-d]pyrimidin-7-one **4a** (174 mg, 0.5 mmol, 1.0 equiv), ethynylbenzene **2a** (61 mg, 0.6 mmol, 1.2 equiv), DMF (4.0 mL),  $Cs_2CO_3$  (163 mg, 0.5 mmol, 1.0

equiv), *o*-phen (18 mg, 0.1 mmol, 0.2 equiv), CuI (10 mg, 0.05 mmol, 0.1 equiv). The reaction mixture was stirred at 80 °C in an oil bath for about 12 h. The resulting mixture was concentrated and the residue was taken up in ethyl acetate. The organic layer was washed with brine, dried over Na<sub>2</sub>SO<sub>4</sub> and concentrated. Purification of the crude product by column chromatography (silica gel; petroleum ether/ethyl acetate = 13:1) afforded **5a** in 27% yield (50 mg).

Yellow solid; mp 193–194 °C; <sup>1</sup>H NMR (CDCl<sub>3</sub>, 400 MHz): δ<sub>H</sub> 9.08 (s, 1H), 8.11 (d, *J* = 7.6 Hz, 1H), 7.51–7.40 (m, 6H), 7.28–7.24 (m, 1H), 7.22–7.19 (m, 1H), 4.35 (s, 3H), 2.96 (t, *J* = 7.6 Hz, 2H), 1.94–1.85 (m, 2H), 1.05 (t, *J* = 7.6 Hz, 3H); <sup>13</sup>C NMR (CDCl<sub>3</sub>, 101 MHz) δ<sub>C</sub> 154.2, 150.0, 146.1, 137.2, 135.5, 135.4, 134.1, 130.9, 130.5, 129.5, 129.0, 128.8, 128.2, 124.9, 123.7, 122.7, 122.3, 38.6, 27.7, 22.4, 14.1; HRMS (ESI-TOF, *m/z*): calcd for C<sub>23</sub>H<sub>21</sub>N<sub>4</sub>O [M + H]<sup>+</sup>, 369.1710; found, 369.1707.

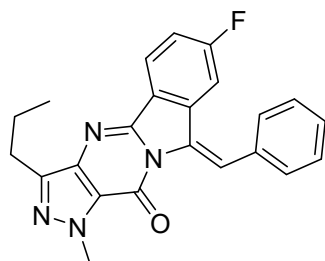

**(*E*)-9-benzylidene-7-fluoro-1-methyl-3-propyl-1,9-dihydro-11*H*-pyrazolo[4',3':4,5]pyrimido[2,1-*a*]isoindol-11-one (**5b**)**

To a 10 mL Schlenk tube equipped with a magnetic stir bar was added 5-(2-bromo-4-fluorophenyl)-1-methyl-3-propyl-1,6-dihydro-7*H*-pyrazolo[4,3-*d*]pyrimidin-7-one **4b** (183 mg, 0.5 mmol, 1.0 equiv), ethynylbenzene **2a** (61 mg, 0.6 mmol, 1.2 equiv), DMF (4.0 mL), Cs<sub>2</sub>CO<sub>3</sub> (163 mg, 0.5 mmol, 1.0 equiv), *o*-phen (18 mg, 0.1 mmol, 0.2 equiv), CuI (10 mg, 0.05 mmol, 0.1 equiv). The reaction mixture was stirred at 80 °C in an oil bath for about 12 h. The resulting mixture was concentrated and the residue was taken up in ethyl acetate. The organic layer was washed with brine, dried over Na<sub>2</sub>SO<sub>4</sub> and concentrated. Purification of the crude product by column chromatography (silica gel; petroleum ether/ethyl acetate = 13:1) afforded **5b** in 25% yield (48 mg).

Yellow solid; mp 181–182 °C; <sup>1</sup>H NMR (CDCl<sub>3</sub>, 400 MHz): δ<sub>H</sub> 9.09 (s, 1H), 8.09–8.05 (m, 1H), 7.51–7.43 (m, 5H), 7.18–7.13 (m, 1H), 6.83 (d, *J* = 9.6 Hz, 1H), 4.34 (s, 3H), 2.94 (t, *J* = 7.6 Hz, 2H), 1.93–1.84 (m, 2H), 1.05 (t, *J* = 7.2 Hz, 3H); <sup>13</sup>C NMR (CDCl<sub>3</sub>, 101 MHz) δ<sub>C</sub> 164.1 (d, *J*<sub>C-F</sub> = 248.2 Hz), 154.1, 149.0, 146.0, 137.1, 135.9 (d, *J*<sub>C-F</sub> = 10.5 Hz), 134.75, 134.67 (d, *J*<sub>C-F</sub> = 4.2 Hz),

128.9 (d,  $J_{C-F} = 22.1$  Hz), 128.5, 126.7 (d,  $J_{C-F} = 2.2$  Hz), 124.6, 124.2 (d,  $J_{C-F} = 14.1$  Hz), 123.9, 117.6 (d,  $J_{C-F} = 24.2$  Hz), 110.8, 110.5, 38.6, 27.7, 22.4, 14.0; HRMS (ESI-TOF,  $m/z$ ): calcd for  $C_{23}H_{20}FN_4O$  [ $M + H$ ] $^+$ , 387.1616; found, 387.1616.

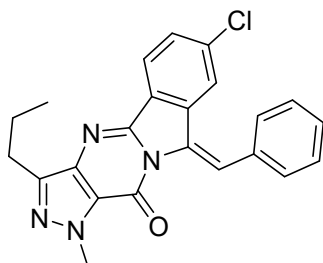

**(E)-9-benzylidene-7-chloro-1-methyl-3-propyl-1,9-dihydro-11H-pyrazolo[4',3':4,5]pyrimido[2,1-a]isoindol-11-one (5c)**

To a 10 mL Schlenk tube equipped with a magnetic stir bar was added 5-(2-bromo-4-chlorophenyl)-1-methyl-3-propyl-1,6-dihydro-7H-pyrazolo[4,3-d]pyrimidin-7-one **4c** (191 mg, 0.5 mmol, 1.0 equiv), ethynylbenzene **2a** (61 mg, 0.6 mmol, 1.2 equiv), DMF (4.0 mL),  $Cs_2CO_3$  (163 mg, 0.5 mmol, 1.0 equiv), *o*-phen (18 mg, 0.1 mmol, 0.2 equiv), CuI (10 mg, 0.05 mmol, 0.1 equiv). The reaction mixture was stirred at 80 °C in an oil bath for about 12 h. The resulting mixture was concentrated and the residue was taken up in ethyl acetate. The organic layer was washed with brine, dried over  $Na_2SO_4$  and concentrated. Purification of the crude product by column chromatography (silica gel; petroleum ether/ethyl acetate = 13:1) afforded **5c** in 20% yield (40 mg).

Yellow solid; mp 186–187 °C;  $^1H$  NMR ( $CDCl_3$ , 400 MHz):  $\delta_H$  9.10 (s, 1H), 8.04 (dd,  $J = 8.0, 1.6$  Hz, 1H), 7.52–7.41 (m, 6H), 7.15 (s, 1H), 4.35 (s, 3H), 2.94 (t,  $J = 8.0$  Hz, 2H), 1.93–1.84 (m, 2H), 1.05 (t,  $J = 7.6$  Hz, 3H);  $^{13}C$  NMR ( $CDCl_3$ , 101 MHz)  $\delta_C$  154.0, 149.0, 146.1, 137.0, 135.4, 134.7, 134.4, 130.0, 129.0, 128.9, 128.8, 128.6, 124.8, 124.0, 123.7, 123.4, 38.6, 27.7, 22.4, 14.0; HRMS (ESI-TOF,  $m/z$ ): calcd for  $C_{23}H_{20}ClN_4O$  [ $M + H$ ] $^+$ , 403.1320; found, 403.1325.

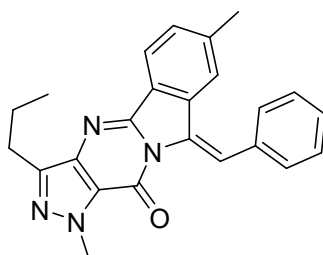



**(E)-9-benzylidene-1,7-dimethyl-3-propyl-1,9-dihydro-11H-pyrazolo[4',3':4,5]pyrimido[2,1- $\alpha$ ]isoindol-11-one (5d)**

To a 10 mL Schlenk tube equipped with a magnetic stir bar was added 5-(2-bromo-4-methylphenyl)-1-methyl-3-propyl-1,6-dihydro-7H-pyrazolo[4,3-*d*]pyrimidin-7-one **4d** (181 mg, 0.5 mmol, 1.0 equiv), ethynylbenzene **2a** (61 mg, 0.6 mmol, 1.2 equiv), DMF (4.0 mL), Cs<sub>2</sub>CO<sub>3</sub> (163 mg, 0.5 mmol, 1.0 equiv), *o*-phen (18 mg, 0.1 mmol, 0.2 equiv), CuI (10 mg, 0.05 mmol, 0.1 equiv). The reaction mixture was stirred at 80 °C in an oil bath for about 12 h. The resulting mixture was concentrated and the residue was taken up in ethyl acetate. The organic layer was washed with brine, dried over Na<sub>2</sub>SO<sub>4</sub> and concentrated. Purification of the crude product by column chromatography (silica gel; petroleum ether/ethyl acetate = 13:1) afforded **5d** in 25% yield (48 mg).

Yellow solid; mp 204–205 °C; <sup>1</sup>H NMR (CDCl<sub>3</sub>, 400 MHz):  $\delta_{\text{H}}$  9.04 (s, 1H), 7.97 (d, *J* = 7.6 Hz, 1H), 7.50–7.40 (m, 5H), 7.27–7.25 (m, 1H), 6.98 (s, 1H), 4.34 (s, 3H), 2.94 (t, *J* = 7.6 Hz, 2H), 2.22 (s, 3H), 1.94–1.84 (m, 2H), 1.05 (t, *J* = 7.2 Hz, 3H); <sup>13</sup>C NMR (CDCl<sub>3</sub>, 101 MHz)  $\delta_{\text{C}}$  154.3, 150.1, 145.9, 141.4, 137.2, 135.6, 135.5, 134.4, 130.7, 129.0, 128.7, 128.1, 124.8, 124.0, 122.5, 122.0, 38.6, 27.7, 22.4, 22.0, 14.1; HRMS (ESI-TOF, *m/z*): calcd for C<sub>24</sub>H<sub>23</sub>N<sub>4</sub>O [M + H]<sup>+</sup>, 383.1866; found, 383.1875.

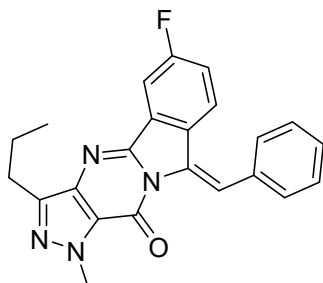

**(E)-9-benzylidene-6-fluoro-1-methyl-3-propyl-1,9-dihydro-11H-pyrazolo[4',3':4,5]pyrimido[2,1- $\alpha$ ]isoindol-11-one (5e)**

To a 10 mL Schlenk tube equipped with a magnetic stir bar was added 5-(2-bromo-5-fluorophenyl)-1-methyl-3-propyl-1,6-dihydro-7H-pyrazolo[4,3-*d*]pyrimidin-7-one **4e** (183 mg, 0.5 mmol, 1.0 equiv), ethynylbenzene **2a** (61 mg, 0.6 mmol, 1.2 equiv), DMF (4.0 mL), Cs<sub>2</sub>CO<sub>3</sub> (163 mg, 0.5 mmol, 1.0 equiv), *o*-phen (18 mg, 0.1 mmol, 0.2 equiv), CuI (10 mg, 0.05 mmol, 0.1 equiv). The reaction mixture was stirred at 80 °C in an oil bath for about 12 h. The resulting mixture was concentrated and the residue was taken up in ethyl acetate. The organic layer was washed with brine, dried over Na<sub>2</sub>SO<sub>4</sub>

and concentrated. Purification of the crude product by column chromatography (silica gel; petroleum ether/ethyl acetate = 13:1) afforded **5e** in 24% yield (46 mg).

Yellow solid; mp 183–184 °C;  $^1\text{H}$  NMR ( $\text{CDCl}_3$ , 400 MHz):  $\delta_{\text{H}}$  9.03 (s, 1H), 7.76–7.73 (m, 1H), 7.50–7.40 (m, 5H), 7.15 (dd,  $J = 8.8, 4.4$  Hz, 1H), 6.95 (t,  $J = 8.8$  Hz, 1H), 4.35 (s, 3H), 2.94 (t,  $J = 7.6$  Hz, 2H), 1.93–1.84 (m, 2H), 1.05 (t,  $J = 7.2$  Hz, 3H);  $^{13}\text{C}$  NMR ( $\text{CDCl}_3$ , 101 MHz)  $\delta_{\text{C}}$  163.3 (d,  $J_{\text{C-F}} = 249.3$  Hz), 154.0, 148.93, 148.89, 146.3, 137.0, 135.2, 134.7, 132.7 (d,  $J_{\text{C-F}} = 10.1$  Hz), 130.2 (d,  $J_{\text{C-F}} = 2.6$  Hz), 128.9 (d,  $J_{\text{C-F}} = 3.4$  Hz), 128.3, 125.7 (d,  $J_{\text{C-F}} = 8.5$  Hz), 124.9, 122.2 (d,  $J_{\text{C-F}} = 1.0$  Hz), 118.7 (d,  $J_{\text{C-F}} = 23.5$  Hz), 108.7 (d,  $J_{\text{C-F}} = 24.1$  Hz), 38.6, 27.7, 22.4, 14.0; HRMS (ESI-TOF,  $m/z$ ): calcd for  $\text{C}_{23}\text{H}_{20}\text{FN}_4\text{O}$  [ $\text{M} + \text{H}$ ] $^+$ , 387.1616; found, 387.1616.

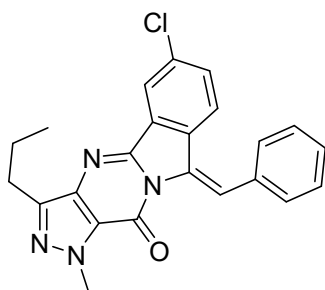

**(E)-9-benzylidene-6-chloro-1-methyl-3-propyl-1,9-dihydro-11H-pyrazolo[4',3':4,5]pyrimido[2,1-a]isoindol-11-one (5f)**

To a 10 mL Schlenk tube equipped with a magnetic stir bar was added 5-(2-bromo-5-chlorophenyl)-1-methyl-3-propyl-1,6-dihydro-7H-pyrazolo[4,3-d]pyrimidin-7-one **4f** (191 mg, 0.5 mmol, 1.0 equiv), ethynylbenzene **2a** (61 mg, 0.6 mmol, 1.2 equiv), DMF (4.0 mL),  $\text{Cs}_2\text{CO}_3$  (163 mg, 0.5 mmol, 1.0 equiv), *o*-phen (18 mg, 0.1 mmol, 0.2 equiv), CuI (10 mg, 0.05 mmol, 0.1 equiv). The reaction mixture was stirred at 80 °C in an oil bath for about 12 h. The resulting mixture was concentrated and the residue was taken up in ethyl acetate. The organic layer was washed with brine, dried over  $\text{Na}_2\text{SO}_4$  and concentrated. Purification of the crude product by column chromatography (silica gel; petroleum ether/ethyl acetate = 13:1) afforded **5f** in 20% yield (40 mg).

Yellow solid; mp 200–201 °C;  $^1\text{H}$  NMR ( $\text{CDCl}_3$ , 400 MHz):  $\delta_{\text{H}}$  9.06 (s, 1H), 8.10–8.08 (m, 1H), 7.50–7.43 (m, 5H), 7.22–7.20 (m, 1H), 7.13–7.10 (m, 1H), 4.35 (s, 3H), 2.95 (t,  $J = 7.2$  Hz, 2H), 1.93–1.84 (m, 2H), 1.05 (t,  $J = 7.2$  Hz, 3H);  $^{13}\text{C}$  NMR ( $\text{CDCl}_3$ , 101 MHz)  $\delta_{\text{C}}$  154.0, 148.7, 146.3, 137.0, 135.7, 135.1, 134.8, 132.4, 132.1, 131.1, 130.0, 128.9, 128.4, 124.9, 123.7, 123.1,

122.2, 38.6, 27.7, 22.4, 14.0; HRMS (ESI-TOF,  $m/z$ ): calcd for  $C_{23}H_{20}ClN_4O$   $[M + H]^+$ , 403.1320; found, 403.1325.

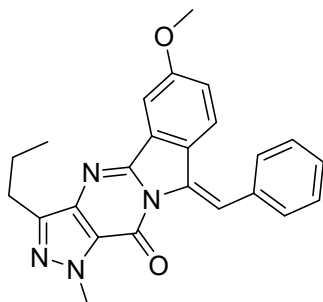

**(E)-9-benzylidene-6-methoxy-1-methyl-3-propyl-1,9-dihydro-11H-pyrazolo[4',3':4,5]pyrimido[2,1-a]isoindol-11-one (5g)**

To a 10 mL Schlenk tube equipped with a magnetic stir bar was added 5-(2-bromo-5-methoxyphenyl)-1-methyl-3-propyl-1,6-dihydro-7H-pyrazolo[4,3-d]pyrimidin-7-one **4g** (188 mg, 0.5 mmol, 1.0 equiv), ethynylbenzene **2a** (61 mg, 0.6 mmol, 1.2 equiv), DMF (4.0 mL),  $Cs_2CO_3$  (163 mg, 0.5 mmol, 1.0 equiv), *o*-phen (18 mg, 0.1 mmol, 0.2 equiv), CuI (10 mg, 0.05 mmol, 0.1 equiv). The reaction mixture was stirred at 80 °C in an oil bath for about 12 h. The resulting mixture was concentrated and the residue was taken up in ethyl acetate. The organic layer was washed with brine, dried over  $Na_2SO_4$  and concentrated. Purification of the crude product by column chromatography (silica gel; petroleum ether/ethyl acetate = 13:1) afforded **5g** in 30% yield (60 mg).

Yellow solid; mp 155–156 °C;  $^1H$  NMR ( $CDCl_3$ , 400 MHz):  $\delta_H$  8.94 (s, 1H), 7.54–7.53 (m, 1H), 7.49–7.38 (m, 5H), 7.10 (d,  $J = 8.8$  Hz, 1H), 6.84–6.81 (m, 1H), 4.35 (s, 3H), 3.92 (s, 3H), 2.96 (t,  $J = 7.6$  Hz, 2H), 1.94–1.85 (m, 2H), 1.06 (t,  $J = 7.6$  Hz, 3H);  $^{13}C$  NMR ( $CDCl_3$ , 101 MHz)  $\delta_C$  160.9, 154.2, 150.0, 146.0, 137.0, 135.6, 135.3, 132.2, 129.1, 128.8, 128.0, 127.2, 125.0, 120.7, 119.8, 104.3, 55.7, 38.6, 27.7, 22.4, 14.1; HRMS (ESI-TOF,  $m/z$ ): calcd for  $C_{24}H_{23}N_4O_2$   $[M + H]^+$ , 399.1816; found, 399.1824.

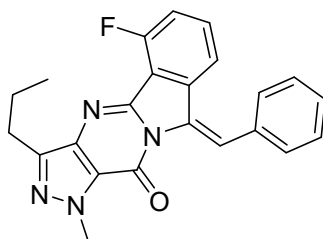

**(E)-9-benzylidene-5-fluoro-1-methyl-3-propyl-1,9-dihydro-11H-pyrazolo[4',3':4,5]pyrimido[2,1-*a*]isoindol-11-one (5h)**

To a 10 mL Schlenk tube equipped with a magnetic stir bar was added 5-(2-bromo-6-fluorophenyl)-1-methyl-3-propyl-1,6-dihydro-7H-pyrazolo[4,3-*d*]pyrimidin-7-one **4h** (183 mg, 0.5 mmol, 1.0 equiv), ethynylbenzene **2a** (61 mg, 0.6 mmol, 1.2 equiv), DMF (4.0 mL), Cs<sub>2</sub>CO<sub>3</sub> (163 mg, 0.5 mmol, 1.0 equiv), *o*-phen (18 mg, 0.1 mmol, 0.2 equiv), CuI (10 mg, 0.05 mmol, 0.1 equiv). The reaction mixture was stirred at 80 °C in an oil bath for about 12 h. The resulting mixture was concentrated and the residue was taken up in ethyl acetate. The organic layer was washed with brine, dried over Na<sub>2</sub>SO<sub>4</sub> and concentrated. Purification of the crude product by column chromatography (silica gel; petroleum ether/ethyl acetate = 13:1) afforded **5h** in 25% yield (48 mg).

Yellow solid; mp 209–210 °C; <sup>1</sup>H NMR (CDCl<sub>3</sub>, 400 MHz): δ<sub>H</sub> 9.12 (s, 1H), 7.50–7.40 (m, 5H), 7.23–7.18 (m, 1H), 7.14–7.10 (m, 1H), 6.99 (d, *J* = 8.0 Hz, 1H), 4.35 (s, 3H), 2.97 (t, *J* = 7.6 Hz, 2H), 1.95–1.86 (m, 2H), 1.05 (t, *J* = 7.2 Hz, 3H); <sup>13</sup>C NMR (CDCl<sub>3</sub>, 101 MHz) δ<sub>C</sub> 158.1 (d, *J*<sub>C-F</sub> = 259.1 Hz), 153.9, 147.25, 147.19, 146.5, 137.2, 136.5 (d, *J*<sub>C-F</sub> = 2.7 Hz), 135.2, 134.9 (d, *J*<sub>C-F</sub> = 1.9 Hz), 132.2 (d, *J*<sub>C-F</sub> = 7.4 Hz), 128.9 (d, *J*<sub>C-F</sub> = 8.7 Hz), 128.3, 124.5, 123.7, 119.6 (d, *J*<sub>C-F</sub> = 4.2 Hz), 118.0 (d, *J*<sub>C-F</sub> = 12.6 Hz), 116.5 (d, *J*<sub>C-F</sub> = 18.7 Hz), 38.6, 27.7, 22.2, 14.0; HRMS (ESI-TOF, *m/z*): calcd for C<sub>23</sub>H<sub>20</sub>FN<sub>4</sub>O [M + H]<sup>+</sup>, 387.1616; found, 387.1616.

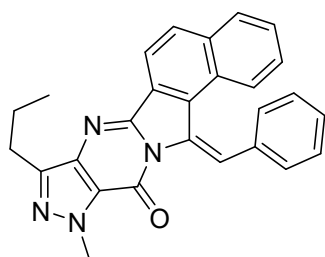

**(E)-13-benzylidene-10-methyl-8-propyl-10,13-dihydro-11H-benzo[*e*]pyrazolo[4',3':4,5]pyrimido[2,1-*a*]isoindol-11-one (5i)**

To a 10 mL Schlenk tube equipped with a magnetic stir bar was added 5-(1-bromonaphthalen-2-yl)-1-methyl-3-propyl-1,6-dihydro-7H-pyrazolo[4,3-*d*]pyrimidin-7-one **4i** (198 mg, 0.5 mmol, 1.0 equiv), ethynylbenzene **2a** (61 mg, 0.6 mmol, 1.2 equiv), DMF (4.0 mL), Cs<sub>2</sub>CO<sub>3</sub> (163 mg, 0.5 mmol, 1.0 equiv), *o*-phen (18 mg, 0.1 mmol, 0.2 equiv), CuI (10 mg, 0.05 mmol, 0.1 equiv). The reaction mixture was stirred at 80 °C in an oil bath for about 12 h. The resulting mixture was concentrated and the residue was taken up in ethyl acetate. The organic layer was washed with brine, dried over Na<sub>2</sub>SO<sub>4</sub>

and concentrated. Purification of the crude product by column chromatography (silica gel; petroleum ether/ethyl acetate = 13:1) afforded **5i** in 28% yield (59 mg).

Yellow solid; mp 159–160 °C;  $^1\text{H}$  NMR ( $\text{CDCl}_3$ , 400 MHz):  $\delta_{\text{H}}$  9.41 (d,  $J$  = 3.6 Hz, 1H), 8.18–8.14 (m, 1H), 7.98–7.95 (m, 1H), 7.84–7.82 (m, 1H), 7.39–7.36 (m, 1H), 7.31–7.20 (m, 6H), 7.00–6.96 (m, 1H), 4.36 (s, 3H), 3.00–2.96 (m, 2H), 1.96–1.87 (m, 2H), 1.07 (t,  $J$  = 7.6 Hz, 3H);  $^{13}\text{C}$  NMR ( $\text{CDCl}_3$ , 101 MHz)  $\delta_{\text{C}}$  153.8, 150.1, 146.0, 137.1, 136.2, 136.0, 135.5, 132.10, 132.07, 131.8, 130.9, 130.5, 128.8, 128.6, 128.3, 127.7, 127.0, 126.4, 126.2, 124.9, 122.0, 118.65, 118.62, 38.6, 27.8, 22.4, 14.1; HRMS (ESI-TOF,  $m/z$ ): calcd for  $\text{C}_{27}\text{H}_{23}\text{N}_4\text{O}$  [ $\text{M} + \text{H}$ ] $^+$ , 419.1866; found, 419.1870.

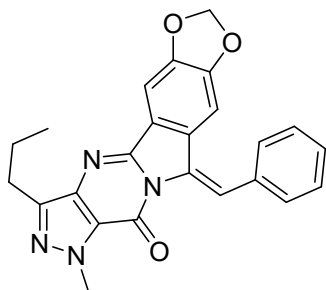

**(E)-10-benzylidene-1-methyl-3-propyl-1,10-dihydro-12H-[1,3]dioxolo[4,5-f]pyrazolo[4',3':4,5]pyrimido[2,1-a]isoindol-12-one (**5j**)**

To a 10 mL Schlenk tube equipped with a magnetic stir bar was added 5-(6-bromobenzo[*d*][1,3]dioxol-5-yl)-1-methyl-3-propyl-1,6-dihydro-7*H*-pyrazolo[4,3-*d*]pyrimidin-7-one **4j** (195 mg, 0.5 mmol, 1.0 equiv), ethynylbenzene **2a** (61 mg, 0.6 mmol, 1.2 equiv), DMF (4.0 mL),  $\text{Cs}_2\text{CO}_3$  (163 mg, 0.5 mmol, 1.0 equiv), *o*-phen (18 mg, 0.1 mmol, 0.2 equiv), CuI (10 mg, 0.05 mmol, 0.1 equiv). The reaction mixture was stirred at 80 °C in an oil bath for about 12 h. The resulting mixture was concentrated and the residue was taken up in ethyl acetate. The organic layer was washed with brine, dried over  $\text{Na}_2\text{SO}_4$  and concentrated. Purification of the crude product by column chromatography (silica gel; petroleum ether/ethyl acetate = 13:1) afforded **5j** in 23% yield (47 mg).

Yellow solid; mp 236–237 °C;  $^1\text{H}$  NMR ( $\text{CDCl}_3$ , 400 MHz):  $\delta_{\text{H}}$  8.96 (s, 1H), 7.48–7.38 (m, 6H), 6.52 (s, 1H), 6.00 (s, 2H), 4.33 (s, 3H), 2.93 (t,  $J$  = 7.6 Hz, 2H), 1.92–1.83 (m, 2H), 1.04 (t,  $J$  = 7.6 Hz, 3H);  $^{13}\text{C}$  NMR ( $\text{CDCl}_3$ , 101 MHz)  $\delta_{\text{C}}$  154.1, 150.6, 149.8, 149.5, 145.8, 137.1, 135.23, 135.16, 129.4, 128.9, 128.8, 128.1, 125.6, 124.5, 121.4, 103.5, 102.0, 101.5, 38.5, 27.7, 22.4, 14.1; HRMS (ESI-TOF,  $m/z$ ): calcd for  $\text{C}_{24}\text{H}_{21}\text{N}_4\text{O}_3$  [ $\text{M} + \text{H}$ ] $^+$ , 413.1609; found, 413.1623.

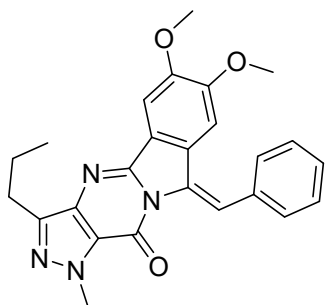

**(E)-9-benzylidene-6,7-dimethoxy-1-methyl-3-propyl-1,9-dihydro-11H-pyrazolo[4',3':4,5]pyrimido[2,1-a]isoindol-11-one (5k)**

To a 10 mL Schlenk tube equipped with a magnetic stir bar was added 5-(2-bromo-4,5-dimethoxyphenyl)-1-methyl-3-propyl-1,6-dihydro-7H-pyrazolo[4,3-d]pyrimidin-7-one **4k** (203 mg, 0.5 mmol, 1.0 equiv), ethynylbenzene **2a** (61 mg, 0.6 mmol, 1.2 equiv), DMF (4.0 mL), Cs<sub>2</sub>CO<sub>3</sub> (163 mg, 0.5 mmol, 1.0 equiv), *o*-phen (18 mg, 0.1 mmol, 0.2 equiv), CuI (10 mg, 0.05 mmol, 0.1 equiv). The reaction mixture was stirred at 80 °C in an oil bath for about 12 h. The resulting mixture was concentrated and the residue was taken up in ethyl acetate. The organic layer was washed with brine, dried over Na<sub>2</sub>SO<sub>4</sub> and concentrated. Purification of the crude product by column chromatography (silica gel; petroleum ether/ethyl acetate = 13:1) afforded **5k** in 30% yield (64 mg).

Yellow solid; mp 208–209 °C; <sup>1</sup>H NMR (CDCl<sub>3</sub>, 400 MHz): δ<sub>H</sub> 8.93 (s, 1H), 7.52–7.44 (m, 5H), 7.41–7.38 (m, 1H), 6.53 (s, 1H), 4.33 (s, 3H), 4.01 (s, 3H), 3.49 (s, 3H), 2.94 (t, *J* = 6.8 Hz, 2H), 1.94–1.84 (m, 2H), 1.06 (t, *J* = 7.6 Hz, 3H); <sup>13</sup>C NMR (CDCl<sub>3</sub>, 101 MHz) δ<sub>C</sub> 154.2, 151.6, 151.0, 150.3, 145.7, 137.2, 135.6, 135.5, 129.2, 128.7, 128.0, 127.9, 124.6, 123.7, 120.9, 105.6, 103.1, 56.3, 55.6, 38.6, 27.7, 22.5, 14.1; HRMS (ESI-TOF, *m/z*): calcd for C<sub>25</sub>H<sub>25</sub>N<sub>4</sub>O<sub>3</sub> [M + H]<sup>+</sup>, 429.1921; found, 429.1947.

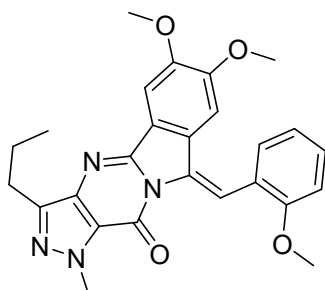

**(E)-6,7-dimethoxy-9-(2-methoxybenzylidene)-1-methyl-3-propyl-1,9-dihydro-11H-pyrazolo[4',3':4,5]pyrimido[2,1-a]isoindol-11-one (5l)**

To a 10 mL Schlenk tube equipped with a magnetic stir bar was added 5-(2-bromo-4,5-dimethoxyphenyl)-1-methyl-3-propyl-1,6-dihydro-7H-pyrazolo[4,3-d]pyrimidin-7-one **4k** (203 mg, 0.5 mmol, 1.0 equiv), 1-ethynyl-2-methoxybenzene **2e** (79 mg, 0.6 mmol, 1.2 equiv), DMF (4.0 mL), Cs<sub>2</sub>CO<sub>3</sub> (163 mg, 0.5 mmol, 1.0 equiv), *o*-phen (18 mg, 0.1 mmol, 0.2 equiv), CuI (10 mg, 0.05 mmol, 0.1 equiv). The reaction mixture was stirred at 80 °C in an oil bath for about 12 h. The resulting mixture was concentrated and the residue was taken up in ethyl acetate. The organic layer was washed with brine, dried over Na<sub>2</sub>SO<sub>4</sub> and concentrated. Purification of the crude product by column chromatography (silica gel; petroleum ether/ethyl acetate = 13:1) afforded **5l** in 30% yield (69 mg).

Yellow solid; mp 203–205 °C; <sup>1</sup>H NMR (CDCl<sub>3</sub>, 400 MHz): δ<sub>H</sub> 8.86 (s, 1H), 7.53–7.47 (m, 2H), 7.40 (t, *J* = 8.0 Hz, 1H), 7.05–7.01 (m, 2H), 6.76 (s, 1H), 4.35 (s, 3H), 4.02 (s, 3H), 3.86 (s, 3H), 3.55 (s, 3H), 2.95 (t, *J* = 8.0 Hz, 2H), 1.94–1.85 (m, 2H), 1.06 (t, *J* = 7.2 Hz, 3H); <sup>13</sup>C NMR (CDCl<sub>3</sub>, 101 MHz) δ<sub>C</sub> 157.4, 154.2, 151.7, 151.0, 150.4, 145.7, 137.2, 135.0, 131.0, 130.0, 128.2, 124.7, 124.1, 123.7, 120.2, 117.7, 111.0, 105.5, 103.1, 56.3, 55.62, 55.59, 38.6, 27.7, 22.4, 14.1; HRMS (ESI-TOF, *m/z*): calcd for C<sub>26</sub>H<sub>27</sub>N<sub>4</sub>O<sub>4</sub> [M + H]<sup>+</sup>, 459.2027; found, 459.2057.

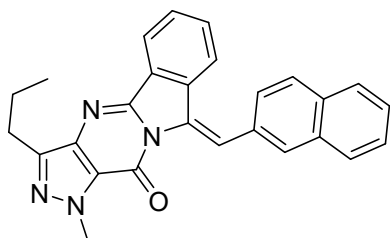

**(E)-1-methyl-9-(naphthalen-2-ylmethylene)-3-propyl-1,9-dihydro-11H-pyrazolo[4',3':4,5]pyrimido[2,1-a]isoindol-11-one (5m)**

To a 10 mL Schlenk tube equipped with a magnetic stir bar was added 5-(2-bromophenyl)-1-methyl-3-propyl-1,6-dihydro-7H-pyrazolo[4,3-d]pyrimidin-7-one **4a** (174 mg, 0.5 mmol, 1.0 equiv), 2-ethynyl-naphthalene **2u** (91 mg, 0.6 mmol, 1.2 equiv), DMF (4.0 mL), Cs<sub>2</sub>CO<sub>3</sub> (163 mg, 0.5 mmol, 1.0 equiv), *o*-phen (18 mg, 0.1 mmol, 0.2 equiv), CuI (10 mg, 0.05 mmol, 0.1 equiv). The reaction mixture was stirred at 80 °C in an oil bath for about 12 h. The resulting mixture was concentrated and the residue was taken up in ethyl acetate. The organic layer was washed with brine, dried over Na<sub>2</sub>SO<sub>4</sub> and concentrated. Purification of the crude product by column chromatography (silica gel; petroleum ether/ethyl acetate = 13:1) afforded **5m** in 35% yield (73 mg).

Yellow solid; mp 196–197 °C;  $^1\text{H}$  NMR ( $\text{CDCl}_3$ , 400 MHz):  $\delta_{\text{H}}$  9.22 (s, 1H), 8.13 (d,  $J = 8.0$  Hz, 1H), 7.99 (s, 1H), 7.95–7.90 (m, 2H), 7.86–7.84 (m, 1H), 7.60–7.52 (m, 3H), 7.47–7.43 (m, 1H), 7.29–7.26 (m, 1H), 7.22–7.18 (m, 1H), 4.36 (s, 3H), 2.97 (t,  $J = 7.6$  Hz, 2H), 1.95–1.86 (m, 2H), 1.06 (t,  $J = 8.0$  Hz, 3H);  $^{13}\text{C}$  NMR ( $\text{CDCl}_3$ , 101 MHz)  $\delta_{\text{C}}$  154.3, 150.0, 146.1, 137.2, 135.6, 134.2, 133.4, 132.9, 132.8, 131.0, 130.6, 129.6, 128.5, 128.2, 128.1, 127.8, 127.0, 126.54, 126.52, 124.9, 123.7, 122.7, 122.4, 38.6, 27.7, 22.4, 14.0; HRMS (ESI-TOF,  $m/z$ ): calcd for  $\text{C}_{27}\text{H}_{23}\text{N}_4\text{O}$   $[\text{M} + \text{H}]^+$ , 419.1866; found, 419.1870.

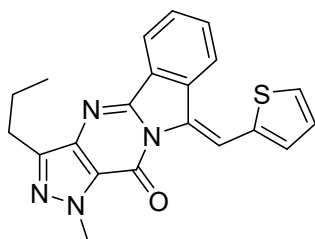

**(*E*)-1-methyl-3-propyl-9-(thiophen-2-ylmethylene)-1,9-dihydro-11H-pyrazolo[4',3':4,5]pyrimido[2,1-*a*]isoindol-11-one (5n)**

To a 10 mL Schlenk tube equipped with a magnetic stir bar was added 5-(2-bromophenyl)-1-methyl-3-propyl-1,6-dihydro-7*H*-pyrazolo[4,3-*d*]pyrimidin-7-one **4a** (174 mg, 0.5 mmol, 1.0 equiv), 2-ethynylthiophene **2v** (65 mg, 0.6 mmol, 1.2 equiv), DMF (4.0 mL),  $\text{Cs}_2\text{CO}_3$  (163 mg, 0.5 mmol, 1.0 equiv), *o*-phen (18 mg, 0.1 mmol, 0.2 equiv), CuI (10 mg, 0.05 mmol, 0.1 equiv). The reaction mixture was stirred at 80 °C in an oil bath for about 12 h. The resulting mixture was concentrated and the residue was taken up in ethyl acetate. The organic layer was washed with brine, dried over  $\text{Na}_2\text{SO}_4$  and concentrated. Purification of the crude product by column chromatography (silica gel; petroleum ether/ethyl acetate = 13:1) afforded **5n** in 35% yield (66 mg).

Yellow solid; mp 189–190 °C;  $^1\text{H}$  NMR ( $\text{CDCl}_3$ , 400 MHz):  $\delta_{\text{H}}$  8.99 (s, 1H), 8.11 (dd,  $J = 7.6$  Hz, 2.8 Hz, 1H), 7.64 (d,  $J = 8.0$  Hz, 1H), 7.52–7.47 (m, 2H), 7.38–7.34 (m, 1H), 7.28–7.27 (m, 1H), 7.16–7.14 (m, 1H), 4.34 (s, 3H), 2.95 (t,  $J = 7.6$  Hz, 2H), 1.94–1.84 (m, 2H), 1.05 (t,  $J = 8.0$  Hz, 3H);  $^{13}\text{C}$  NMR ( $\text{CDCl}_3$ , 101 MHz)  $\delta_{\text{C}}$  154.1, 149.7, 146.1, 137.1, 137.0, 136.6, 133.8, 131.1, 130.6, 129.8, 128.1, 127.6, 127.5, 124.8, 123.6, 122.3, 114.7, 38.6, 27.7, 22.4, 14.0; HRMS (ESI-TOF,  $m/z$ ): calcd for  $\text{C}_{21}\text{H}_{19}\text{N}_4\text{OS}$   $[\text{M} + \text{H}]^+$ , 375.1274; found, 375.1280.



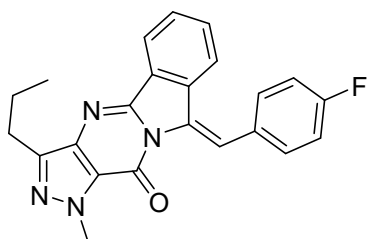

**(E)-9-(4-fluorobenzylidene)-1-methyl-3-propyl-1,9-dihydro-11H-pyrazolo[4',3':4,5]pyrimido[2,1- $\alpha$ ]isoindol-11-one (5o)**

To a 10 mL Schlenk tube equipped with a magnetic stir bar was added 5-(2-bromophenyl)-1-methyl-3-propyl-1,6-dihydro-7H-pyrazolo[4,3-d]pyrimidin-7-one **4a** (174 mg, 0.5 mmol, 1.0 equiv), 1-ethynyl-4-fluorobenzene **2k** (72 mg, 0.6 mmol, 1.2 equiv), DMF (4.0 mL), Cs<sub>2</sub>CO<sub>3</sub> (163 mg, 0.5 mmol, 1.0 equiv), *o*-phen (18 mg, 0.1 mmol, 0.2 equiv), CuI (10 mg, 0.05 mmol, 0.1 equiv). The reaction mixture was stirred at 80 °C in an oil bath for about 12 h. The resulting mixture was concentrated and the residue was taken up in ethyl acetate. The organic layer was washed with brine, dried over Na<sub>2</sub>SO<sub>4</sub> and concentrated. Purification of the crude product by column chromatography (silica gel; petroleum ether/ethyl acetate = 13:1) afforded **5o** in 27% yield (52 mg).

Yellow solid; mp 238–239 °C; <sup>1</sup>H NMR (CDCl<sub>3</sub>, 400 MHz):  $\delta_{\text{H}}$  9.00 (s, 1H), 8.12 (d,  $J$  = 7.6 Hz, 1H), 7.49–7.45 (m, 3H), 7.31–7.27 (m, 1H), 7.21–7.15 (m, 3H), 4.34 (s, 3H), 2.95 (t,  $J$  = 7.6 Hz, 2H), 1.94–1.85 (m, 2H), 1.05 (t,  $J$  = 7.2 Hz, 3H); <sup>13</sup>C NMR (CDCl<sub>3</sub>, 101 MHz)  $\delta_{\text{C}}$  162.6 (d,  $J_{\text{C-F}}$  = 246.8 Hz), 154.2, 149.9, 146.1, 137.2, 135.8, 134.0, 131.3 (d,  $J_{\text{C-F}}$  = 4.1 Hz), 131.0, 130.8 (d,  $J_{\text{C-F}}$  = 8.0 Hz), 130.6, 129.7, 124.9, 123.5, 122.4, 121.4, 116.0 (d,  $J_{\text{C-F}}$  = 21.6 Hz), 38.6, 27.7, 22.4, 14.0; HRMS (ESI-TOF,  $m/z$ ): calcd for C<sub>23</sub>H<sub>20</sub>FN<sub>4</sub>O [M + H]<sup>+</sup>, 387.1616; found, 387.1616.

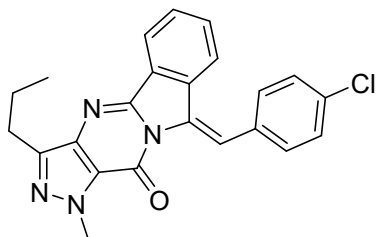

**(E)-9-(4-chlorobenzylidene)-1-methyl-3-propyl-1,9-dihydro-11H-pyrazolo[4',3':4,5]pyrimido[2,1- $\alpha$ ]isoindol-11-one (5p)**

To a 10 mL Schlenk tube equipped with a magnetic stir bar was added 5-(2-bromophenyl)-1-methyl-3-propyl-1,6-dihydro-7H-pyrazolo[4,3-d]pyrimidin-7-one **4a** (174 mg, 0.5 mmol, 1.0 equiv), 1-chloro-4-ethynylbenzene **2l** (82 mg, 0.6 mmol, 1.2 equiv), DMF (4.0 mL), Cs<sub>2</sub>CO<sub>3</sub> (163 mg, 0.5 mmol, 1.0 equiv), *o*-phen (18 mg, 0.1 mmol, 0.2 equiv), CuI (10 mg, 0.05 mmol, 0.1 equiv). The reaction mixture

was stirred at 80 °C in an oil bath for about 12 h. The resulting mixture was concentrated and the residue was taken up in ethyl acetate. The organic layer was washed with brine, dried over Na<sub>2</sub>SO<sub>4</sub> and concentrated. Purification of the crude product by column chromatography (silica gel; petroleum ether/ethyl acetate = 13:1) afforded **5p** in 20% yield (40 mg).

Yellow solid; mp 229–230 °C; <sup>1</sup>H NMR (CDCl<sub>3</sub>, 400 MHz): δ<sub>H</sub> 8.99 (s, 1H), 8.12 (d, *J* = 7.6 Hz, 1H), 7.51–7.42 (m, 5H), 7.31 (t, *J* = 7.6 Hz, 1H), 7.24 (d, *J* = 8.0 Hz, 1H), 4.35 (s, 3H), 2.96 (t, *J* = 7.6 Hz, 2H), 1.94–1.85 (m, 2H), 1.05 (t, *J* = 7.2 Hz, 3H); <sup>13</sup>C NMR (CDCl<sub>3</sub>, 101 MHz) δ<sub>C</sub> 154.2, 149.9, 146.2, 137.2, 135.9, 134.1, 133.9, 133.8, 131.0, 130.7, 130.4, 129.8, 129.1, 124.9, 123.6, 122.5, 121.1, 38.6, 27.7, 22.4, 14.0; HRMS (ESI-TOF, *m/z*): calcd for C<sub>23</sub>H<sub>20</sub>ClN<sub>4</sub>O [M + H]<sup>+</sup>, 403.1320; found, 403.1325.

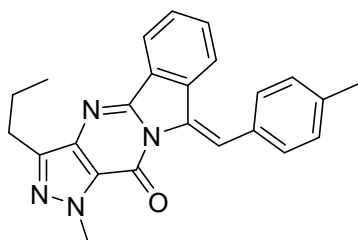

**(E)-1-methyl-9-(4-methylbenzylidene)-3-propyl-1,9-dihydro-11H-pyrazolo[4',3':4,5]pyrimido[2,1-a]isoindol-11-one (5q)**

To a 10 mL Schlenk tube equipped with a magnetic stir bar was added 5-(2-bromophenyl)-1-methyl-3-propyl-1,6-dihydro-7H-pyrazolo[4,3-*d*]pyrimidin-7-one **4a** (174 mg, 0.5 mmol, 1.0 equiv), 1-ethynyl-4-methylbenzene **2n** (70 mg, 0.6 mmol, 1.2 equiv), DMF (4.0 mL), Cs<sub>2</sub>CO<sub>3</sub> (163 mg, 0.5 mmol, 1.0 equiv), *o*-phen (18 mg, 0.1 mmol, 0.2 equiv), CuI (10 mg, 0.05 mmol, 0.1 equiv). The reaction mixture was stirred at 80 °C in an oil bath for about 12 h. The resulting mixture was concentrated and the residue was taken up in ethyl acetate. The organic layer was washed with brine, dried over Na<sub>2</sub>SO<sub>4</sub> and concentrated. Purification of the crude product by column chromatography (silica gel; petroleum ether/ethyl acetate = 13:1) afforded **5q** in 30% yield (57 mg).

Yellow solid; mp 202–203 °C; <sup>1</sup>H NMR (CDCl<sub>3</sub>, 400 MHz): δ<sub>H</sub> 9.04 (s, 1H), 8.10 (d, *J* = 7.6 Hz, 1H), 7.47–7.37 (m, 3H), 7.33–7.26 (m, 4H), 4.34 (s, 3H), 2.95 (t, *J* = 7.6 Hz, 2H), 2.44 (s, 3H), 1.94–1.85 (m, 2H), 1.05 (t, *J* = 7.2 Hz, 3H); <sup>13</sup>C NMR (CDCl<sub>3</sub>, 101 MHz) δ<sub>C</sub> 154.2, 150.0, 146.0, 138.1, 137.2, 135.2, 134.2, 132.3, 130.8, 130.5, 129.5, 129.4, 128.9, 124.9, 123.7, 123.0, 122.3, 38.6, 27.7, 22.4, 21.4, 14.0; HRMS (ESI-TOF, *m/z*): calcd for C<sub>24</sub>H<sub>23</sub>N<sub>4</sub>O [M + H]<sup>+</sup>, 383.1866; found, 383.1875.

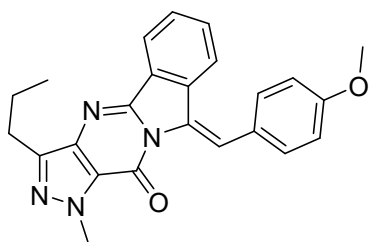

**(E)-9-(4-methoxybenzylidene)-1-methyl-3-propyl-1,9-dihydro-11H-pyrazolo[4',3':4,5]pyrimido[2,1- $\alpha$ ]isoindol-11-one (5r)**

To a 10 mL Schlenk tube equipped with a magnetic stir bar was added 5-(2-bromophenyl)-1-methyl-3-propyl-1,6-dihydro-7H-pyrazolo[4,3-*d*]pyrimidin-7-one **4a** (174 mg, 0.5 mmol, 1.0 equiv), 1-ethynyl-4-methoxybenzene **2o** (79 mg, 0.6 mmol, 1.2 equiv), DMF (4.0 mL), Cs<sub>2</sub>CO<sub>3</sub> (163 mg, 0.5 mmol, 1.0 equiv), *o*-phen (18 mg, 0.1 mmol, 0.2 equiv), CuI (10 mg, 0.05 mmol, 0.1 equiv). The reaction mixture was stirred at 80 °C in an oil bath for about 12 h. The resulting mixture was concentrated and the residue was taken up in ethyl acetate. The organic layer was washed with brine, dried over Na<sub>2</sub>SO<sub>4</sub> and concentrated. Purification of the crude product by column chromatography (silica gel; petroleum ether/ethyl acetate = 13:1) afforded **5r** in 25% yield (50 mg).

Yellow solid; mp 206–207 °C; <sup>1</sup>H NMR (CDCl<sub>3</sub>, 400 MHz):  $\delta_{\text{H}}$  9.02 (s, 1H), 8.11 (d, *J* = 7.6 Hz, 1H), 7.48–7.42 (m, 3H), 7.38 (d, *J* = 8.0 Hz, 1H), 7.31–7.26 (m, 1H), 7.01–6.99 (m, 2H), 4.35 (s, 3H), 3.90 (s, 3H), 2.96 (t, *J* = 7.6 Hz, 2H), 1.94–1.85 (m, 2H), 1.05 (t, *J* = 7.6 Hz, 3H); <sup>13</sup>C NMR (CDCl<sub>3</sub>, 101 MHz)  $\delta_{\text{C}}$  159.6, 154.3, 150.0, 146.0, 137.2, 135.1, 134.3, 130.9, 130.5, 129.4, 127.5, 124.9, 123.5, 122.8, 122.3, 114.2, 55.3, 38.6, 27.7, 22.4, 14.1; HRMS (ESI-TOF, *m/z*): calcd for C<sub>24</sub>H<sub>23</sub>N<sub>4</sub>O<sub>2</sub> [M + H]<sup>+</sup>, 399.1816; found, 399.1824.

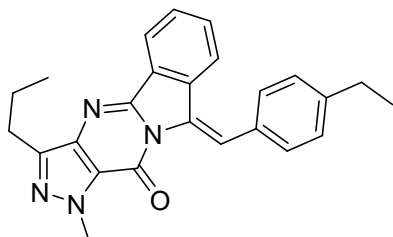

**(E)-9-(4-ethylbenzylidene)-1-methyl-3-propyl-1,9-dihydro-11H-pyrazolo[4',3':4,5]pyrimido[2,1- $\alpha$ ]isoindol-11-one (5s)**

To a 10 mL Schlenk tube equipped with a magnetic stir bar was added 5-(2-bromophenyl)-1-methyl-3-propyl-1,6-dihydro-7H-pyrazolo[4,3-*d*]pyrimidin-7-one **4a** (174 mg, 0.5 mmol, 1.0 equiv), 1-ethyl-4-ethynylbenzene **2p** (78 mg, 0.6 mmol, 1.2 equiv), DMF (4.0 mL), Cs<sub>2</sub>CO<sub>3</sub> (163 mg, 0.5 mmol, 1.0 equiv), *o*-phen (18 mg, 0.1 mmol, 0.2 equiv), CuI (10 mg, 0.05 mmol, 0.1 equiv). The reaction mixture

was stirred at 80 °C in an oil bath for about 12 h. The resulting mixture was concentrated and the residue was taken up in ethyl acetate. The organic layer was washed with brine, dried over Na<sub>2</sub>SO<sub>4</sub> and concentrated. Purification of the crude product by column chromatography (silica gel; petroleum ether/ethyl acetate = 13:1) afforded **5s** in 30% yield (59 mg).

Yellow solid; mp 170–171 °C; <sup>1</sup>H NMR (CDCl<sub>3</sub>, 400 MHz): δ<sub>H</sub> 9.05 (s, 1H), 8.11 (d, *J* = 8.0 Hz, 1H), 7.48–7.40 (m, 3H), 7.34–7.26 (m, 4H), 4.35 (s, 3H), 2.95 (t, *J* = 8.4 Hz, 2H), 2.77–2.72 (m, 2H), 1.94–1.85 (m, 2H), 1.32 (t, *J* = 7.6 Hz, 3H), 1.05 (t, *J* = 7.2 Hz, 3H); <sup>13</sup>C NMR (CDCl<sub>3</sub>, 101 MHz) δ<sub>C</sub> 154.2, 150.0, 146.0, 144.4, 137.2, 135.2, 134.3, 132.5, 130.9, 130.5, 129.4, 129.0, 128.3, 124.9, 123.7, 123.0, 122.3, 38.6, 28.7, 27.7, 22.4, 15.4, 14.1; HRMS (ESI-TOF, *m/z*): calcd for C<sub>25</sub>H<sub>25</sub>N<sub>4</sub>O [M + H]<sup>+</sup>, 397.2023; found, 397.2034.

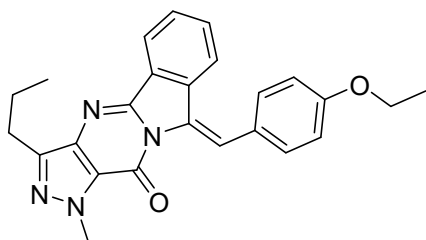

**(E)-9-(4-ethoxybenzylidene)-1-methyl-3-propyl-1,9-dihydro-11H-pyrazolo[4',3':4,5]pyrimido[2,1-a]isoindol-11-one (5t)**

To a 10 mL Schlenk tube equipped with a magnetic stir bar was added 5-(2-bromophenyl)-1-methyl-3-propyl-1,6-dihydro-7H-pyrazolo[4,3-*d*]pyrimidin-7-one **4a** (174 mg, 0.5 mmol, 1.0 equiv), 1-ethoxy-4-ethynylbenzene **2q** (88 mg, 0.6 mmol, 1.2 equiv), DMF (4.0 mL), Cs<sub>2</sub>CO<sub>3</sub> (163 mg, 0.5 mmol, 1.0 equiv), *o*-phen (18 mg, 0.1 mmol, 0.2 equiv), CuI (10 mg, 0.05 mmol, 0.1 equiv). The reaction mixture was stirred at 80 °C in an oil bath for about 12 h. The resulting mixture was concentrated and the residue was taken up in ethyl acetate. The organic layer was washed with brine, dried over Na<sub>2</sub>SO<sub>4</sub> and concentrated. Purification of the crude product by column chromatography (silica gel; petroleum ether/ethyl acetate = 13:1) afforded **5t** in 26% yield (54 mg).

Yellow solid; mp 196–197 °C; <sup>1</sup>H NMR (CDCl<sub>3</sub>, 400 MHz): δ<sub>H</sub> 9.03 (s, 1H), 8.12 (d, *J* = 7.6 Hz, 1H), 7.48–7.39 (m, 4H), 7.32–7.26 (m, 1H), 7.00–6.97 (m, 2H), 4.35 (s, 3H), 4.15–4.10 (m, 2H), 2.96 (t, *J* = 7.6 Hz, 2H), 1.94–1.85 (m, 2H), 1.48 (t, *J* = 7.2 Hz, 3H), 1.05 (t, *J* = 7.2 Hz, 3H); <sup>13</sup>C NMR (CDCl<sub>3</sub>, 101 MHz) δ<sub>C</sub> 159.0, 154.3, 150.0, 146.0, 137.2, 135.0, 134.3, 130.9, 130.49, 130.45, 129.3, 127.3, 124.9, 123.5, 122.9, 122.3, 114.7, 63.5, 38.6, 27.7, 22.4, 14.9, 14.1; HRMS (ESI-TOF, *m/z*): calcd for C<sub>25</sub>H<sub>25</sub>N<sub>4</sub>O<sub>2</sub> [M + H]<sup>+</sup>, 413.1972; found, 413.1984.

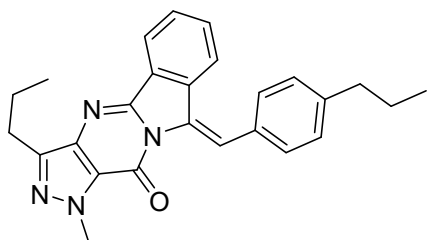

**(E)-1-methyl-3-propyl-9-(4-propylbenzylidene)-1,9-dihydro-11H-pyrazolo[4',3':4,5]pyrimido[2,1- $\alpha$ ]isoindol-11-one (5u)**

To a 10 mL Schlenk tube equipped with a magnetic stir bar was added 5-(2-bromophenyl)-1-methyl-3-propyl-1,6-dihydro-7H-pyrazolo[4,3-*d*]pyrimidin-7-one **4a** (174 mg, 0.5 mmol, 1.0 equiv), 1-ethynyl-4-propylbenzene **2r** (87 mg, 0.6 mmol, 1.2 equiv), DMF (4.0 mL), Cs<sub>2</sub>CO<sub>3</sub> (163 mg, 0.5 mmol, 1.0 equiv), *o*-phen (18 mg, 0.1 mmol, 0.2 equiv), CuI (10 mg, 0.05 mmol, 0.1 equiv). The reaction mixture was stirred at 80 °C in an oil bath for about 12 h. The resulting mixture was concentrated and the residue was taken up in ethyl acetate. The organic layer was washed with brine, dried over Na<sub>2</sub>SO<sub>4</sub> and concentrated. Purification of the crude product by column chromatography (silica gel; petroleum ether/ethyl acetate = 13:1) afforded **5u** in 24% yield (49 mg).

Yellow solid; mp 142–143 °C; <sup>1</sup>H NMR (CDCl<sub>3</sub>, 400 MHz):  $\delta_{\text{H}}$  9.06 (s, 1H), 8.12–8.10 (m, 1H), 7.47–7.39 (m, 3H), 7.32–7.26 (m, 4H), 4.35 (s, 3H), 2.96 (t, *J* = 7.6 Hz, 2H), 2.68 (t, *J* = 7.6 Hz, 2H), 1.94–1.85 (m, 2H), 1.77–1.68 (m, 2H), 1.07–0.99 (m, 6H); <sup>13</sup>C NMR (CDCl<sub>3</sub>, 101 MHz)  $\delta_{\text{C}}$  154.2, 150.0, 146.0, 142.9, 137.2, 135.3, 134.3, 132.6, 130.8, 130.5, 129.4, 128.92, 128.87, 124.9, 123.7, 123.1, 122.3, 38.6, 37.9, 27.7, 24.4, 22.4, 14.1, 13.8; HRMS (ESI-TOF, *m/z*): calcd for C<sub>26</sub>H<sub>27</sub>N<sub>4</sub>O [M + H]<sup>+</sup>, 411.2179; found, 411.2188.

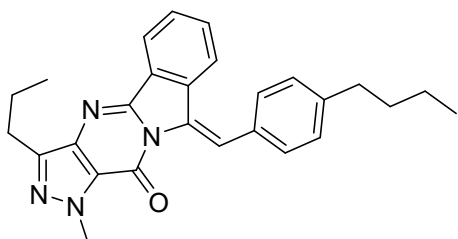

**(E)-9-(4-butylbenzylidene)-1-methyl-3-propyl-1,9-dihydro-11H-pyrazolo[4',3':4,5]pyrimido[2,1- $\alpha$ ]isoindol-11-one (5v)**

To a 10 mL Schlenk tube equipped with a magnetic stir bar was added 5-(2-bromophenyl)-1-methyl-3-propyl-1,6-dihydro-7H-pyrazolo[4,3-*d*]pyrimidin-7-one **4a** (174 mg, 0.5 mmol, 1.0 equiv), 1-butyl-4-ethynylbenzene **2s** (95 mg, 0.6 mmol, 1.2 equiv), DMF (4.0 mL), Cs<sub>2</sub>CO<sub>3</sub> (163 mg, 0.5 mmol, 1.0

equiv), *o*-phen (18 mg, 0.1 mmol, 0.2 equiv), CuI (10 mg, 0.05 mmol, 0.1 equiv). The reaction mixture was stirred at 80 °C in an oil bath for about 12 h. The resulting mixture was concentrated and the residue was taken up in ethyl acetate. The organic layer was washed with brine, dried over Na<sub>2</sub>SO<sub>4</sub> and concentrated. Purification of the crude product by column chromatography (silica gel; petroleum ether/ethyl acetate = 13:1) afforded **5v** in 21% yield (45 mg).

Yellow solid; mp 207–208 °C; <sup>1</sup>H NMR (CDCl<sub>3</sub>, 400 MHz): δ<sub>H</sub> 9.05 (s, 1H), 8.11 (d, *J* = 7.6 Hz, 1H), 7.47–7.39 (m, 3H), 7.32–7.25 (m, 4H), 4.35 (s, 3H), 2.96 (t, *J* = 7.6 Hz, 2H), 2.70 (t, *J* = 7.6 Hz, 2H), 1.94–1.85 (m, 2H), 1.72–1.68 (m, 2H), 1.47–1.38 (m, 2H), 1.05 (t, *J* = 7.2 Hz, 3H), 0.98 (t, *J* = 7.2 Hz, 3H); <sup>13</sup>C NMR (CDCl<sub>3</sub>, 101 MHz) δ<sub>C</sub> 154.2, 150.0, 146.0, 143.2, 137.2, 135.2, 134.3, 132.5, 130.8, 130.5, 129.4, 128.9, 128.8, 124.9, 123.7, 123.1, 122.3, 38.6, 35.5, 33.5, 27.7, 22.41, 22.39, 14.05, 13.98; HRMS (ESI-TOF, *m/z*): calcd for C<sub>27</sub>H<sub>29</sub>N<sub>4</sub>O [M + H]<sup>+</sup>, 425.2336; found, 425.2352.

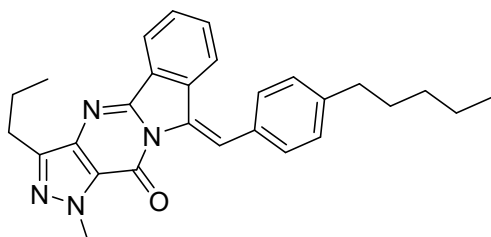

**(E)-1-methyl-9-(4-pentylbenzylidene)-3-propyl-1,9-dihydro-11H-pyrazolo[4',3':4,5]pyrimido[2,1- $\alpha$ ]isoindol-11-one (**5w**)**

To a 10 mL Schlenk tube equipped with a magnetic stir bar was added 5-(2-bromophenyl)-1-methyl-3-propyl-1,6-dihydro-7H-pyrazolo[4,3-*d*]pyrimidin-7-one **4a** (174 mg, 0.5 mmol, 1.0 equiv), 1-ethynyl-4-pentylbenzene **2t** (103 mg, 0.6 mmol, 1.2 equiv), DMF (4.0 mL), Cs<sub>2</sub>CO<sub>3</sub> (163 mg, 0.5 mmol, 1.0 equiv), *o*-phen (18 mg, 0.1 mmol, 0.2 equiv), CuI (10 mg, 0.05 mmol, 0.1 equiv). The reaction mixture was stirred at 80 °C in an oil bath for about 12 h. The resulting mixture was concentrated and the residue was taken up in ethyl acetate. The organic layer was washed with brine, dried over Na<sub>2</sub>SO<sub>4</sub> and concentrated. Purification of the crude product by column chromatography (silica gel; petroleum ether/ethyl acetate = 13:1) afforded **5w** in 28% yield (61 mg).

Yellow solid; mp 154–155 °C; <sup>1</sup>H NMR (CDCl<sub>3</sub>, 400 MHz): δ<sub>H</sub> 9.06 (s, 1H), 8.11 (dd, *J* = 7.6, 1.2 Hz, 1H), 7.48–7.44 (m, 1H), 7.41–7.39 (m, 2H), 7.32–7.26 (m, 4H), 4.35 (s, 3H), 2.96 (t, *J* = 7.6 Hz, 2H), 2.69 (t, *J* = 7.6 Hz, 2H), 1.94–1.85 (m, 2H), 1.73–1.66 (m, 2H), 1.41–1.36 (m, 4H),

1.05 (t,  $J = 7.6$  Hz, 3H), 0.95–0.91 (m, 3H);  $^{13}\text{C}$  NMR ( $\text{CDCl}_3$ , 101 MHz)  $\delta_{\text{C}}$  154.2, 150.0, 146.0, 143.2, 137.2, 135.2, 134.3, 132.5, 130.8, 130.5, 129.4, 128.9, 128.8, 124.9, 123.7, 123.1, 122.3, 38.6, 35.8, 31.5, 31.1, 27.7, 22.6, 22.4, 14.08, 14.06; HRMS (ESI-TOF,  $m/z$ ): calcd for  $\text{C}_{28}\text{H}_{31}\text{N}_4\text{O}$  [ $\text{M} + \text{H}$ ] $^+$ , 439.2492; found, 439.2513.

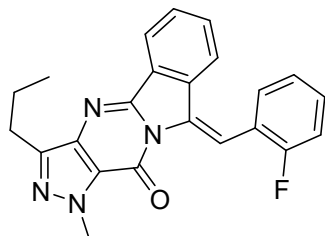

**(*E*)-9-(2-fluorobenzylidene)-1-methyl-3-propyl-1,9-dihydro-11*H*-pyrazolo[4',3':4,5]pyrimido[2,1-*a*]isoindol-11-one (5x)**

To a 10 mL Schlenk tube equipped with a magnetic stir bar was added 5-(2-bromophenyl)-1-methyl-3-propyl-1,6-dihydro-7*H*-pyrazolo[4,3-*d*]pyrimidin-7-one **4a** (174 mg, 0.5 mmol, 1.0 equiv), 1-ethynyl-2-fluorobenzene **2b** (72 mg, 0.6 mmol, 1.2 equiv), DMF (4.0 mL),  $\text{Cs}_2\text{CO}_3$  (163 mg, 0.5 mmol, 1.0 equiv), *o*-phen (18 mg, 0.1 mmol, 0.2 equiv), CuI (10 mg, 0.05 mmol, 0.1 equiv). The reaction mixture was stirred at 80 °C in an oil bath for about 12 h. The resulting mixture was concentrated and the residue was taken up in ethyl acetate. The organic layer was washed with brine, dried over  $\text{Na}_2\text{SO}_4$  and concentrated. Purification of the crude product by column chromatography (silica gel; petroleum ether/ethyl acetate = 13:1) afforded **5x** in 26% yield (50 mg).

Yellow solid; mp 193–194 °C;  $^1\text{H}$  NMR ( $\text{CDCl}_3$ , 400 MHz):  $\delta_{\text{H}}$  8.91 (s, 1H), 8.12 (d,  $J = 7.6$  Hz, 1H), 7.54–7.41 (m, 3H), 7.33–7.29 (m, 1H), 7.24–7.19 (m, 3H), 4.35 (s, 3H), 2.96 (t,  $J = 7.6$  Hz, 2H), 1.94–1.85 (m, 2H), 1.05 (t,  $J = 7.2$  Hz, 3H);  $^{13}\text{C}$  NMR ( $\text{CDCl}_3$ , 101 MHz)  $\delta_{\text{C}}$  160.0 (d,  $J_{\text{C-F}} = 246.8$  Hz), 154.2, 149.9, 146.2, 137.2, 136.6, 134.0, 131.2 (d,  $J_{\text{C-F}} = 2.7$  Hz), 131.1, 130.7, 130.3 (d,  $J_{\text{C-F}} = 7.9$  Hz), 129.8, 124.9, 124.3 (d,  $J_{\text{C-F}} = 3.6$  Hz), 123.4, 123.1 (d,  $J_{\text{C-F}} = 15.9$  Hz), 122.4, 116.1 (d,  $J_{\text{C-F}} = 21.4$  Hz), 115.1 (d,  $J_{\text{C-F}} = 20.0$  Hz), 38.6, 27.7, 22.4, 14.0; HRMS (ESI-TOF,  $m/z$ ): calcd for  $\text{C}_{28}\text{H}_{31}\text{N}_4\text{O}$  [ $\text{M} + \text{H}$ ] $^+$ , 439.2492; found, 439.2513.

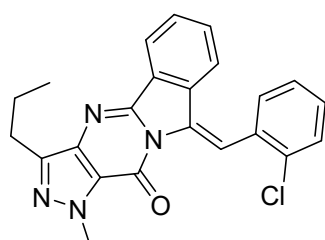

**(E)-9-(2-chlorobenzylidene)-1-methyl-3-propyl-1,9-dihydro-11H-pyrazolo[4',3':4,5]pyrimido[2,1- $\alpha$ ]isoindol-11-one (5y)**

To a 10 mL Schlenk tube equipped with a magnetic stir bar was added 5-(2-bromophenyl)-1-methyl-3-propyl-1,6-dihydro-7H-pyrazolo[4,3-*d*]pyrimidin-7-one **4a** (174 mg, 0.5 mmol, 1.0 equiv), 1-chloro-2-ethynylbenzene **2c** (82 mg, 0.6 mmol, 1.2 equiv), DMF (4.0 mL), Cs<sub>2</sub>CO<sub>3</sub> (163 mg, 0.5 mmol, 1.0 equiv), *o*-phen (18 mg, 0.1 mmol, 0.2 equiv), CuI (10 mg, 0.05 mmol, 0.1 equiv). The reaction mixture was stirred at 80 °C in an oil bath for about 12 h. The resulting mixture was concentrated and the residue was taken up in ethyl acetate. The organic layer was washed with brine, dried over Na<sub>2</sub>SO<sub>4</sub> and concentrated. Purification of the crude product by column chromatography (silica gel; petroleum ether/ethyl acetate = 13:1) afforded **5y** in 28% yield (56 mg).

Yellow solid; mp 163–164 °C; <sup>1</sup>H NMR (CDCl<sub>3</sub>, 400 MHz):  $\delta_{\text{H}}$  8.96 (s, 1H), 8.12 (d, *J* = 7.6 Hz, 1H), 7.56–7.53 (m, 2H), 7.50–7.46 (m, 1H), 7.41–7.33 (m, 2H), 7.30–7.26 (m, 1H), 7.04 (d, *J* = 8.0 Hz, 1H), 4.36 (s, 3H), 2.96 (t, *J* = 7.6 Hz, 2H), 1.94–1.85 (m, 2H), 1.05 (t, *J* = 7.2 Hz, 3H); <sup>13</sup>C NMR (CDCl<sub>3</sub>, 101 MHz)  $\delta_{\text{C}}$  154.2, 150.0, 146.2, 137.2, 136.1, 134.1, 134.0, 133.9, 131.1, 131.0, 130.7, 130.0, 129.8, 129.7, 126.9, 125.0, 123.5, 122.4, 119.4, 38.6, 27.7, 22.4, 14.0; HRMS (ESI-TOF, *m/z*): calcd for C<sub>23</sub>H<sub>20</sub>ClN<sub>4</sub>O [M + H]<sup>+</sup>, 403.1320; found, 403.1325.

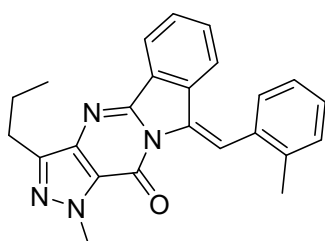

**(E)-1-methyl-9-(2-methylbenzylidene)-3-propyl-1,9-dihydro-11H-pyrazolo[4',3':4,5]pyrimido[2,1- $\alpha$ ]isoindol-11-one (5z)**

To a 10 mL Schlenk tube equipped with a magnetic stir bar was added 5-(2-bromophenyl)-1-methyl-3-propyl-1,6-dihydro-7H-pyrazolo[4,3-*d*]pyrimidin-7-one **4a** (174 mg, 0.5 mmol, 1.0 equiv), 1-ethynyl-2-methylbenzene **2d** (70 mg, 0.6 mmol, 1.2 equiv), DMF (4.0 mL), Cs<sub>2</sub>CO<sub>3</sub> (163 mg, 0.5 mmol, 1.0 equiv), *o*-phen (18 mg, 0.1 mmol, 0.2 equiv), CuI (10 mg, 0.05 mmol, 0.1 equiv). The reaction mixture was stirred at 80 °C in an oil bath for about 12 h. The resulting mixture was concentrated and the residue was taken up in ethyl acetate. The organic layer was washed with brine, dried over Na<sub>2</sub>SO<sub>4</sub> and concentrated. Purification of the crude product by column chromatography (silica gel; petroleum ether/ethyl acetate = 13:1) afforded **5z** in 35% yield (67 mg).



Yellow solid; mp 149–151 °C;  $^1\text{H}$  NMR ( $\text{CDCl}_3$ , 400 MHz):  $\delta_{\text{H}}$  9.00 (s, 1H), 8.12 (d,  $J = 8.0$  Hz, 1H), 7.45 (t,  $J = 7.6$  Hz, 1H), 7.40–7.35 (m, 3H), 7.30–7.23 (m, 2H), 6.92 (d,  $J = 8.0$  Hz, 1H), 4.36 (s, 3H), 2.97 (t,  $J = 7.6$  Hz, 2H), 2.35 (s, 3H), 1.95–1.85 (m, 2H), 1.05 (t,  $J = 7.2$  Hz, 3H);  $^{13}\text{C}$  NMR ( $\text{CDCl}_3$ , 101 MHz)  $\delta_{\text{C}}$  154.3, 150.0, 146.1, 137.2, 136.5, 135.4, 134.7, 134.4, 131.1, 130.5, 130.4, 129.4, 129.1, 128.4, 126.1, 125.0, 123.6, 122.24, 122.16, 38.6, 27.7, 22.4, 20.2, 14.0; HRMS (ESI-TOF,  $m/z$ ): calcd for  $\text{C}_{24}\text{H}_{23}\text{N}_4\text{O}$  [ $\text{M} + \text{H}$ ] $^+$ , 383.1866; found, 383.1875.

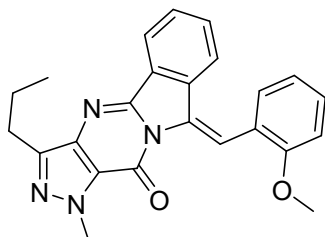

**(*E*)-9-(2-methoxybenzylidene)-1-methyl-3-propyl-1,9-dihydro-11*H*-pyrazolo[4',3':4,5]pyrimido[2,1-*a*]isoindol-11-one (5aa)**

To a 10 mL Schlenk tube equipped with a magnetic stir bar was added 5-(2-bromophenyl)-1-methyl-3-propyl-1,6-dihydro-7*H*-pyrazolo[4,3-*d*]pyrimidin-7-one **4a** (174 mg, 0.5 mmol, 1.0 equiv), 1-ethynyl-2-methoxybenzene **2e** (79 mg, 0.6 mmol, 1.2 equiv), DMF (4.0 mL),  $\text{Cs}_2\text{CO}_3$  (163 mg, 0.5 mmol, 1.0 equiv), *o*-phen (18 mg, 0.1 mmol, 0.2 equiv), CuI (10 mg, 0.05 mmol, 0.1 equiv). The reaction mixture was stirred at 80 °C in an oil bath for about 12 h. The resulting mixture was concentrated and the residue was taken up in ethyl acetate. The organic layer was washed with brine, dried over  $\text{Na}_2\text{SO}_4$  and concentrated. Purification of the crude product by column chromatography (silica gel; petroleum ether/ethyl acetate = 13:1) afforded **5aa** in 32% yield (64 mg).

Yellow solid; mp 144–145 °C;  $^1\text{H}$  NMR ( $\text{CDCl}_3$ , 400 MHz):  $\delta_{\text{H}}$  8.99 (s, 1H), 8.11 (d,  $J = 7.6$  Hz, 1H), 7.50–7.35 (m, 4H), 7.30–7.26 (m, 1H), 7.04–7.00 (m, 2H), 4.35 (s, 3H), 3.84 (s, 3H), 2.96 (t,  $J = 7.6$  Hz, 2H), 1.94–1.85 (m, 2H), 1.05 (t,  $J = 8.8$  Hz, 3H);  $^{13}\text{C}$  NMR ( $\text{CDCl}_3$ , 101 MHz)  $\delta_{\text{C}}$  157.3, 154.2, 150.0, 146.0, 137.1, 135.1, 134.4, 130.84, 130.79, 130.5, 130.0, 129.3, 125.0, 123.9, 123.5, 122.2, 120.5, 119.5, 110.9, 55.5, 38.6, 27.7, 22.4, 14.0; HRMS (ESI-TOF,  $m/z$ ): calcd for  $\text{C}_{24}\text{H}_{23}\text{N}_4\text{O}_2$  [ $\text{M} + \text{H}$ ] $^+$ , 399.1816; found, 399.1824.

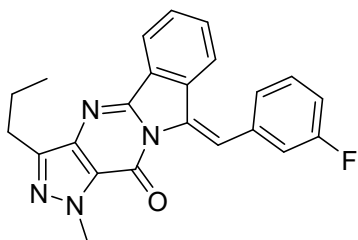

**(E)-9-(3-fluorobenzylidene)-1-methyl-3-propyl-1,9-dihydro-11H-pyrazolo[4',3':4,5]pyrimido[2,1-a]isoindol-11-one (5ab)**

To a 10 mL Schlenk tube equipped with a magnetic stir bar was added 5-(2-bromophenyl)-1-methyl-3-propyl-1,6-dihydro-7H-pyrazolo[4,3-d]pyrimidin-7-one **4a** (174 mg, 0.5 mmol, 1.0 equiv), 1-ethynyl-3-fluorobenzene **2f** (72 mg, 0.6 mmol, 1.2 equiv), DMF (4.0 mL), Cs<sub>2</sub>CO<sub>3</sub> (163 mg, 0.5 mmol, 1.0 equiv), *o*-phen (18 mg, 0.1 mmol, 0.2 equiv), CuI (10 mg, 0.05 mmol, 0.1 equiv). The reaction mixture was stirred at 80 °C in an oil bath for about 12 h. The resulting mixture was concentrated and the residue was taken up in ethyl acetate. The organic layer was washed with brine, dried over Na<sub>2</sub>SO<sub>4</sub> and concentrated. Purification of the crude product by column chromatography (silica gel; petroleum ether/ethyl acetate = 13:1) afforded **5ab** in 25% yield (48 mg).

Yellow solid; mp 175–176 °C; <sup>1</sup>H NMR (CDCl<sub>3</sub>, 400 MHz): δ<sub>H</sub> 9.00 (s, 1H), 8.11 (dd, *J* = 8.4, 3.2 Hz, 1H), 7.50–7.42 (m, 2H), 7.31–7.26 (m, 2H), 7.21–7.18 (m, 2H), 7.15–7.11 (m, 1H), 4.34 (s, 3H), 2.95 (t, *J* = 8.4 Hz, 2H), 1.94–1.84 (m, 2H), 1.05 (t, *J* = 7.2 Hz, 3H); <sup>13</sup>C NMR (CDCl<sub>3</sub>, 101 MHz) δ<sub>C</sub> 163.0 (d, *J*<sub>C-F</sub> = 245.7 Hz), 154.2, 149.8, 146.2, 137.5 (d, *J*<sub>C-F</sub> = 8.0 Hz), 137.2, 136.0, 133.8, 131.0, 130.7, 130.5 (d, *J*<sub>C-F</sub> = 8.4 Hz), 129.8, 124.84, 124.79 (d, *J*<sub>C-F</sub> = 3.0 Hz), 123.7, 122.4, 120.9 (d, *J*<sub>C-F</sub> = 2.0 Hz), 115.9 (d, *J*<sub>C-F</sub> = 21.5 Hz), 115.1 (d, *J*<sub>C-F</sub> = 20.9 Hz), 38.6, 27.7, 22.4, 14.0; HRMS (ESI-TOF, *m/z*): calcd for C<sub>23</sub>H<sub>20</sub>FN<sub>4</sub>O [M + H]<sup>+</sup>, 387.1616; found, 387.1616.

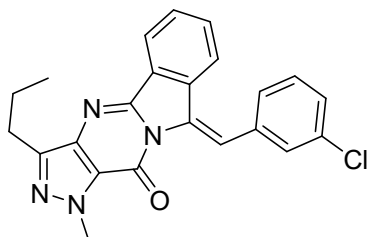

**(E)-9-(3-chlorobenzylidene)-1-methyl-3-propyl-1,9-dihydro-11H-pyrazolo[4',3':4,5]pyrimido[2,1-a]isoindol-11-one (5ac)**

To a 10 mL Schlenk tube equipped with a magnetic stir bar was added 5-(2-bromophenyl)-1-methyl-3-propyl-1,6-dihydro-7H-pyrazolo[4,3-d]pyrimidin-7-one **4a** (174 mg, 0.5 mmol, 1.0 equiv), 1-chloro-3-ethynylbenzene **2g** (82 mg, 0.6 mmol, 1.2 equiv), DMF (4.0 mL), Cs<sub>2</sub>CO<sub>3</sub> (163 mg, 0.5 mmol, 1.0

equiv), *o*-phen (18 mg, 0.1 mmol, 0.2 equiv), CuI (10 mg, 0.05 mmol, 0.1 equiv). The reaction mixture was stirred at 80 °C in an oil bath for about 12 h. The resulting mixture was concentrated and the residue was taken up in ethyl acetate. The organic layer was washed with brine, dried over Na<sub>2</sub>SO<sub>4</sub> and concentrated. Purification of the crude product by column chromatography (silica gel; petroleum ether/ethyl acetate = 13:1) afforded **5ac** in 30% yield (60 mg).

Yellow solid; mp 140–143 °C; <sup>1</sup>H NMR (CDCl<sub>3</sub>, 400 MHz): δ<sub>H</sub> 8.98 (s, 1H), 8.12 (d, *J* = 8.0 Hz, 1H), 7.50–7.46 (m, 2H), 7.42–7.36 (m, 3H), 7.32–7.27 (m, 1H), 7.18 (d, *J* = 8.0 Hz, 1H), 4.34 (s, 3H), 2.95 (t, *J* = 7.6 Hz, 2H), 1.94–1.84 (m, 2H), 1.05 (t, *J* = 7.6 Hz, 3H); <sup>13</sup>C NMR (CDCl<sub>3</sub>, 101 MHz) δ<sub>C</sub> 154.2, 149.8, 146.2, 137.2, 137.1, 136.1, 134.7, 133.8, 131.1, 130.7, 130.1, 129.8, 129.0, 128.2, 127.2, 124.8, 123.6, 122.4, 120.7, 38.6, 27.7, 22.4, 14.0; HRMS (ESI-TOF, *m/z*): calcd for C<sub>23</sub>H<sub>20</sub>ClN<sub>4</sub>O [M + H]<sup>+</sup>, 403.1320; found, 403.1325.

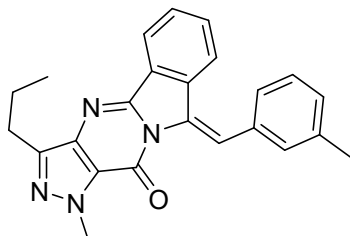

**(E)-1-methyl-9-(3-methylbenzylidene)-3-propyl-1,9-dihydro-11H-pyrazolo[4',3':4,5]pyrimido[2,1-a]isoindol-11-one (5ad)**

To a 10 mL Schlenk tube equipped with a magnetic stir bar was added 5-(2-bromophenyl)-1-methyl-3-propyl-1,6-dihydro-7H-pyrazolo[4,3-*d*]pyrimidin-7-one **4a** (174 mg, 0.5 mmol, 1.0 equiv), 1-ethynyl-3-methylbenzene **2h** (70 mg, 0.6 mmol, 1.2 equiv), DMF (4.0 mL), Cs<sub>2</sub>CO<sub>3</sub> (163 mg, 0.5 mmol, 1.0 equiv), *o*-phen (18 mg, 0.1 mmol, 0.2 equiv), CuI (10 mg, 0.05 mmol, 0.1 equiv). The reaction mixture was stirred at 80 °C in an oil bath for about 12 h. The resulting mixture was concentrated and the residue was taken up in ethyl acetate. The organic layer was washed with brine, dried over Na<sub>2</sub>SO<sub>4</sub> and concentrated. Purification of the crude product by column chromatography (silica gel; petroleum ether/ethyl acetate = 13:1) afforded **5ad** in 30% yield (57 mg).

Yellow solid; mp 144–145 °C; <sup>1</sup>H NMR (CDCl<sub>3</sub>, 400 MHz): δ<sub>H</sub> 9.05 (s, 1H), 8.11 (d, *J* = 7.6 Hz, 1H), 7.48–7.44 (m, 1H), 7.36 (t, *J* = 7.6 Hz, 1H), 7.30–7.22 (m, 5H), 4.35 (s, 3H), 2.96 (t, *J* = 7.6 Hz, 2H), 2.41 (s, 3H), 1.94–1.85 (m, 2H), 1.05 (t, *J* = 7.6 Hz, 3H); <sup>13</sup>C NMR (CDCl<sub>3</sub>, 101 MHz) δ<sub>C</sub> 154.2, 150.0, 146.0, 138.5, 137.2, 135.4, 135.3, 134.3, 130.9, 130.5, 129.5, 129.4, 128.9,

128.7, 126.0, 124.9, 123.8, 123.0, 122.3, 38.6, 27.7, 22.4, 21.4, 14.0; HRMS (ESI-TOF,  $m/z$ ): calcd for  $C_{24}H_{23}N_4O$   $[M + H]^+$ , 383.1866; found, 383.1875.

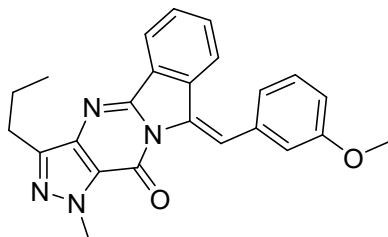

**(E)-9-(3-methoxybenzylidene)-1-methyl-3-propyl-1,9-dihydro-11H-pyrazolo[4',3':4,5]pyrimido[2,1-a]isoindol-11-one (5ae)**

To a 10 mL Schlenk tube equipped with a magnetic stir bar was added 5-(2-bromophenyl)-1-methyl-3-propyl-1,6-dihydro-7H-pyrazolo[4,3-d]pyrimidin-7-one **4a** (174 mg, 0.5 mmol, 1.0 equiv), 1-ethynyl-3-methoxybenzene **2i** (79 mg, 0.6 mmol, 1.2 equiv), DMF (4.0 mL),  $Cs_2CO_3$  (163 mg, 0.5 mmol, 1.0 equiv), *o*-phen (18 mg, 0.1 mmol, 0.2 equiv), CuI (10 mg, 0.05 mmol, 0.1 equiv). The reaction mixture was stirred at 80 °C in an oil bath for about 12 h. The resulting mixture was concentrated and the residue was taken up in ethyl acetate. The organic layer was washed with brine, dried over  $Na_2SO_4$  and concentrated. Purification of the crude product by column chromatography (silica gel; petroleum ether/ethyl acetate = 13:1) afforded **5ae** in 34% yield (68 mg). Yellow solid; mp 145–148 °C;  $^1H$  NMR ( $CDCl_3$ , 400 MHz):  $\delta_H$  9.04 (s, 1H), 8.11 (d,  $J = 8.0$  Hz, 1H), 7.49–7.45 (m, 1H), 7.40–7.36 (m, 1H), 7.31–7.27 (m, 2H), 7.08 (d,  $J = 7.2$  Hz, 1H), 7.02 (s, 1H), 6.97 (dd,  $J = 8.0, 2.4$  Hz, 1H), 4.35 (s, 3H), 3.84 (s, 3H), 2.96 (t,  $J = 8.0$  Hz, 2H), 1.94–1.85 (m, 2H), 1.05 (t,  $J = 7.2$  Hz, 3H);  $^{13}C$  NMR ( $CDCl_3$ , 101 MHz)  $\delta_C$  159.9, 154.2, 150.0, 146.1, 137.2, 136.7, 135.6, 134.1, 131.0, 130.6, 129.9, 129.6, 124.9, 123.9, 122.5, 122.3, 121.3, 114.0, 55.3, 38.6, 27.7, 22.4, 14.0; HRMS (ESI-TOF,  $m/z$ ): calcd for  $C_{24}H_{23}N_4O_2$   $[M + H]^+$ , 399.1816; found, 399.1824.

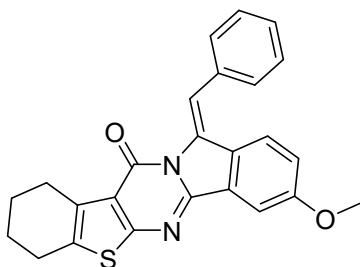

**(E)-11-benzylidene-8-methoxy-2,3,4,11-tetrahydrobenzo[4',5']thieno[2',3':4,5]pyrimido[2,1-*a*]isoindol-13(1*H*)-one (5af)**

To a 10 mL Schlenk tube equipped with a magnetic stir bar was added 2-(2-bromo-5-methoxyphenyl)-5,6,7,8-tetrahydrobenzo[4,5]thieno[2,3-*d*]pyrimidin-4(3*H*)-one **7** (78 mg, 0.2 mmol, 1.0 equiv), phenylacetylene **2a** (31 mg, 0.3 mmol, 1.5 equiv), DMF (4.0 mL), Cs<sub>2</sub>CO<sub>3</sub> (65 mg, 0.2 mmol, 1.0 equiv), *o*-phen (7 mg, 0.04 mmol, 0.2 equiv), CuI (4 mg, 0.02 mmol, 0.1 equiv). The reaction mixture was stirred at 80 °C in an oil bath for about 12 h. The resulting mixture was concentrated and the residue was taken up in ethyl acetate. The organic layer was washed with brine, dried over Na<sub>2</sub>SO<sub>4</sub> and concentrated. Purification of the crude product by column chromatography (silica gel; petroleum ether/ethyl acetate = 10:1) afforded **5af** in 85% yield (70 mg).

Yellow solid; mp 213–215 °C; <sup>1</sup>H NMR (CDCl<sub>3</sub>, 400 MHz): δ<sub>H</sub> 9.11 (s, 1H), 7.50–7.38 (m, 6H), 7.16 (d, *J* = 8.8 Hz, 1H), 6.86–6.83 (m, 1H), 3.89 (s, 3H), 3.16–3.13 (m, 2H), 2.84–2.81 (m, 2H), 1.93–1.88 (m, 4H); <sup>13</sup>C NMR (CDCl<sub>3</sub>, 101 MHz): δ<sub>C</sub> 161.4, 161.0, 158.4, 151.1, 135.6, 135.4, 133.7, 132.5, 131.8, 129.2, 128.8, 128.1, 127.2, 125.1, 122.5, 121.6, 120.4, 104.1, 55.8, 26.0, 25.5, 22.9, 22.4; HRMS (ESI-TOF, *m/z*): calcd for C<sub>25</sub>H<sub>21</sub>O<sub>2</sub>N<sub>2</sub>S [M + H]<sup>+</sup>, 413.1318; found, 413.1347.

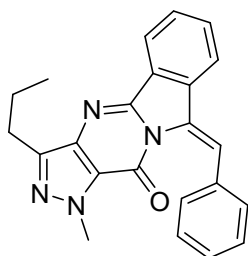

**(Z)-9-benzylidene-1-methyl-3-propyl-1,9-dihydro-11*H*-pyrazolo[4',3':4,5]pyrimido[2,1-*a*]isoindol-11-one (6a)**

To a 10 mL Schlenk tube equipped with a magnetic stir bar was added 5-(2-bromophenyl)-1-methyl-3-propyl-1,6-dihydro-7*H*-pyrazolo[4,3-*d*]pyrimidin-7-one **4a** (174 mg, 0.5 mmol, 1.0 equiv), ethynylbenzene **2a** (61 mg, 0.6 mmol, 1.2 equiv), DMF (4.0 mL), Cs<sub>2</sub>CO<sub>3</sub> (163 mg, 0.5 mmol, 1.0 equiv), *o*-phen (18 mg, 0.1 mmol, 0.2 equiv), CuI (10 mg, 0.05 mmol, 0.1 equiv). The reaction mixture was stirred at 80 °C in an oil bath for about 12 h. The resulting mixture was concentrated and the residue was taken up in ethyl acetate. The organic layer was washed with brine, dried over Na<sub>2</sub>SO<sub>4</sub>

and concentrated. Purification of the crude product by column chromatography (silica gel; petroleum ether/ethyl acetate = 13:1) afforded **6a** in 55% yield (101 mg).

Yellow solid; mp 141–143 °C; **6a** : **5a** = 96 : 4; <sup>1</sup>H NMR (CDCl<sub>3</sub>, 400 MHz, Major Product **6a**): δ<sub>H</sub> 8.13 (d, *J* = 7.6 Hz, 1H), 7.86 (d, *J* = 7.6 Hz, 1H), 7.61–7.52 (m, 2H), 7.39–7.31 (m, 3H), 7.27–7.21 (m, 3H), 4.18 (s, 3H), 2.96 (t, *J* = 7.6 Hz, 2H), 1.94–1.85 (m, 2H), 1.07 (t, *J* = 7.2 Hz, 3H); <sup>13</sup>C NMR (CDCl<sub>3</sub>, 101 MHz) δ<sub>C</sub> 151.8, 151.1, 146.1, 138.1, 136.9, 136.2, 131.3, 130.3, 129.9, 129.3, 129.2, 127.9, 127.2, 124.8, 122.5, 119.6, 115.9, 38.4, 27.7, 22.5, 14.1; HRMS (ESI-TOF, *m/z*): calcd for C<sub>23</sub>H<sub>21</sub>N<sub>4</sub>O [M + H]<sup>+</sup>, 369.1710; found, 369.1707.

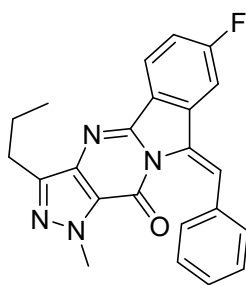

**(Z)-9-benzylidene-7-fluoro-1-methyl-3-propyl-1,9-dihydro-11H-pyrazolo[4',3':4,5]pyrimido[2,1-a]isoindol-11-one (6b)**

To a 10 mL Schlenk tube equipped with a magnetic stir bar was added 5-(2-bromo-4-fluorophenyl)-1-methyl-3-propyl-1,6-dihydro-7H-pyrazolo[4,3-*d*]pyrimidin-7-one **4b** (183 mg, 0.5 mmol, 1.0 equiv), ethynylbenzene **2a** (61 mg, 0.6 mmol, 1.2 equiv), DMF (4.0 mL), Cs<sub>2</sub>CO<sub>3</sub> (163 mg, 0.5 mmol, 1.0 equiv), *o*-phen (18 mg, 0.1 mmol, 0.2 equiv), CuI (10 mg, 0.05 mmol, 0.1 equiv). The reaction mixture was stirred at 80 °C in an oil bath for about 12 h. The resulting mixture was concentrated and the residue was taken up in ethyl acetate. The organic layer was washed with brine, dried over Na<sub>2</sub>SO<sub>4</sub> and concentrated. Purification of the crude product by column chromatography (silica gel; petroleum ether/ethyl acetate = 13:1) afforded **6b** in 59% yield (114 mg).

Yellow solid; mp 140–143 °C; **6b** : **5b** = 93 : 7; <sup>1</sup>H NMR (CDCl<sub>3</sub>, 400 MHz, Major Product **6b**): δ<sub>H</sub> 8.13–8.10 (m, 1H), 7.53–7.50 (m, 1H), 7.40–7.33 (m, 3H), 7.27–7.21 (m, 4H), 4.18 (s, 3H), 2.94 (t, *J* = 7.6 Hz, 2H), 1.93–1.84 (m, 2H), 1.08–1.04 (m, 3H); <sup>13</sup>C NMR (CDCl<sub>3</sub>, 101 MHz) δ<sub>C</sub> 165.0 (d, *J*<sub>C-F</sub> = 249.8 Hz), 151.0 (d, *J*<sub>C-F</sub> = 6.8 Hz), 146.1, 140.2 (d, *J*<sub>C-F</sub> = 10.0 Hz), 136.8, 135.8, 130.1, 129.5 (d, *J*<sub>C-F</sub> = 4.0 Hz), 128.9 (d, *J*<sub>C-F</sub> = 23.5 Hz), 128.2, 127.3, 125.4, 124.6 (d, *J*<sub>C-F</sub> = 9.5 Hz), 124.5, 117.4 (d, *J*<sub>C-F</sub> = 24.0 Hz), 116.9, 106.5 (d, *J*<sub>C-F</sub> = 24.9 Hz), 38.4, 27.8, 22.5, 14.1; HRMS (ESI-TOF, *m/z*): calcd for C<sub>23</sub>H<sub>20</sub>FN<sub>4</sub>O [M + H]<sup>+</sup>, 387.1616; found, 387.1616.

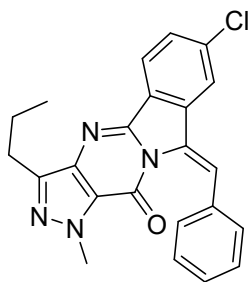

**(Z)-9-benzylidene-7-chloro-1-methyl-3-propyl-1,9-dihydro-11H-pyrazolo[4',3':4,5]pyrimido[2,1- $\alpha$ ]isoindol-11-one (6c)**

To a 10 mL Schlenk tube equipped with a magnetic stir bar was added 5-(2-bromo-4-chlorophenyl)-1-methyl-3-propyl-1,6-dihydro-7H-pyrazolo[4,3-*d*]pyrimidin-7-one **4c** (191 mg, 0.5 mmol, 1.0 equiv), ethynylbenzene **2a** (61 mg, 0.6 mmol, 1.2 equiv), DMF (4.0 mL), Cs<sub>2</sub>CO<sub>3</sub> (163 mg, 0.5 mmol, 1.0 equiv), *o*-phen (18 mg, 0.1 mmol, 0.2 equiv), CuI (10 mg, 0.05 mmol, 0.1 equiv). The reaction mixture was stirred at 80 °C in an oil bath for about 12 h. The resulting mixture was concentrated and the residue was taken up in ethyl acetate. The organic layer was washed with brine, dried over Na<sub>2</sub>SO<sub>4</sub> and concentrated. Purification of the crude product by column chromatography (silica gel; petroleum ether/ethyl acetate = 13:1) afforded **6c** in 64% yield (129 mg).

Yellow solid; mp 165–166 °C; **6c** : **5c** = 95 : 5; <sup>1</sup>H NMR (CDCl<sub>3</sub>, 400 MHz, Major Product **6c**):  $\delta_{\text{H}}$  8.09 (d, *J* = 8.0 Hz, 1H), 7.84 (s 1H), 7.52–7.49 (m, 1H), 7.40–7.35 (m, 3H), 7.26–7.20 (m, 3H), 4.18 (s, 3H), 2.95 (t, *J* = 7.6 Hz, 2H), 1.93–1.84 (m, 2H), 1.06 (t, *J* = 7.2 Hz, 3H); <sup>13</sup>C NMR (CDCl<sub>3</sub>, 101 MHz)  $\delta_{\text{C}}$  150.9, 146.2, 139.5, 137.7, 136.5, 135.7, 130.1, 129.7, 129.2, 128.3, 127.5, 127.3, 124.6, 123.9, 119.9, 117.1, 38.4, 27.7, 22.5, 14.1. HRMS (ESI-TOF, *m/z*): calcd for C<sub>23</sub>H<sub>20</sub>ClN<sub>4</sub>O [M + H]<sup>+</sup>, 403.1320; found, 403.1325.

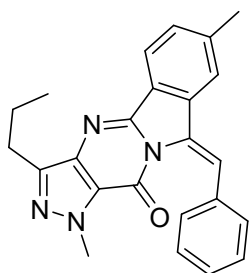

**(Z)-9-benzylidene-1,7-dimethyl-3-propyl-1,9-dihydro-11H-pyrazolo[4',3':4,5]pyrimido[2,1- $\alpha$ ]isoindol-11-one (6d)**

To a 10 mL Schlenk tube equipped with a magnetic stir bar was added 5-(2-bromo-4-methylphenyl)-1-methyl-3-propyl-1,6-dihydro-7H-pyrazolo[4,3-*d*]pyrimidin-7-one **4d** (181 mg, 0.5 mmol, 1.0 equiv),

ethynylbenzene **2a** (61 mg, 0.6 mmol, 1.2 equiv), DMF (4.0 mL), Cs<sub>2</sub>CO<sub>3</sub> (163 mg, 0.5 mmol, 1.0 equiv), *o*-phen (18 mg, 0.1 mmol, 0.2 equiv), CuI (10 mg, 0.05 mmol, 0.1 equiv). The reaction mixture was stirred at 80 °C in an oil bath for about 12 h. The resulting mixture was concentrated and the residue was taken up in ethyl acetate. The organic layer was washed with brine, dried over Na<sub>2</sub>SO<sub>4</sub> and concentrated. Purification of the crude product by column chromatography (silica gel; petroleum ether/ethyl acetate = 13:1) afforded **6d** in 56% yield (107 mg).

Yellow solid; mp 148–151 °C; <sup>1</sup>H NMR (CDCl<sub>3</sub>, 400 MHz): δ<sub>H</sub> 8.01 (d, *J* = 8.0 Hz, 1H), 7.66 (s, 1H), 7.38–7.31 (m, 4H), 7.26–7.20 (m, 3H), 4.17 (s, 3H), 2.95 (t, *J* = 7.6 Hz, 2H), 2.53 (s, 3H), 1.94–1.84 (m, 2H), 1.06 (t, *J* = 7.2 Hz, 3H); <sup>13</sup>C NMR (CDCl<sub>3</sub>, 101 MHz) δ<sub>C</sub> 152.0, 151.2, 146.0, 142.0, 138.4, 136.9, 136.3, 130.5, 130.3, 129.9, 127.8, 127.2, 126.9, 124.7, 122.3, 119.8, 115.6, 38.4, 27.7, 22.5, 22.1, 14.1; HRMS (ESI-TOF, *m/z*): calcd for C<sub>24</sub>H<sub>23</sub>N<sub>4</sub>O [M + H]<sup>+</sup>, 383.1866; found, 383.1875.

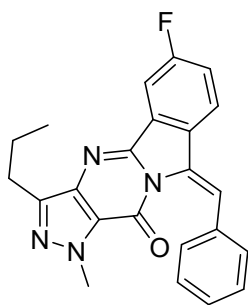

**(Z)-9-benzylidene-6-fluoro-1-methyl-3-propyl-1,9-dihydro-11H-pyrazolo[4',3':4,5]pyrimido[2,1- $\alpha$ ]isoindol-11-one (6e)**

To a 10 mL Schlenk tube equipped with a magnetic stir bar was added 5-(2-bromo-5-fluorophenyl)-1-methyl-3-propyl-1,6-dihydro-7H-pyrazolo[4,3-*d*]pyrimidin-7-one **4e** (183 mg, 0.5 mmol, 1.0 equiv), ethynylbenzene **2a** (61 mg, 0.6 mmol, 1.2 equiv), DMF (4.0 mL), Cs<sub>2</sub>CO<sub>3</sub> (163 mg, 0.5 mmol, 1.0 equiv), *o*-phen (18 mg, 0.1 mmol, 0.2 equiv), CuI (10 mg, 0.05 mmol, 0.1 equiv). The reaction mixture was stirred at 80 °C in an oil bath for about 12 h. The resulting mixture was concentrated and the residue was taken up in ethyl acetate. The organic layer was washed with brine, dried over Na<sub>2</sub>SO<sub>4</sub> and concentrated. Purification of the crude product by column chromatography (silica gel; petroleum ether/ethyl acetate = 13:1) afforded **6e** in 63% yield (122 mg).

Yellow solid; mp 154–155 °C; **6e** : **5e** = 97 : 3; <sup>1</sup>H NMR (CDCl<sub>3</sub>, 400 MHz, Major Product **6e**): δ<sub>H</sub> 7.84–7.77 (m, 2H), 7.39–7.26 (m, 4H), 7.21–7.20 (m, 3H), 4.18 (s, 3H), 2.95 (t, *J* = 7.6 Hz,



2H), 1.93–1.84 (m, 2H), 1.06 (t,  $J = 7.6$  Hz, 3H);  $^{13}\text{C}$  NMR ( $\text{CDCl}_3$ , 101 MHz)  $\delta_{\text{C}}$  163.4 (d,  $J_{\text{C-F}} = 247.9$  Hz), 150.9, 150.7 (d,  $J_{\text{C-F}} = 4.1$  Hz), 146.3, 136.7, 136.1, 134.0 (d,  $J_{\text{C-F}} = 2.4$  Hz), 131.1 (d,  $J_{\text{C-F}} = 9.8$  Hz), 129.9, 129.6, 128.0, 127.2, 124.8, 121.5 (d,  $J_{\text{C-F}} = 8.7$  Hz), 119.3 (d,  $J_{\text{C-F}} = 24.2$  Hz), 115.7 (d,  $J_{\text{C-F}} = 2.1$  Hz), 108.9 (d,  $J_{\text{C-F}} = 24.2$  Hz), 38.4, 27.7, 22.5, 14.0; HRMS (ESI-TOF,  $m/z$ ): calcd for  $\text{C}_{23}\text{H}_{20}\text{FN}_4\text{O}$  [ $\text{M} + \text{H}$ ] $^+$ , 387.1616; found, 387.1616.

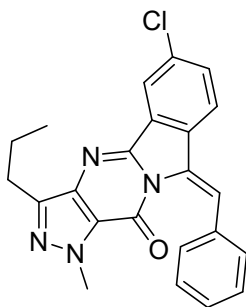

**(Z)-9-benzylidene-6-chloro-1-methyl-3-propyl-1,9-dihydro-11H-pyrazolo[4',3':4,5]pyrimido[2,1-a]isoindol-11-one (6f)**

To a 10 mL Schlenk tube equipped with a magnetic stir bar was added 5-(2-bromo-5-chlorophenyl)-1-methyl-3-propyl-1,6-dihydro-7H-pyrazolo[4,3-d]pyrimidin-7-one **4f** (191 mg, 0.5 mmol, 1.0 equiv), ethynylbenzene **2a** (61 mg, 0.6 mmol, 1.2 equiv), DMF (4.0 mL),  $\text{Cs}_2\text{CO}_3$  (163 mg, 0.5 mmol, 1.0 equiv), *o*-phen (18 mg, 0.1 mmol, 0.2 equiv), CuI (10 mg, 0.05 mmol, 0.1 equiv). The reaction mixture was stirred at 80 °C in an oil bath for about 12 h. The resulting mixture was concentrated and the residue was taken up in ethyl acetate. The organic layer was washed with brine, dried over  $\text{Na}_2\text{SO}_4$  and concentrated. Purification of the crude product by column chromatography (silica gel; petroleum ether/ethyl acetate = 13:1) afforded **6f** in 59% yield (119 mg).

Yellow solid; mp 186–188 °C; **6f** : **5f** = 93 : 7;  $^1\text{H}$  NMR ( $\text{CDCl}_3$ , 400 MHz, Major Product **6f**):  $\delta_{\text{H}}$  8.12 (s, 1H), 7.79–7.77 (m, 1H), 7.54 (d,  $J = 8.4$  Hz, 1H), 7.40–7.32 (m, 3H), 7.26–7.20 (m, 3H), 4.18 (s, 3H), 2.94 (t,  $J = 7.6$  Hz, 2H), 1.93–1.84 (m, 2H), 1.06 (t,  $J = 7.6$  Hz, 3H);  $^{13}\text{C}$  NMR ( $\text{CDCl}_3$ , 101 MHz)  $\delta_{\text{C}}$  150.9, 150.4, 146.3, 136.6, 136.3, 135.9, 135.3, 131.6, 130.6, 130.0, 129.5, 128.9, 128.1, 127.2, 124.8, 122.4, 120.9, 116.4, 38.4, 27.7, 22.5, 14.0; HRMS (ESI-TOF,  $m/z$ ): calcd for  $\text{C}_{23}\text{H}_{20}\text{ClN}_4\text{O}$  [ $\text{M} + \text{H}$ ] $^+$ , 403.1320; found, 403.1325.

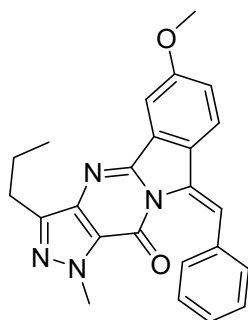

**(Z)-9-benzylidene-6-methoxy-1-methyl-3-propyl-1,9-dihydro-11H-pyrazolo[4',3':4,5]pyrimido[2,1-a]isoindol-11-one (6g)**

To a 10 mL Schlenk tube equipped with a magnetic stir bar was added 5-(2-bromo-5-methoxyphenyl)-1-methyl-3-propyl-1,6-dihydro-7H-pyrazolo[4,3-d]pyrimidin-7-one **4g** (188 mg, 0.5 mmol, 1.0 equiv), ethynylbenzene **2a** (61 mg, 0.6 mmol, 1.2 equiv), DMF (4.0 mL), Cs<sub>2</sub>CO<sub>3</sub> (163 mg, 0.5 mmol, 1.0 equiv), *o*-phen (18 mg, 0.1 mmol, 0.2 equiv), CuI (10 mg, 0.05 mmol, 0.1 equiv). The reaction mixture was stirred at 80 °C in an oil bath for about 12 h. The resulting mixture was concentrated and the residue was taken up in ethyl acetate. The organic layer was washed with brine, dried over Na<sub>2</sub>SO<sub>4</sub> and concentrated. Purification of the crude product by column chromatography (silica gel; petroleum ether/ethyl acetate = 13:1) afforded **6g** in 54% yield (108 mg). Yellow solid; mp 164–168 °C; **6g** : **5g** = 96 : 4; <sup>1</sup>H NMR (CDCl<sub>3</sub>, 400 MHz, Major Product **6g**): δ<sub>H</sub> 7.74 (d, *J* = 8.8 Hz, 1H), 7.55 (d, *J* = 2.4 Hz, 1H), 7.38–7.31 (m, 3H), 7.21–7.13 (m, 4H), 4.18 (s, 3H), 3.97 (s, 3H), 2.96 (t, *J* = 7.6 Hz, 2H), 1.94–1.85 (m, 2H), 1.07 (t, *J* = 7.6 Hz, 3H); <sup>13</sup>C NMR (CDCl<sub>3</sub>, 101 MHz) δ<sub>C</sub> 160.9, 151.8, 151.1, 146.0, 136.7, 136.4, 131.1, 130.6, 130.2, 129.9, 127.6, 127.2, 124.8, 120.9, 120.7, 114.3, 104.2, 55.9, 38.4, 27.7, 22.5, 14.1; HRMS (ESI-TOF, *m/z*): calcd for C<sub>24</sub>H<sub>23</sub>N<sub>4</sub>O<sub>2</sub> [M + H]<sup>+</sup>, 399.1816; found, 399.1824.

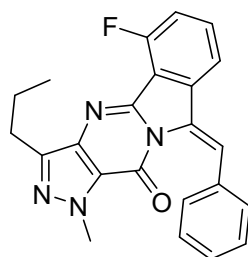

**(Z)-9-benzylidene-5-fluoro-1-methyl-3-propyl-1,9-dihydro-11H-pyrazolo[4',3':4,5]pyrimido[2,1-a]isoindol-11-one (6h)**

To a 10 mL Schlenk tube equipped with a magnetic stir bar was added 5-(2-bromo-6-fluorophenyl)-1-methyl-3-propyl-1,6-dihydro-7H-pyrazolo[4,3-d]pyrimidin-7-one **4h** (183 mg, 0.5 mmol, 1.0 equiv),

ethynylbenzene **2a** (61 mg, 0.6 mmol, 1.2 equiv), DMF (4.0 mL), Cs<sub>2</sub>CO<sub>3</sub> (163 mg, 0.5 mmol, 1.0 equiv), *o*-phen (18 mg, 0.1 mmol, 0.2 equiv), CuI (10 mg, 0.05 mmol, 0.1 equiv). The reaction mixture was stirred at 80 °C in an oil bath for about 12 h. The resulting mixture was concentrated and the residue was taken up in ethyl acetate. The organic layer was washed with brine, dried over Na<sub>2</sub>SO<sub>4</sub> and concentrated. Purification of the crude product by column chromatography (silica gel; petroleum ether/ethyl acetate = 13:1) afforded **6h** in 57% yield (110 mg).

Yellow solid; mp 192–193 °C; **6h** : **5h** = 96 : 4; <sup>1</sup>H NMR (CDCl<sub>3</sub>, 400 MHz, Major Product **6h**): δ<sub>H</sub> 7.67 (d, *J* = 8.0 Hz, 1H), 7.57–7.52 (m, 1H), 7.40–7.32 (m, 3H), 7.29 (s, 1H), 7.22–7.18 (m, 3H), 4.18 (s, 3H), 2.97 (t, *J* = 7.2 Hz, 2H), 1.95–1.85 (m, 2H), 1.06 (t, *J* = 7.6 Hz, 3H); <sup>13</sup>C NMR (CDCl<sub>3</sub>, 101 MHz) δ<sub>C</sub> 158.2 (d, *J*<sub>C-F</sub> = 259.6 Hz) 150.8, 149.0 (d, *J*<sub>C-F</sub> = 5.5 Hz), 146.6, 140.6 (d, *J*<sub>C-F</sub> = 3.0 Hz), 137.0, 135.9, 132.6 (d, *J*<sub>C-F</sub> = 7.6 Hz), 130.0, 129.6 (d, *J*<sub>C-F</sub> = 1.9 Hz), 128.9 (d, *J*<sub>C-F</sub> = 9.5 Hz), 128.2, 127.2, 124.4, 117.0 (d, *J*<sub>C-F</sub> = 13.4 Hz), 116.9, 116.1 (d, *J*<sub>C-F</sub> = 19.1 Hz), 115.4 (d, *J*<sub>C-F</sub> = 4.1 Hz), 38.4, 27.7, 22.3, 14.0; HRMS (ESI-TOF, *m/z*): calcd for C<sub>23</sub>H<sub>20</sub>FN<sub>4</sub>O [M + H]<sup>+</sup>, 387.1616; found, 387.1616.

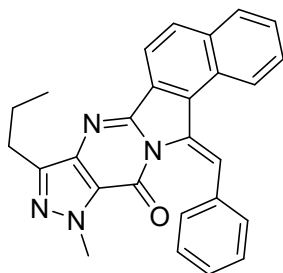

**(Z)-11-benzylidene-1-methyl-3-propyl-1,11-dihydro-13H-benzo[*f*]pyrazolo[4',3':4,5]pyrimido[2,1-*a*]isoindol-13-one (**6i**)**

To a 10 mL Schlenk tube equipped with a magnetic stir bar was added 5-(1-bromonaphthalen-2-yl)-1-methyl-3-propyl-1,6-dihydro-7*H*-pyrazolo[4,3-*d*]pyrimidin-7-one **4i** (198 mg, 0.5 mmol, 1.0 equiv), ethynylbenzene **2a** (61 mg, 0.6 mmol, 1.2 equiv), DMF (4.0 mL), Cs<sub>2</sub>CO<sub>3</sub> (163 mg, 0.5 mmol, 1.0 equiv), *o*-phen (18 mg, 0.1 mmol, 0.2 equiv), CuI (10 mg, 0.05 mmol, 0.1 equiv). The reaction mixture was stirred at 80 °C in an oil bath for about 12 h. The resulting mixture was concentrated and the residue was taken up in ethyl acetate. The organic layer was washed with brine, dried over Na<sub>2</sub>SO<sub>4</sub> and concentrated. Purification of the crude product by column chromatography (silica gel; petroleum ether/ethyl acetate = 13:1) afforded **6i** in 58% yield (121 mg).

Yellow solid; mp 202–203 °C;  $^1\text{H}$  NMR ( $\text{CDCl}_3$ , 400 MHz):  $\delta_{\text{H}}$  8.64 (d,  $J$  = 8.8 Hz, 1H), 8.20–8.17 (m, 1H), 8.02–7.95 (m, 2H), 7.82 (s, 1H), 7.76–7.72 (m, 1H), 7.64 (t,  $J$  = 7.6 Hz, 1H), 7.40–7.31 (m, 5H), 4.16 (s, 3H), 2.99 (t,  $J$  = 7.6 Hz, 2H), 1.97–1.88 (m, 2H), 1.09 (t,  $J$  = 7.2 Hz, 3H);  $^{13}\text{C}$  NMR ( $\text{CDCl}_3$ , 101 MHz)  $\delta_{\text{C}}$  152.1, 151.1, 146.1, 137.0, 136.7, 135.8, 134.8, 132.5, 130.7, 130.1, 129.1, 128.5, 128.3, 127.7, 127.4, 126.7, 124.7, 124.2, 121.3, 118.8, 38.3, 27.8, 22.5, 14.1; HRMS (ESI-TOF,  $m/z$ ): calcd for  $\text{C}_{27}\text{H}_{23}\text{N}_4\text{O}$  [ $\text{M} + \text{H}$ ] $^+$ , 419.1866; found, 419.1870.

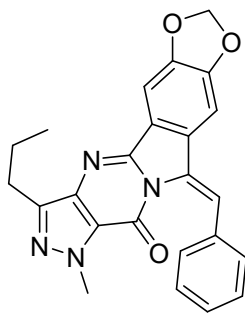

**(Z)-10-benzylidene-1-methyl-3-propyl-1,10-dihydro-12H-[1,3]dioxolo[4,5-f]pyrazolo[4',3':4,5]pyrimido[2,1-a]isoindol-12-one (6j)**

To a 10 mL Schlenk tube equipped with a magnetic stir bar was added 5-(6-bromobenzo[*d*][1,3]dioxol-5-yl)-1-methyl-3-propyl-1,6-dihydro-7*H*-pyrazolo[4,3-*d*]pyrimidin-7-one **4j** (195 mg, 0.5 mmol, 1.0 equiv), ethynylbenzene **2a** (61 mg, 0.6 mmol, 1.2 equiv), DMF (4.0 mL),  $\text{Cs}_2\text{CO}_3$  (163 mg, 0.5 mmol, 1.0 equiv), *o*-phen (18 mg, 0.1 mmol, 0.2 equiv), CuI (10 mg, 0.05 mmol, 0.1 equiv). The reaction mixture was stirred at 80 °C in an oil bath for about 12 h. The resulting mixture was concentrated and the residue was taken up in ethyl acetate. The organic layer was washed with brine, dried over  $\text{Na}_2\text{SO}_4$  and concentrated. Purification of the crude product by column chromatography (silica gel; petroleum ether/ethyl acetate = 13:1) afforded **6j** in 60% yield (124 mg).

Yellow solid; mp 164–166 °C; **6j** : **5j** = 91 : 9;  $^1\text{H}$  NMR ( $\text{CDCl}_3$ , 400 MHz, Major Product **6j**):  $\delta_{\text{H}}$  7.46 (s, 1H), 7.38–7.32 (m, 3H), 7.20–7.18 (m, 3H), 7.05 (s, 1H), 6.12 (s, 2H), 4.16 (s, 3H), 2.93 (t,  $J$  = 7.6 Hz, 2H), 1.92–1.83 (m, 2H), 1.07–1.04 (m, 3H);  $^{13}\text{C}$  NMR ( $\text{CDCl}_3$ , 101 MHz)  $\delta_{\text{C}}$  151.7, 151.5, 151.0, 149.6, 145.9, 136.9, 136.2, 133.8, 130.2, 129.9, 129.0, 128.9, 127.8, 127.2, 124.4, 123.9, 114.9, 102.2, 101.6, 99.5, 38.3, 27.7, 22.5, 14.1; HRMS (ESI-TOF,  $m/z$ ): calcd for  $\text{C}_{24}\text{H}_{21}\text{N}_4\text{O}_3$  [ $\text{M} + \text{H}$ ] $^+$ , 413.1609; found, 413.1623.

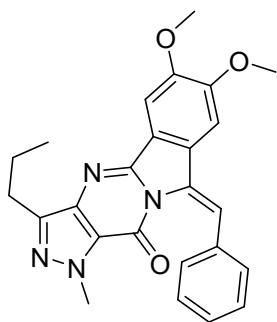

**(Z)-9-benzylidene-6,7-dimethoxy-1-methyl-3-propyl-1,9-dihydro-11H-pyrazolo[4',3':4,5]pyrimido[2,1-a]isoindol-11-one (6k)**

To a 10 mL Schlenk tube equipped with a magnetic stir bar was added 5-(2-bromo-4,5-dimethoxyphenyl)-1-methyl-3-propyl-1,6-dihydro-7H-pyrazolo[4,3-d]pyrimidin-7-one **4k** (203 mg, 0.5 mmol, 1.0 equiv), ethynylbenzene **2a** (61 mg, 0.6 mmol, 1.2 equiv), DMF (4.0 mL), Cs<sub>2</sub>CO<sub>3</sub> (163 mg, 0.5 mmol, 1.0 equiv), *o*-phen (18 mg, 0.1 mmol, 0.2 equiv), CuI (10 mg, 0.05 mmol, 0.1 equiv). The reaction mixture was stirred at 80 °C in an oil bath for about 12 h. The resulting mixture was concentrated and the residue was taken up in ethyl acetate. The organic layer was washed with brine, dried over Na<sub>2</sub>SO<sub>4</sub> and concentrated. Purification of the crude product by column chromatography (silica gel; petroleum ether/ethyl acetate = 13:1) afforded **6k** in 55% yield (118 mg). Yellow solid; mp 229–232 °C; **6k** : **5k** = 91 : 9; <sup>1</sup>H NMR (CDCl<sub>3</sub>, 400 MHz, Major Product **6k**): δ<sub>H</sub> 7.51–7.49 (m, 1H), 7.38–7.30 (m, 3H), 7.24–7.21 (m, 3H), 7.10 (d, *J* = 2.4 Hz, 1H), 4.17 (s, 3H), 4.05 (s, 6H), 2.94 (t, *J* = 8.0 Hz, 2H), 1.94–1.84 (m, 2H), 1.07 (t, *J* = 7.6 Hz, 3H); <sup>13</sup>C NMR (CDCl<sub>3</sub>, 101 MHz) δ<sub>C</sub> 152.8, 152.1, 151.2, 151.1, 145.7, 136.8, 136.3, 131.8, 130.3, 129.9, 129.1, 128.7, 127.7, 127.2, 124.5, 122.1, 114.5, 103.4, 101.2, 56.4, 56.3, 38.3, 27.7, 22.5, 14.1; HRMS (ESI-TOF, *m/z*): calcd for C<sub>25</sub>H<sub>25</sub>N<sub>4</sub>O<sub>3</sub> [M + H]<sup>+</sup>, 429.1921; found, 429.1947.

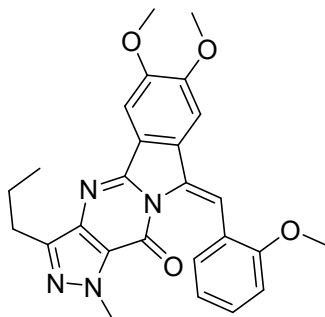

**(Z)-6,7-dimethoxy-9-(2-methoxybenzylidene)-1-methyl-3-propyl-1,9-dihydro-11H-pyrazolo[4',3':4,5]pyrimido[2,1-a]isoindol-11-one (6l)**

To a 10 mL Schlenk tube equipped with a magnetic stir bar was added 5-(2-bromo-4,5-dimethoxyphenyl)-1-methyl-3-propyl-1,6-dihydro-7H-pyrazolo[4,3-d]pyrimidin-7-one **4k** (203 mg, 0.5 mmol, 1.0 equiv), 1-ethynyl-2-methoxybenzene **2e** (79 mg, 0.6 mmol, 1.2 equiv), DMF (4.0 mL), Cs<sub>2</sub>CO<sub>3</sub> (163 mg, 0.5 mmol, 1.0 equiv), *o*-phen (18 mg, 0.1 mmol, 0.2 equiv), CuI (10 mg, 0.05 mmol, 0.1 equiv). The reaction mixture was stirred at 80 °C in an oil bath for about 12 h. The resulting mixture was concentrated and the residue was taken up in ethyl acetate. The organic layer was washed with brine, dried over Na<sub>2</sub>SO<sub>4</sub> and concentrated. Purification of the crude product by column chromatography (silica gel; petroleum ether/ethyl acetate = 13:1) afforded **6l** in 49% yield (112 mg). Yellow solid; mp 163–166 °C; **6l** : **5l** = 94 : 6; <sup>1</sup>H NMR (CDCl<sub>3</sub>, 400 MHz, Major Product **6l**): δ<sub>H</sub> 7.51 (s, 1H), 7.38–7.33 (m, 1H), 7.27 (s, 1H), 7.15–7.13 (m, 2H), 6.99–6.91 (m, 2H), 4.16 (s, 3H), 4.06–4.05 (m, 6H), 3.74 (s, 3H), 2.94 (t, *J* = 7.6 Hz, 2H), 1.94–1.85 (m, 2H), 1.07 (t, *J* = 7.6 Hz, 3H); <sup>13</sup>C NMR (CDCl<sub>3</sub>, 101 MHz) δ<sub>C</sub> 156.7, 152.7, 151.8, 151.0, 150.9, 145.7, 136.9, 131.9, 131.2, 130.9, 129.5, 125.8, 124.7, 121.9, 119.4, 110.2, 109.8, 103.3, 101.5, 56.4, 56.3, 55.0, 38.3, 27.8, 22.5, 14.1; HRMS (ESI-TOF, *m/z*): calcd for C<sub>26</sub>H<sub>27</sub>N<sub>4</sub>O<sub>4</sub> [M + H]<sup>+</sup>, 459.2027; found, 459.2057.

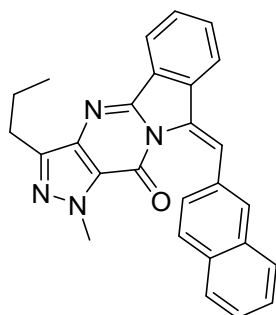

**(Z)-1-methyl-9-(naphthalen-2-ylmethylene)-3-propyl-1,9-dihydro-11H-pyrazolo[4',3':4,5]pyrimido[2,1-a]isoindol-11-one (6m)**

To a 10 mL Schlenk tube equipped with a magnetic stir bar was added 5-(2-bromophenyl)-1-methyl-3-propyl-1,6-dihydro-7H-pyrazolo[4,3-d]pyrimidin-7-one **4a** (174 mg, 0.5 mmol, 1.0 equiv), 2-ethynyl-naphthalene **2u** (91 mg, 0.6 mmol, 1.2 equiv), DMF (4.0 mL), Cs<sub>2</sub>CO<sub>3</sub> (163 mg, 0.5 mmol, 1.0 equiv), *o*-phen (18 mg, 0.1 mmol, 0.2 equiv), CuI (10 mg, 0.05 mmol, 0.1 equiv). The reaction mixture was stirred at 80 °C in an oil bath for about 12 h. The resulting mixture was concentrated and the

residue was taken up in ethyl acetate. The organic layer was washed with brine, dried over Na<sub>2</sub>SO<sub>4</sub> and concentrated. Purification of the crude product by column chromatography (silica gel; petroleum ether/ethyl acetate = 13:1) afforded **6m** in 48% yield (100 mg).

Yellow solid; mp 208–209 °C; **6m** : **5m** = 97 : 3; <sup>1</sup>H NMR (CDCl<sub>3</sub>, 400 MHz, Major Product **6m**): δ<sub>H</sub> 8.17 (d, *J* = 7.6 Hz, 1H), 7.91 (d, *J* = 7.6 Hz, 1H), 7.86–7.84 (m, 1H), 7.81–7.78 (m, 2H), 7.66–7.46 (m, 5H), 7.43 (s, 1H), 7.37–7.34 (m, 1H), 4.12 (s, 3H), 2.98 (t, *J* = 7.6 Hz, 2H), 1.96–1.87 (m, 2H), 1.08 (t, *J* = 7.6 Hz, 3H); <sup>13</sup>C NMR (CDCl<sub>3</sub>, 101 MHz) δ<sub>C</sub> 151.8, 151.2, 146.2, 138.1, 136.9, 133.7, 132.8, 132.5, 131.4, 130.5, 129.6, 129.3, 129.2, 128.2, 127.72, 127.65, 126.5, 126.4, 126.2, 124.8, 122.6, 119.6, 115.9, 38.3, 27.8, 22.5, 14.1; HRMS (ESI-TOF, *m/z*): calcd for C<sub>27</sub>H<sub>23</sub>N<sub>4</sub>O [M + H]<sup>+</sup>, 419.1866; found, 419.1870.

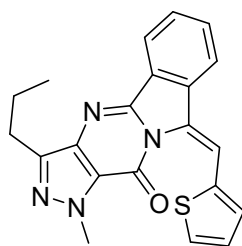

**(Z)-1-methyl-3-propyl-9-(thiophen-2-ylmethylene)-1,9-dihydro-11H-pyrazolo[4',3':4,5]pyrimido[2,1-a]isoindol-11-one (6n)**

To a 10 mL Schlenk tube equipped with a magnetic stir bar was added 5-(2-bromophenyl)-1-methyl-3-propyl-1,6-dihydro-7H-pyrazolo[4,3-d]pyrimidin-7-one **4a** (174 mg, 0.5 mmol, 1.0 equiv), 2-ethynylthiophene **2v** (65 mg, 0.6 mmol, 1.2 equiv), DMF (4.0 mL), Cs<sub>2</sub>CO<sub>3</sub> (163 mg, 0.5 mmol, 1.0 equiv), *o*-phen (18 mg, 0.1 mmol, 0.2 equiv), CuI (10 mg, 0.05 mmol, 0.1 equiv). The reaction mixture was stirred at 80 °C in an oil bath for about 12 h. The resulting mixture was concentrated and the residue was taken up in ethyl acetate. The organic layer was washed with brine, dried over Na<sub>2</sub>SO<sub>4</sub> and concentrated. Purification of the crude product by column chromatography (silica gel; petroleum ether/ethyl acetate = 13:1) afforded **6n** in 50% yield (94 mg).

Yellow solid; mp 128–131 °C; **6n** : **5n** = 93 : 7; <sup>1</sup>H NMR (CDCl<sub>3</sub>, 400 MHz, Major Product **6n**): δ<sub>H</sub> 8.13 (d, *J* = 7.6 Hz, 1H), 7.84–7.82 (m, 1H), 7.61–7.50 (m, 3H), 7.34 (s, 1H), 7.13–7.10 (m, 1H), 6.94 (d, *J* = 4.0 Hz, 1H), 4.29 (s, 3H), 2.97 (t, *J* = 7.6 Hz, 2H), 1.95–1.86 (m, 2H), 1.06 (t, *J* = 7.6 Hz, 3H); <sup>13</sup>C NMR (CDCl<sub>3</sub>, 101 MHz) δ<sub>C</sub> 151.5, 151.0, 146.1, 138.2, 138.1, 136.9, 131.5, 131.3, 129.0, 128.9, 128.7, 126.9, 124.7, 122.6, 119.4, 108.7, 38.4, 27.7, 22.5, 14.0; HRMS (ESI-TOF, *m/z*): calcd for C<sub>21</sub>H<sub>19</sub>N<sub>4</sub>OS [M + H]<sup>+</sup>, 375.1274; found, 375.1280.

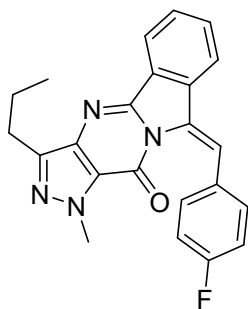

**(Z)-9-(4-fluorobenzylidene)-1-methyl-3-propyl-1,9-dihydro-11H-pyrazolo[4',3':4,5]pyrimido[2,1-a]isoindol-11-one (6o)**

To a 10 mL Schlenk tube equipped with a magnetic stir bar was added 5-(2-bromophenyl)-1-methyl-3-propyl-1,6-dihydro-7H-pyrazolo[4,3-d]pyrimidin-7-one **4a** (174 mg, 0.5 mmol, 1.0 equiv), 1-ethynyl-4-fluorobenzene **2k** (72 mg, 0.6 mmol, 1.2 equiv), DMF (4.0 mL), Cs<sub>2</sub>CO<sub>3</sub> (163 mg, 0.5 mmol, 1.0 equiv), *o*-phen (18 mg, 0.1 mmol, 0.2 equiv), CuI (10 mg, 0.05 mmol, 0.1 equiv). The reaction mixture was stirred at 80 °C in an oil bath for about 12 h. The resulting mixture was concentrated and the residue was taken up in ethyl acetate. The organic layer was washed with brine, dried over Na<sub>2</sub>SO<sub>4</sub> and concentrated. Purification of the crude product by column chromatography (silica gel; petroleum ether/ethyl acetate = 13:1) afforded **6o** in 59% yield (114 mg).

Yellow solid; mp 165–169 °C; **6o** : **5o** = 98 : 2; <sup>1</sup>H NMR (CDCl<sub>3</sub>, 400 MHz, Major Product **6o**): δ<sub>H</sub> 8.14 (d, *J* = 7.6 Hz, 1H), 7.86 (d, *J* = 7.6 Hz, 1H), 7.63–7.53 (m, 2H), 7.22–7.18 (m, 3H), 7.06 (t, *J* = 8.4 Hz, 2H), 4.20 (s, 3H), 2.96 (t, *J* = 7.6 Hz, 2H), 1.94–1.85 (m, 2H), 1.06 (t, *J* = 7.6 Hz, 3H); <sup>13</sup>C NMR (CDCl<sub>3</sub>, 101 MHz) δ<sub>C</sub> 162.1 (d, *J*<sub>C-F</sub> = 247.4 Hz), 151.7, 151.1, 146.2, 138.0, 136.9, 132.3 (d, *J*<sub>C-F</sub> = 3.4 Hz), 131.7 (d, *J*<sub>C-F</sub> = 8.3 Hz), 131.4, 130.3 (d, *J*<sub>C-F</sub> = 1.1 Hz), 129.3, 129.2, 124.7, 122.6, 119.6, 114.7, 114.3 (d, *J*<sub>C-F</sub> = 21.9 Hz), 38.4, 27.7, 22.5, 14.1; HRMS (ESI-TOF, *m/z*): calcd for C<sub>23</sub>H<sub>20</sub>FN<sub>4</sub>O [M + H]<sup>+</sup>, 387.1616; found, 387.1616.

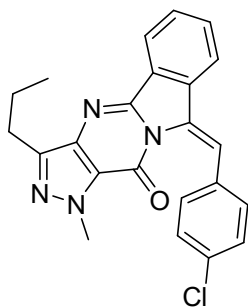



**(Z)-9-(4-chlorobenzylidene)-1-methyl-3-propyl-1,9-dihydro-11H-pyrazolo[4',3':4,5]pyrimido[2,1- $\alpha$ ]isoindol-11-one (6p)**

To a 10 mL Schlenk tube equipped with a magnetic stir bar was added 5-(2-bromophenyl)-1-methyl-3-propyl-1,6-dihydro-7H-pyrazolo[4,3-*d*]pyrimidin-7-one **4a** (174 mg, 0.5 mmol, 1.0 equiv), 1-chloro-4-ethynylbenzene **2l** (82 mg, 0.6 mmol, 1.2 equiv), DMF (4.0 mL), Cs<sub>2</sub>CO<sub>3</sub> (163 mg, 0.5 mmol, 1.0 equiv), *o*-phen (18 mg, 0.1 mmol, 0.2 equiv), CuI (10 mg, 0.05 mmol, 0.1 equiv). The reaction mixture was stirred at 80 °C in an oil bath for about 12 h. The resulting mixture was concentrated and the residue was taken up in ethyl acetate. The organic layer was washed with brine, dried over Na<sub>2</sub>SO<sub>4</sub> and concentrated. Purification of the crude product by column chromatography (silica gel; petroleum ether/ethyl acetate = 13:1) afforded **6p** in 60% yield (121 mg).

Yellow solid; mp 224–227 °C; <sup>1</sup>H NMR (CDCl<sub>3</sub>, 400 MHz):  $\delta_{\text{H}}$  8.13 (d, *J* = 7.6 Hz, 1H), 7.84 (d, *J* = 7.6 Hz, 1H), 7.62–7.53 (m, 2H), 7.34–7.32 (m, 2H), 7.18 (s, 1H), 7.14–7.12 (m, 2H), 4.20 (s, 3H), 2.95 (t, *J* = 7.6 Hz, 2H), 1.94–1.84 (m, 2H), 1.06 (t, *J* = 7.2 Hz, 3H); <sup>13</sup>C NMR (CDCl<sub>3</sub>, 101 MHz)  $\delta_{\text{C}}$  151.6, 151.1, 146.2, 137.8, 136.9, 134.7, 133.6, 131.4, 131.2, 130.7, 129.4, 129.3, 127.4, 124.6, 122.6, 119.6, 114.4, 38.4, 27.7, 22.5, 14.1; HRMS (ESI-TOF, *m/z*): calcd for C<sub>23</sub>H<sub>20</sub>ClN<sub>4</sub>O [M + H]<sup>+</sup>, 403.1320; found, 403.1325.

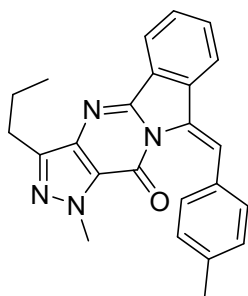

**(Z)-1-methyl-9-(4-methylbenzylidene)-3-propyl-1,9-dihydro-11H-pyrazolo[4',3':4,5]pyrimido[2,1- $\alpha$ ]isoindol-11-one (6q)**

To a 10 mL Schlenk tube equipped with a magnetic stir bar was added 5-(2-bromophenyl)-1-methyl-3-propyl-1,6-dihydro-7H-pyrazolo[4,3-*d*]pyrimidin-7-one **4a** (174 mg, 0.5 mmol, 1.0 equiv), 1-ethynyl-4-methylbenzene **2n** (70 mg, 0.6 mmol, 1.2 equiv), DMF (4.0 mL), Cs<sub>2</sub>CO<sub>3</sub> (163 mg, 0.5 mmol, 1.0 equiv), *o*-phen (18 mg, 0.1 mmol, 0.2 equiv), CuI (10 mg, 0.05 mmol, 0.1 equiv). The reaction mixture was stirred at 80 °C in an oil bath for about 12 h. The resulting mixture was concentrated and the residue was taken up in ethyl acetate. The organic layer was washed with brine, dried over

Na<sub>2</sub>SO<sub>4</sub> and concentrated. Purification of the crude product by column chromatography (silica gel; petroleum ether/ethyl acetate = 13:1) afforded **6q** in 56% yield (107 mg).

Yellow solid; mp 139–142 °C; **6q** : **5q** = 98 : 2; <sup>1</sup>H NMR (CDCl<sub>3</sub>, 400 MHz, Major Product **6q**): δ<sub>H</sub> 8.13 (d, *J* = 7.6 Hz, 1H), 7.85 (d, *J* = 8.0 Hz, 1H), 7.60–7.50 (m, 2H), 7.26–7.24 (m, 1H), 7.18–7.10 (m, 4H), 4.21 (s, 3H), 2.96 (t, *J* = 7.6 Hz, 2H), 2.41 (s, 3H), 1.95–1.85 (m, 2H), 1.07 (t, *J* = 7.2 Hz, 3H); <sup>13</sup>C NMR (CDCl<sub>3</sub>, 101 MHz) δ<sub>C</sub> 151.8, 151.1, 146.1, 138.3, 138.0, 136.9, 133.2, 131.3, 130.1, 129.6, 129.1, 128.9, 128.0, 124.8, 122.5, 119.5, 116.1, 38.4, 27.8, 22.5, 21.6, 14.1; HRMS (ESI-TOF, *m/z*): calcd for C<sub>24</sub>H<sub>23</sub>N<sub>4</sub>O [M + H]<sup>+</sup>, 383.1866; found, 383.1875.

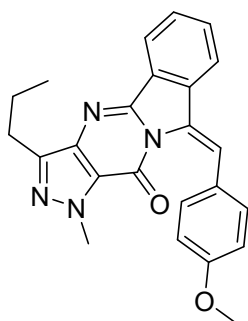

**(Z)-9-(4-methoxybenzylidene)-1-methyl-3-propyl-1,9-dihydro-11H-pyrazolo[4',3':4,5]pyrimido[2,1- $\alpha$ ]isoindol-11-one (**6r**)**

To a 10 mL Schlenk tube equipped with a magnetic stir bar was added 5-(2-bromophenyl)-1-methyl-3-propyl-1,6-dihydro-7H-pyrazolo[4,3-*d*]pyrimidin-7-one **4a** (174 mg, 0.5 mmol, 1.0 equiv), 1-ethynyl-4-methoxybenzene **2o** (79 mg, 0.6 mmol, 1.2 equiv), DMF (4.0 mL), Cs<sub>2</sub>CO<sub>3</sub> (163 mg, 0.5 mmol, 1.0 equiv), *o*-phen (18 mg, 0.1 mmol, 0.2 equiv), CuI (10 mg, 0.05 mmol, 0.1 equiv). The reaction mixture was stirred at 80 °C in an oil bath for about 12 h. The resulting mixture was concentrated and the residue was taken up in ethyl acetate. The organic layer was washed with brine, dried over Na<sub>2</sub>SO<sub>4</sub> and concentrated. Purification of the crude product by column chromatography (silica gel; petroleum ether/ethyl acetate = 13:1) afforded **6r** in 63% yield (126 mg).

Yellow solid; mp 135–137 °C; **6r** : **5r** = 91 : 9; <sup>1</sup>H NMR (CDCl<sub>3</sub>, 400 MHz, Major Product **6r**): δ<sub>H</sub> 8.14 (d, *J* = 7.6 Hz, 1H), 7.86 (d, *J* = 8.0 Hz, 1H), 7.61–7.50 (m, 2H), 7.27–7.24 (m, 1H), 7.20–7.17 (m, 2H), 6.93–6.89 (m, 2H), 4.22 (s, 3H), 3.87 (s, 3H), 3.00–2.95 (m, 2H), 1.94–1.87 (m, 2H), 1.10–1.05 (m, 3H). <sup>13</sup>C NMR (CDCl<sub>3</sub>, 101 MHz) δ<sub>C</sub> 159.4, 151.9, 151.1, 146.1, 138.4, 136.9, 131.8, 131.3, 128.9, 128.82, 128.77, 128.7, 124.7, 122.5, 119.4, 116.0, 112.7, 55.2,

38.4, 27.8, 22.5, 14.1; HRMS (ESI-TOF,  $m/z$ ): calcd for  $C_{24}H_{23}N_4O_2$   $[M + H]^+$ , 399.1816; found, 399.1824.

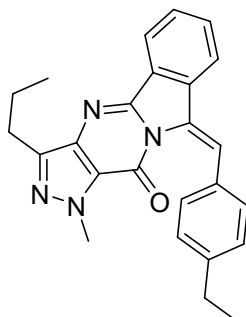

**(Z)-9-(4-ethylbenzylidene)-1-methyl-3-propyl-1,9-dihydro-11H-pyrazolo[4',3':4,5]pyrimido[2,1-a]isoindol-11-one (6s)**

To a 10 mL Schlenk tube equipped with a magnetic stir bar was added 5-(2-bromophenyl)-1-methyl-3-propyl-1,6-dihydro-7H-pyrazolo[4,3-d]pyrimidin-7-one **4a** (174 mg, 0.5 mmol, 1.0 equiv), 1-ethyl-4-ethynylbenzene **2p** (78 mg, 0.6 mmol, 1.2 equiv), DMF (4.0 mL),  $Cs_2CO_3$  (163 mg, 0.5 mmol, 1.0 equiv), *o*-phen (18 mg, 0.1 mmol, 0.2 equiv), CuI (10 mg, 0.05 mmol, 0.1 equiv). The reaction mixture was stirred at 80 °C in an oil bath for about 12 h. The resulting mixture was concentrated and the residue was taken up in ethyl acetate. The organic layer was washed with brine, dried over  $Na_2SO_4$  and concentrated. Purification of the crude product by column chromatography (silica gel; petroleum ether/ethyl acetate = 13:1) afforded **6s** in 63% yield (125 mg).

Yellow solid; mp 115–118 °C;  $^1H$  NMR ( $CDCl_3$ , 400 MHz):  $\delta_H$  8.13 (d,  $J = 7.6$  Hz, 1H), 7.84 (d,  $J = 6.8$  Hz, 1H), 7.60–7.50 (m, 2H), 7.24 (s, 1H), 7.21–7.13 (m, 4H), 4.20 (s, 3H), 2.96 (t,  $J = 7.6$  Hz, 2H), 2.74–2.68 (m, 2H), 1.95–1.85 (m, 2H), 1.28 (t,  $J = 7.6$  Hz, 3H), 1.07 (t,  $J = 7.6$  Hz, 3H);  $^{13}C$  NMR ( $CDCl_3$ , 101 MHz)  $\delta_C$  151.8, 151.1, 146.1, 144.2, 138.3, 136.9, 133.4, 131.3, 130.2, 129.6, 129.1, 128.9, 126.7, 124.8, 122.5, 119.5, 116.1, 38.4, 28.8, 27.8, 22.5, 15.1, 14.1; HRMS (ESI-TOF,  $m/z$ ): calcd for  $C_{25}H_{25}N_4O$   $[M + H]^+$ , 397.2023; found, 397.2034.

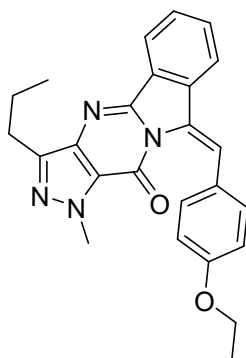

**(Z)-9-(4-ethoxybenzylidene)-1-methyl-3-propyl-1,9-dihydro-11H-pyrazolo[4',3':4,5]pyrimido[2,1- $\alpha$ ]isoindol-11-one (6t)**

To a 10 mL Schlenk tube equipped with a magnetic stir bar was added 5-(2-bromophenyl)-1-methyl-3-propyl-1,6-dihydro-7H-pyrazolo[4,3-*d*]pyrimidin-7-one **4a** (174 mg, 0.5 mmol, 1.0 equiv), 1-ethoxy-4-ethynylbenzene **2q** (88 mg, 0.6 mmol, 1.2 equiv), DMF (4.0 mL), Cs<sub>2</sub>CO<sub>3</sub> (163 mg, 0.5 mmol, 1.0 equiv), *o*-phen (18 mg, 0.1 mmol, 0.2 equiv), CuI (10 mg, 0.05 mmol, 0.1 equiv). The reaction mixture was stirred at 80 °C in an oil bath for about 12 h. The resulting mixture was concentrated and the residue was taken up in ethyl acetate. The organic layer was washed with brine, dried over Na<sub>2</sub>SO<sub>4</sub> and concentrated. Purification of the crude product by column chromatography (silica gel; petroleum ether/ethyl acetate = 13:1) afforded **6t** in 60% yield (124 mg).

Yellow solid; mp 91–93 °C; **6t** : **5t** = 91 : 9; <sup>1</sup>H NMR (CDCl<sub>3</sub>, 400 MHz, Major Product **6t**):  $\delta_{\text{H}}$  8.13 (d, *J* = 7.6 Hz, 1H), 7.85–7.83 (m, 1H), 7.60–7.49 (m, 2H), 7.22 (s, 1H), 7.16–7.14 (m, 2H), 6.89–6.87 (m, 2H), 4.22 (s, 3H), 4.12–4.06 (m, 2H), 2.97 (t, *J* = 6.8 Hz, 2H), 1.95–1.86 (m, 2H), 1.45 (t, *J* = 6.8 Hz, 3H), 1.07 (t, *J* = 7.6 Hz, 3H); <sup>13</sup>C NMR (CDCl<sub>3</sub>, 101 MHz)  $\delta_{\text{C}}$  158.8, 151.8, 151.1, 146.0, 138.4, 136.9, 131.9, 131.2, 130.5, 128.9, 128.7, 128.4, 124.7, 122.5, 119.3, 116.0, 114.7, 113.2, 63.4, 38.4, 27.8, 22.5, 14.8, 14.1; HRMS (ESI-TOF, *m/z*): calcd for C<sub>25</sub>H<sub>25</sub>N<sub>4</sub>O<sub>2</sub> [M + H]<sup>+</sup>, 413.1972; found, 413.1984.

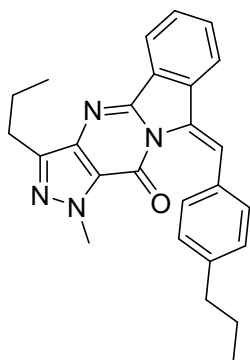

**(Z)-1-methyl-3-propyl-9-(4-propylbenzylidene)-1,9-dihydro-11H-pyrazolo[4',3':4,5]pyrimido[2,1- $\alpha$ ]isoindol-11-one (6u)**

To a 10 mL Schlenk tube equipped with a magnetic stir bar was added 5-(2-bromophenyl)-1-methyl-3-propyl-1,6-dihydro-7H-pyrazolo[4,3-*d*]pyrimidin-7-one **4a** (174 mg, 0.5 mmol, 1.0 equiv), 1-ethynyl-4-propylbenzene **2r** (87 mg, 0.6 mmol, 1.2 equiv), DMF (4.0 mL), Cs<sub>2</sub>CO<sub>3</sub> (163 mg, 0.5 mmol, 1.0 equiv), *o*-phen (18 mg, 0.1 mmol, 0.2 equiv), CuI (10 mg, 0.05 mmol, 0.1 equiv). The reaction mixture was stirred at 80 °C in an oil bath for about 12 h. The resulting mixture was concentrated

and the residue was taken up in ethyl acetate. The organic layer was washed with brine, dried over  $\text{Na}_2\text{SO}_4$  and concentrated. Purification of the crude product by column chromatography (silica gel; petroleum ether/ethyl acetate = 13:1) afforded **6u** in 60% yield (123 mg).

Yellow solid; mp 120–121 °C; **6u** : **5u** = 93 : 7;  $^1\text{H}$  NMR ( $\text{CDCl}_3$ , 400 MHz, Major Product **6u**):  $\delta_{\text{H}}$  8.13 (d,  $J$  = 7.6 Hz, 1H), 7.85 (d,  $J$  = 8.0 Hz, 1H), 7.61–7.57 (m, 1H), 7.54–7.51 (m, 1H), 7.26 (s, 1H), 7.19–7.12 (m, 4H), 4.20 (s, 3H), 2.96 (t,  $J$  = 7.6 Hz, 2H), 2.64 (t,  $J$  = 7.6 Hz, 2H), 1.95–1.85 (m, 2H), 1.73–1.64 (m, 2H), 1.07 (t,  $J$  = 7.6 Hz, 3H), 0.97 (t,  $J$  = 7.2 Hz, 3H);  $^{13}\text{C}$  NMR ( $\text{CDCl}_3$ , 101 MHz)  $\delta_{\text{C}}$  151.8, 151.1, 146.1, 142.8, 138.3, 136.9, 133.5, 131.3, 130.1, 129.6, 129.1, 128.9, 127.4, 124.8, 122.5, 119.5, 116.2, 38.4, 38.0, 27.8, 24.3, 22.5, 14.1, 13.9; HRMS (ESI-TOF,  $m/z$ ): calcd for  $\text{C}_{26}\text{H}_{27}\text{N}_4\text{O}$  [ $\text{M} + \text{H}$ ] $^+$ , 411.2179; found, 411.2188.

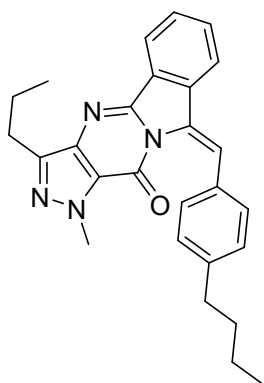

**(Z)-9-(4-butylbenzylidene)-1-methyl-3-propyl-1,9-dihydro-11H-pyrazolo[4',3':4,5]pyrimido[2,1-a]isoindol-11-one (6v)**

To a 10 mL Schlenk tube equipped with a magnetic stir bar was added 5-(2-bromophenyl)-1-methyl-3-propyl-1,6-dihydro-7H-pyrazolo[4,3-d]pyrimidin-7-one **4a** (174 mg, 0.5 mmol, 1.0 equiv), 1-butyl-4-ethynylbenzene **2s** (95 mg, 0.6 mmol, 1.2 equiv), DMF (4.0 mL),  $\text{Cs}_2\text{CO}_3$  (163 mg, 0.5 mmol, 1.0 equiv), *o*-phen (18 mg, 0.1 mmol, 0.2 equiv), CuI (10 mg, 0.05 mmol, 0.1 equiv). The reaction mixture was stirred at 80 °C in an oil bath for about 12 h. The resulting mixture was concentrated and the residue was taken up in ethyl acetate. The organic layer was washed with brine, dried over  $\text{Na}_2\text{SO}_4$  and concentrated. Purification of the crude product by column chromatography (silica gel; petroleum ether/ethyl acetate = 13:1) afforded **6v** in 64% yield (136 mg).

Yellow solid; mp 105–106 °C;  $^1\text{H}$  NMR ( $\text{CDCl}_3$ , 400 MHz):  $\delta_{\text{H}}$  8.13 (d,  $J$  = 7.6 Hz, 1H), 7.86–7.83 (m, 1H), 7.60–7.50 (m, 2H), 7.25 (s, 1H), 7.19–7.12 (m, 4H), 4.20 (s, 3H), 2.96 (t,  $J$  = 7.6 Hz, 2H), 2.67 (t,  $J$  = 7.6 Hz, 2H), 1.95–1.85 (m, 2H), 1.68–1.60 (m, 2H), 1.43–1.34 (m, 2H), 1.07 (t,

$J = 7.6$  Hz, 3H), 0.94 (t,  $J = 7.6$  Hz, 3H);  $^{13}\text{C}$  NMR ( $\text{CDCl}_3$ , 101 MHz)  $\delta_{\text{C}}$  151.8, 151.1, 146.1, 143.0, 138.3, 136.9, 133.5, 131.3, 130.1, 129.6, 129.1, 128.9, 127.3, 124.8, 122.5, 119.5, 116.2, 38.3, 35.6, 33.3, 27.8, 22.5, 22.4, 14.1, 14.0; HRMS (ESI-TOF,  $m/z$ ): calcd for  $\text{C}_{27}\text{H}_{29}\text{N}_4\text{O}$   $[\text{M} + \text{H}]^+$ , 425.2336; found, 425.2352.

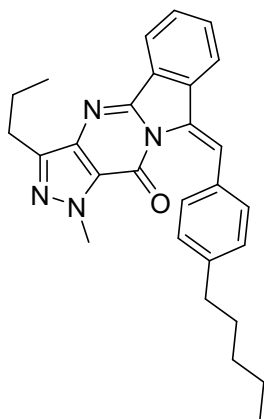

**(Z)-1-methyl-9-(4-pentylbenzylidene)-3-propyl-1,9-dihydro-11H-pyrazolo[4',3':4,5]pyrimido[2,1-a]isoindol-11-one (6w)**

To a 10 mL Schlenk tube equipped with a magnetic stir bar was added 5-(2-bromophenyl)-1-methyl-3-propyl-1,6-dihydro-7H-pyrazolo[4,3-d]pyrimidin-7-one **4a** (174 mg, 0.5 mmol, 1.0 equiv), 1-ethynyl-4-pentylbenzene **2t** (103 mg, 0.6 mmol, 1.2 equiv), DMF (4.0 mL),  $\text{Cs}_2\text{CO}_3$  (163 mg, 0.5 mmol, 1.0 equiv), *o*-phen (18 mg, 0.1 mmol, 0.2 equiv), CuI (10 mg, 0.05 mmol, 0.1 equiv). The reaction mixture was stirred at 80 °C in an oil bath for about 12 h. The resulting mixture was concentrated and the residue was taken up in ethyl acetate. The organic layer was washed with brine, dried over  $\text{Na}_2\text{SO}_4$  and concentrated. Purification of the crude product by column chromatography (silica gel; petroleum ether/ethyl acetate = 13:1) afforded **6w** in 62% yield (136 mg).

Yellow solid; mp 88–89 °C; **6w** : **5w** = 98 : 2;  $^1\text{H}$  NMR ( $\text{CDCl}_3$ , 400 MHz, Major Product **6w**):  $\delta_{\text{H}}$  8.13 (d,  $J = 7.6$  Hz, 1H), 7.85 (d,  $J = 8.0$  Hz, 1H), 7.61–7.51 (m, 2H), 7.26 (s, 1H), 7.19–7.12 (m, 4H), 4.20 (s, 3H), 2.96 (t,  $J = 7.6$  Hz, 2H), 2.66 (t,  $J = 8.0$  Hz, 2H), 1.95–1.85 (m, 2H), 1.70–1.62 (m, 2H), 1.37–1.33 (m, 4H), 1.07 (t,  $J = 8.0$  Hz, 3H), 0.93–0.87 (m, 3H);  $^{13}\text{C}$  NMR ( $\text{CDCl}_3$ , 101 MHz)  $\delta_{\text{C}}$  151.8, 151.1, 146.1, 143.0, 138.3, 136.9, 133.5, 131.3, 130.1, 129.6, 129.2, 128.9, 127.3, 124.8, 122.5, 119.5, 116.2, 38.3, 35.9, 31.5, 30.8, 27.8, 22.53, 22.50, 14.1, 14.0; HRMS (ESI-TOF,  $m/z$ ): calcd for  $\text{C}_{28}\text{H}_{31}\text{N}_4\text{O}$   $[\text{M} + \text{H}]^+$ , 439.2492; found, 439.2513.

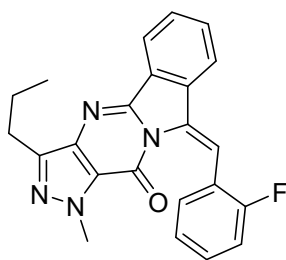

**(Z)-9-(2-fluorobenzylidene)-1-methyl-3-propyl-1,9-dihydro-11H-pyrazolo[4',3':4,5]pyrimido[2,1-a]isoindol-11-one (6x)**

To a 10 mL Schlenk tube equipped with a magnetic stir bar was added 5-(2-bromophenyl)-1-methyl-3-propyl-1,6-dihydro-7H-pyrazolo[4,3-d]pyrimidin-7-one **4a** (174 mg, 0.5 mmol, 1.0 equiv), 1-ethynyl-2-fluorobenzene **2b** (72 mg, 0.6 mmol, 1.2 equiv), DMF (4.0 mL), Cs<sub>2</sub>CO<sub>3</sub> (163 mg, 0.5 mmol, 1.0 equiv), *o*-phen (18 mg, 0.1 mmol, 0.2 equiv), CuI (10 mg, 0.05 mmol, 0.1 equiv). The reaction mixture was stirred at 80 °C in an oil bath for about 12 h. The resulting mixture was concentrated and the residue was taken up in ethyl acetate. The organic layer was washed with brine, dried over Na<sub>2</sub>SO<sub>4</sub> and concentrated. Purification of the crude product by column chromatography (silica gel; petroleum ether/ethyl acetate = 13:1) afforded **6x** in 57% yield (110 mg).

Yellow solid; mp 186–189 °C; <sup>1</sup>H NMR (CDCl<sub>3</sub>, 400 MHz): δ<sub>H</sub> 8.13 (d, *J* = 7.2 Hz, 1H), 7.87 (d, *J* = 7.6 Hz, 1H), 7.61–7.53 (m, 2H), 7.38–7.28 (m, 2H), 7.20–7.15 (m, 2H), 7.08–7.03 (m, 1H), 4.17 (s, 3H), 2.95 (t, *J* = 7.6 Hz, 2H), 1.94–1.85 (m, 2H), 1.06 (t, *J* = 7.2 Hz, 3H); <sup>13</sup>C NMR (CDCl<sub>3</sub>, 101 MHz) δ<sub>C</sub> 160.0 (d, *J*<sub>C-F</sub> = 248.2 Hz), 151.3, 151.2, 146.2, 137.6, 137.0, 132.7 (d, *J*<sub>C-F</sub> = 1.8 Hz), 131.3, 130.6 (d, *J*<sub>C-F</sub> = 3.3 Hz), 129.9 (d, *J*<sub>C-F</sub> = 8.6 Hz), 129.5, 129.4, 125.1, 124.9 (d, *J*<sub>C-F</sub> = 7.0 Hz), 122.9 (d, *J*<sub>C-F</sub> = 3.2 Hz), 122.5, 119.8, 114.6 (d, *J*<sub>C-F</sub> = 22.0 Hz), 108.4, 38.4, 27.7, 22.5, 14.1; HRMS (ESI-TOF, *m/z*): calcd for C<sub>23</sub>H<sub>20</sub>FN<sub>4</sub>O [M + H]<sup>+</sup>, 387.1616; found, 387.1616.

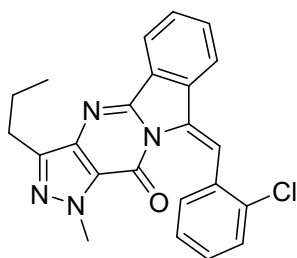

**(Z)-9-(2-chlorobenzylidene)-1-methyl-3-propyl-1,9-dihydro-11H-pyrazolo[4',3':4,5]pyrimido[2,1- $\alpha$ ]isoindol-11-one (6y)**

To a 10 mL Schlenk tube equipped with a magnetic stir bar was added 5-(2-bromophenyl)-1-methyl-3-propyl-1,6-dihydro-7H-pyrazolo[4,3-*d*]pyrimidin-7-one **4a** (174 mg, 0.5 mmol, 1.0 equiv), 1-chloro-2-ethynylbenzene **2c** (82 mg, 0.6 mmol, 1.2 equiv), DMF (4.0 mL), Cs<sub>2</sub>CO<sub>3</sub> (163 mg, 0.5 mmol, 1.0 equiv), *o*-phen (18 mg, 0.1 mmol, 0.2 equiv), CuI (10 mg, 0.05 mmol, 0.1 equiv). The reaction mixture was stirred at 80 °C in an oil bath for about 12 h. The resulting mixture was concentrated and the residue was taken up in ethyl acetate. The organic layer was washed with brine, dried over Na<sub>2</sub>SO<sub>4</sub> and concentrated. Purification of the crude product by column chromatography (silica gel; petroleum ether/ethyl acetate = 13:1) afforded **6y** in 52% yield (105 mg).

Yellow solid; mp 154–157 °C; <sup>1</sup>H NMR (CDCl<sub>3</sub>, 400 MHz):  $\delta_{\text{H}}$  8.13 (d, *J* = 7.2 Hz, 1H), 7.91 (d, *J* = 7.6 Hz, 1H), 7.64–7.55 (m, 2H), 7.46 (d, *J* = 8.0 Hz, 1H), 7.30–7.19 (m, 3H), 7.10 (d, *J* = 7.6 Hz, 1H), 4.13 (s, 3H), 2.94 (t, *J* = 7.6 Hz, 2H), 1.93–1.84 (m, 2H), 1.06 (t, *J* = 7.2 Hz, 3H); <sup>13</sup>C NMR (CDCl<sub>3</sub>, 101 MHz)  $\delta_{\text{C}}$  151.5, 151.0, 146.2, 137.5, 136.9, 135.4, 133.5, 132.3, 131.4, 131.3, 129.6, 129.5, 128.9, 128.6, 125.2, 124.8, 122.5, 120.0, 112.1, 38.4, 27.7, 22.5, 14.1; HRMS (ESI-TOF, *m/z*): calcd for C<sub>23</sub>H<sub>20</sub>ClN<sub>4</sub>O [M + H]<sup>+</sup>, 403.1320; found, 403.1325.

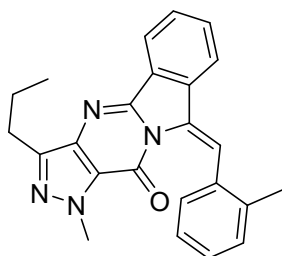

**(Z)-1-methyl-9-(2-methylbenzylidene)-3-propyl-1,9-dihydro-11H-pyrazolo[4',3':4,5]pyrimido[2,1- $\alpha$ ]isoindol-11-one (6z)**

To a 10 mL Schlenk tube equipped with a magnetic stir bar was added 5-(2-bromophenyl)-1-methyl-3-propyl-1,6-dihydro-7H-pyrazolo[4,3-*d*]pyrimidin-7-one **4a** (174 mg, 0.5 mmol, 1.0 equiv), 1-ethynyl-2-methylbenzene **2d** (70 mg, 0.6 mmol, 1.2 equiv), DMF (4.0 mL), Cs<sub>2</sub>CO<sub>3</sub> (163 mg, 0.5 mmol, 1.0 equiv), *o*-phen (18 mg, 0.1 mmol, 0.2 equiv), CuI (10 mg, 0.05 mmol, 0.1 equiv). The reaction mixture was stirred at 80 °C in an oil bath for about 12 h. The resulting mixture was concentrated and the residue was taken up in ethyl acetate. The organic layer was washed with brine, dried over



Na<sub>2</sub>SO<sub>4</sub> and concentrated. Purification of the crude product by column chromatography (silica gel; petroleum ether/ethyl acetate = 13:1) afforded **6z** in 54% yield (103 mg).

Yellow solid; mp 134–135 °C; **6z** : **5z** = 97 : 3; <sup>1</sup>H NMR (CDCl<sub>3</sub>, 400 MHz, Major Product **6z**): δ<sub>H</sub> 8.13 (d, *J* = 7.2 Hz, 1H), 7.87 (d, *J* = 8.0 Hz, 1H), 7.62–7.52 (m, 2H), 7.29–7.22 (m, 3H), 7.11 (t, *J* = 7.2 Hz, 1H), 6.96 (d, *J* = 7.6 Hz, 1H), 4.12 (s, 3H), 2.94 (t, *J* = 7.6 Hz, 2H), 2.42 (s, 3H), 1.94–1.84 (m, 2H), 1.06 (t, *J* = 7.6 Hz, 3H); <sup>13</sup>C NMR (CDCl<sub>3</sub>, 101 MHz) δ<sub>C</sub> 151.7, 150.9, 146.1, 137.8, 136.9, 136.0, 135.9, 131.3, 129.9, 129.4, 129.3, 129.2, 128.0, 124.9, 124.4, 122.5, 119.7, 114.7, 38.3, 27.7, 22.5, 20.4, 14.1; HRMS (ESI-TOF, *m/z*): calcd for C<sub>24</sub>H<sub>23</sub>N<sub>4</sub>O [M + H]<sup>+</sup>, 383.1866; found, 383.1875.

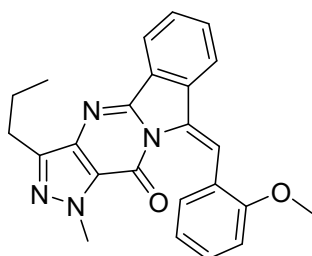

**(Z)-9-(2-methoxybenzylidene)-1-methyl-3-propyl-1,9-dihydro-11H-pyrazolo[4',3':4,5]pyrimido[2,1-a]isoindol-11-one (6aa)**

To a 10 mL Schlenk tube equipped with a magnetic stir bar was added 5-(2-bromophenyl)-1-methyl-3-propyl-1,6-dihydro-7H-pyrazolo[4,3-*d*]pyrimidin-7-one **4a** (174 mg, 0.5 mmol, 1.0 equiv), 1-ethynyl-2-methoxybenzene **2e** (79 mg, 0.6 mmol, 1.2 equiv), DMF (4.0 mL), Cs<sub>2</sub>CO<sub>3</sub> (163 mg, 0.5 mmol, 1.0 equiv), *o*-phen (18 mg, 0.1 mmol, 0.2 equiv), CuI (10 mg, 0.05 mmol, 0.1 equiv). The reaction mixture was stirred at 80 °C in an oil bath for about 12 h. The resulting mixture was concentrated and the residue was taken up in ethyl acetate. The organic layer was washed with brine, dried over Na<sub>2</sub>SO<sub>4</sub> and concentrated. Purification of the crude product by column chromatography (silica gel; petroleum ether/ethyl acetate = 13:1) afforded **6aa** in 59% yield (118 mg).

Yellow solid; mp 178–182 °C; <sup>1</sup>H NMR (CDCl<sub>3</sub>, 400 MHz): δ<sub>H</sub> 8.13 (d, *J* = 7.6 Hz, 1H), 7.88 (d, *J* = 7.6 Hz, 1H), 7.60–7.50 (m, 2H), 7.38–7.30 (m, 2H), 7.17 (d, *J* = 7.6 Hz, 1H), 7.00–6.96 (m, 1H), 6.91 (d, *J* = 8.0 Hz, 1H), 4.17 (s, 3H), 3.70 (s, 3H), 2.97 (t, *J* = 7.6 Hz, 2H), 1.95–1.86 (m, 2H), 1.06 (t, *J* = 7.6 Hz, 3H); <sup>13</sup>C NMR (CDCl<sub>3</sub>, 101 MHz) δ<sub>C</sub> 156.9, 151.5, 150.8, 146.1, 138.1, 136.9, 131.21, 131.18, 130.9, 129.7, 129.1, 128.9, 125.7, 124.9, 122.4, 119.7, 119.4, 111.6,

109.8, 55.0, 38.3, 27.8, 22.4, 14.1; HRMS (ESI-TOF,  $m/z$ ): calcd for  $C_{24}H_{23}N_4O_2$   $[M + H]^+$ , 399.1816; found, 399.1824.

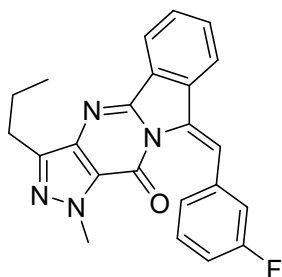

**(Z)-9-(3-fluorobenzylidene)-1-methyl-3-propyl-1,9-dihydro-11H-pyrazolo[4',3':4,5]pyrimido[2,1- $\alpha$ ]isoindol-11-one (6ab)**

To a 10 mL Schlenk tube equipped with a magnetic stir bar was added 5-(2-bromophenyl)-1-methyl-3-propyl-1,6-dihydro-7H-pyrazolo[4,3-*d*]pyrimidin-7-one **4a** (174 mg, 0.5 mmol, 1.0 equiv), 1-ethynyl-3-fluorobenzene **2f** (72 mg, 0.6 mmol, 1.2 equiv), DMF (4.0 mL),  $Cs_2CO_3$  (163 mg, 0.5 mmol, 1.0 equiv), *o*-phen (18 mg, 0.1 mmol, 0.2 equiv), CuI (10 mg, 0.05 mmol, 0.1 equiv). The reaction mixture was stirred at 80 °C in an oil bath for about 12 h. The resulting mixture was concentrated and the residue was taken up in ethyl acetate. The organic layer was washed with brine, dried over  $Na_2SO_4$  and concentrated. Purification of the crude product by column chromatography (silica gel; petroleum ether/ethyl acetate = 13:1) afforded **6ab** in 57% yield (110 mg).

Yellow solid; mp 186–187 °C; **6ab** : **5ab** = 97 : 3;  $^1H$  NMR ( $CDCl_3$ , 400 MHz, Major Product **6ab**):  $\delta_H$  8.13 (d,  $J = 7.6$  Hz, 1H), 7.85 (d,  $J = 7.6$  Hz, 1H), 7.63–7.54 (m, 2H) 7.35–7.29 (m, 1H), 7.20 (s, 1H), 7.06–7.00 (m, 2H), 6.90 (d,  $J = 9.6$  Hz, 1H), 4.19 (s, 3H), 2.95 (t,  $J = 7.6$  Hz, 2H), 1.94–1.85 (m, 2H), 1.06 (t,  $J = 7.6$  Hz, 3H);  $^{13}C$  NMR ( $CDCl_3$ , 101 MHz)  $\delta_C$  161.8 (d,  $J_{C-F} = 243.6$  Hz), 151.7, 151.2, 146.2, 138.4 (d,  $J_{C-F} = 8.2$  Hz), 137.8, 136.9, 131.4, 131.2, 129.5, 129.4, 128.5 (d,  $J_{C-F} = 8.4$  Hz), 125.6 (d,  $J_{C-F} = 2.9$  Hz), 124.7, 122.6, 119.7, 116.6 (d,  $J_{C-F} = 21.9$  Hz), 114.7 (d,  $J_{C-F} = 21.2$  Hz), 114.2 (d,  $J_{C-F} = 2.8$  Hz), 38.4, 27.7, 22.5, 14.0; HRMS (ESI-TOF,  $m/z$ ): calcd for  $C_{23}H_{20}FN_4O$   $[M + H]^+$ , 387.1616; found, 387.1616.

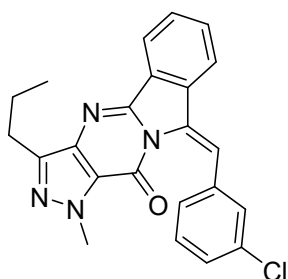

**(Z)-9-(3-chlorobenzylidene)-1-methyl-3-propyl-1,9-dihydro-11H-pyrazolo[4',3':4,5]pyrimido[2,1- $\alpha$ ]isoindol-11-one (6ac)**

To a 10 mL Schlenk tube equipped with a magnetic stir bar was added 5-(2-bromophenyl)-1-methyl-3-propyl-1,6-dihydro-7H-pyrazolo[4,3-*d*]pyrimidin-7-one **4a** (174 mg, 0.5 mmol, 1.0 equiv), 1-chloro-3-ethynylbenzene **2g** (82 mg, 0.6 mmol, 1.2 equiv), DMF (4.0 mL), Cs<sub>2</sub>CO<sub>3</sub> (163 mg, 0.5 mmol, 1.0 equiv), *o*-phen (18 mg, 0.1 mmol, 0.2 equiv), CuI (10 mg, 0.05 mmol, 0.1 equiv). The reaction mixture was stirred at 80 °C in an oil bath for about 12 h. The resulting mixture was concentrated and the residue was taken up in ethyl acetate. The organic layer was washed with brine, dried over Na<sub>2</sub>SO<sub>4</sub> and concentrated. Purification of the crude product by column chromatography (silica gel; petroleum ether/ethyl acetate = 13:1) afforded **6ac** in 49% yield (99 mg).

Yellow solid; mp 181–183 °C; <sup>1</sup>H NMR (CDCl<sub>3</sub>, 400 MHz):  $\delta_{\text{H}}$  8.14 (d, *J* = 7.6 Hz, 1H), 7.85 (d, *J* = 7.6 Hz, 1H), 7.63–7.54 (m, 2H), 7.30–7.29 (m, 2H), 7.17–7.10 (m, 3H), 4.20 (s, 3H), 2.96 (t, *J* = 7.6 Hz, 2H), 1.94–1.85 (m, 2H), 1.07 (t, *J* = 8.0 Hz, 3H); <sup>13</sup>C NMR (CDCl<sub>3</sub>, 101 MHz)  $\delta_{\text{C}}$  151.6, 151.2, 146.2, 137.9, 137.7, 136.9, 133.1, 131.4, 131.2, 129.9, 129.6, 129.4, 128.3, 128.0, 127.8, 124.7, 122.6, 119.7, 113.9, 38.4, 27.7, 22.5, 14.1; HRMS (ESI-TOF, *m/z*): calcd for C<sub>23</sub>H<sub>20</sub>ClN<sub>4</sub>O [M + H]<sup>+</sup>, 403.1320; found, 403.1325.

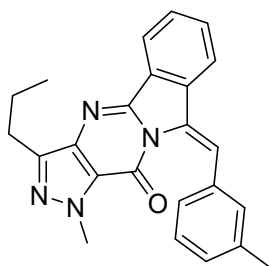

**(Z)-1-methyl-9-(3-methylbenzylidene)-3-propyl-1,9-dihydro-11H-pyrazolo[4',3':4,5]pyrimido[2,1- $\alpha$ ]isoindol-11-one (6ad)**

To a 10 mL Schlenk tube equipped with a magnetic stir bar was added 5-(2-bromophenyl)-1-methyl-3-propyl-1,6-dihydro-7H-pyrazolo[4,3-*d*]pyrimidin-7-one **4a** (174 mg, 0.5 mmol, 1.0 equiv), 1-ethynyl-3-methylbenzene **2h** (70 mg, 0.6 mmol, 1.2 equiv), DMF (4.0 mL), Cs<sub>2</sub>CO<sub>3</sub> (163 mg, 0.5 mmol, 1.0 equiv), *o*-phen (18 mg, 0.1 mmol, 0.2 equiv), CuI (10 mg, 0.05 mmol, 0.1 equiv). The reaction mixture was stirred at 80 °C in an oil bath for about 12 h. The resulting mixture was concentrated and the residue was taken up in ethyl acetate. The organic layer was washed with brine, dried over

Na<sub>2</sub>SO<sub>4</sub> and concentrated. Purification of the crude product by column chromatography (silica gel; petroleum ether/ethyl acetate = 13:1) afforded **6ad** in 56% yield (107 mg).

Yellow solid; mp 157–158 °C; **6ad** : **5ad** = 97 : 3; <sup>1</sup>H NMR (CDCl<sub>3</sub>, 400 MHz, Major Product **6ad**): δ<sub>H</sub> 8.13 (d, *J* = 7.6 Hz, 1H), 7.85 (d, *J* = 8.0 Hz, 1H), 7.61–7.51 (m, 2H), 7.27–7.23 (m, 2H), 7.15 (d, *J* = 7.6 Hz, 1H), 7.06 (s, 1H), 7.00 (d, *J* = 7.6 Hz, 1H), 4.19 (s, 3H), 2.96 (t, *J* = 6.8 Hz, 2H), 2.37 (s, 3H), 1.95–1.85 (m, 2H), 1.09–1.05 (m, 3H); <sup>13</sup>C NMR (CDCl<sub>3</sub>, 101 MHz) δ<sub>C</sub> 151.8, 151.1, 146.1, 138.2, 136.9, 136.6, 136.0, 131.3, 130.8, 130.1, 129.2, 129.1, 128.8, 127.4, 127.0, 124.8, 122.5, 119.5, 116.0, 38.3, 27.8, 22.5, 21.4, 14.1; HRMS (ESI-TOF, *m/z*): calcd for C<sub>24</sub>H<sub>23</sub>N<sub>4</sub>O [M + H]<sup>+</sup>, 383.1866; found, 383.1875.

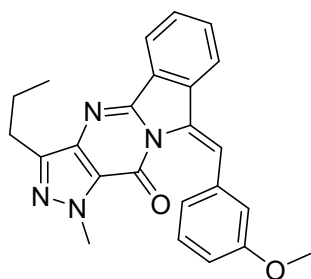

**(Z)-9-(3-methoxybenzylidene)-1-methyl-3-propyl-1,9-dihydro-11H-pyrazolo[4',3':4,5]pyrimido[2,1-a]isoindol-11-one (6ae)**

To a 10 mL Schlenk tube equipped with a magnetic stir bar was added 5-(2-bromophenyl)-1-methyl-3-propyl-1,6-dihydro-7H-pyrazolo[4,3-*d*]pyrimidin-7-one **4a** (174 mg, 0.5 mmol, 1.0 equiv), 1-ethynyl-3-methoxybenzene **2i** (79 mg, 0.6 mmol, 1.2 equiv), DMF (4.0 mL), Cs<sub>2</sub>CO<sub>3</sub> (163 mg, 0.5 mmol, 1.0 equiv), *o*-phen (18 mg, 0.1 mmol, 0.2 equiv), CuI (10 mg, 0.05 mmol, 0.1 equiv). The reaction mixture was stirred at 80 °C in an oil bath for about 12 h. The resulting mixture was concentrated and the residue was taken up in ethyl acetate. The organic layer was washed with brine, dried over Na<sub>2</sub>SO<sub>4</sub> and concentrated. Purification of the crude product by column chromatography (silica gel; petroleum ether/ethyl acetate = 13:1) afforded **6ae** in 55% yield (110 mg).

Yellow solid; mp 124–125 °C; **6ae** : **5ae** = 96 : 4; <sup>1</sup>H NMR (CDCl<sub>3</sub>, 400 MHz, Major Product **6ae**): δ<sub>H</sub> 8.13 (d, *J* = 7.6 Hz, 1H), 7.86 (d, *J* = 8.0 Hz, 1H), 7.62–7.52 (m, 2H), 7.30–7.24 (m, 2H), 6.89 (d, *J* = 8.4 Hz, 1H), 6.83 (d, *J* = 8.0 Hz, 1H), 6.78 (s, 1H), 4.19 (s, 3H), 3.80 (s, 3H), 2.96 (t, *J* = 7.6 Hz, 2H), 1.94–1.85 (m, 2H), 1.07 (t, *J* = 7.6 Hz, 3H); <sup>13</sup>C NMR (CDCl<sub>3</sub>, 101 MHz) δ<sub>C</sub> 158.5, 151.8, 151.1, 146.2, 138.1, 137.4, 136.9, 131.4, 130.5, 129.3, 129.2, 128.1, 124.8, 122.8,

122.6, 119.6, 115.7, 115.4, 113.8, 55.2, 38.4, 27.8, 22.5, 14.1; HRMS (ESI-TOF,  $m/z$ ): calcd for  $C_{24}H_{23}N_4O_2$   $[M + H]^+$ , 399.1816; found, 399.1824.

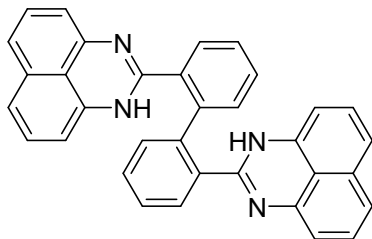

**2,2'-di(1H-perimidin-2-yl)-1,1'-biphenyl (3')**

White oil;  $^1H$  NMR ( $CDCl_3$ , 400 MHz):  $\delta_H$  13.94 (s, 2H), 9.19 (d,  $J = 4.4$  Hz, 1H), 8.26 (d,  $J = 8.0$  Hz, 1H), 7.80 (s, 1H), 7.67–7.63 (m, 3H), 7.31–7.25 (m, 3H), 7.18–7.02 (m, 11H);  $^{13}C$  NMR ( $CDCl_3$ , 101 MHz)  $\delta_C$  156.1, 150.3, 146.3, 140.0, 136.0, 135.6, 132.8, 129.6, 129.1, 128.7, 128.6, 127.9, 127.8, 126.6, 123.1, 122.4, 119.2; HRMS (ESI-TOF,  $m/z$ ): calcd for  $C_{34}H_{23}N_4$   $[M + H]^+$ , 487.1917; found, 487.1934.

## IV. NMR spectra

### 2-(2-bromo-5-fluorophenyl)-1H-perimidine (1d)

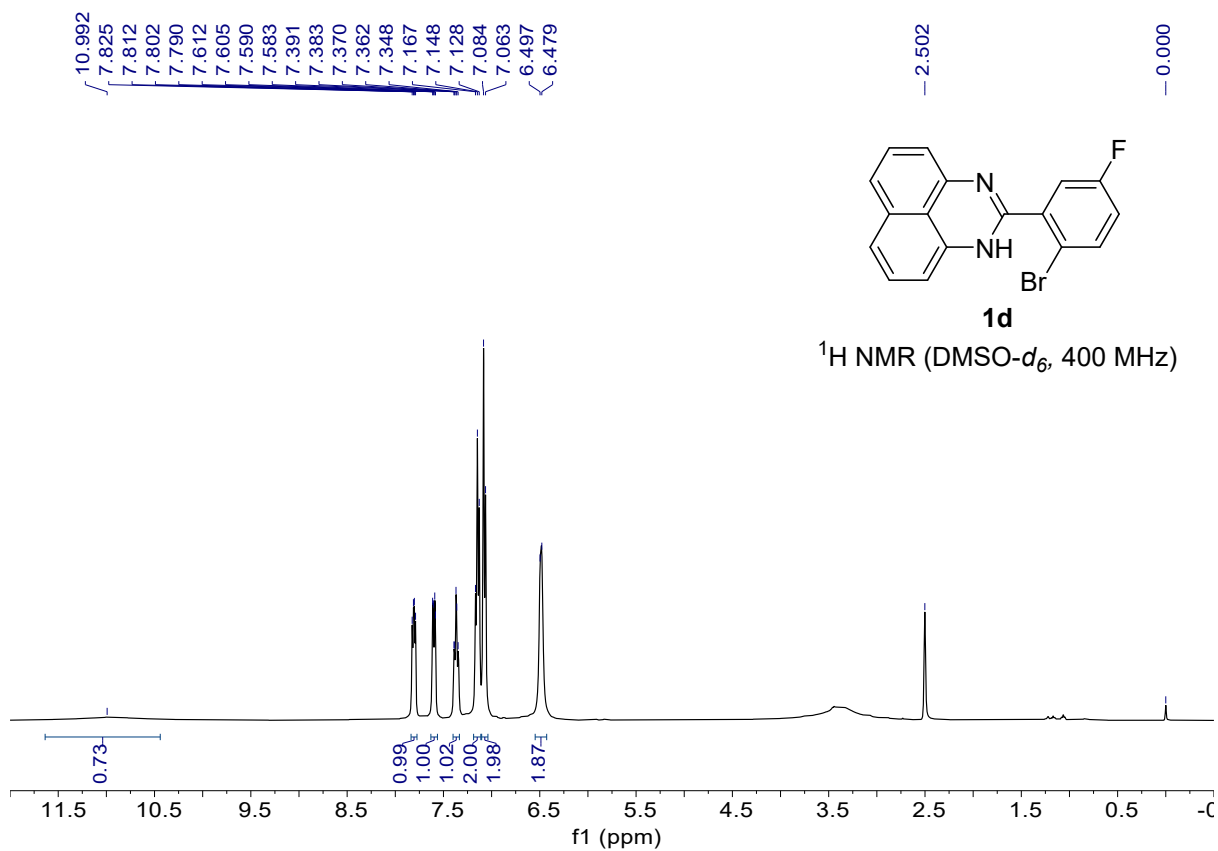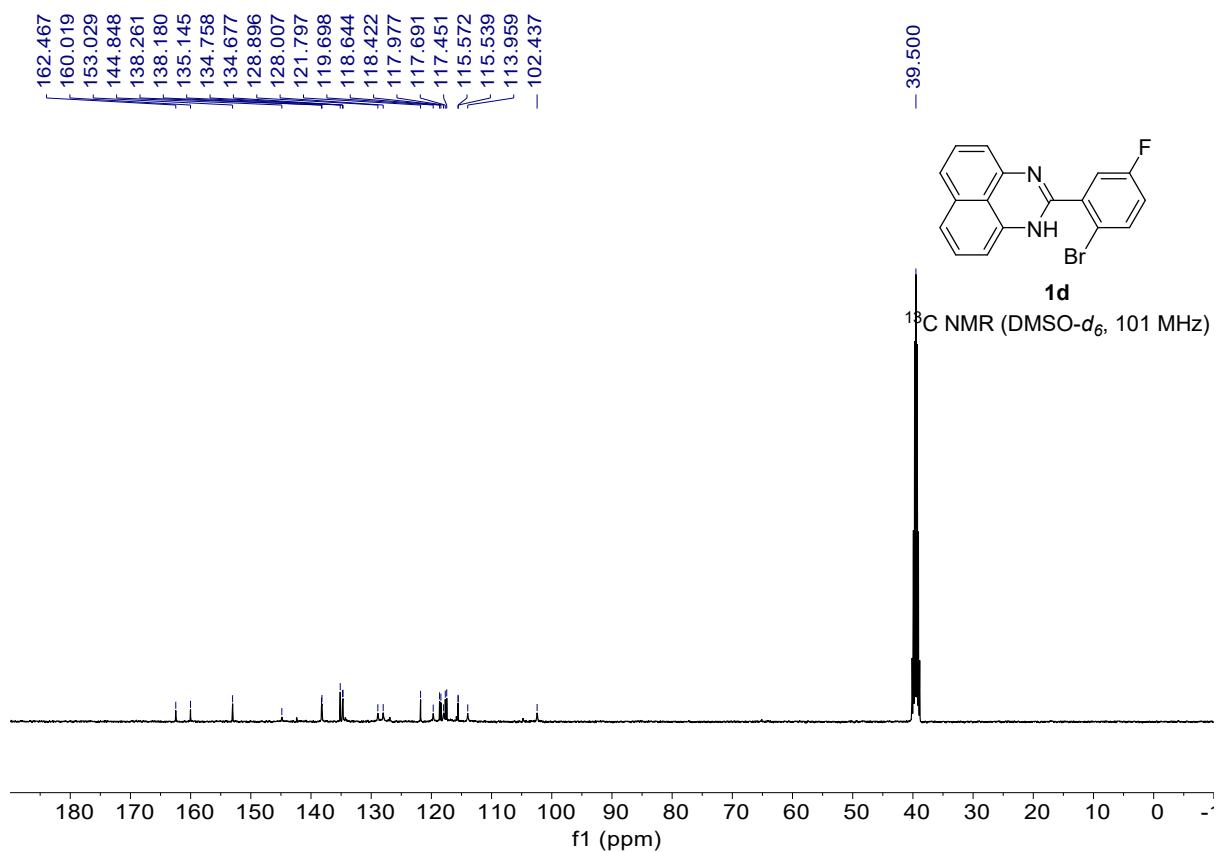

## 2-(2-bromo-6-fluorophenyl)-1H-perimidine (1g)

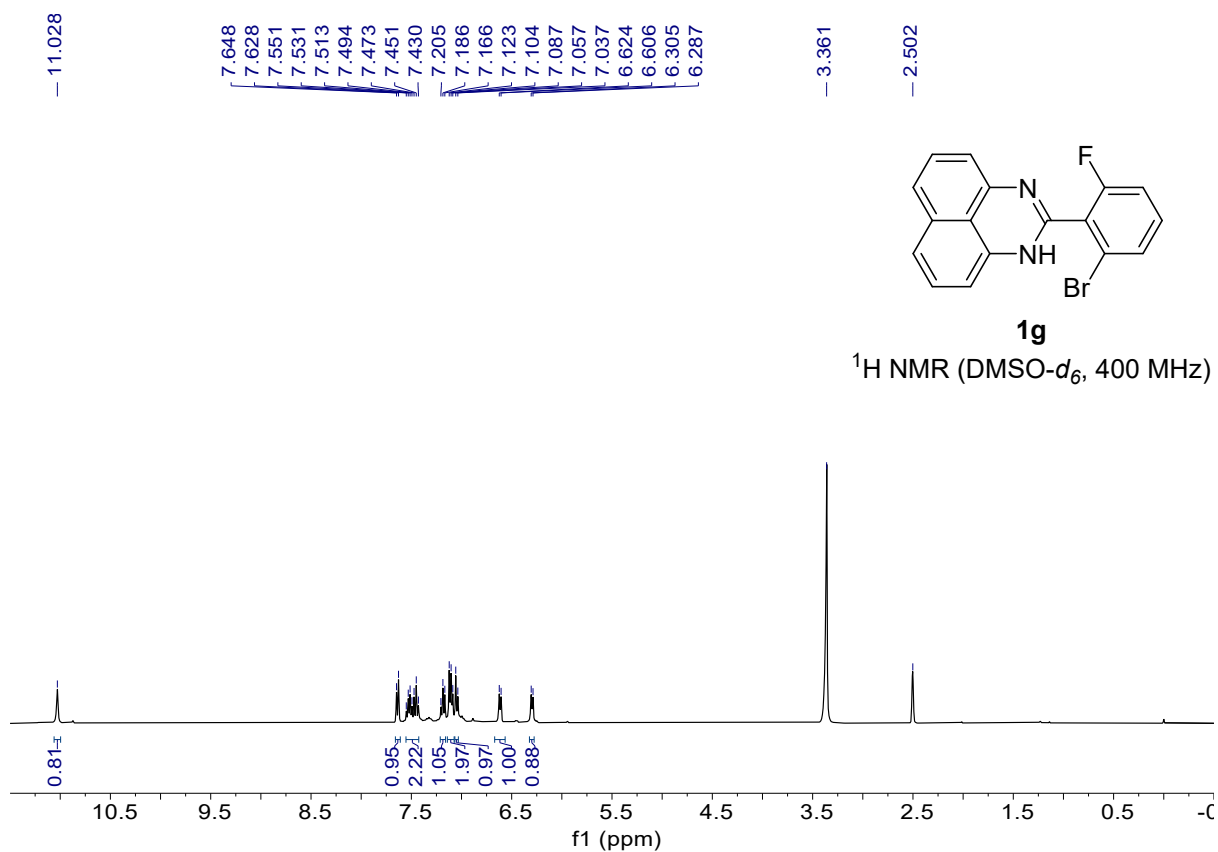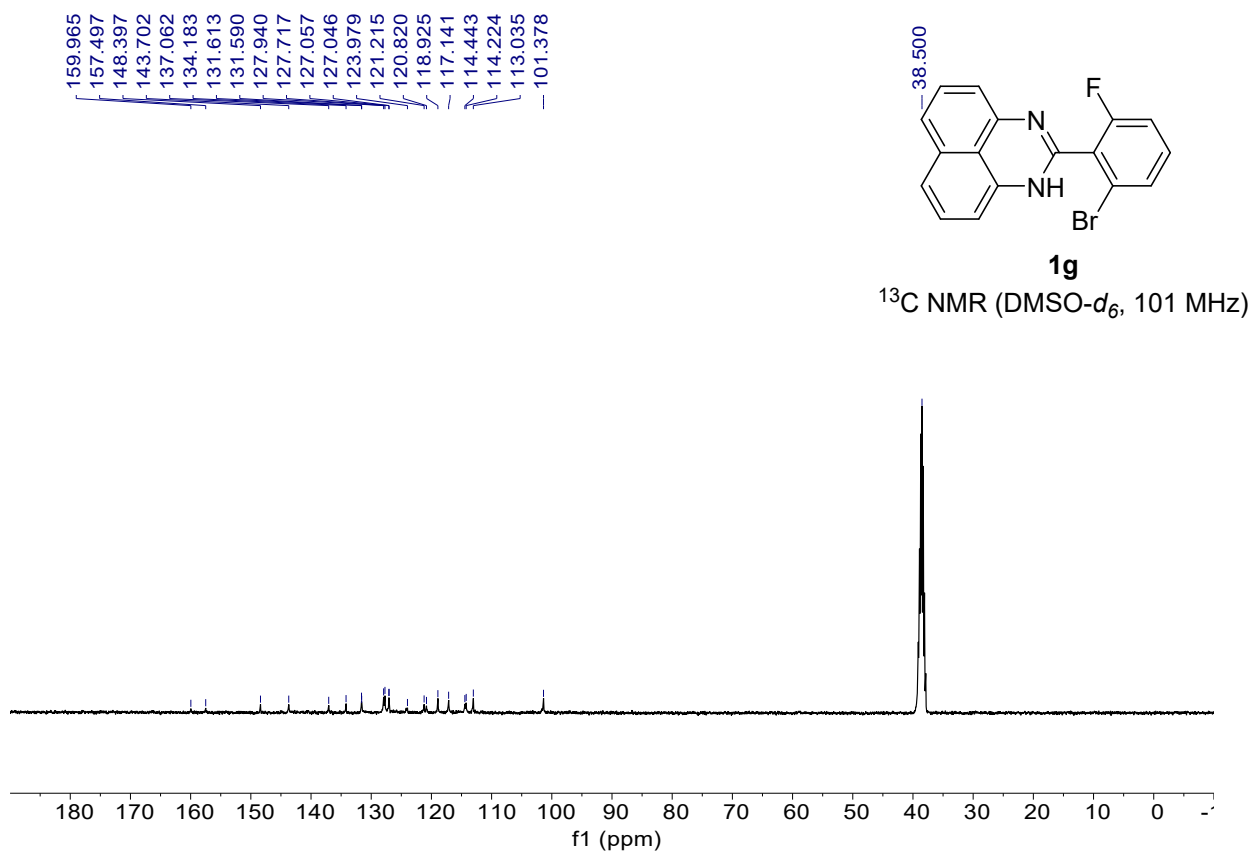

2-(6-bromobenzo[d][1,3]dioxol-5-yl)-1*H*-perimidine (1h)

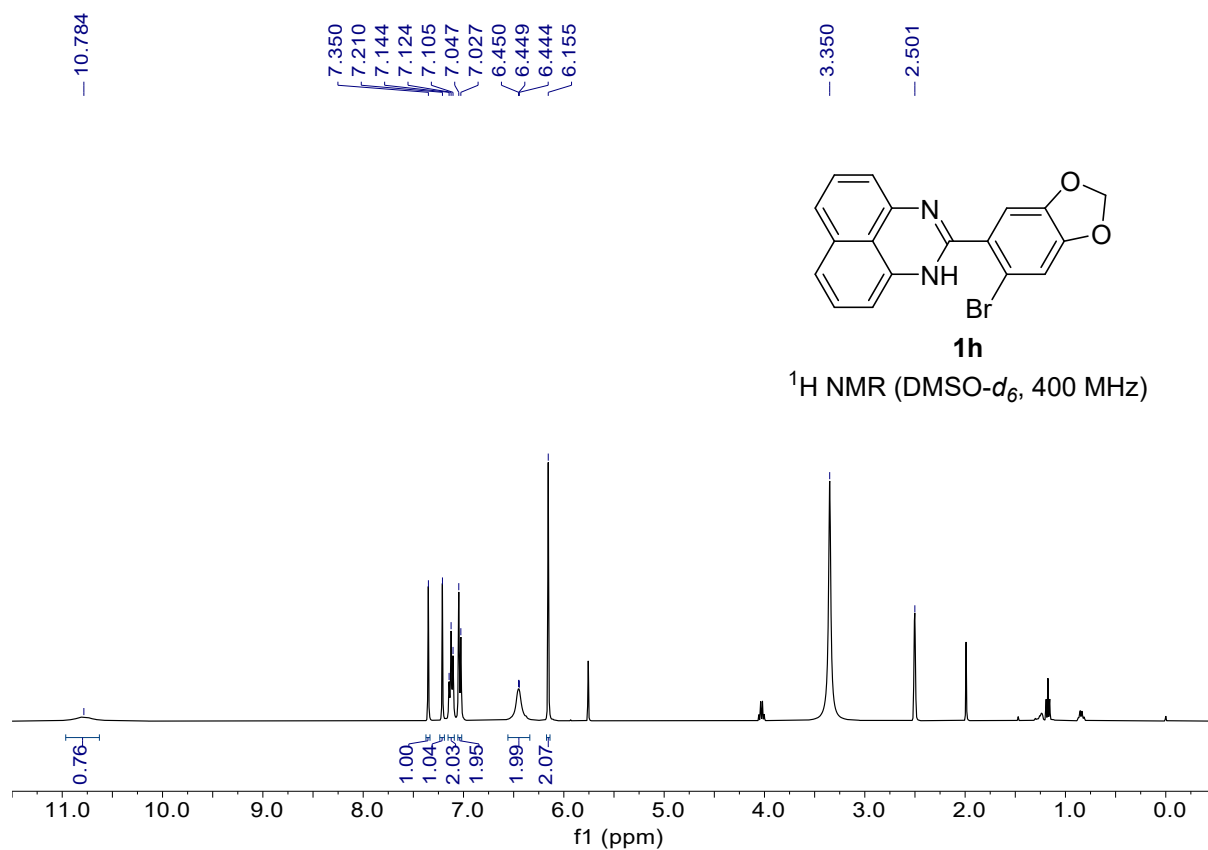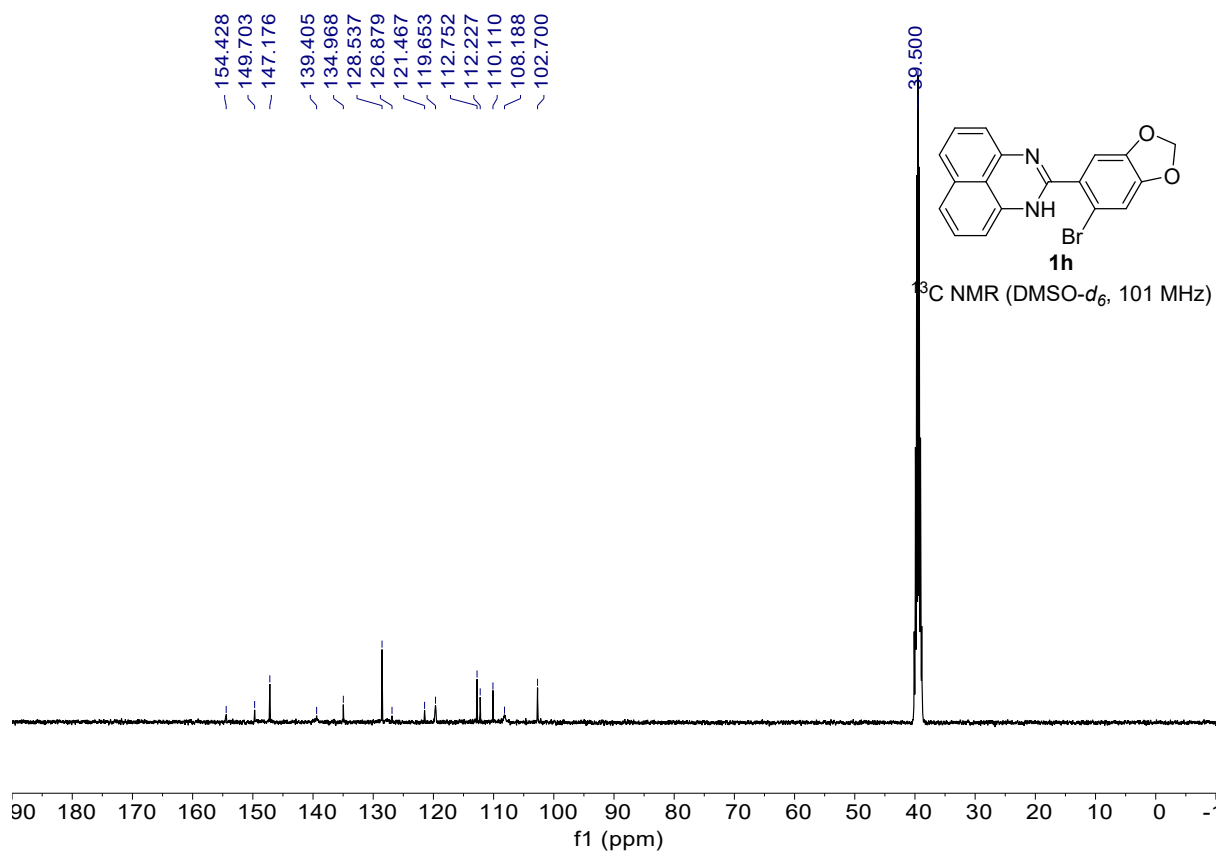



**2-(1-bromonaphthalen-2-yl)-1H-perimidine (1i)**

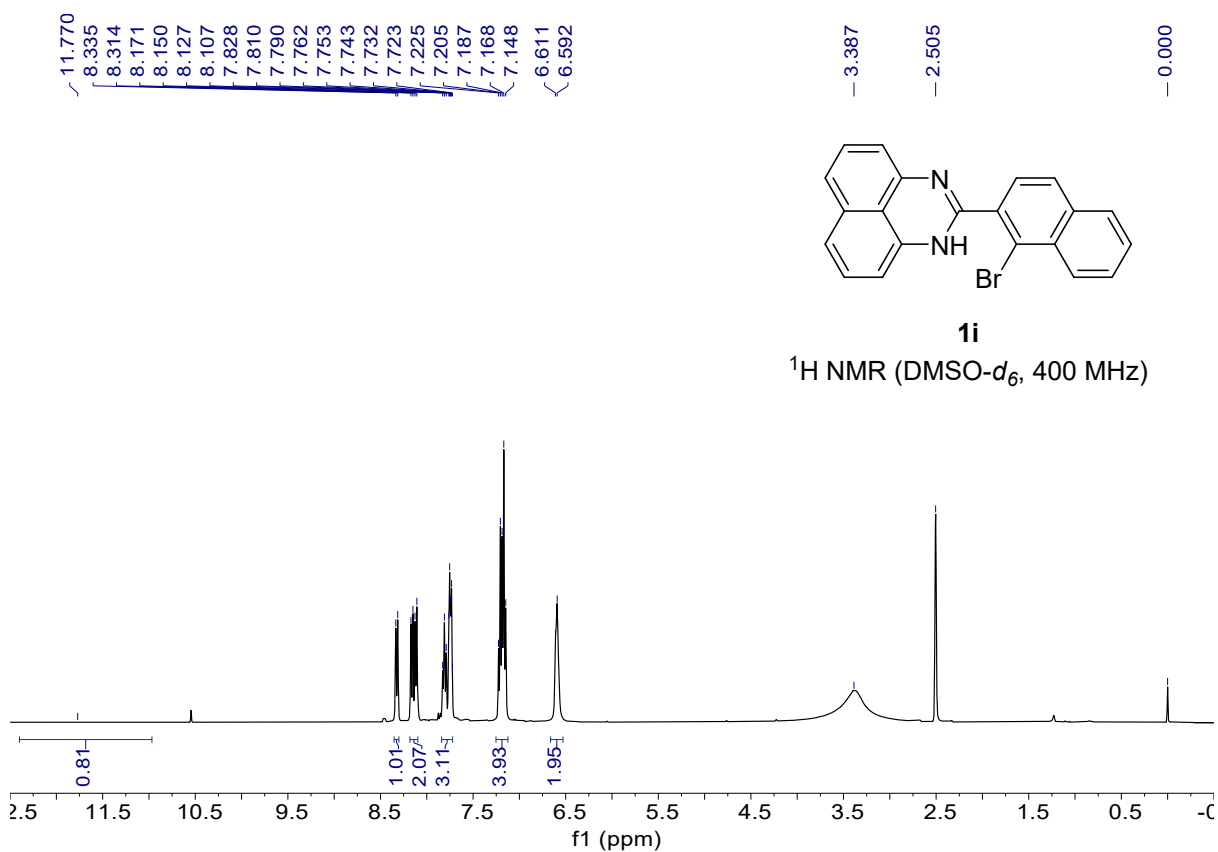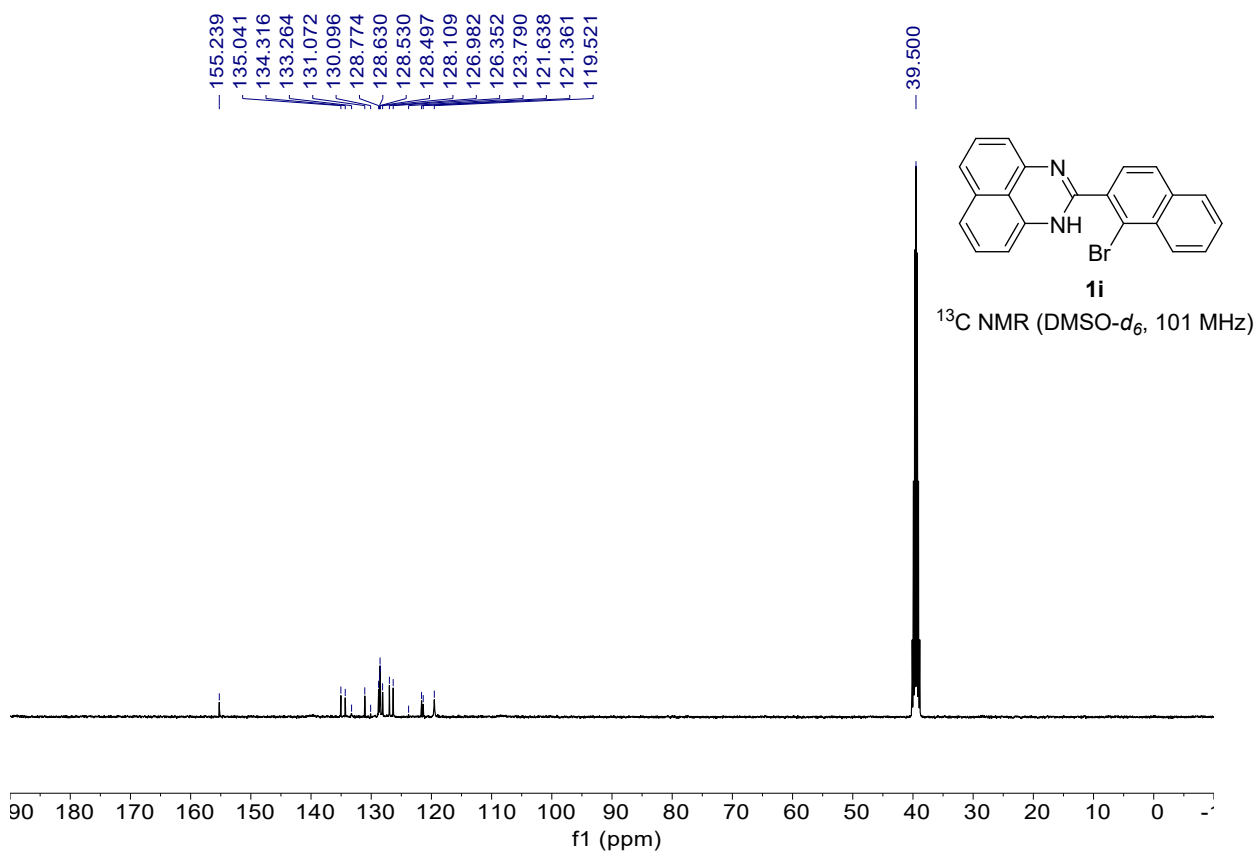

### 2-(2-bromopyridin-3-yl)-1H-perimidine (1j)

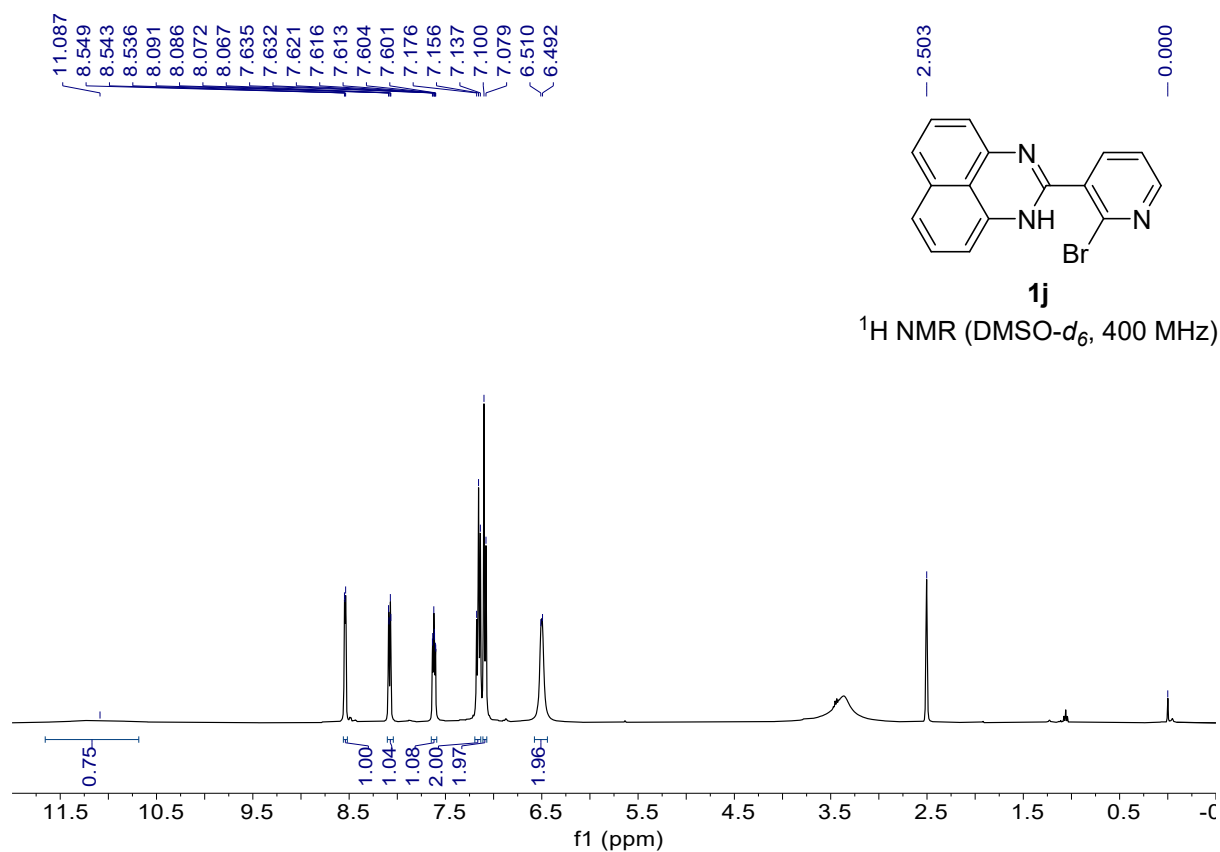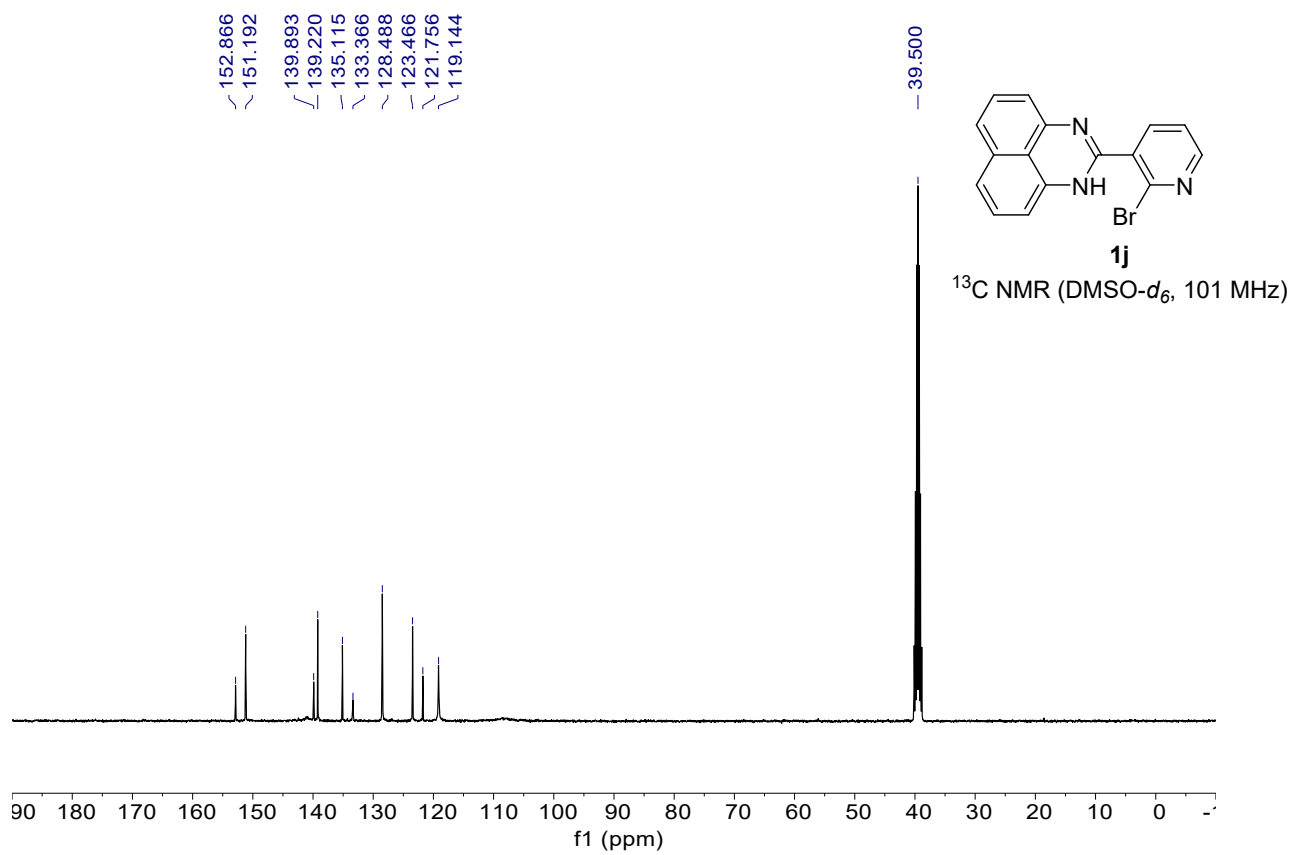

5-(2-bromo-4-fluorophenyl)-1-methyl-3-propyl-1,6-dihydro-7H-pyrazolo[4,3-d]pyrimidin-7-one

(4b)

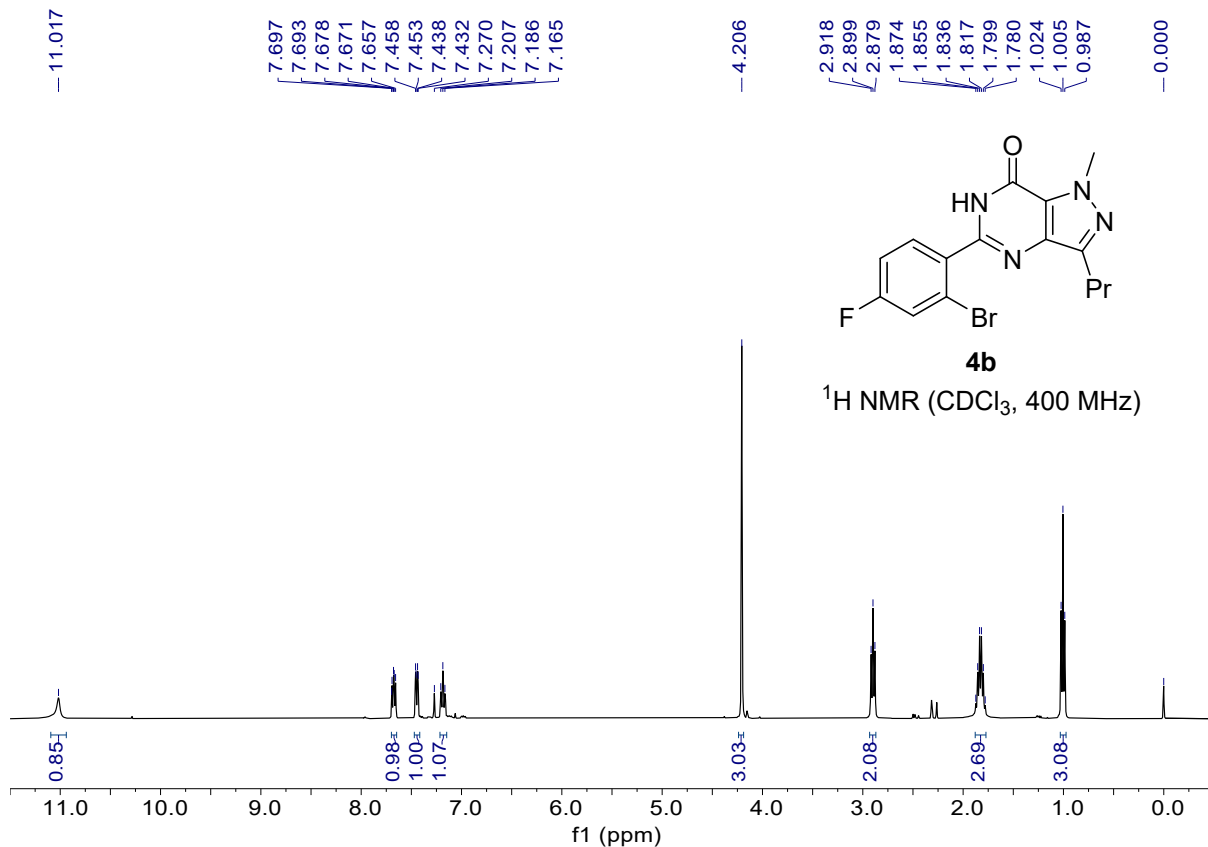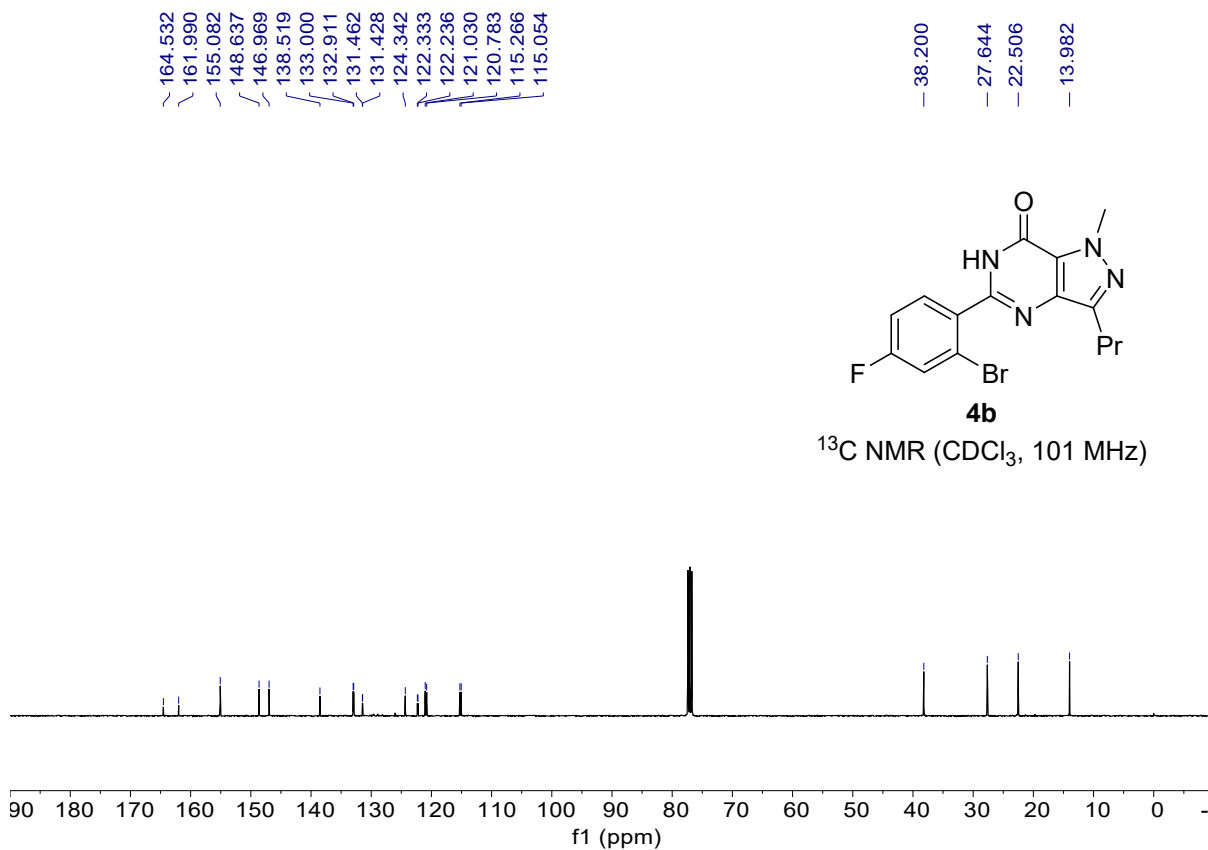

5-(2-bromo-4-chlorophenyl)-1-methyl-3-propyl-1,6-dihydro-7H-pyrazolo[4,3-d]pyrimidin-7-one (4c)

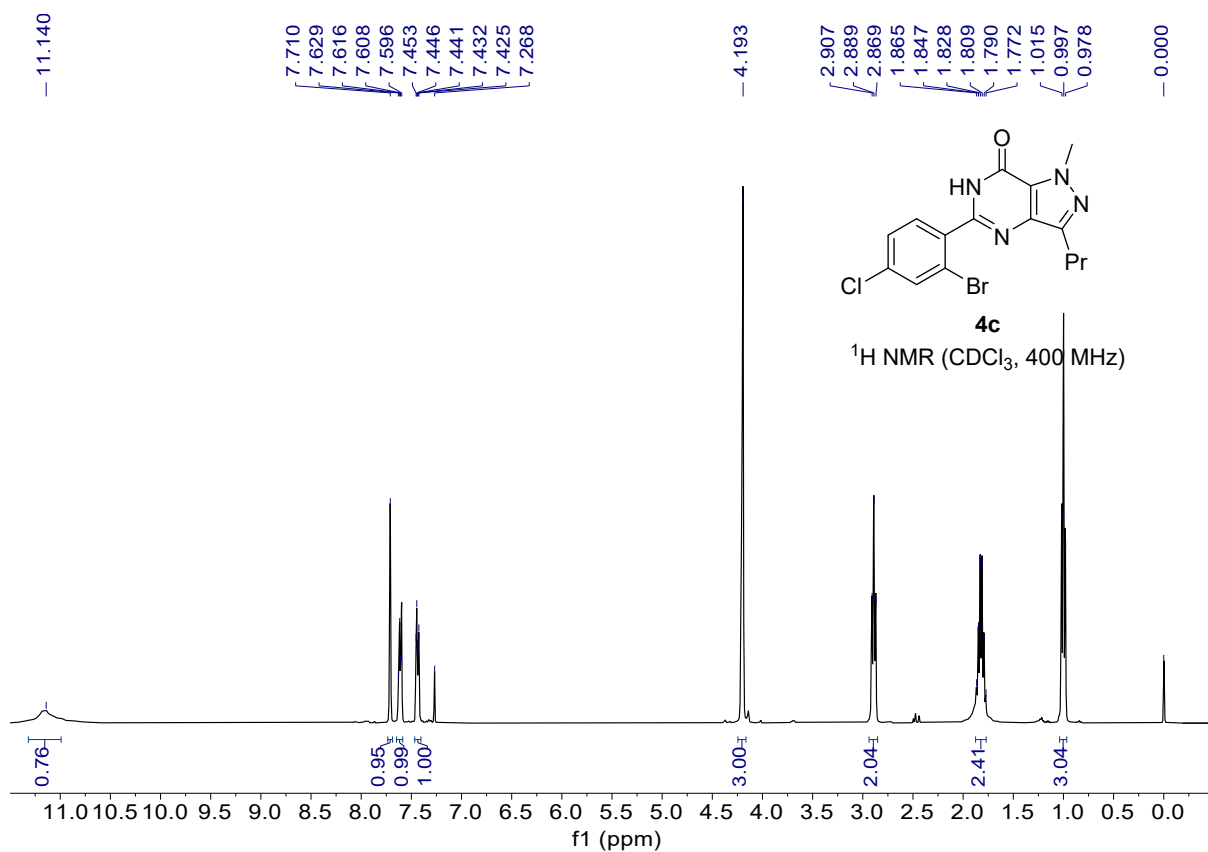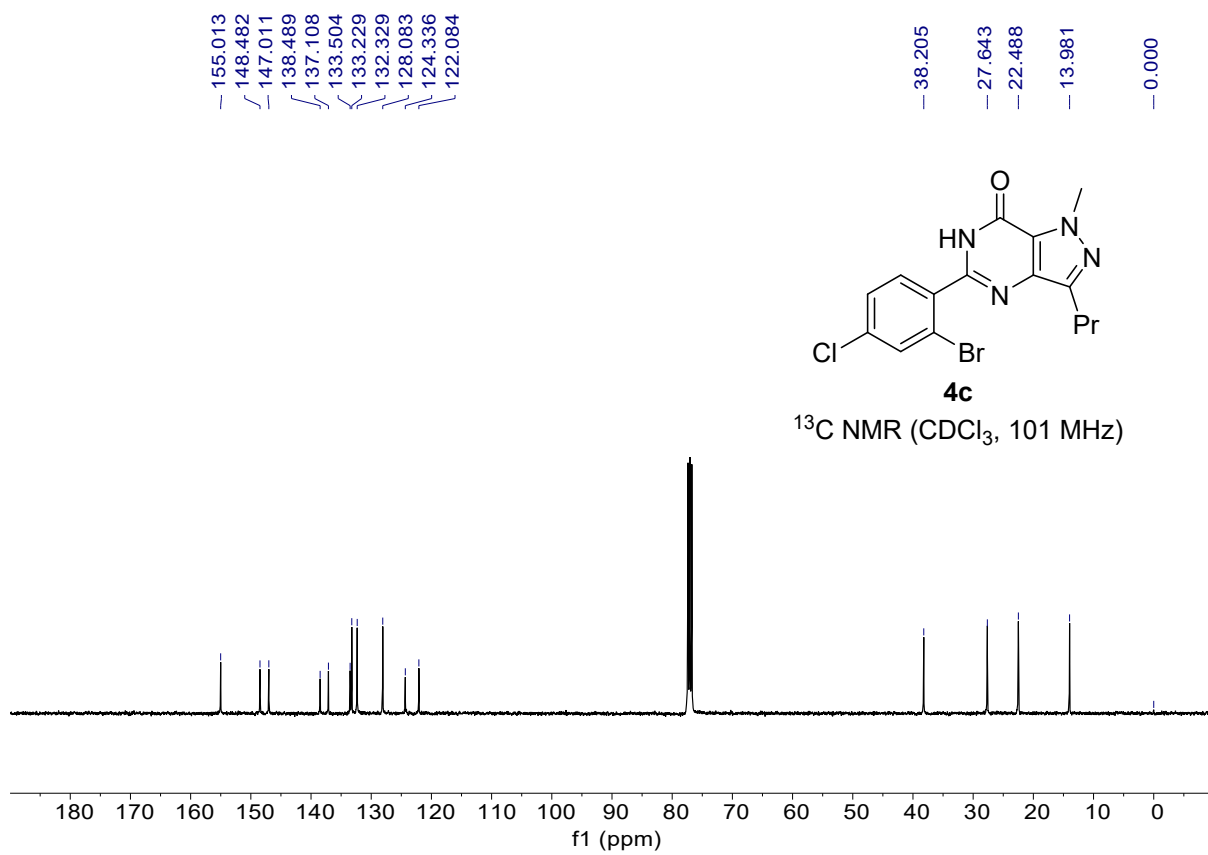

5-(2-bromo-4-methylphenyl)-1-methyl-3-propyl-1,6-dihydro-7H-pyrazolo[4,3-d]pyrimidin-7-one

(4d)

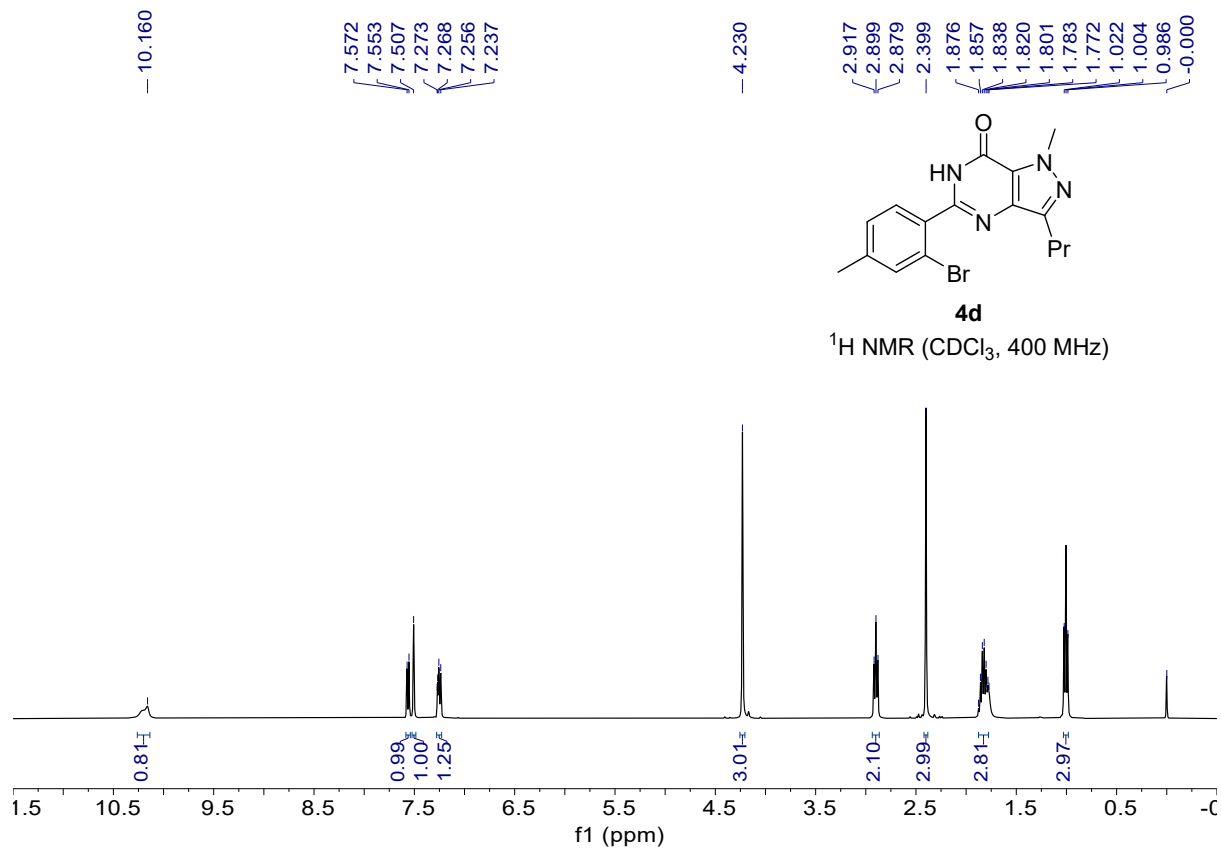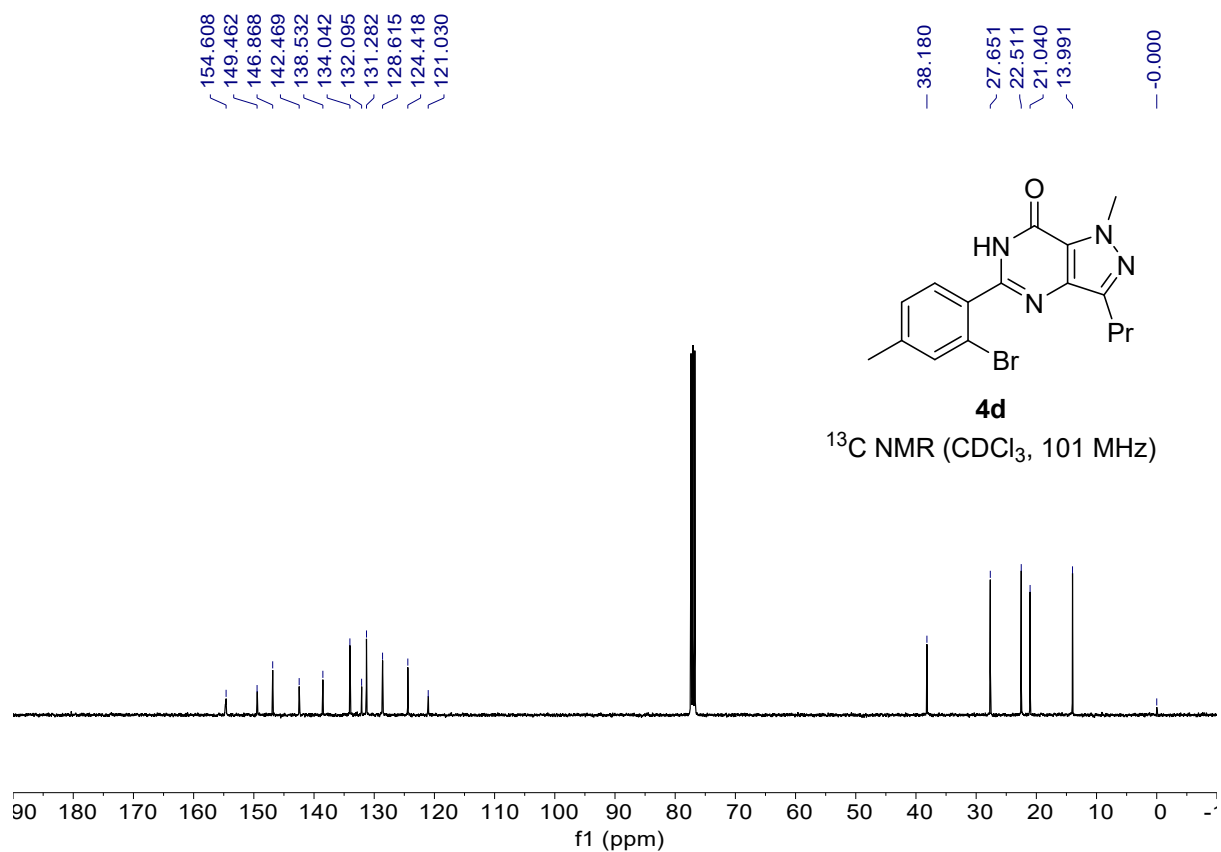

5-(2-bromo-5-fluorophenyl)-1-methyl-3-propyl-1,6-dihydro-7H-pyrazolo[4,3-d]pyrimidin-7-one (4e)

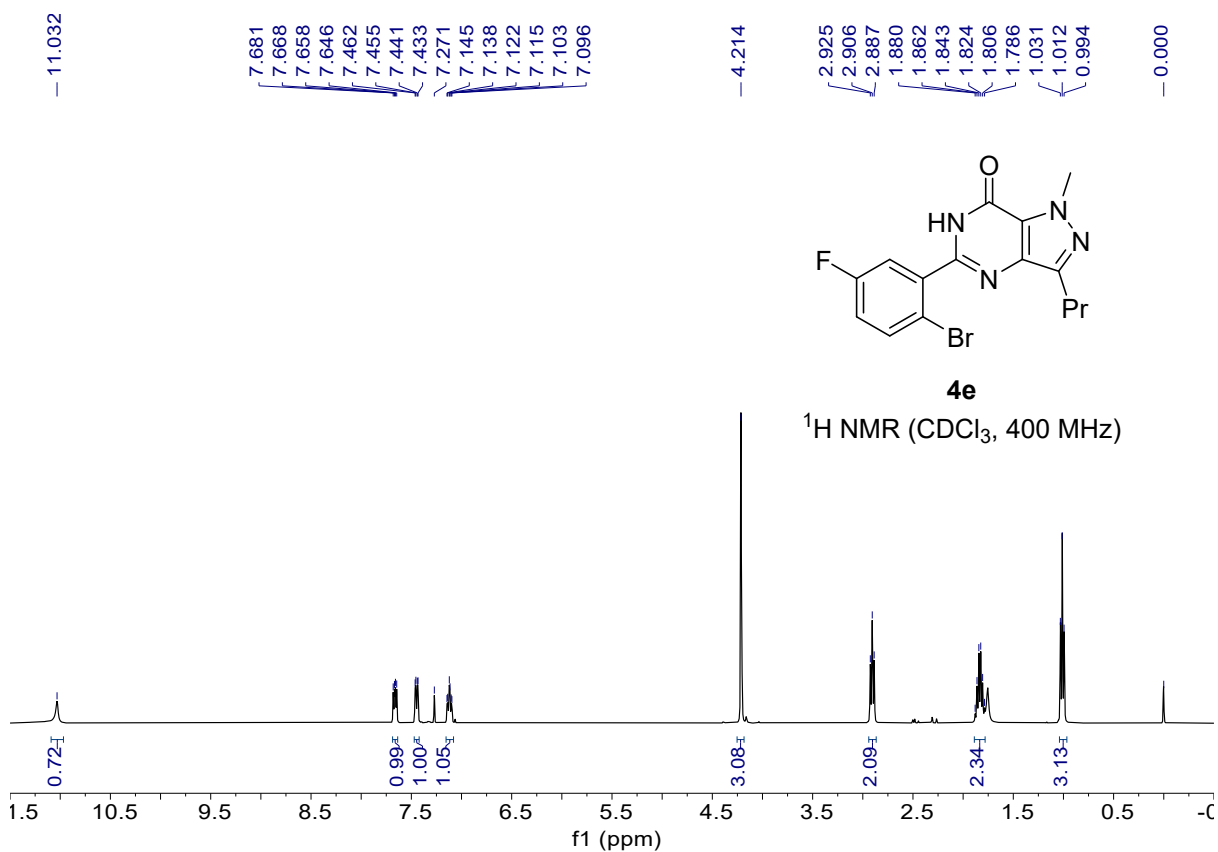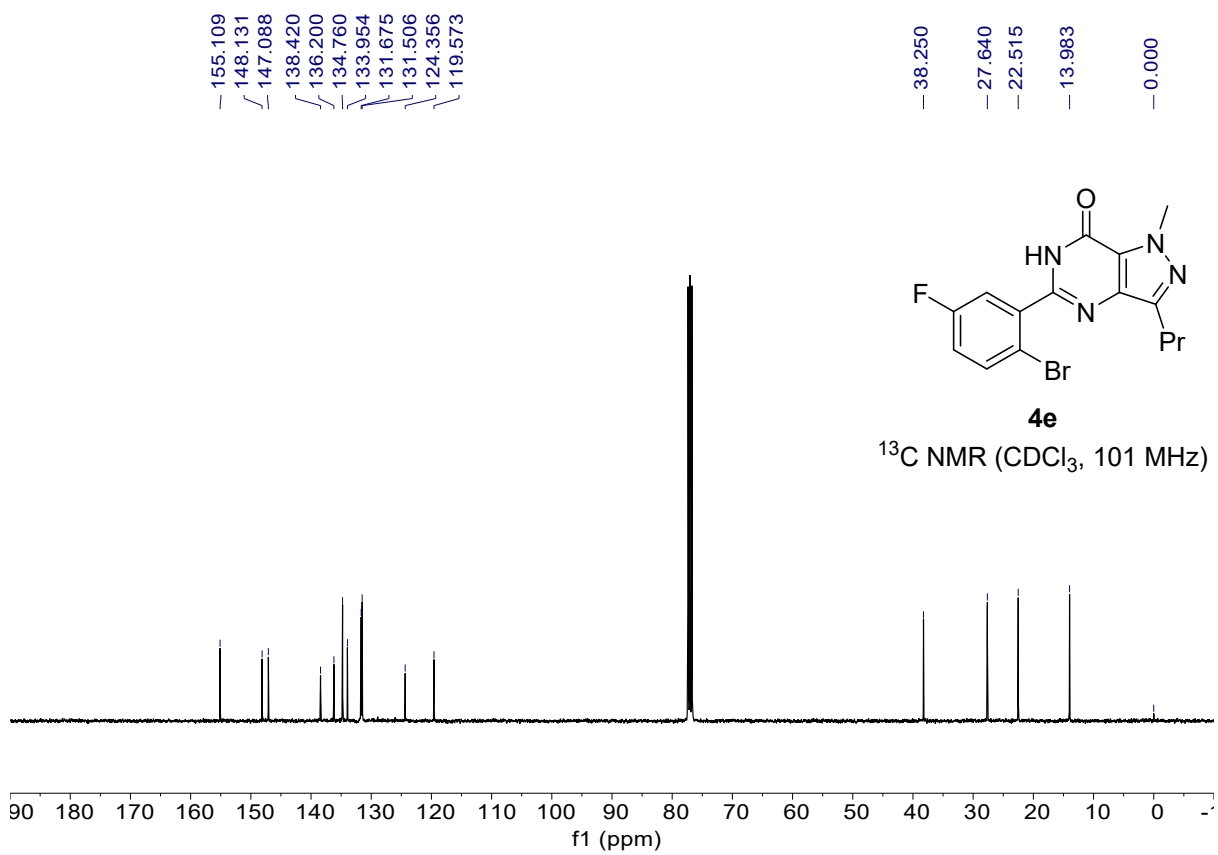

5-(2-bromo-5-chlorophenyl)-1-methyl-3-propyl-1,6-dihydro-7H-pyrazolo[4,3-d]pyrimidin-7-one (4f)

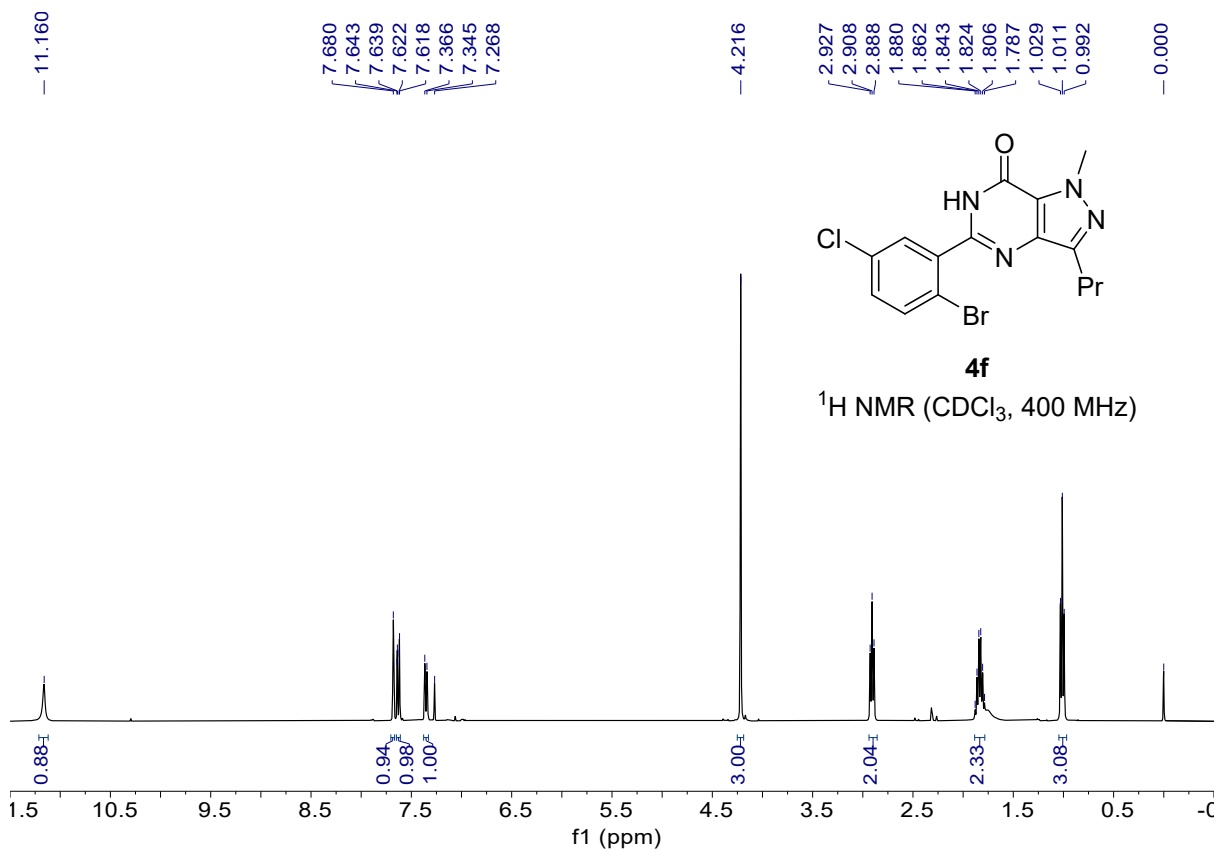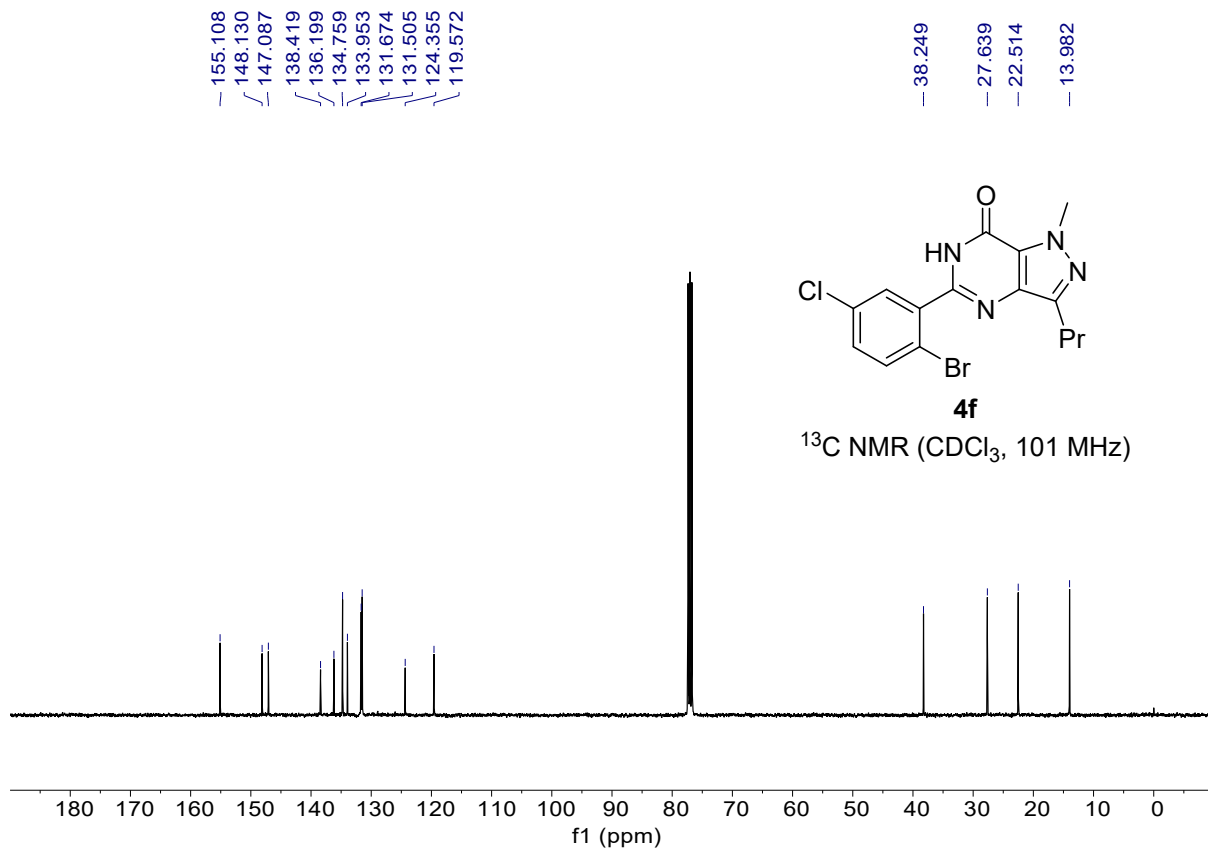

5-(2-bromo-5-methoxyphenyl)-1-methyl-3-propyl-1,6-dihydro-7H-pyrazolo[4,3-d]pyrimidin-7-one

(4g)

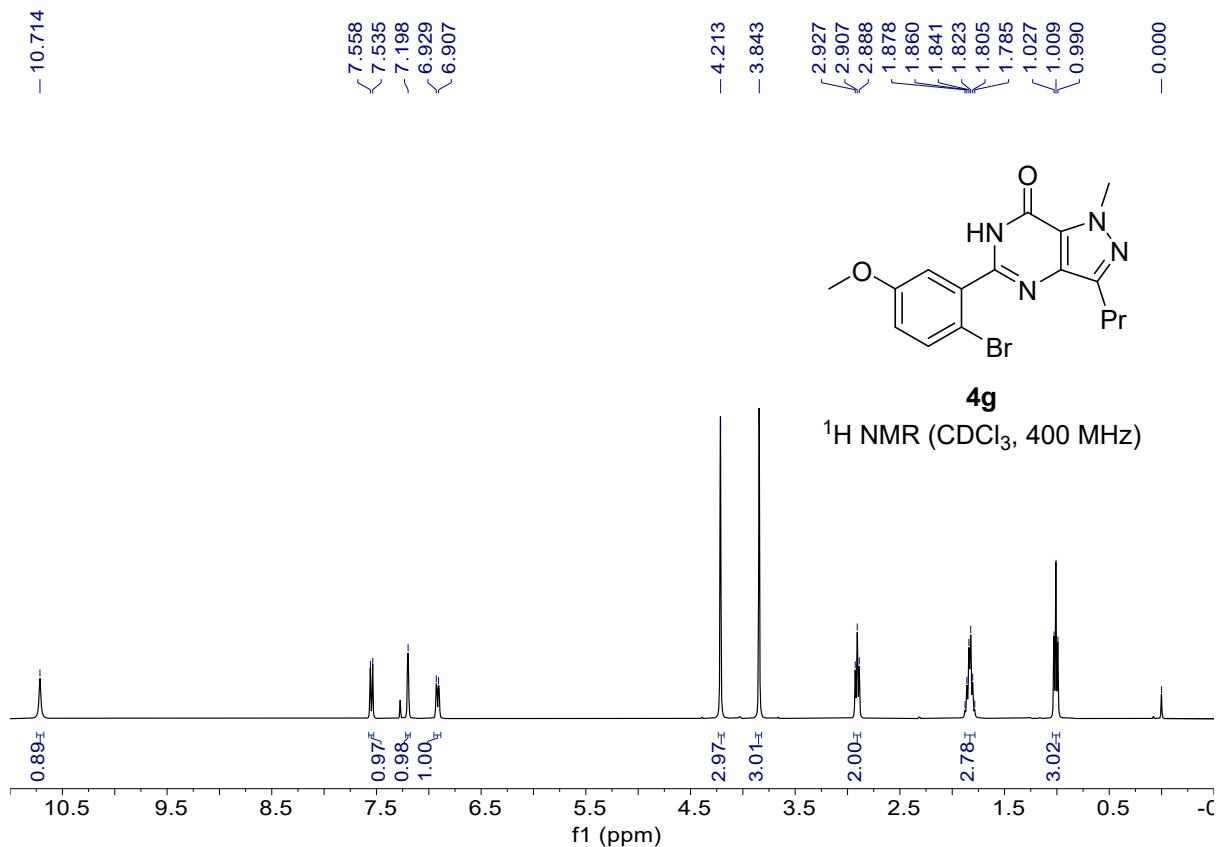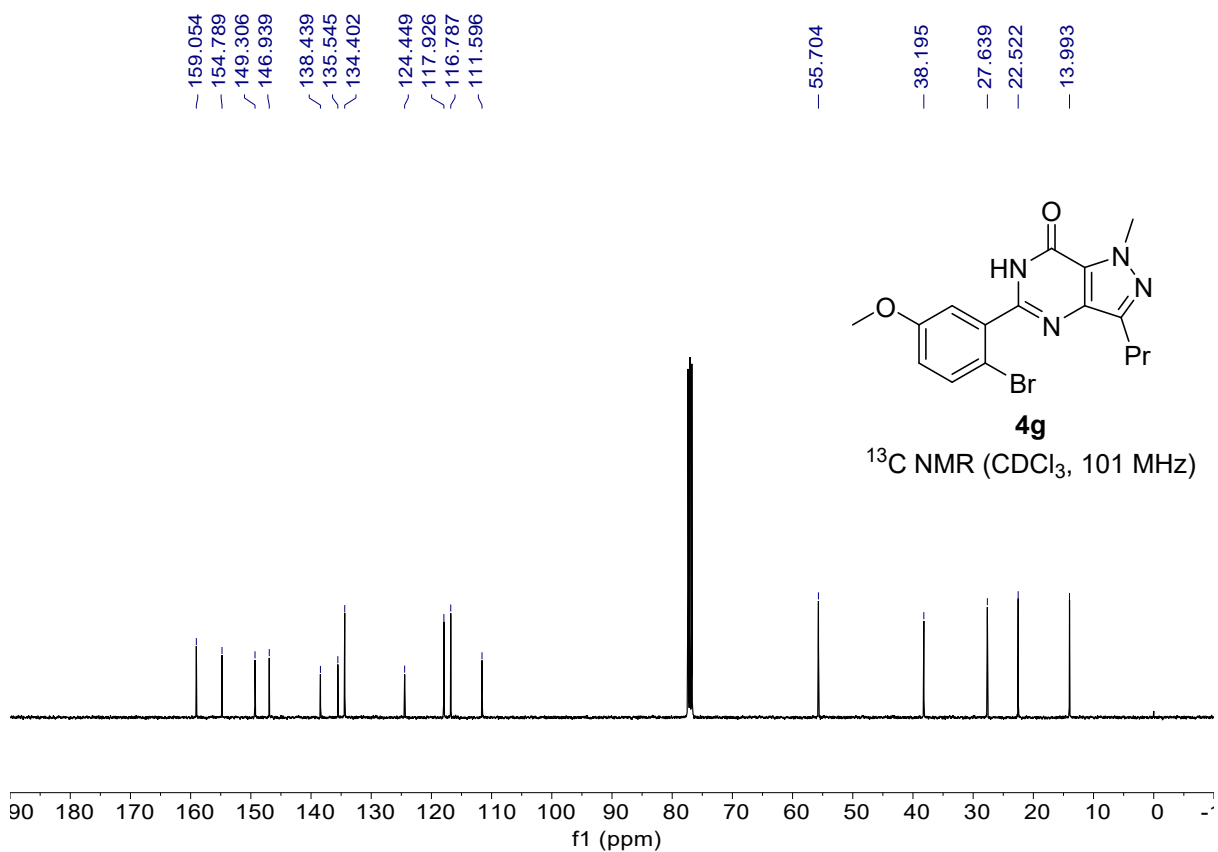



5-(2-bromo-6-fluorophenyl)-1-methyl-3-propyl-1,6-dihydro-7H-pyrazolo[4,3-d]pyrimidin-7-one (4h)

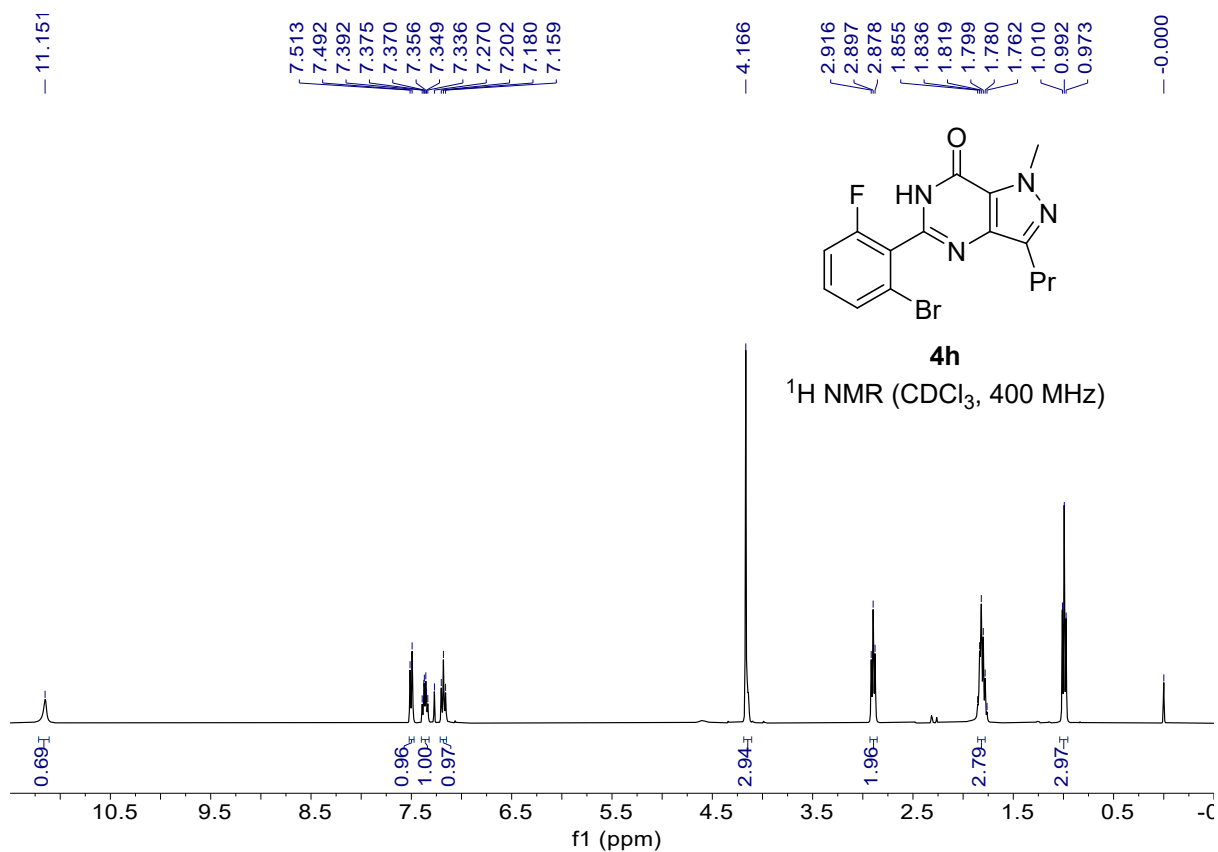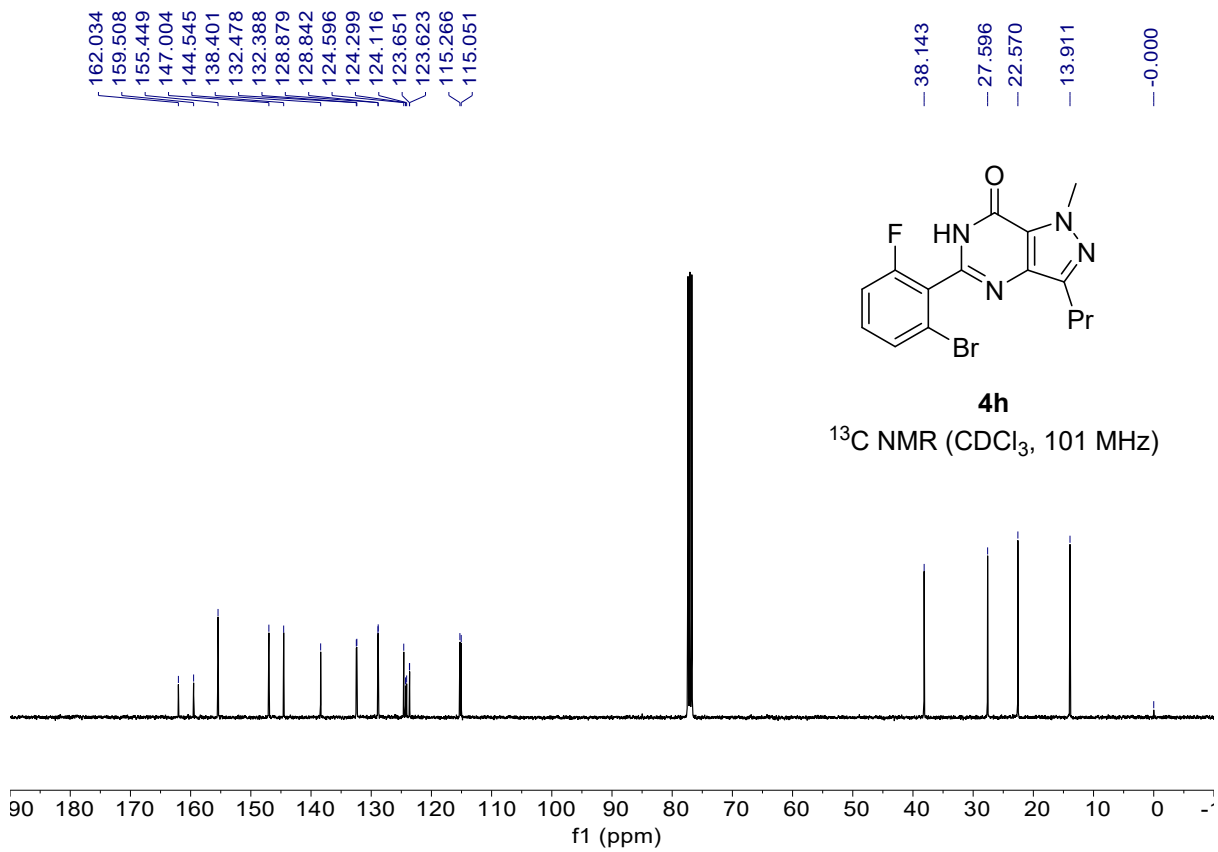

5-(1-bromonaphthalen-2-yl)-1-methyl-3-propyl-1,6-dihydro-7H-pyrazolo[4,3-d]pyrimidin-7-one (4i)

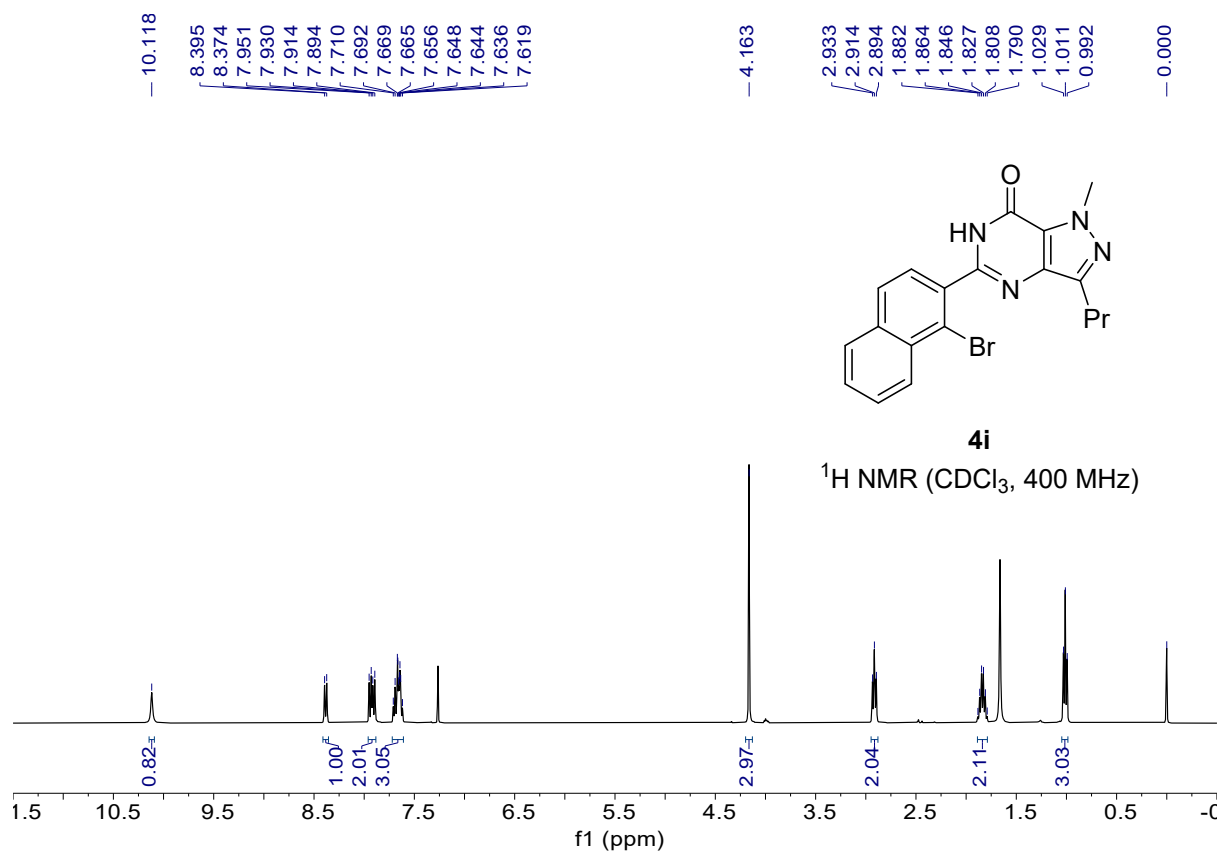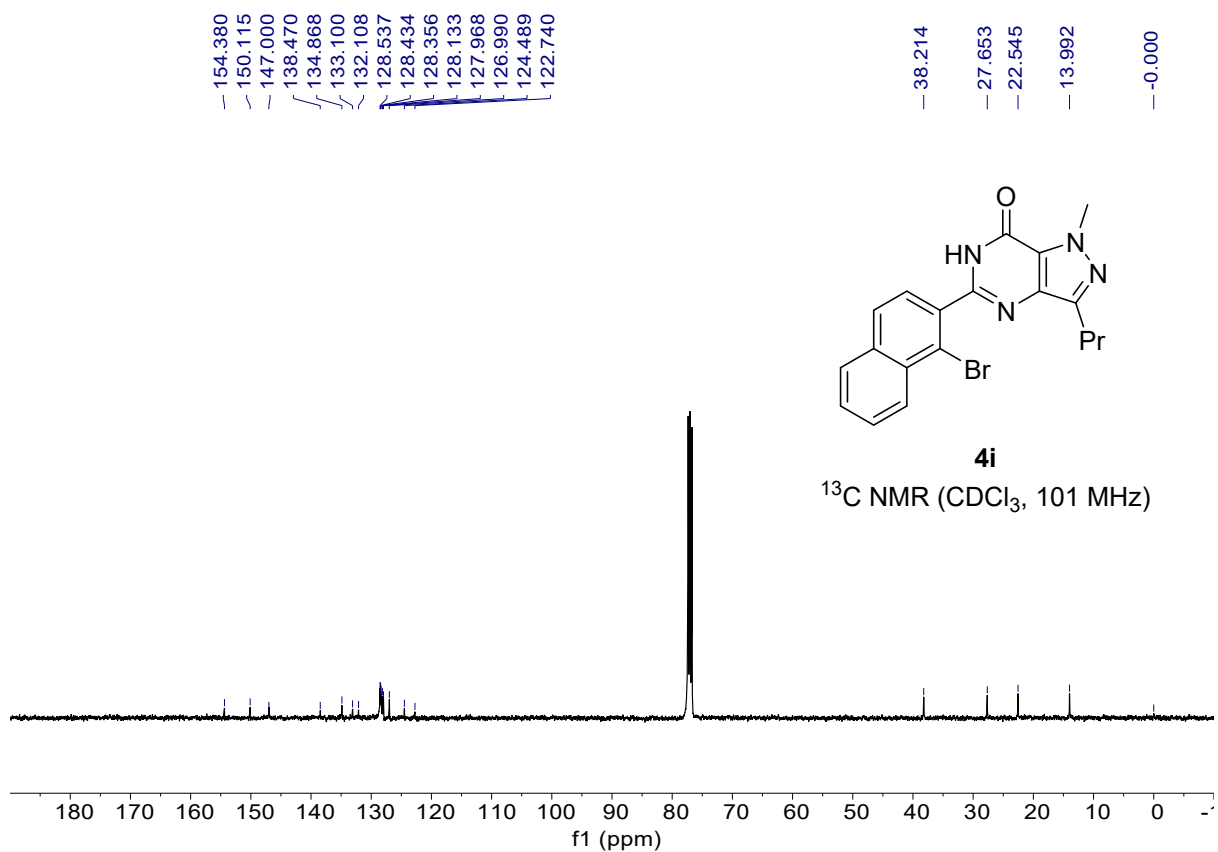

5-(6-bromobenzo[d][1,3]dioxol-5-yl)-1-methyl-3-propyl-1,6-dihydro-7H-pyrazolo[4,3-d]pyrimidin-7-one (4j)

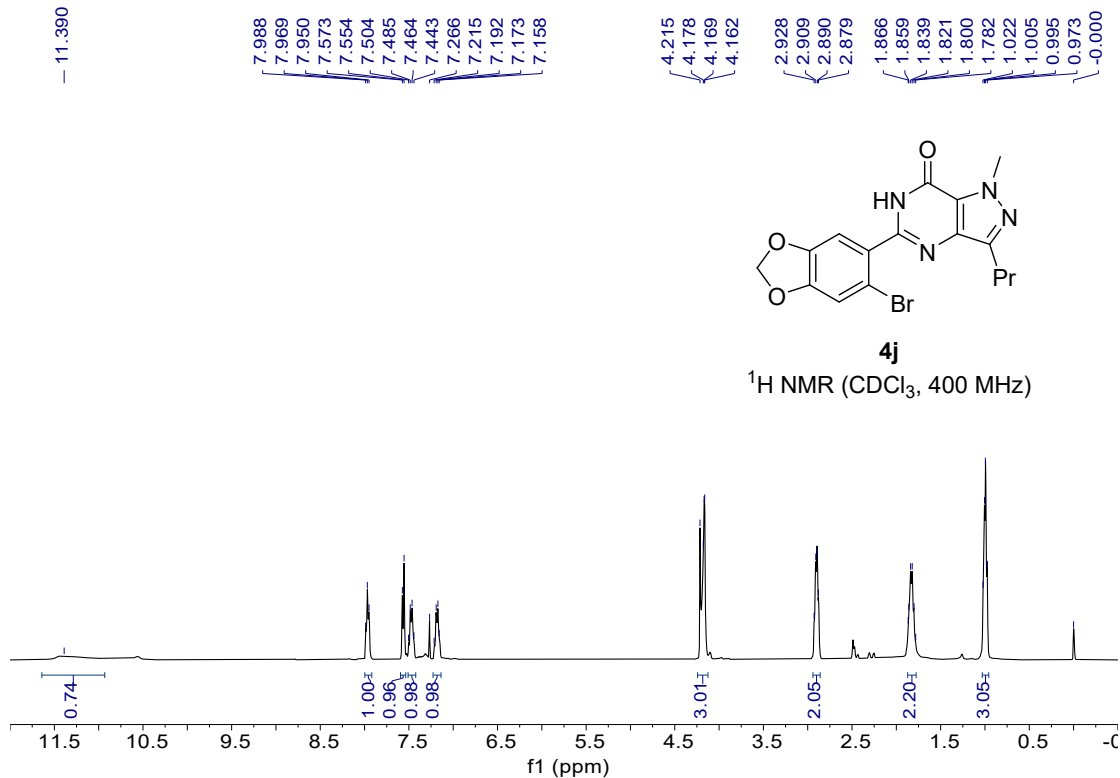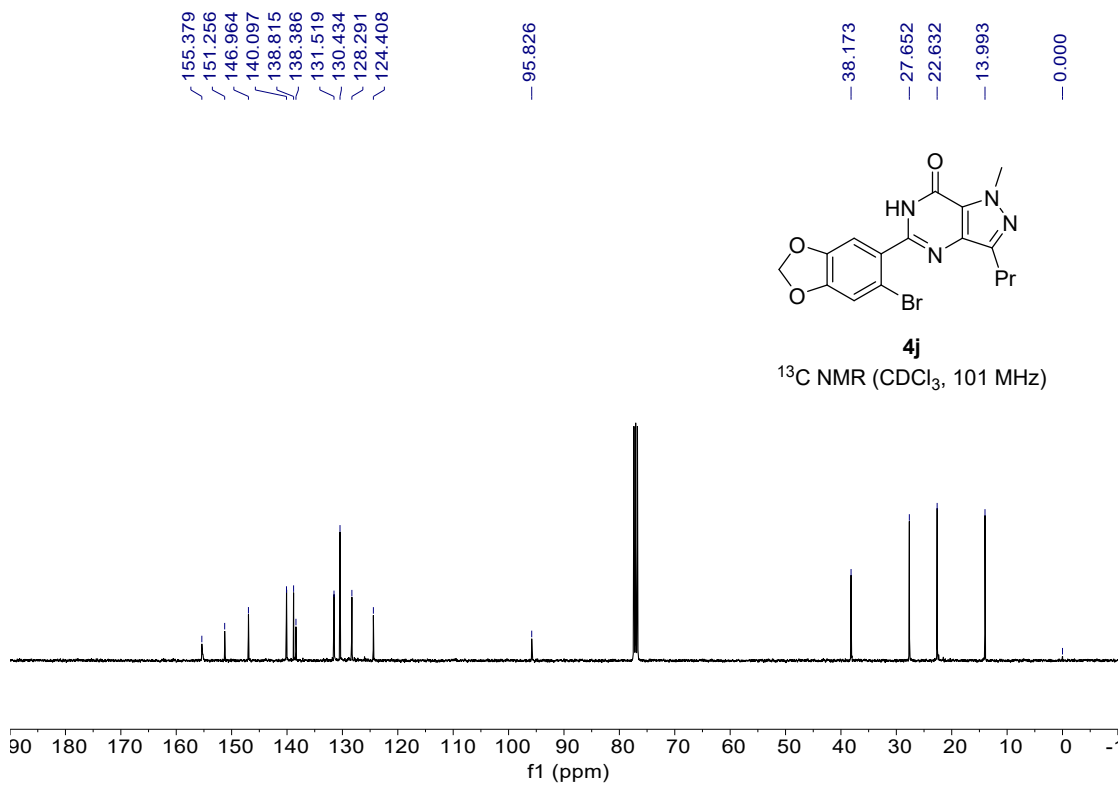

5-(2-bromo-4,5-dimethoxyphenyl)-1-methyl-3-propyl-1,6-dihydro-7H-pyrazolo[4,3-d]pyrimidin-7-one (4k)

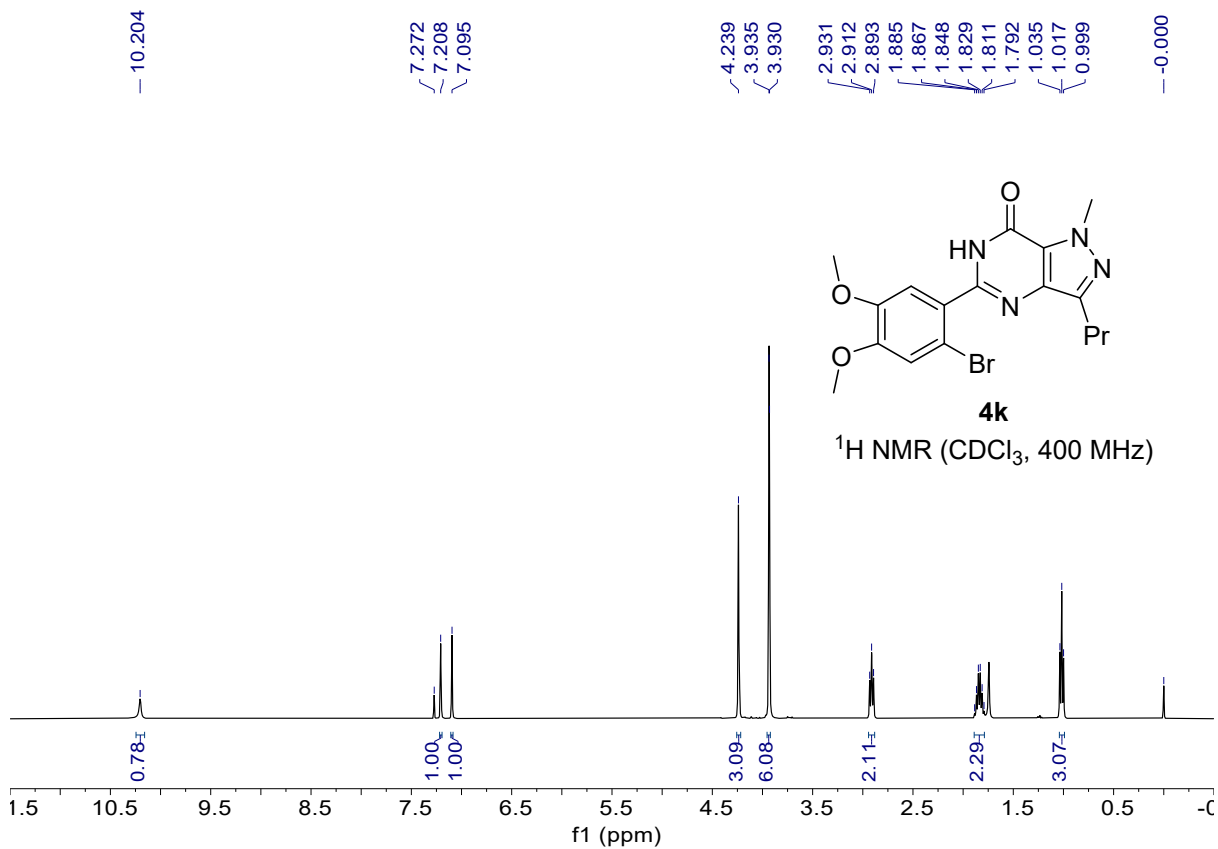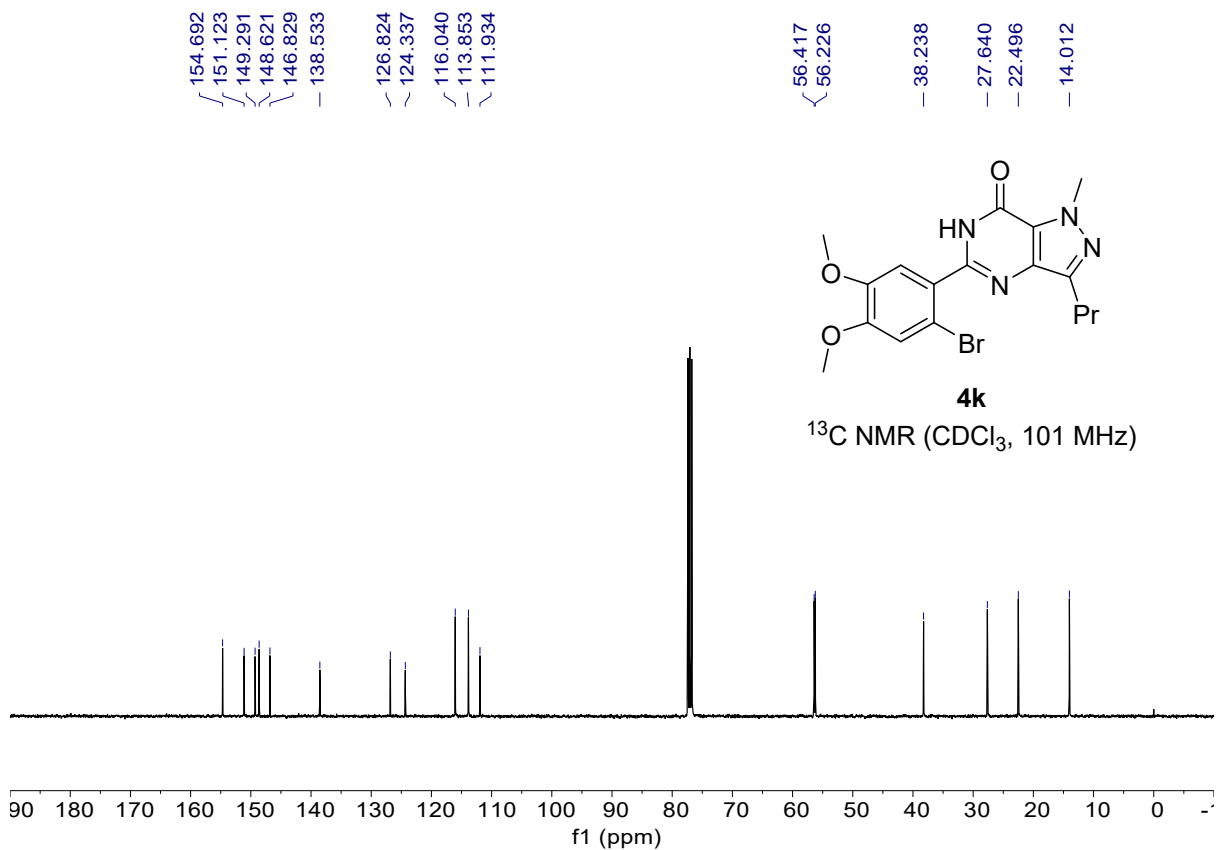

2-(2-bromo-5-methoxyphenyl)-5,6,7,8-tetrahydrobenzo[4,5]thieno[2,3-d]pyrimidin-4(3H)-one (7)

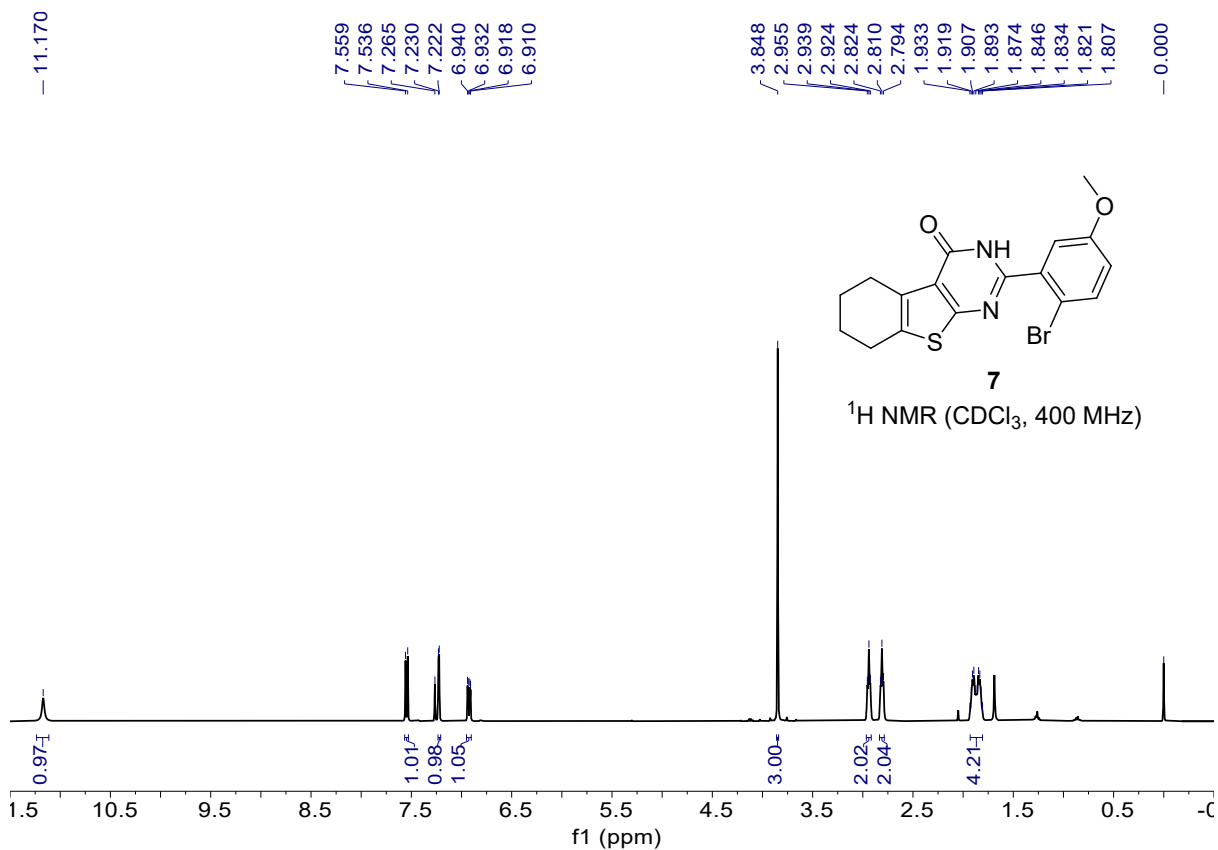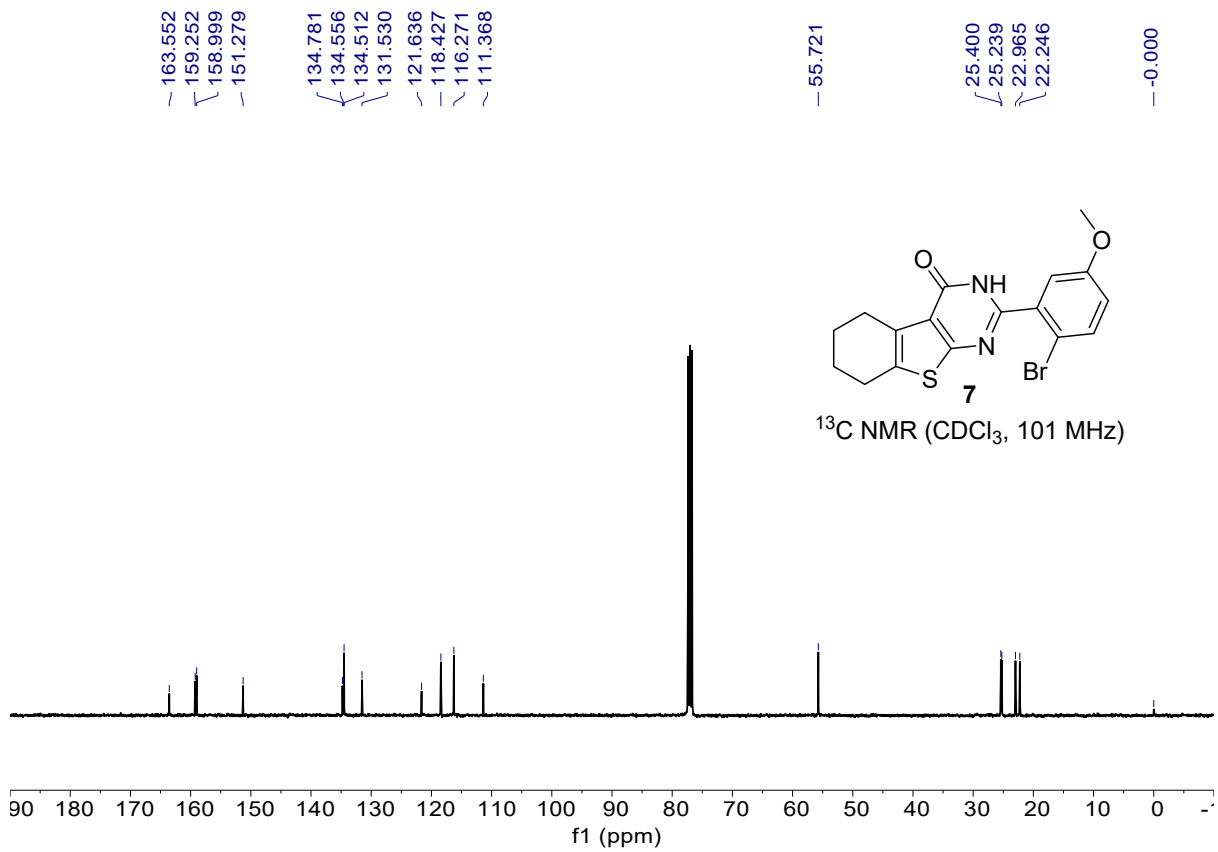

**(E)-12-benzylidene-12H-isoindolo[2,1-a]perimidine (3a)**

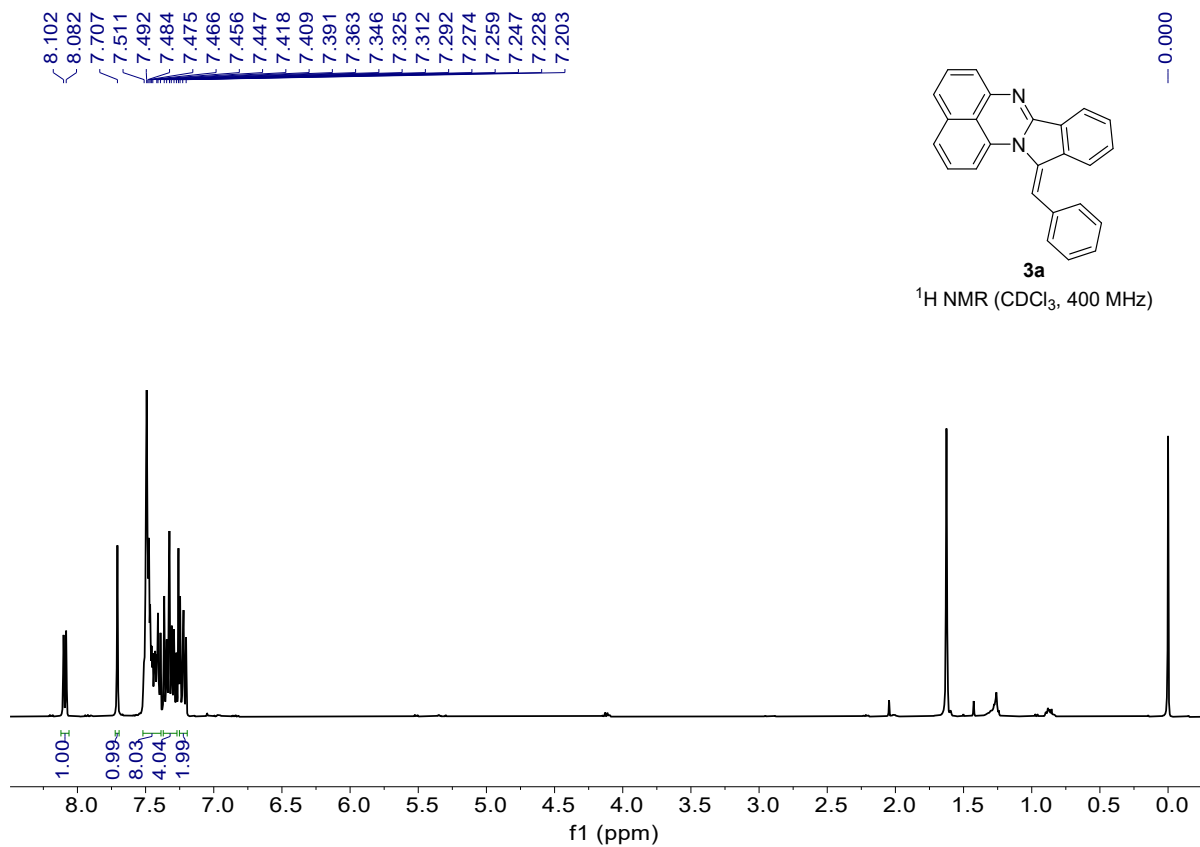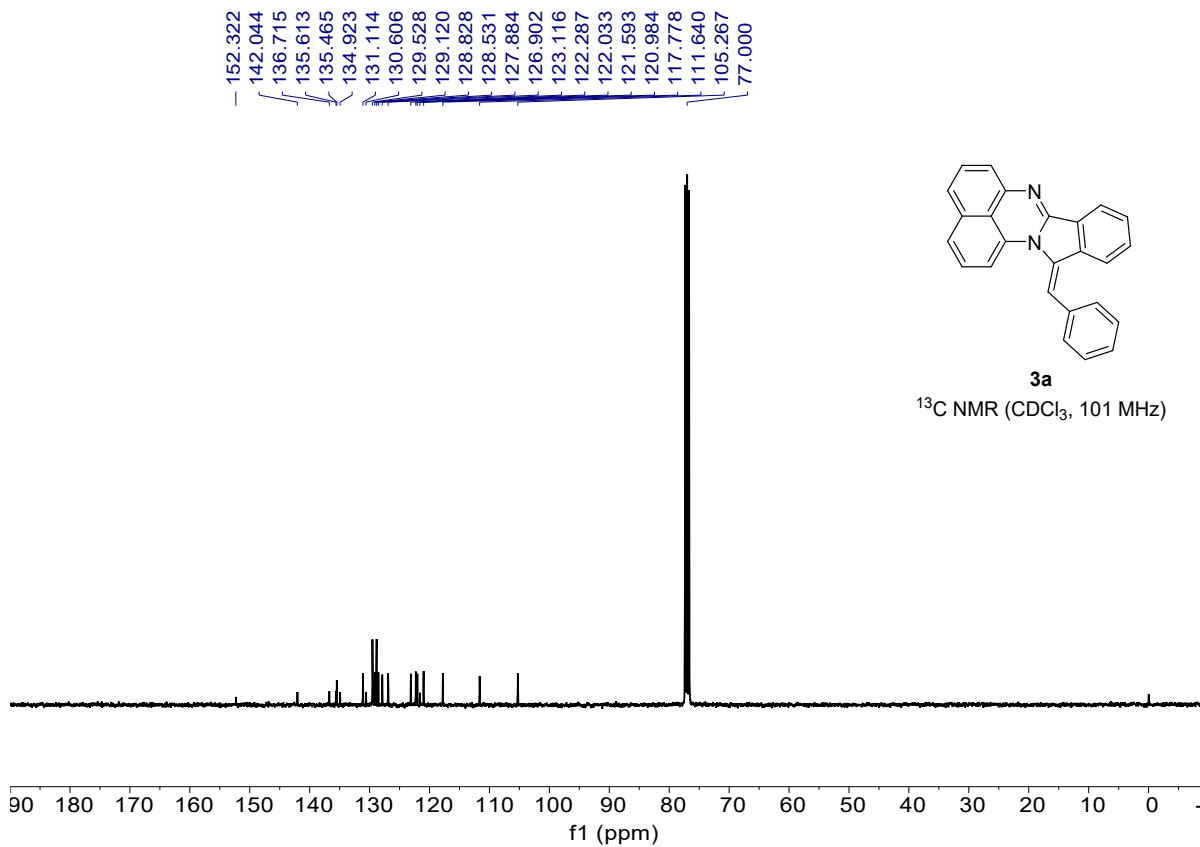

**(E)-12-benzylidene-10-fluoro-12H-isoindolo[2,1-a]perimidine (3b)**

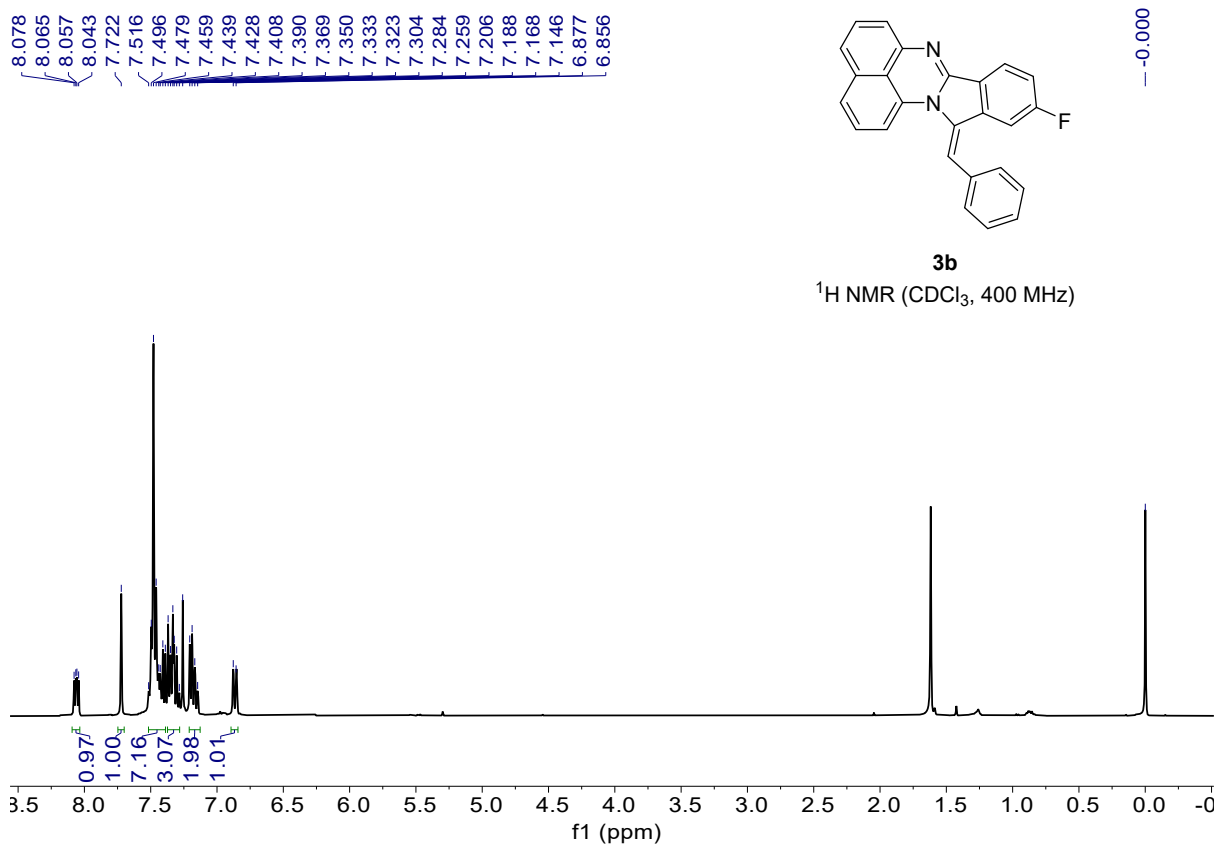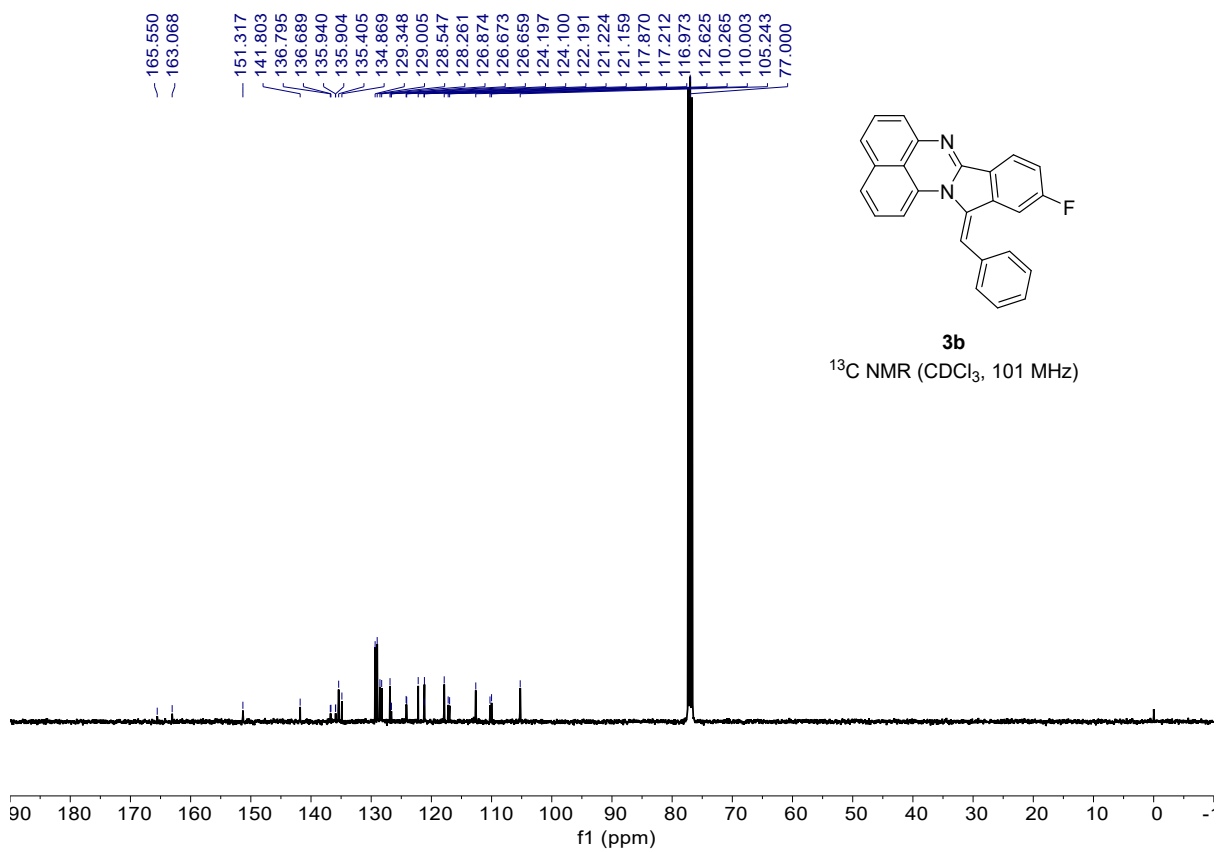

**(E)-12-benzylidene-10-chloro-12H-isoindolo[2,1-a]perimidine (3c)**

8.013  
7.992  
7.721  
7.524  
7.503  
7.486  
7.472  
7.455  
7.441  
7.425  
7.420  
7.407  
7.387  
7.370  
7.350  
7.333  
7.324  
7.303  
7.285  
7.260  
7.202  
7.185  
7.171

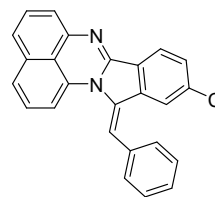

**3c**

<sup>1</sup>H NMR (CDCl<sub>3</sub>, 400 MHz)

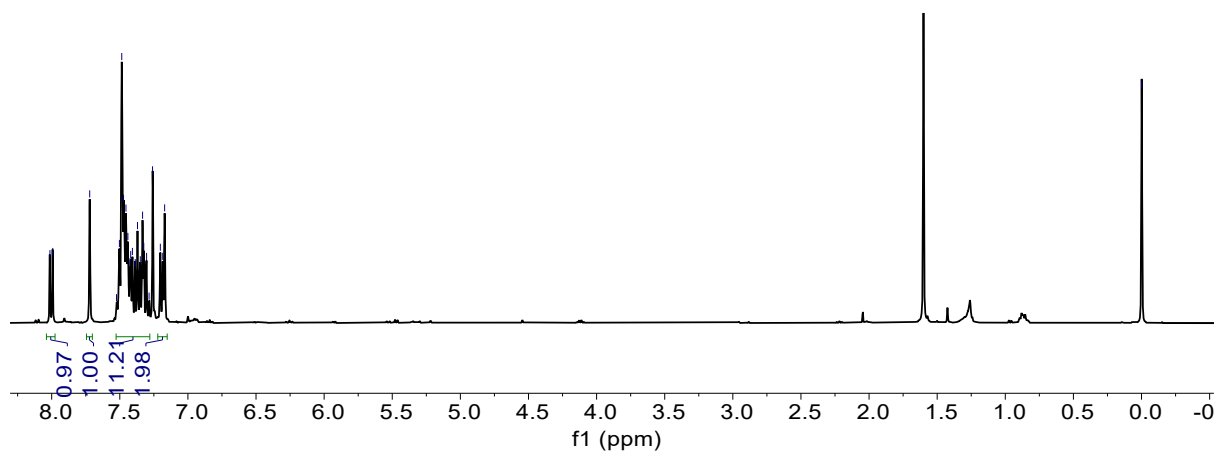

151.365  
141.788  
137.123  
136.190  
135.708  
135.437  
135.404  
134.848  
129.516  
129.385  
128.987  
128.975  
128.561  
128.313  
126.894  
123.362  
123.267  
122.314  
121.417  
121.227  
117.983  
112.599  
105.318  
77.000

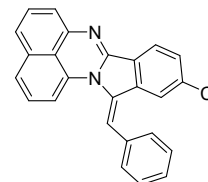

**3c**

<sup>13</sup>C NMR (CDCl<sub>3</sub>, 101 MHz)

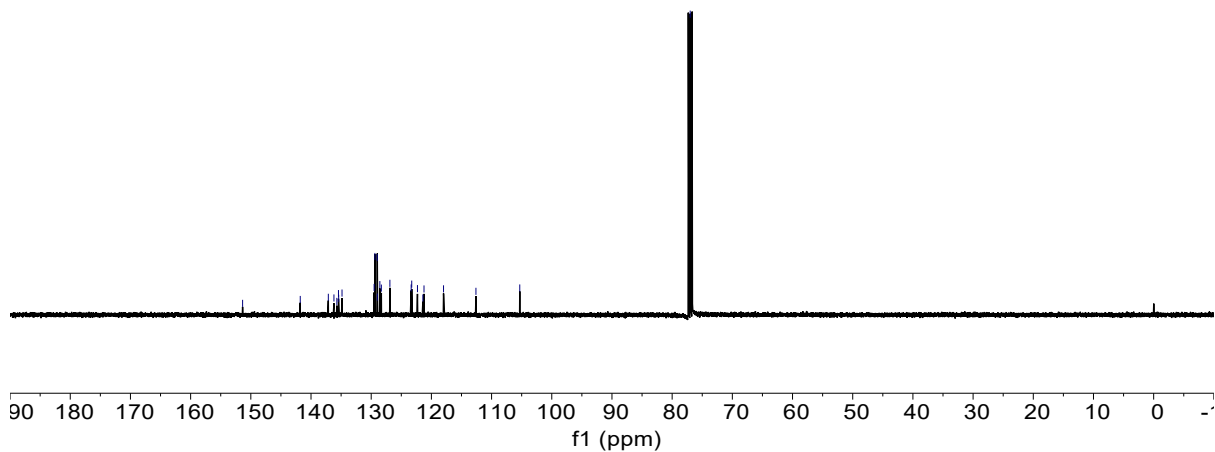



**(E)-12-benzylidene-9-fluoro-12H-isoindolo[2,1-a]perimidine (3d)**

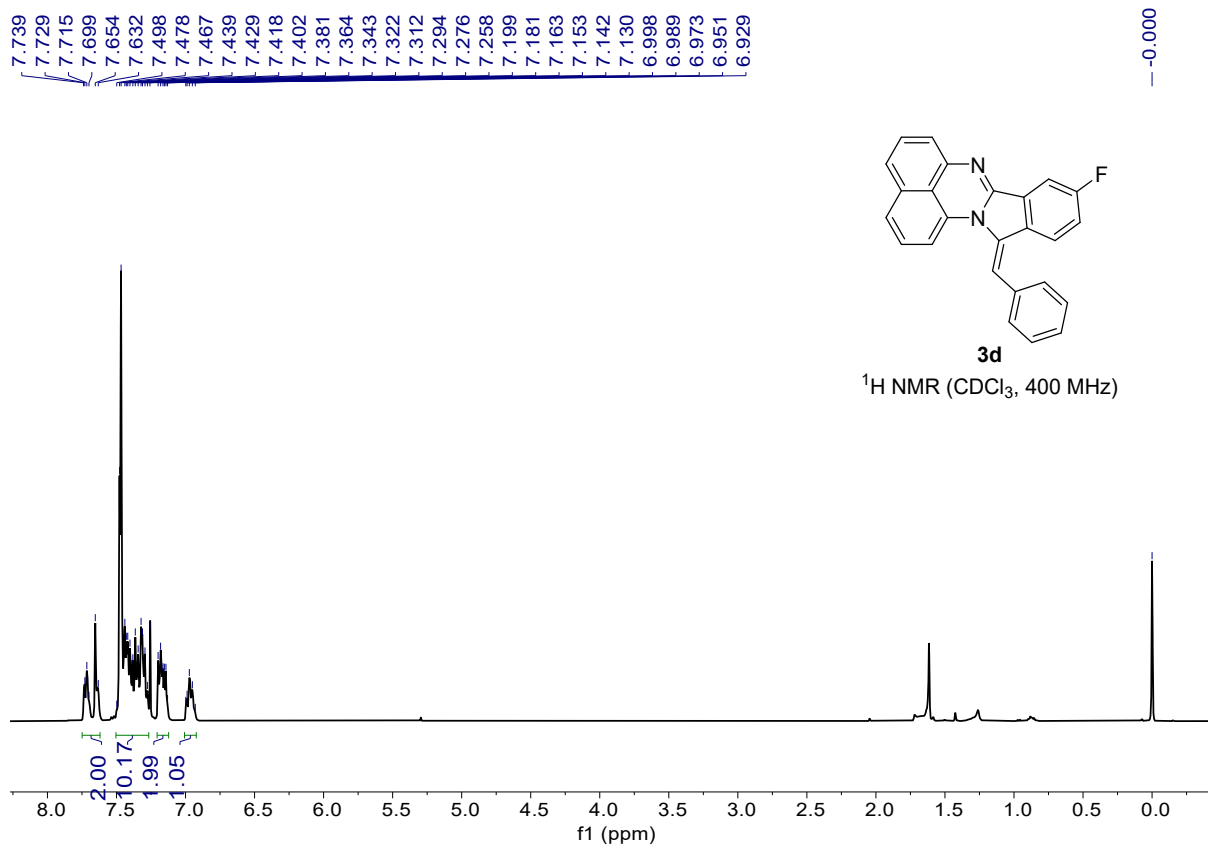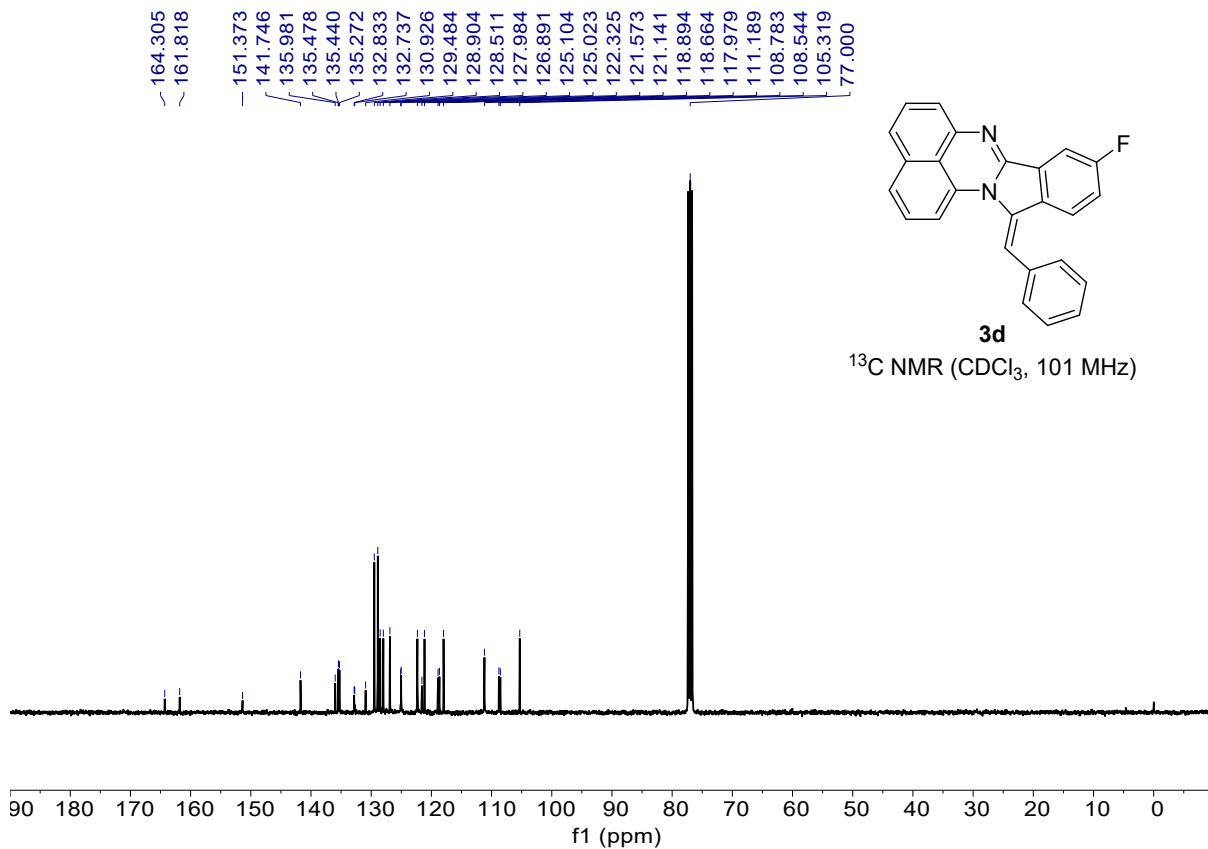

**(E)-12-benzylidene-9-chloro-12H-isoindolo[2,1-a]perimidine (3e)**

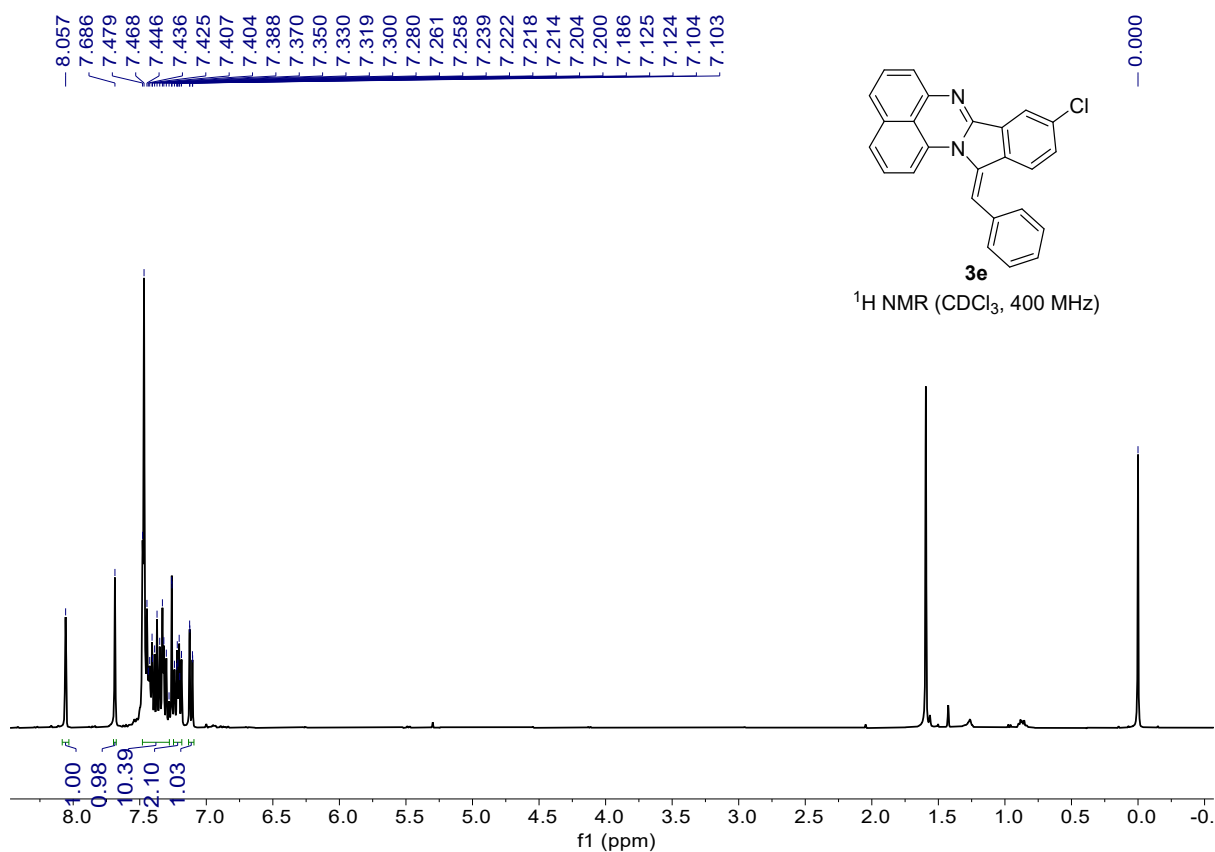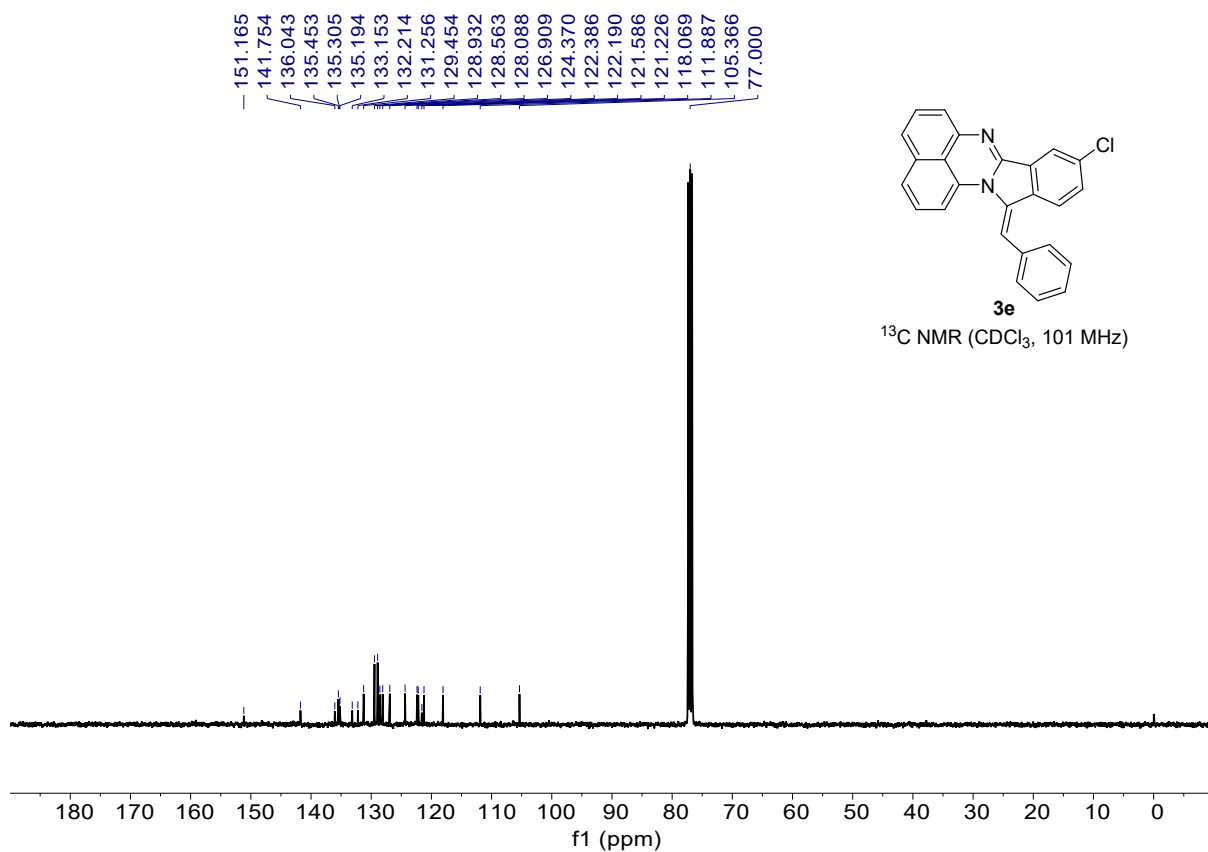

**(E)-12-benzylidene-9-methoxy-12H-isoindolo[2,1-a]perimidine (3f)**

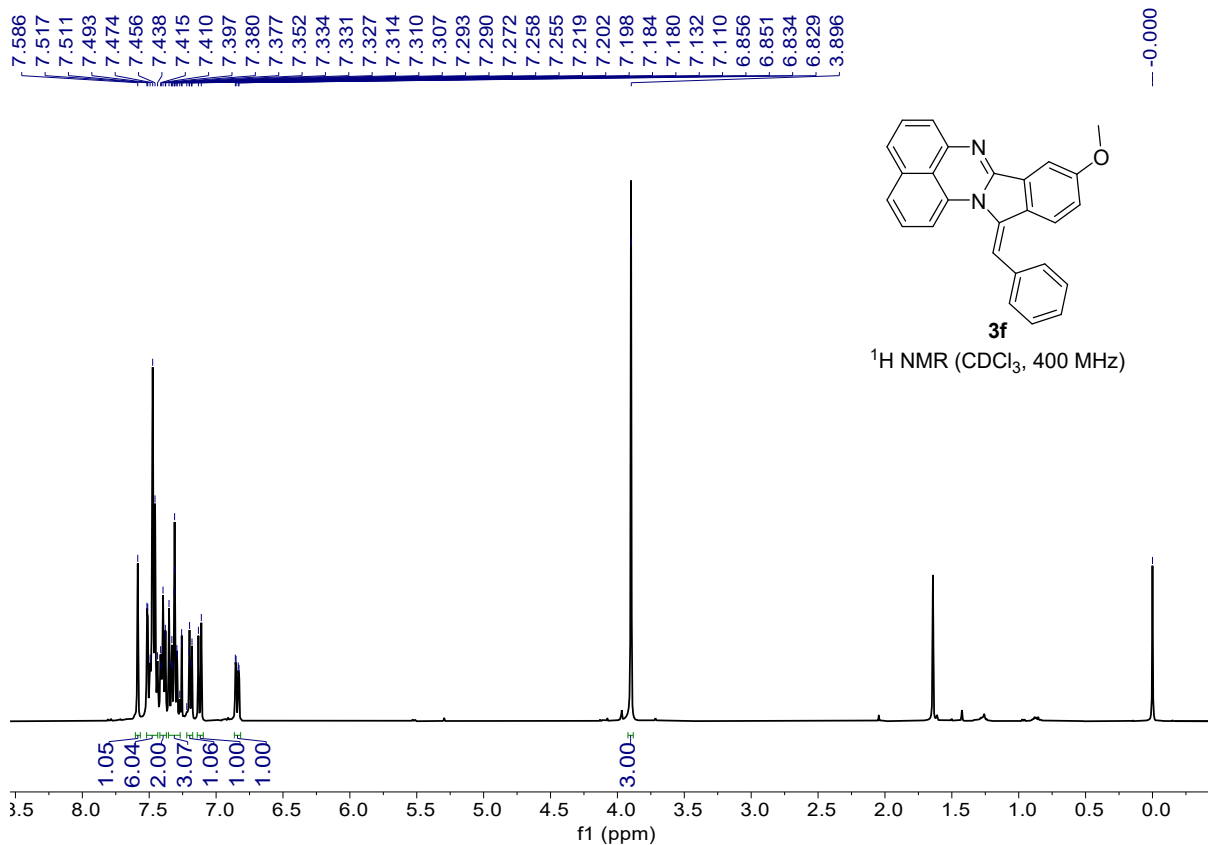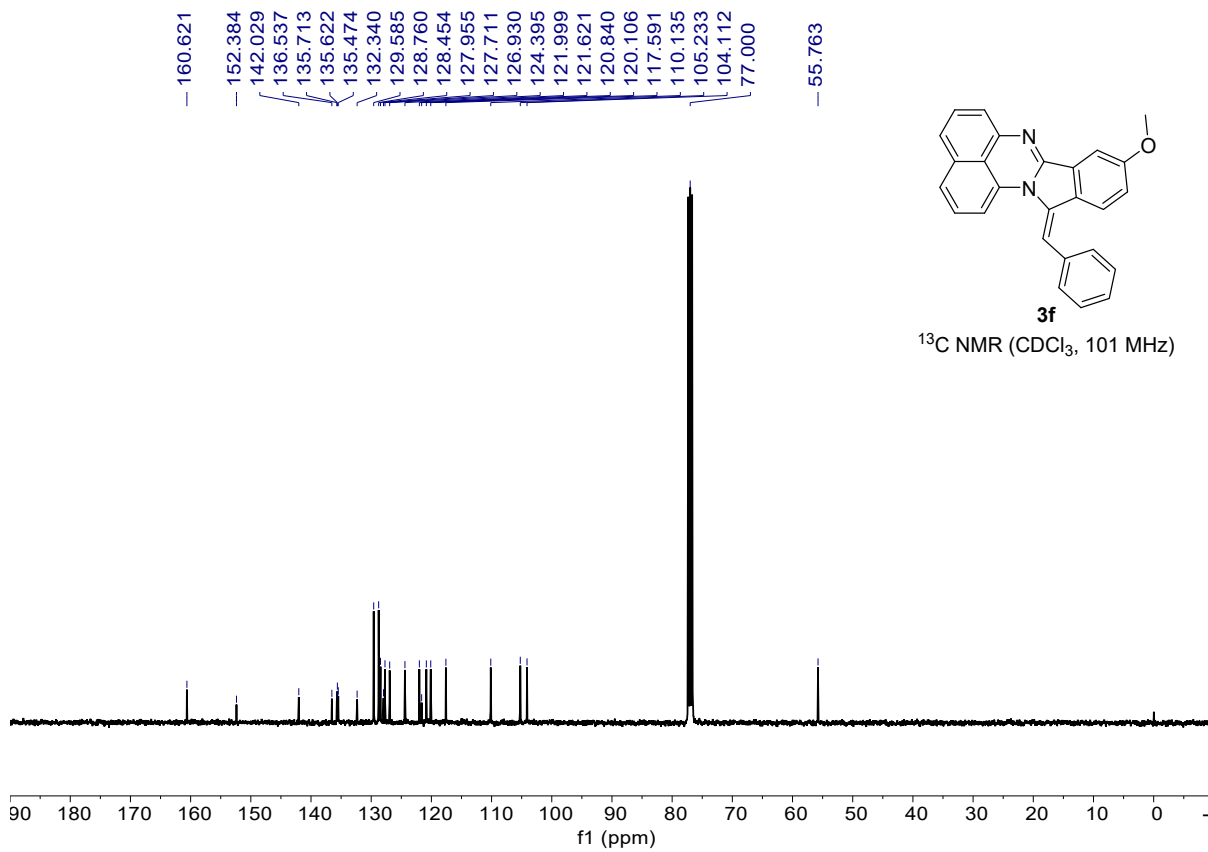

**(E)-12-benzylidene-8-fluoro-12H-isoindolo[2,1-a]perimidine (3g)**

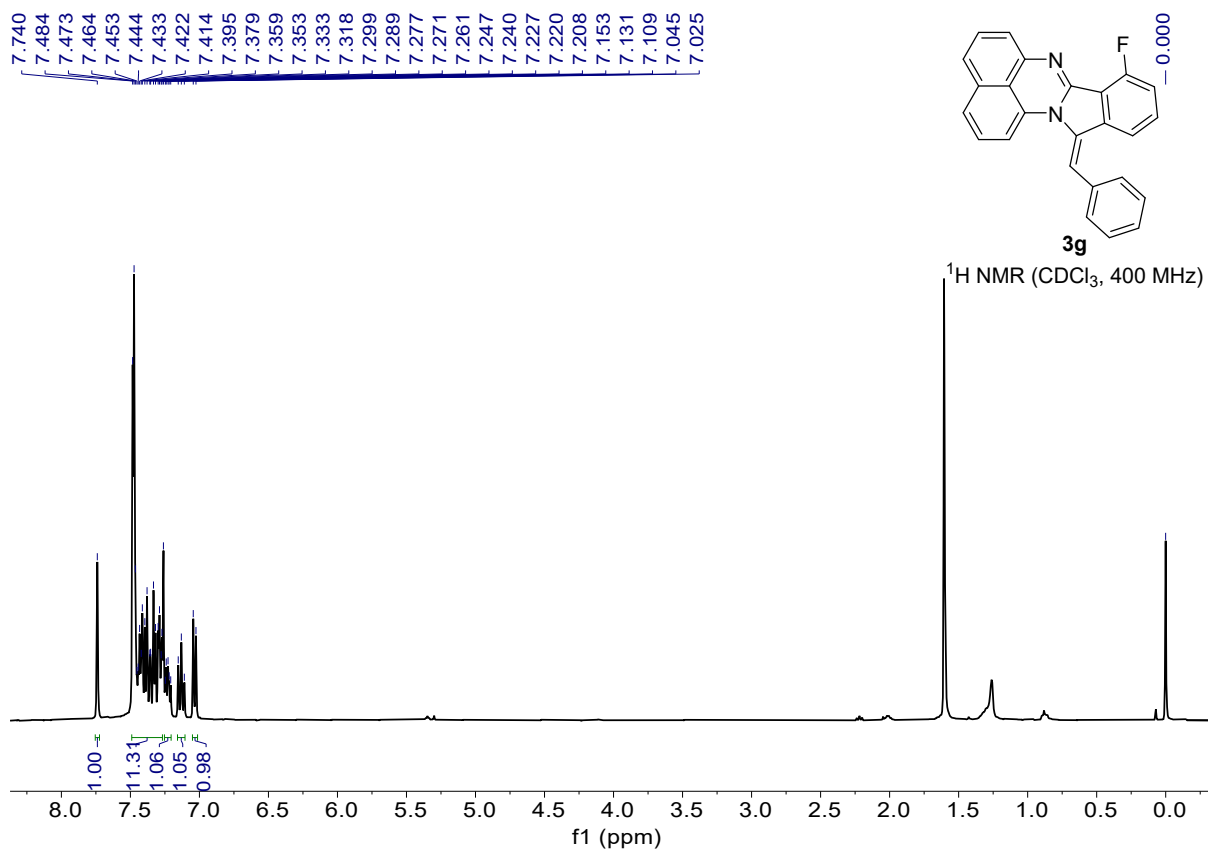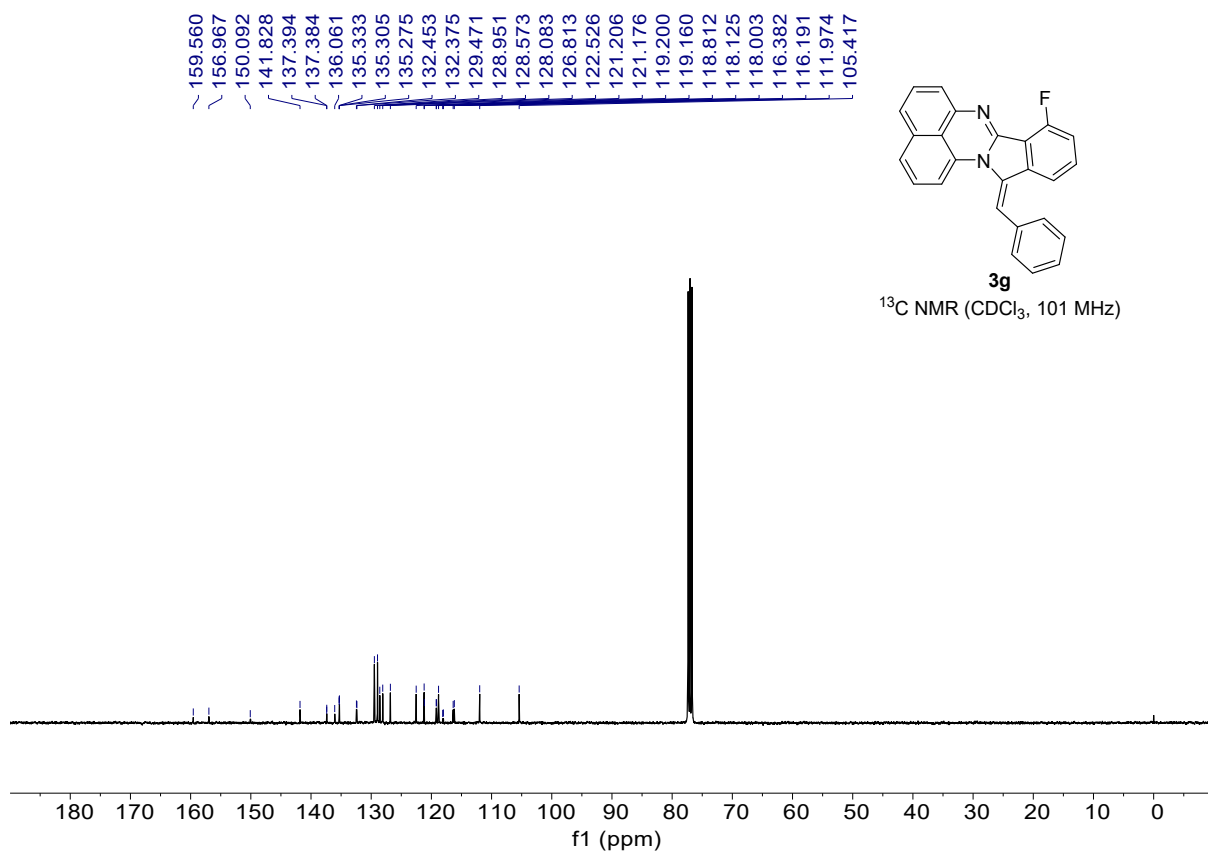

**(E)-13-benzylidene-13H-[1,3]dioxolo[4',5':5,6]isoindolo[2,1- $\sigma$ ]perimidin (3h)**

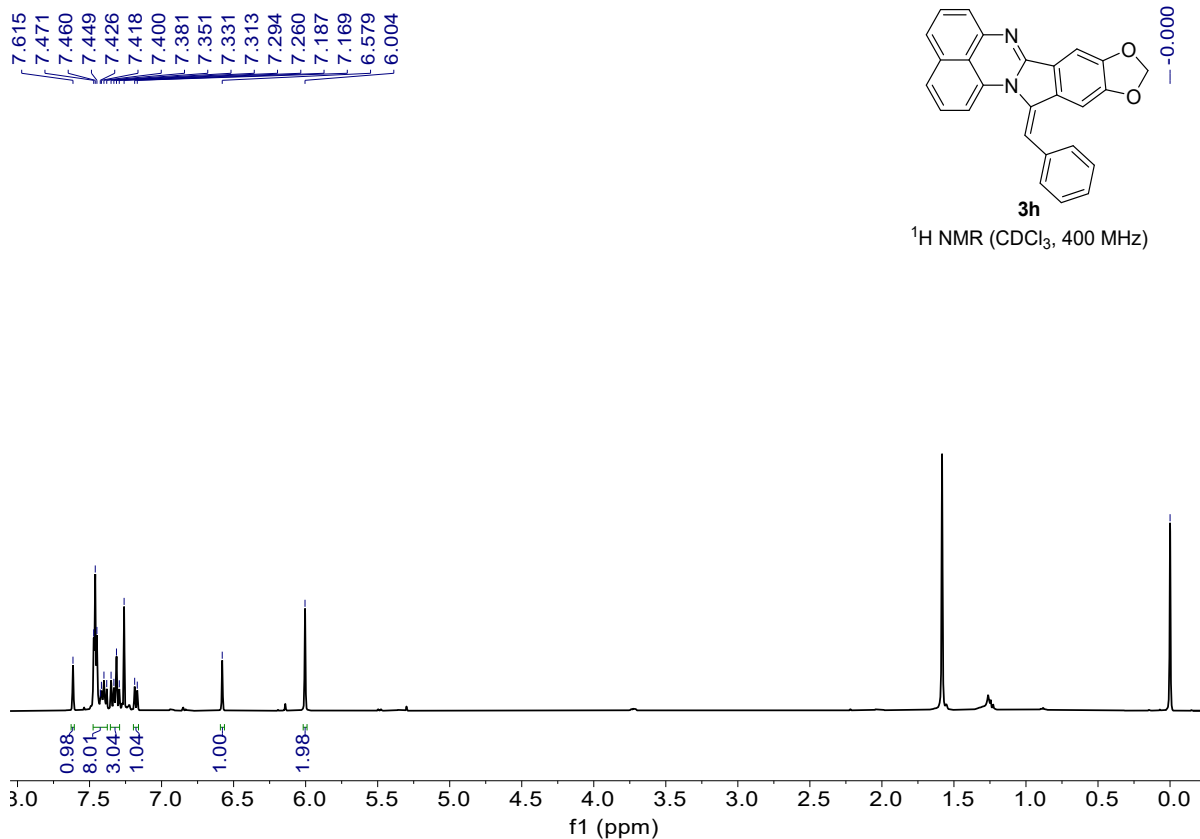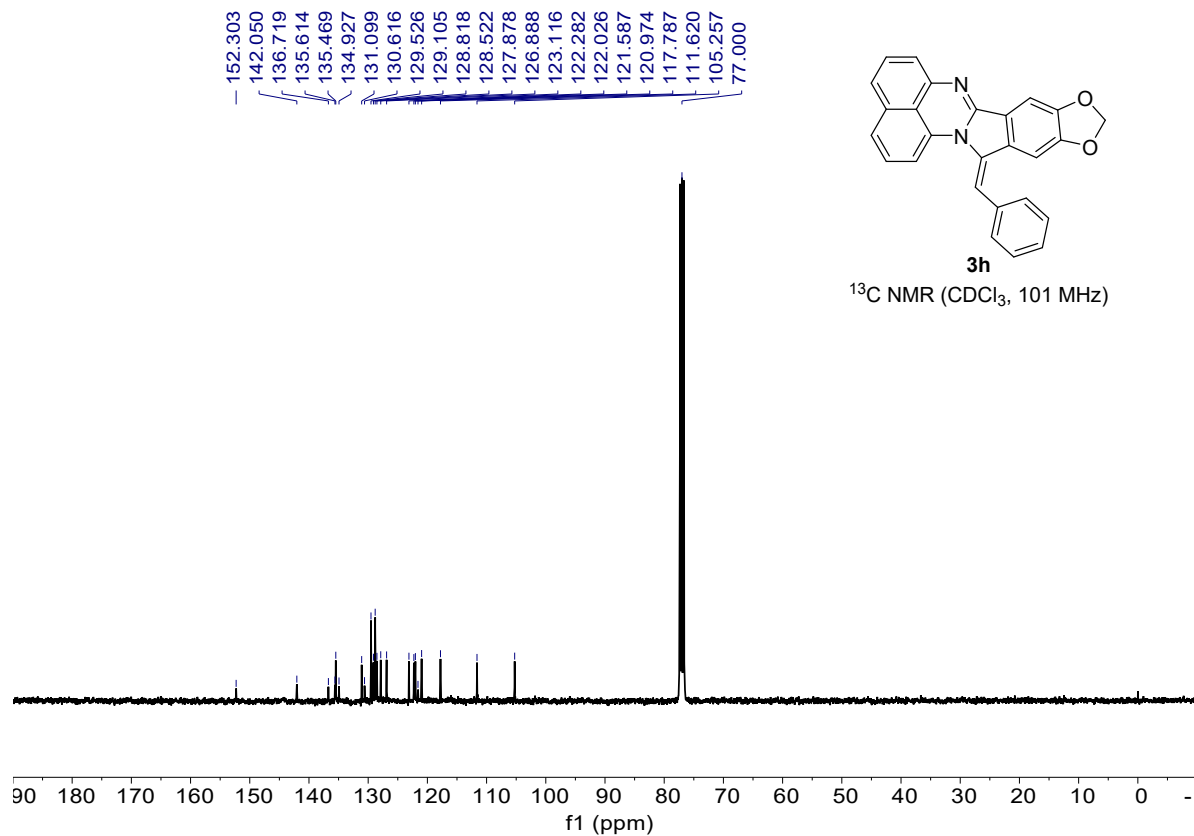

**(E)-14-benzylidene-14H-benzo[5,6]isoindolo[2,1-a]perimidine (3i)**

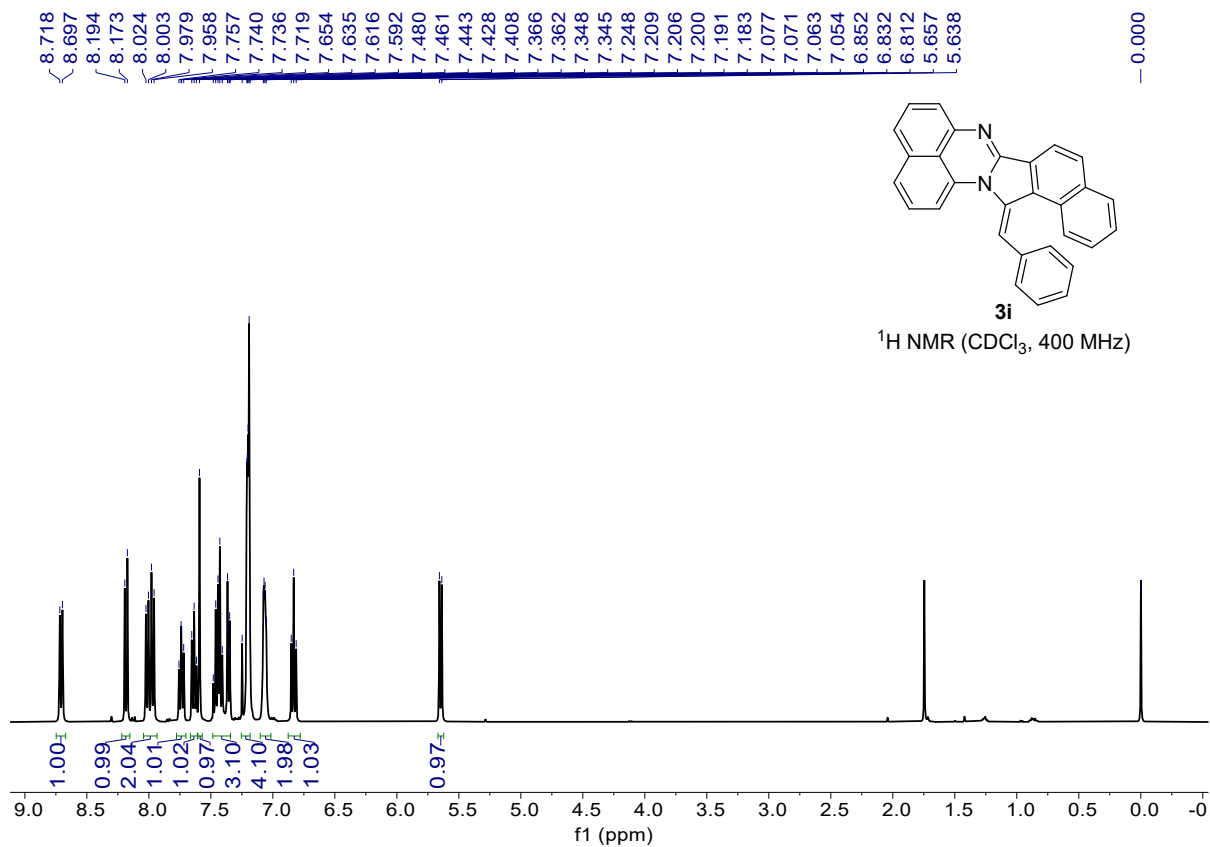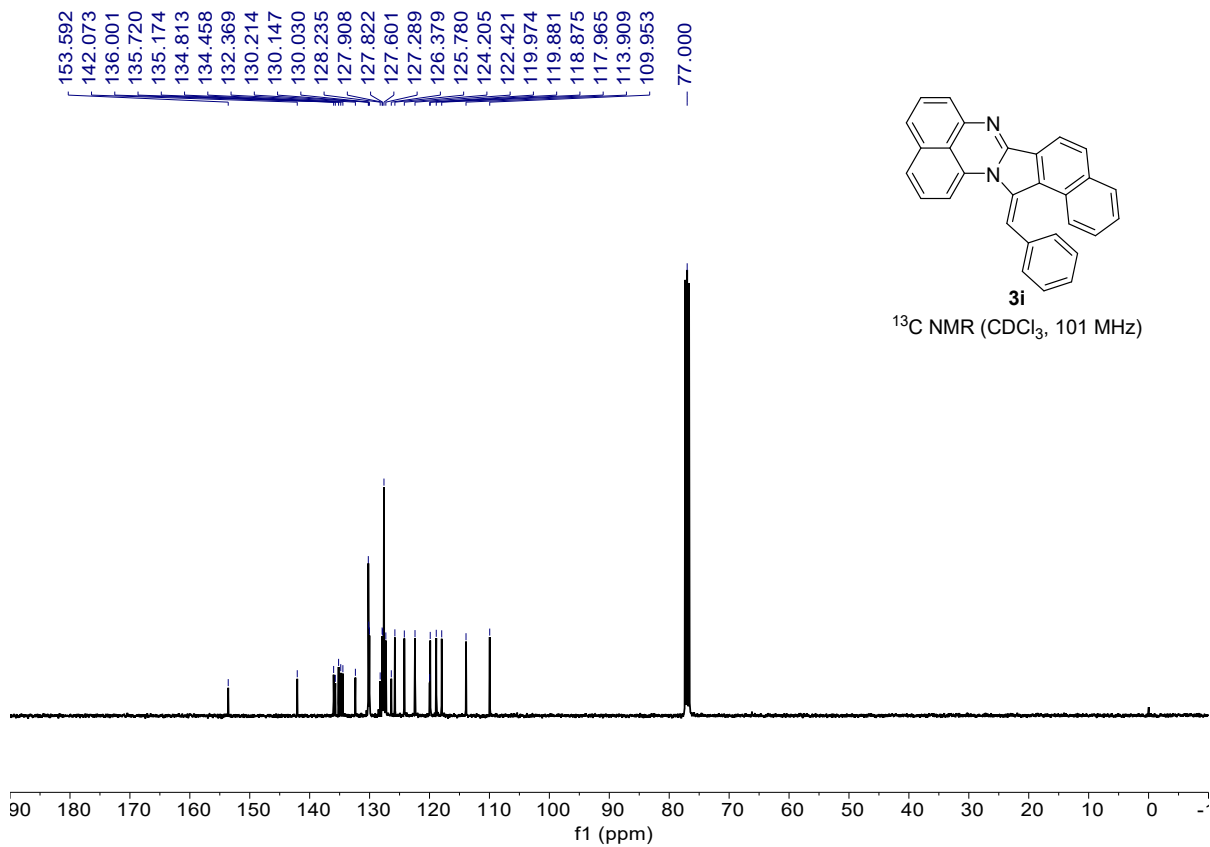

**(E)-12-benzylidene-12H-pyrido[3',2':3,4]pyrrolo[1,2-a]perimidine (3j)**

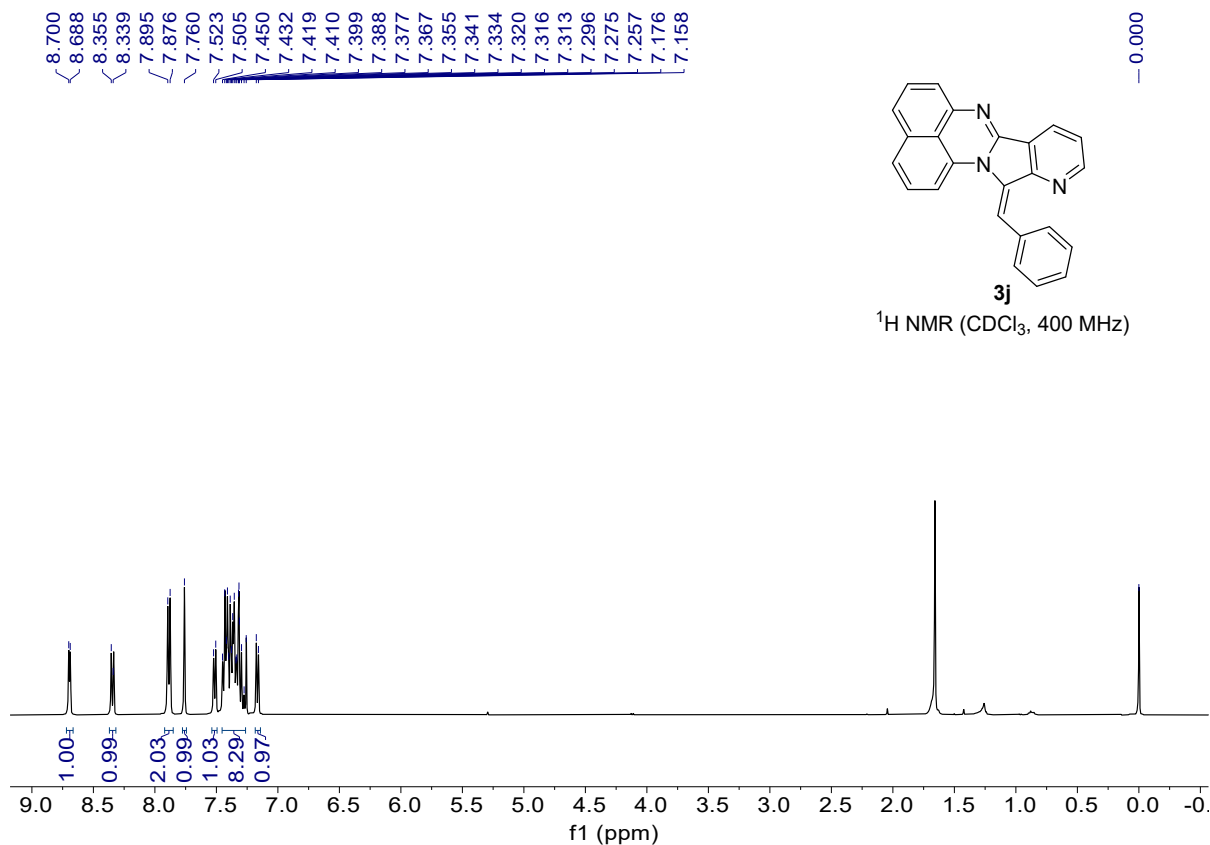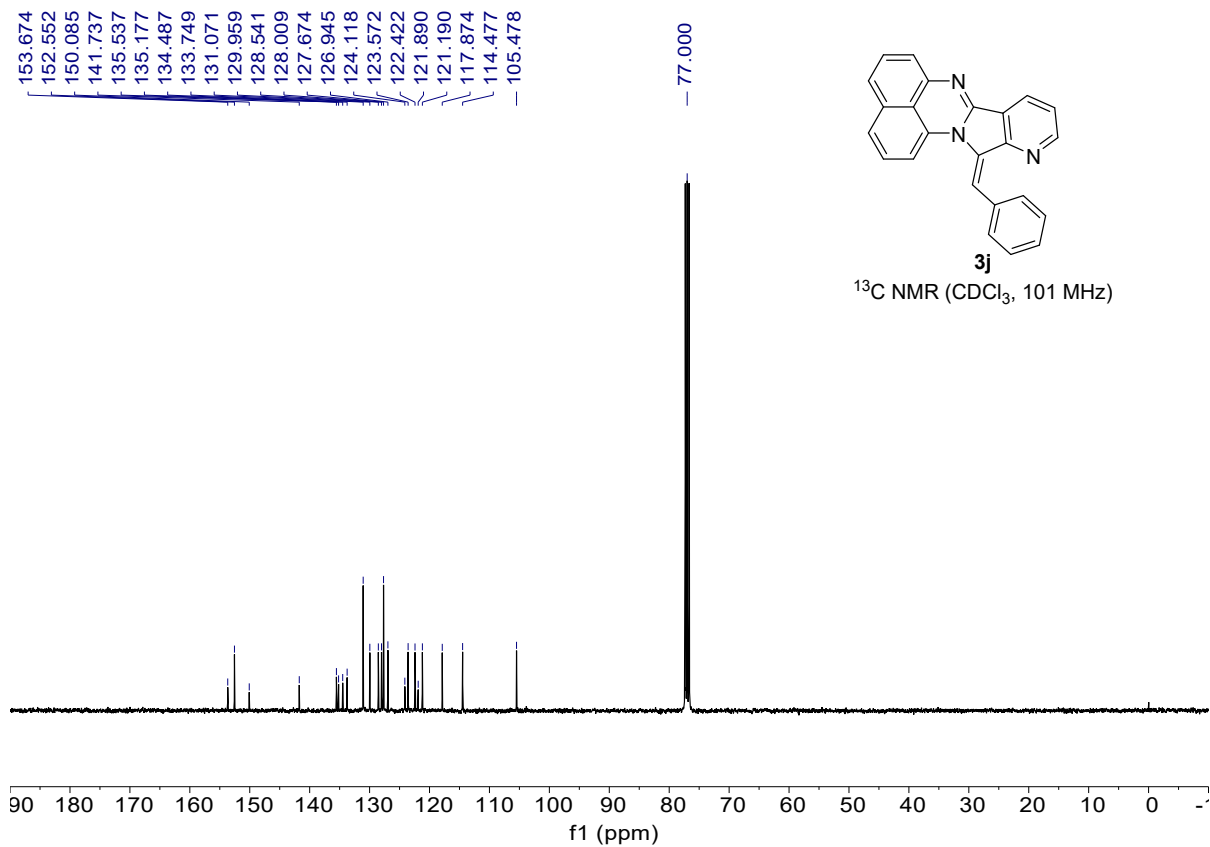

**(E)-12-(naphthalen-1-ylmethylene)-12H-isoindolo[2,1-a]perimidin (3k)**

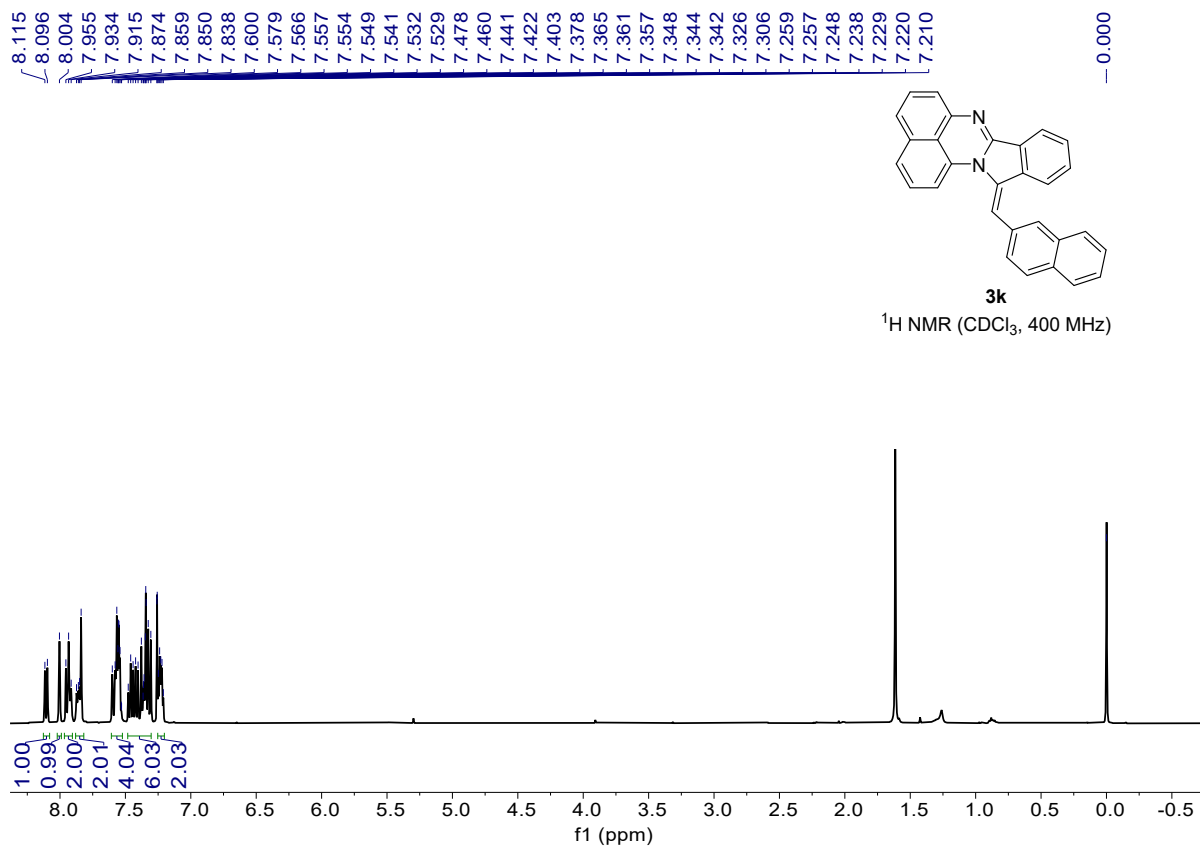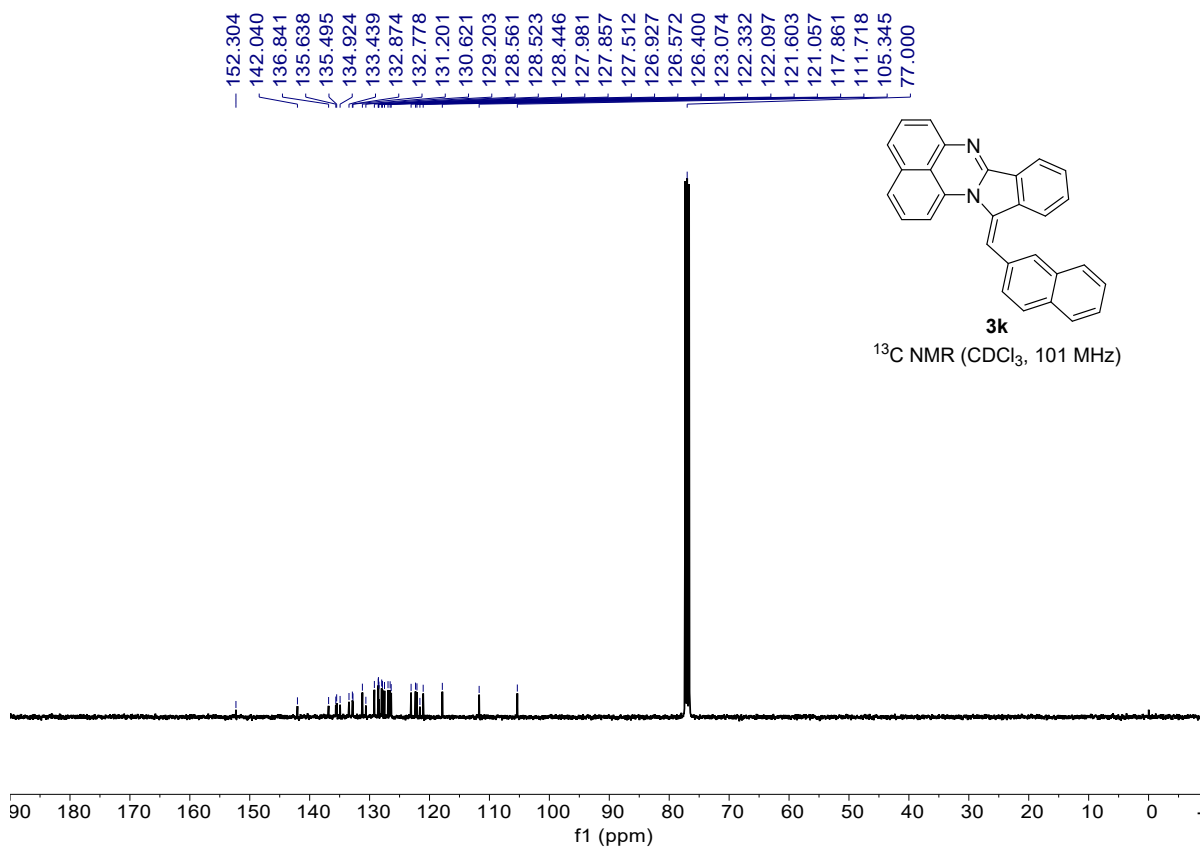



**(E)-12-(2-methoxybenzylidene)-12H-isoindolo[2,1-a]perimidine (31)**

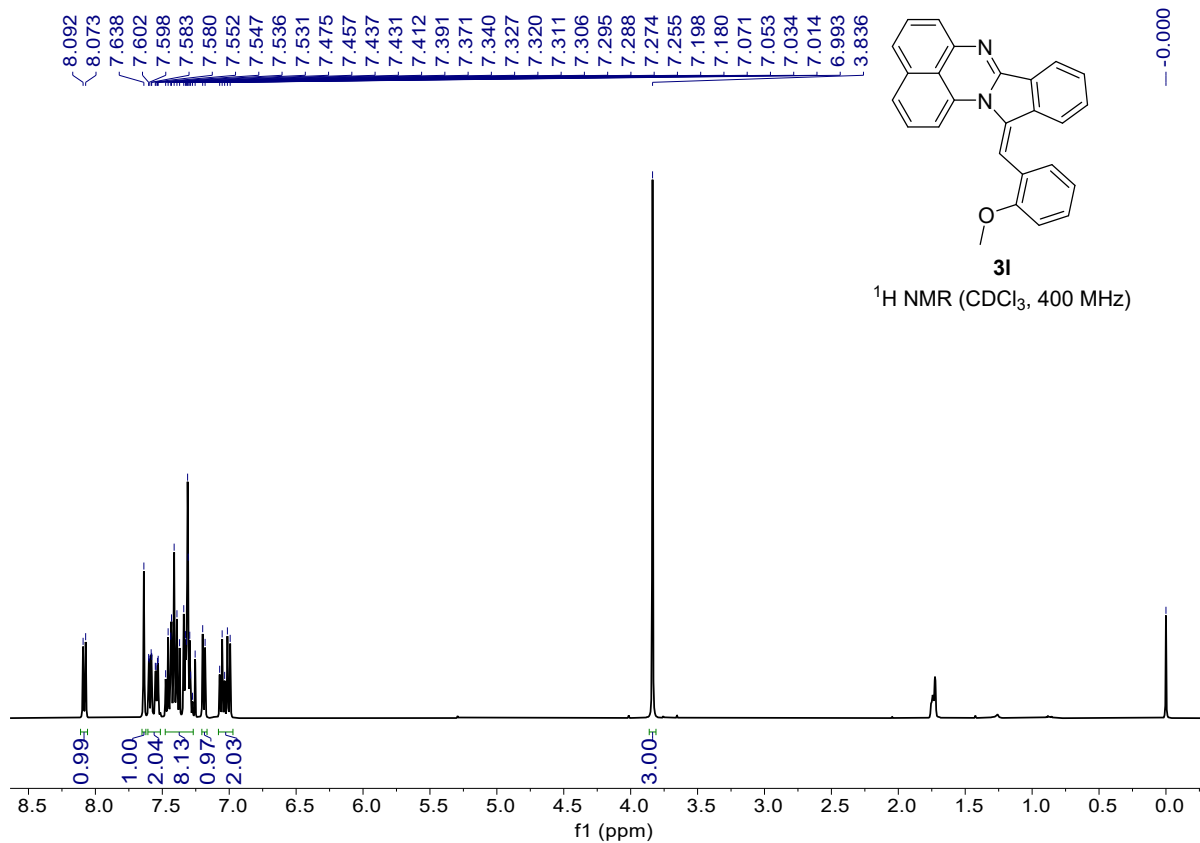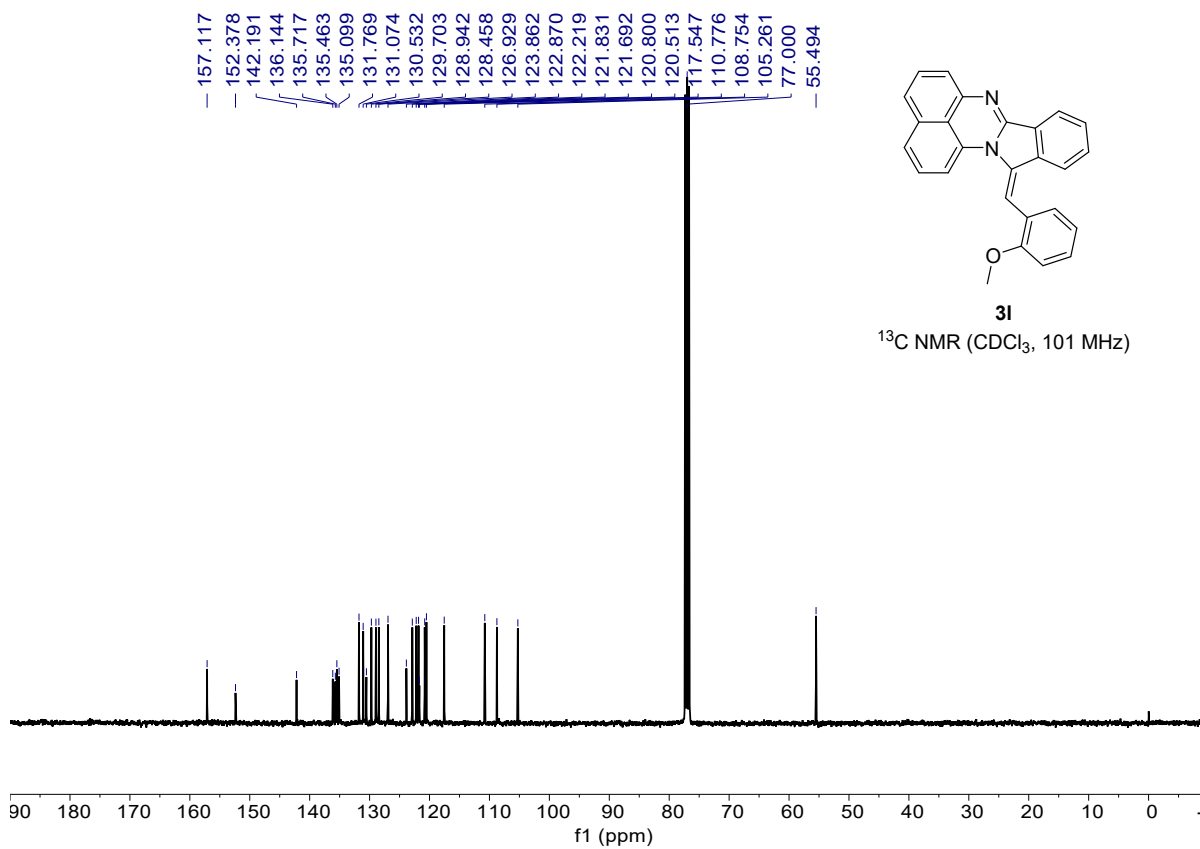

**(E)-12-(2-fluorobenzylidene)-12H-isoindolo[2,1-a]perimidine (3m)**

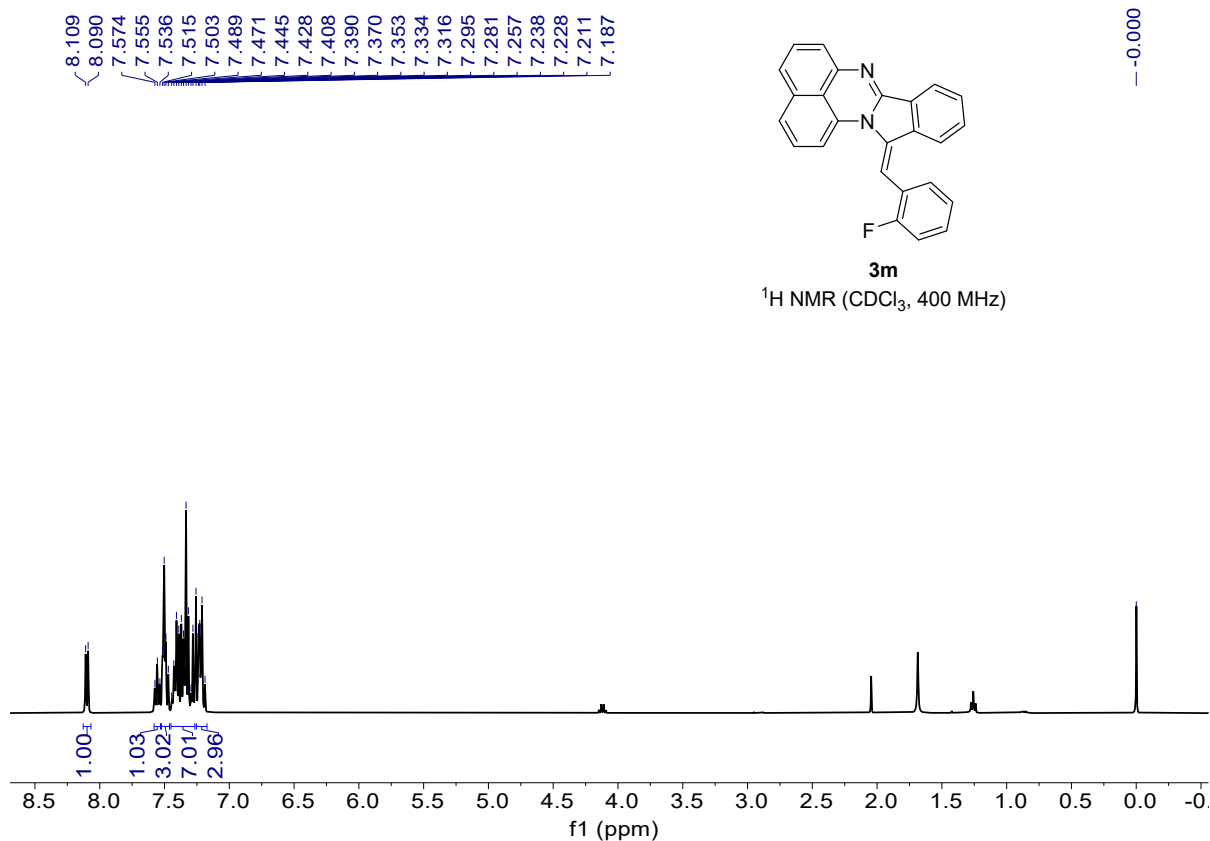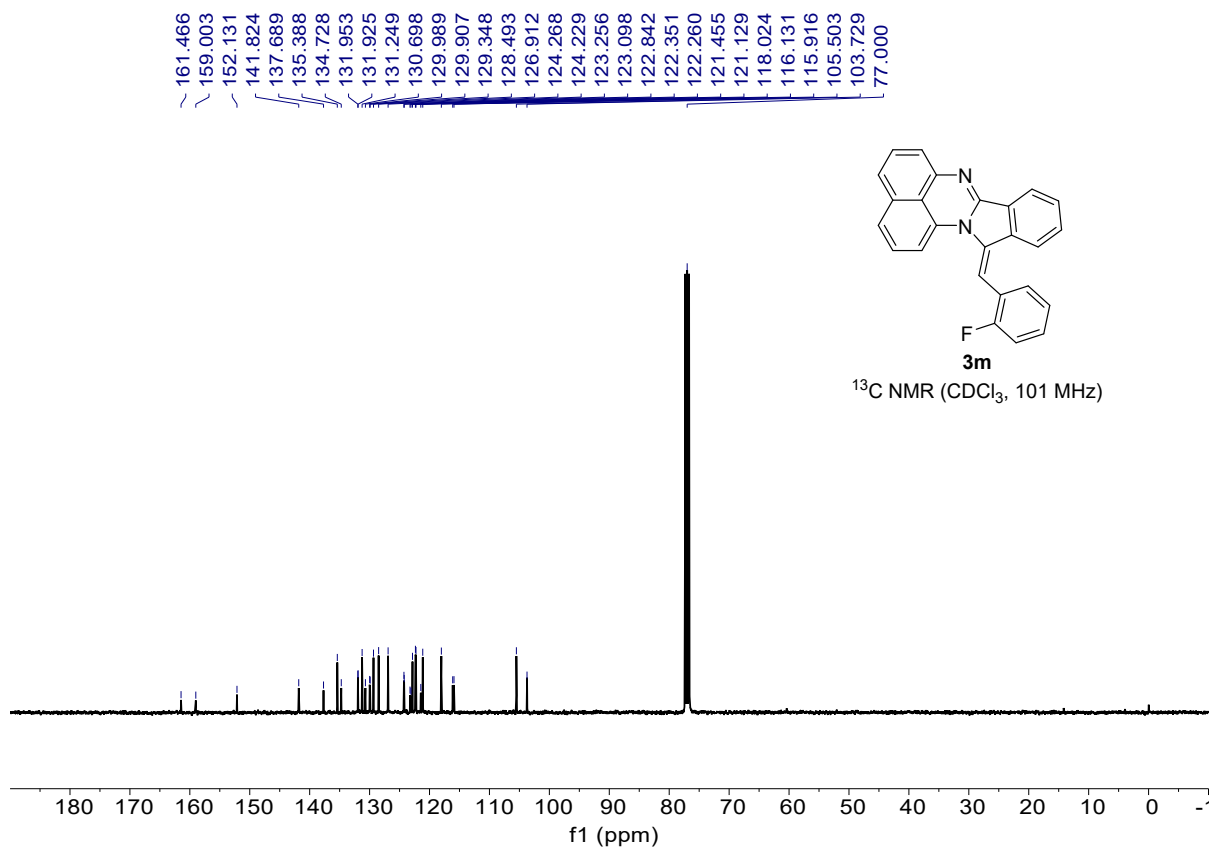

**(E)-12-(2-chlorobenzylidene)-12H-isoindolo[2,1-a]perimidine (3n)**

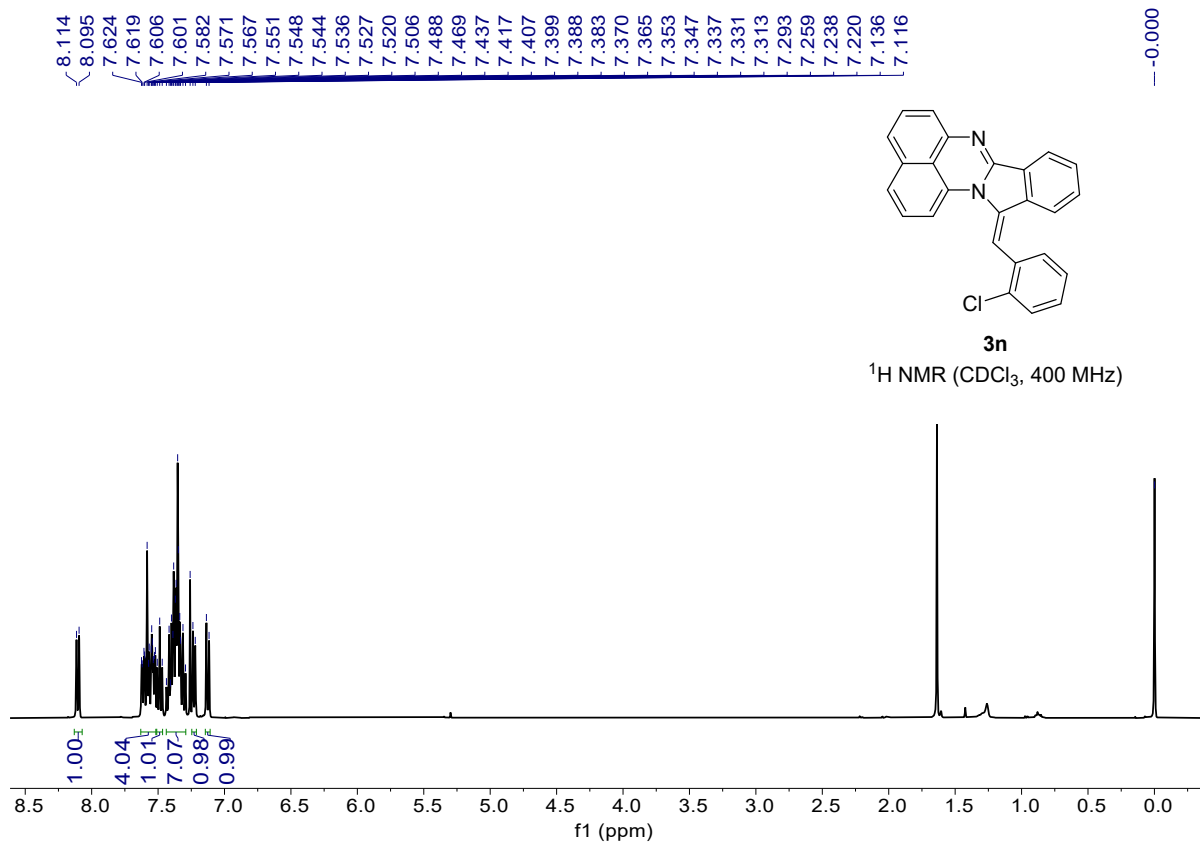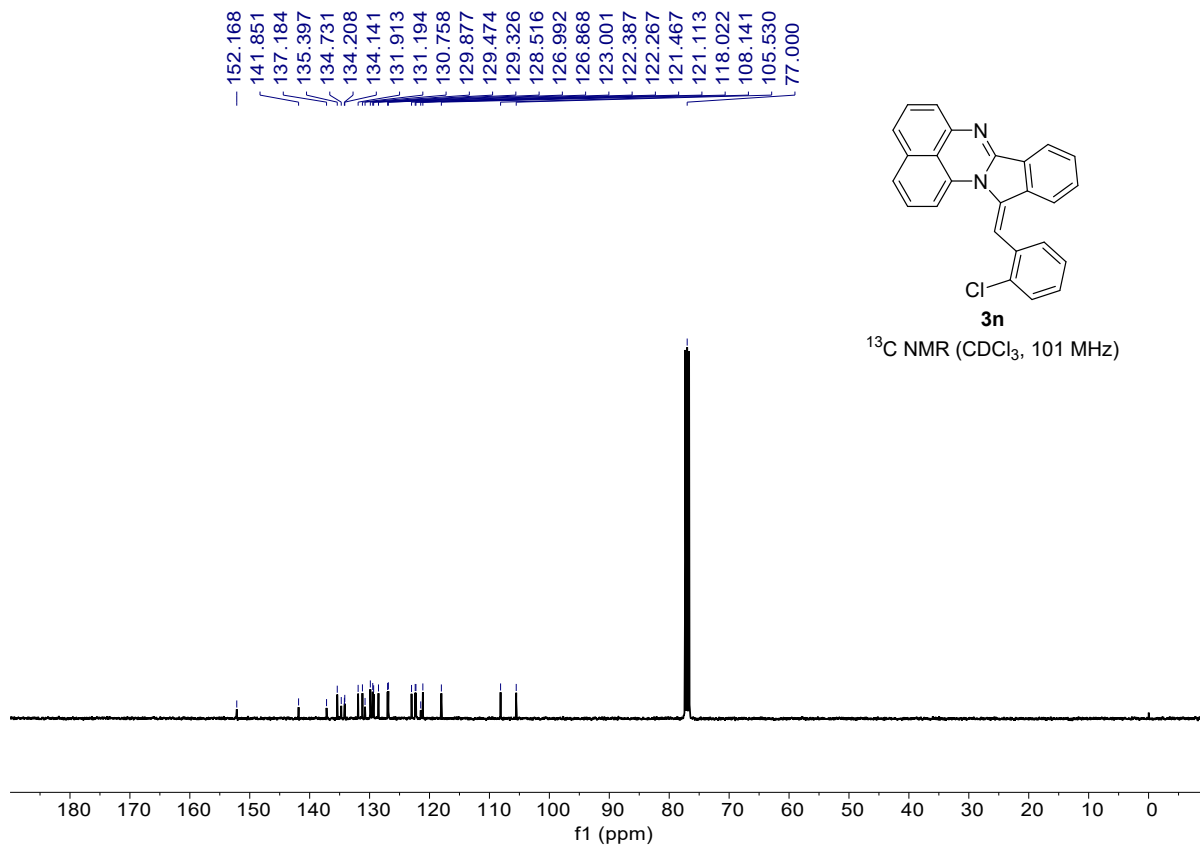

**(E)-12-(2-methylbenzylidene)-12H-isoindolo[2,1-a]perimidine (3o)**

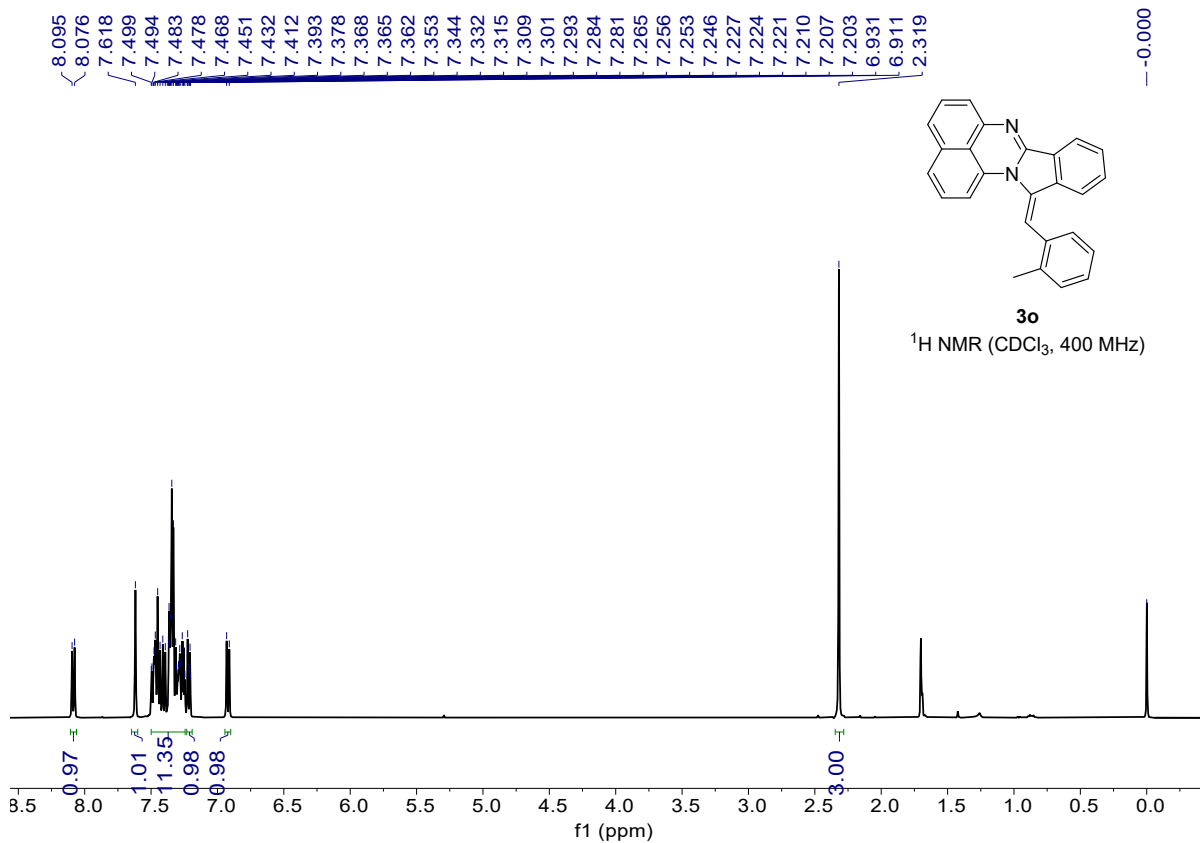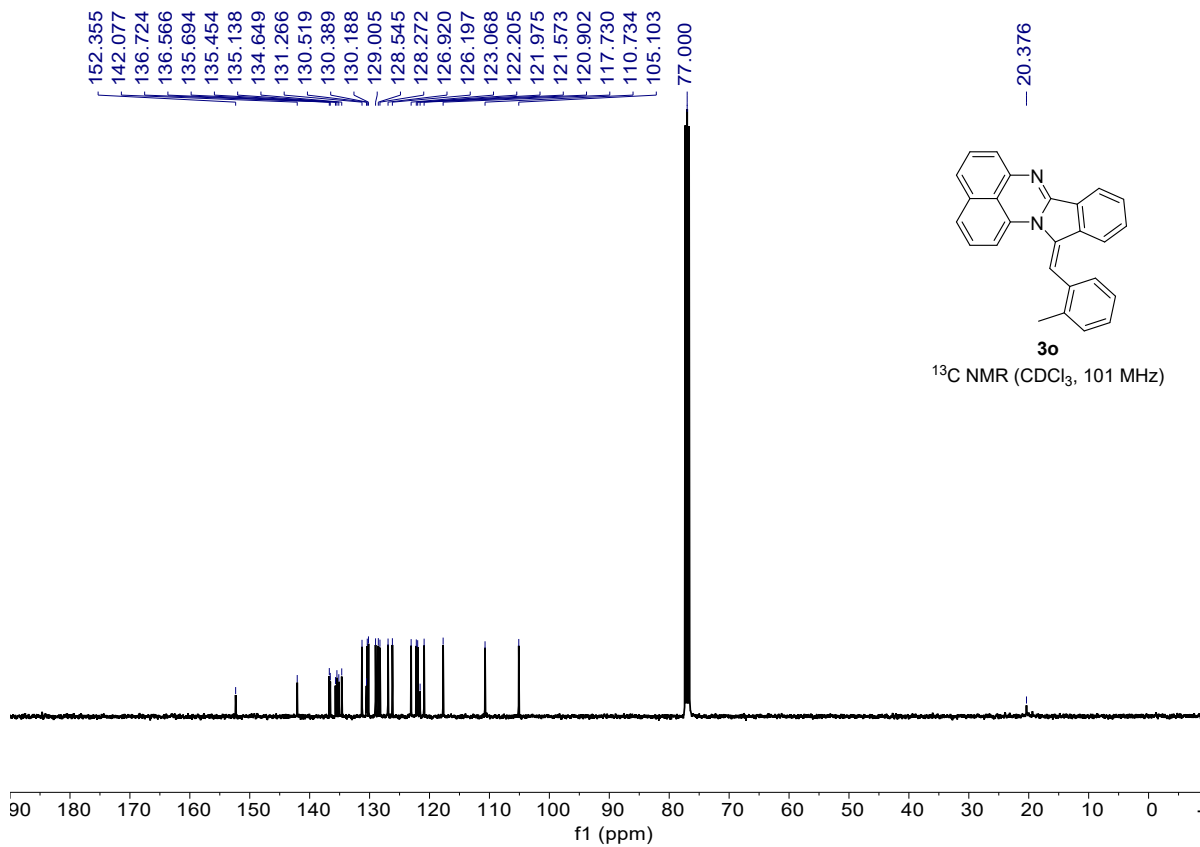

**(E)-12-(3-methoxybenzylidene)-12H-isoindolo[2,1-a]perimidine (3p)**

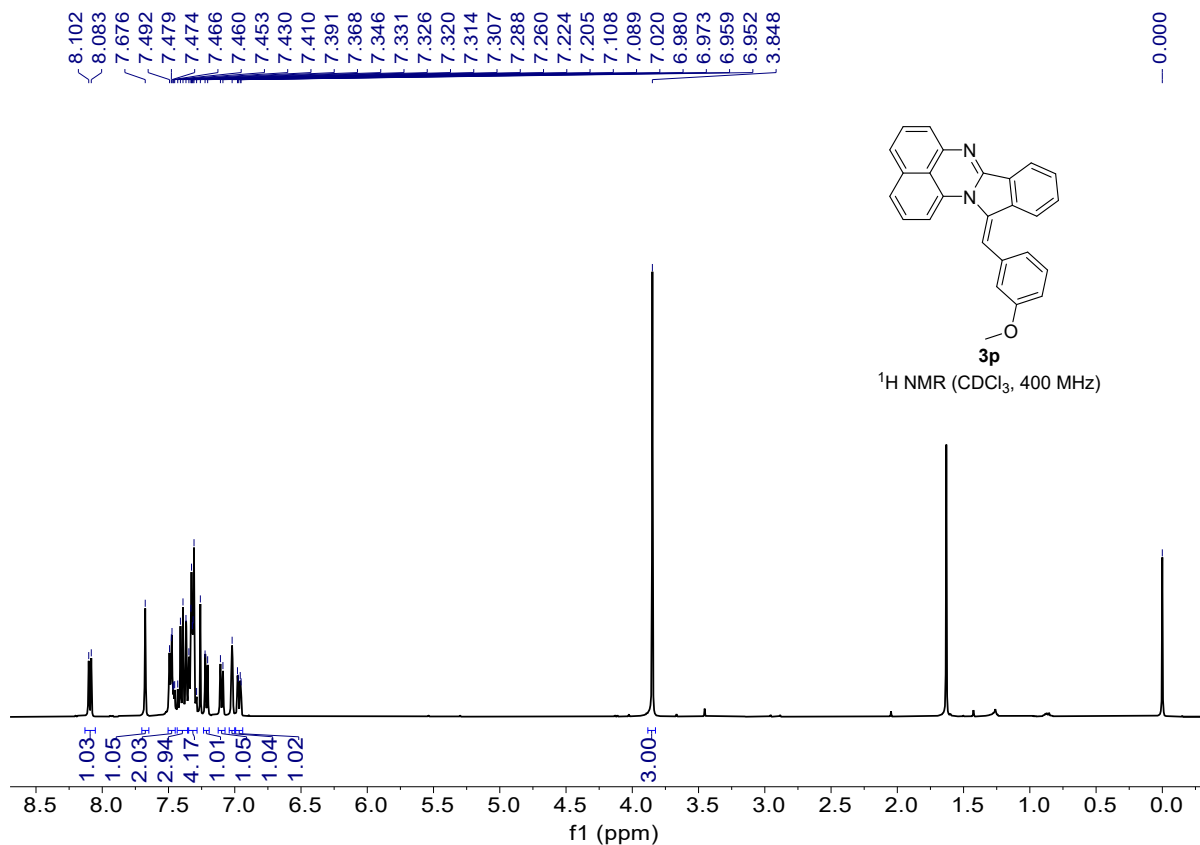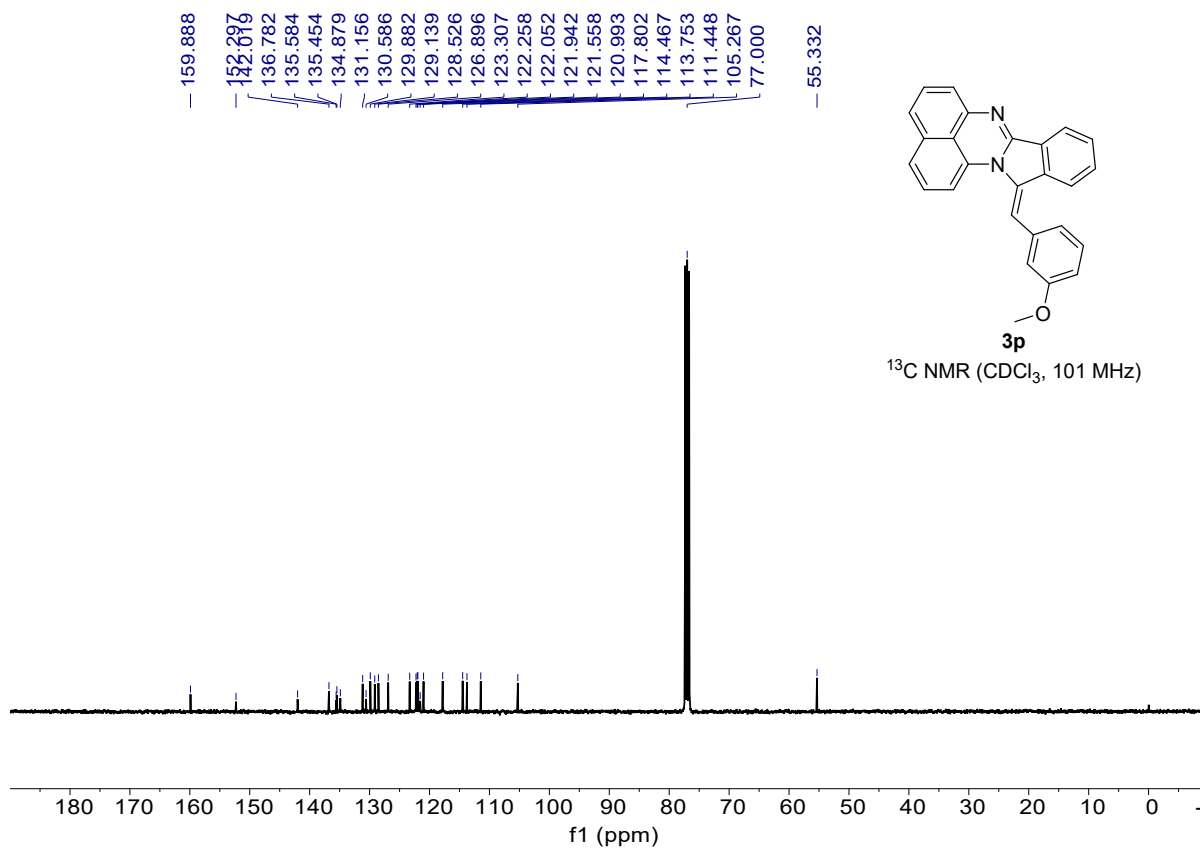

**(E)-12-(3-fluorobenzylidene)-12H-isoindolo[2,1-a]perimidine (3q)**

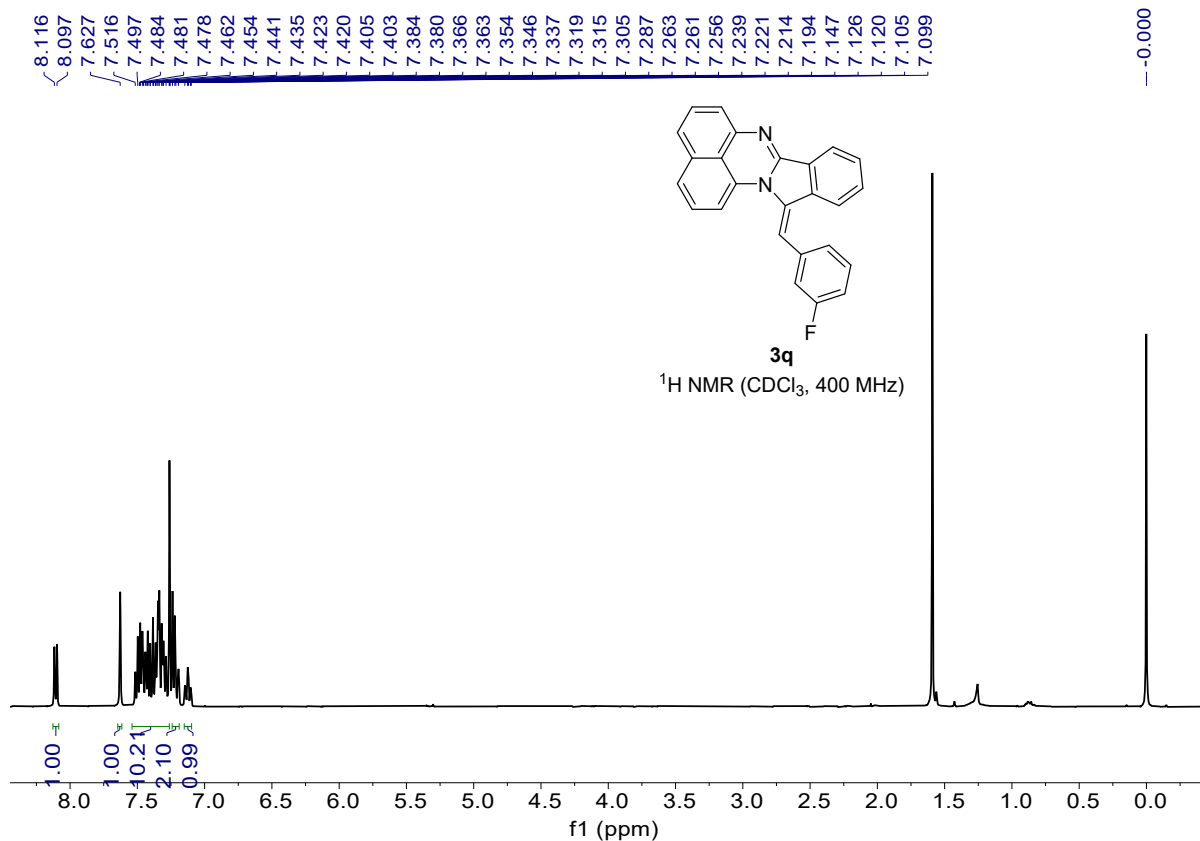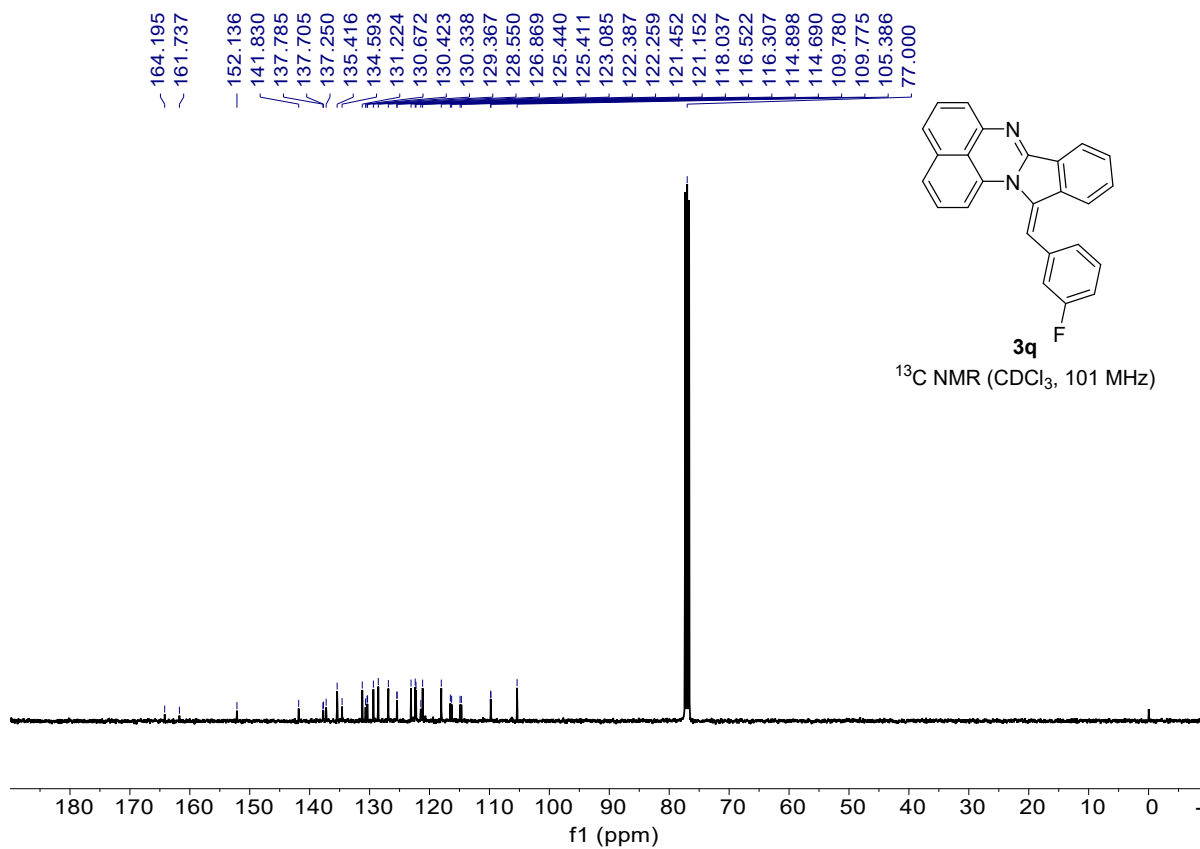

**(E)-12-(3-chlorobenzylidene)-12H-isoindolo[2,1-a]perimidine (3r)**

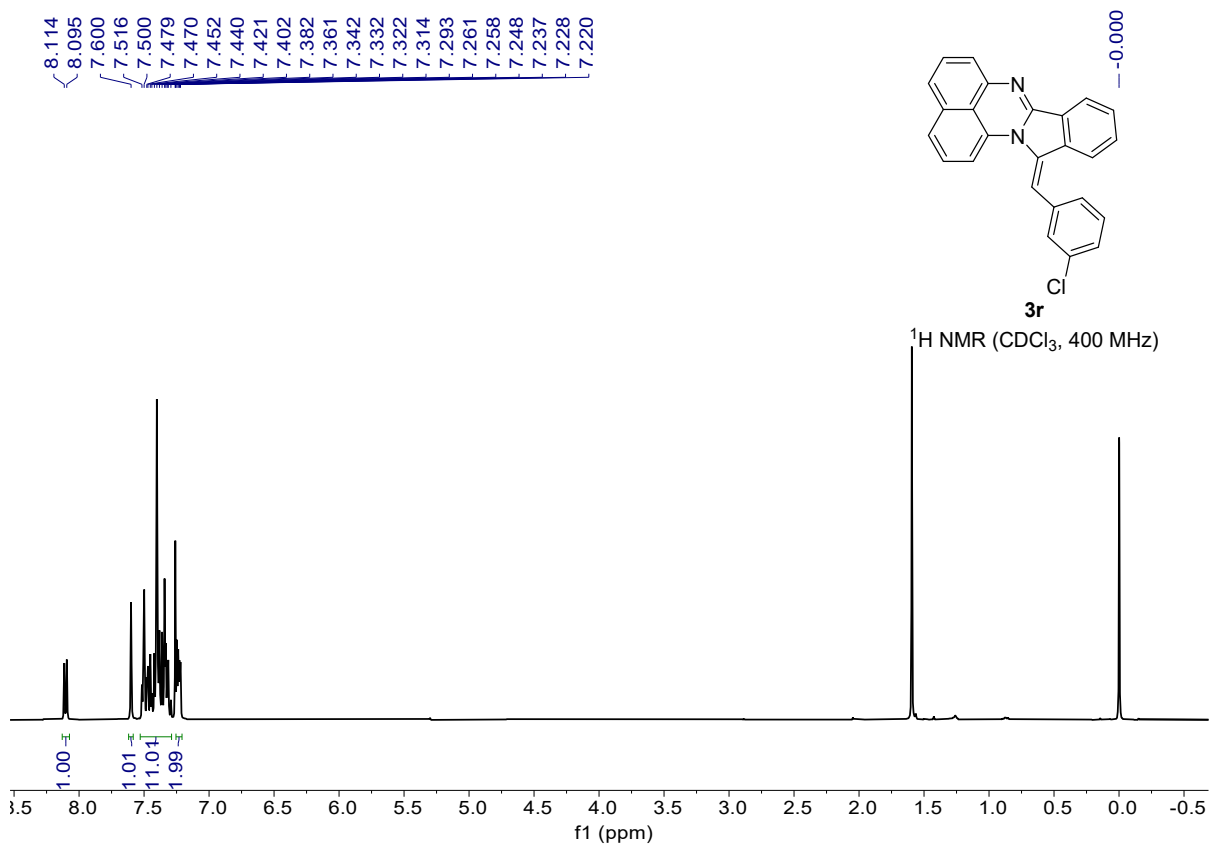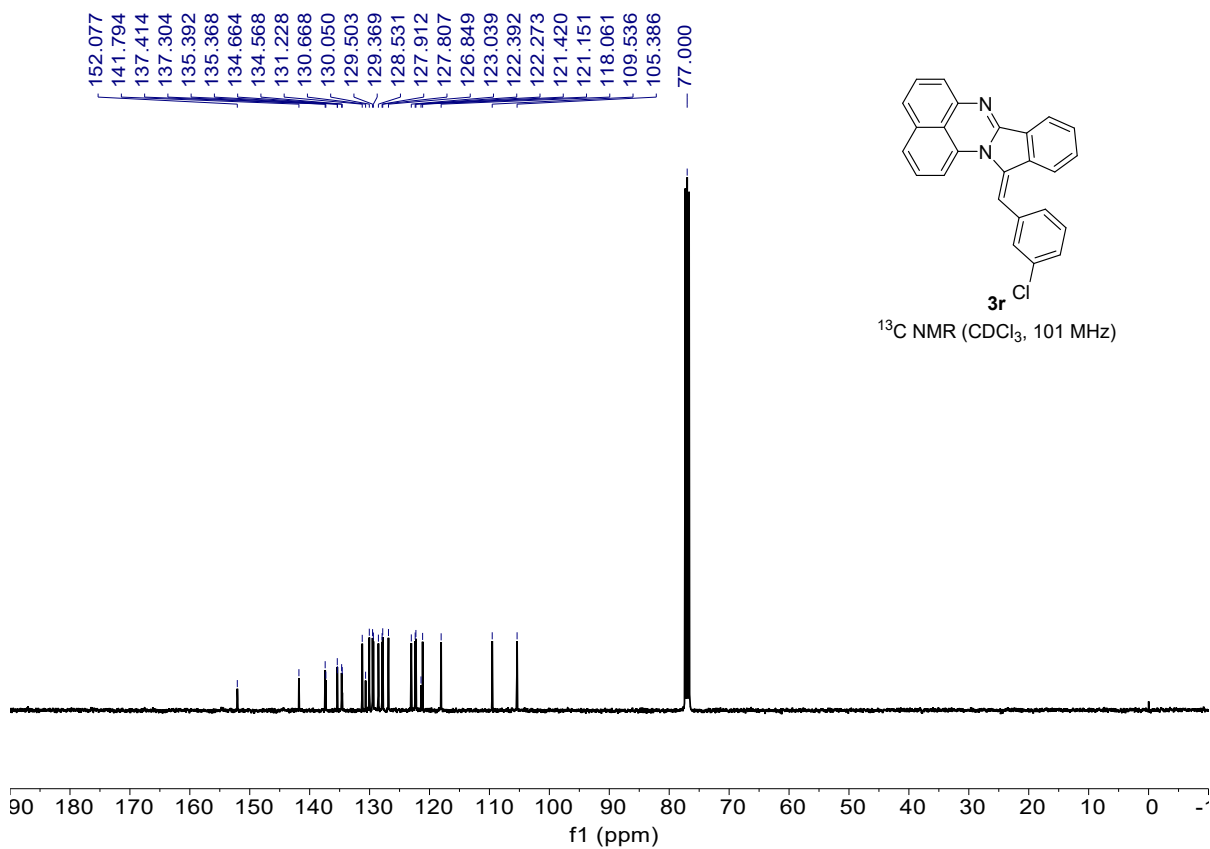

**(E)-12-(3-methylbenzylidene)-12H-isoindolo[2,1-a]perimidine (3s)**

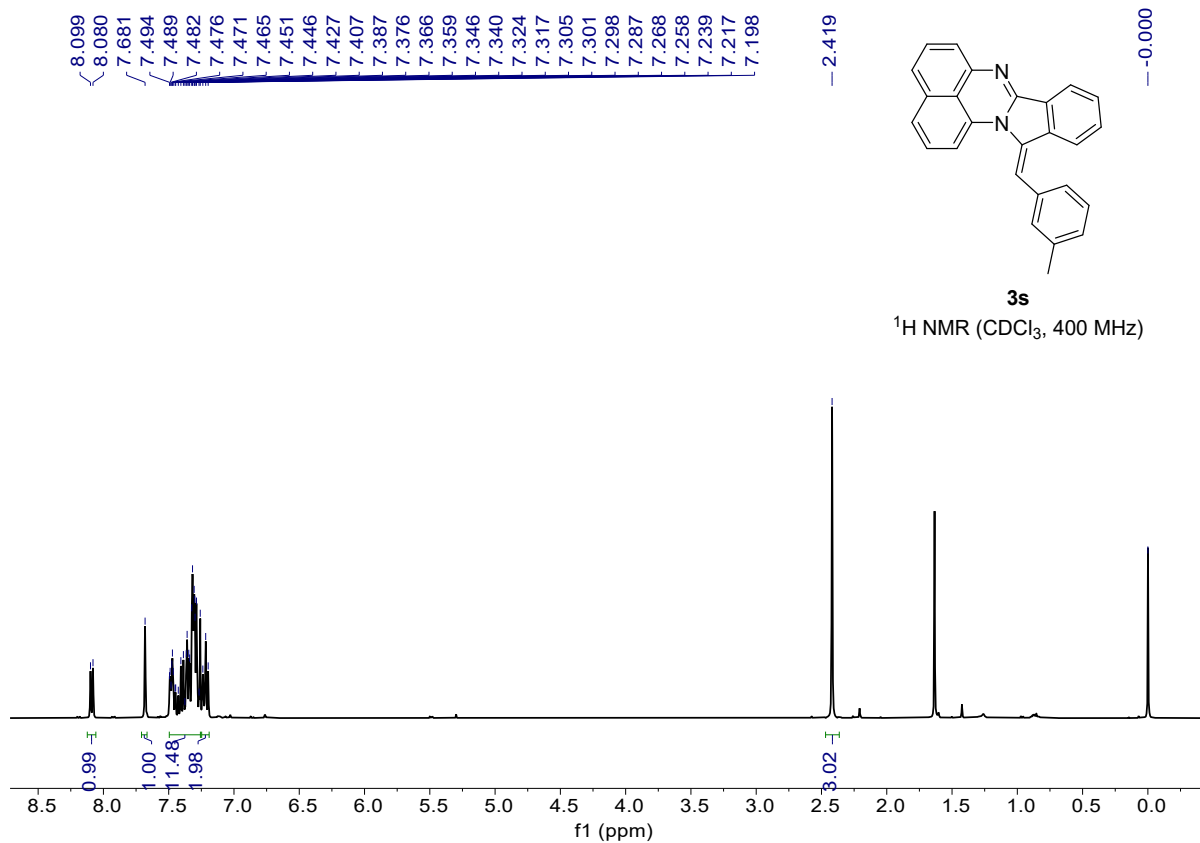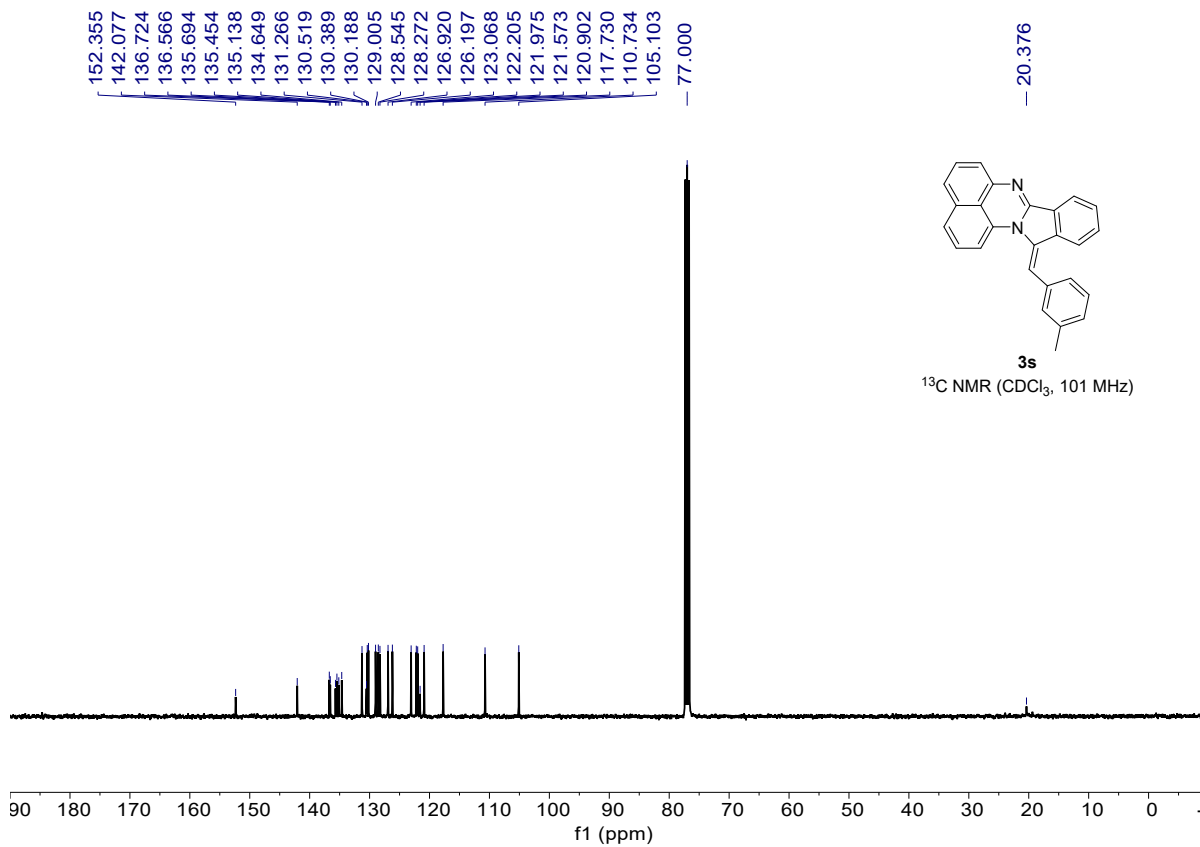



**(E)-12-(3-nitrobenzylidene)-12H-isoindolo[2,1-a]perimidine (3t)**

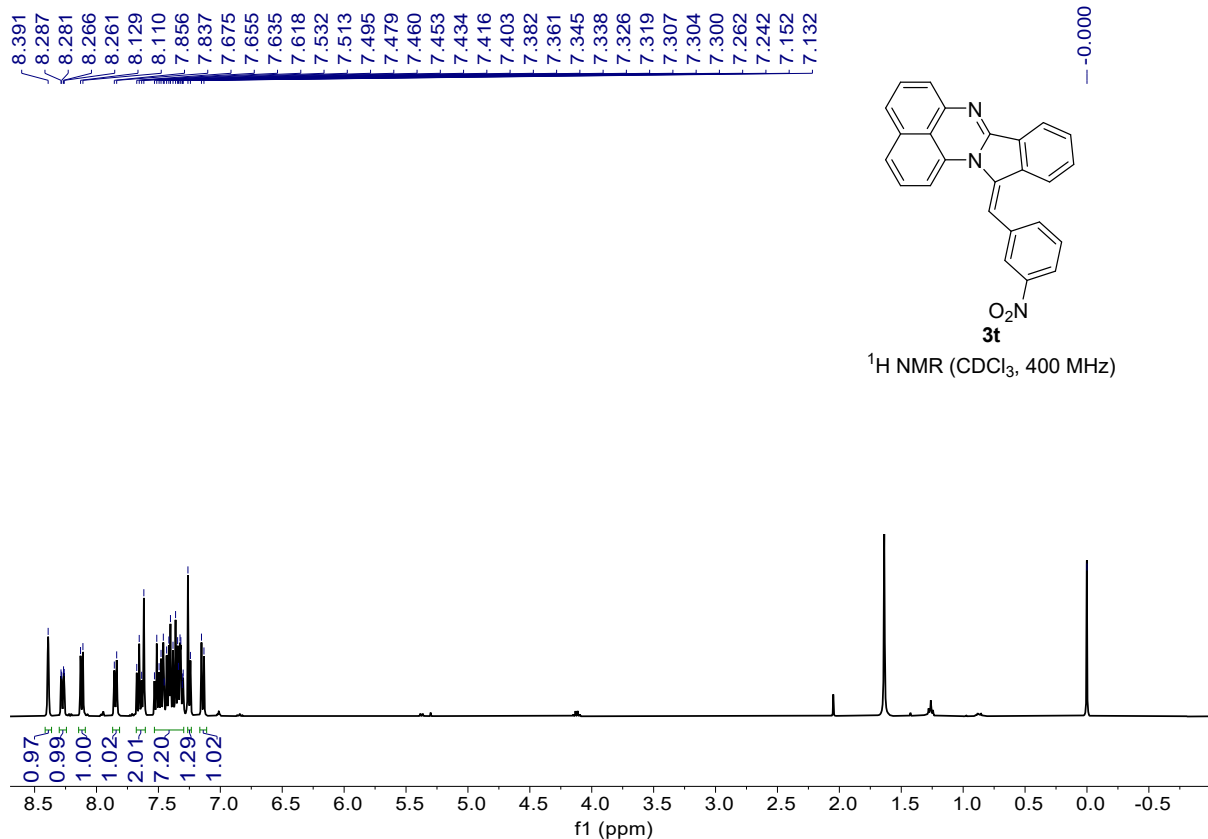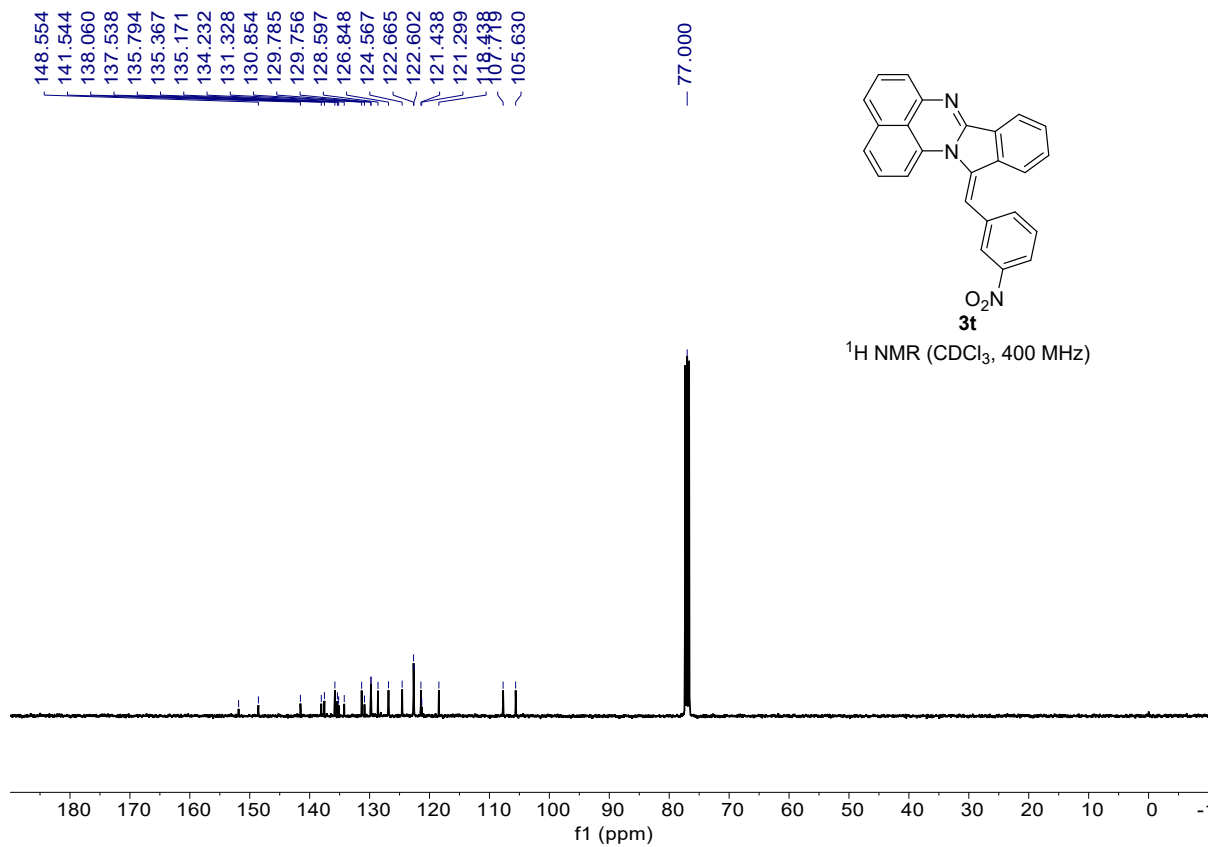

**(E)-12-(4-bromobenzylidene)-12H-isoindolo[2,1-a]perimidine (3u)**

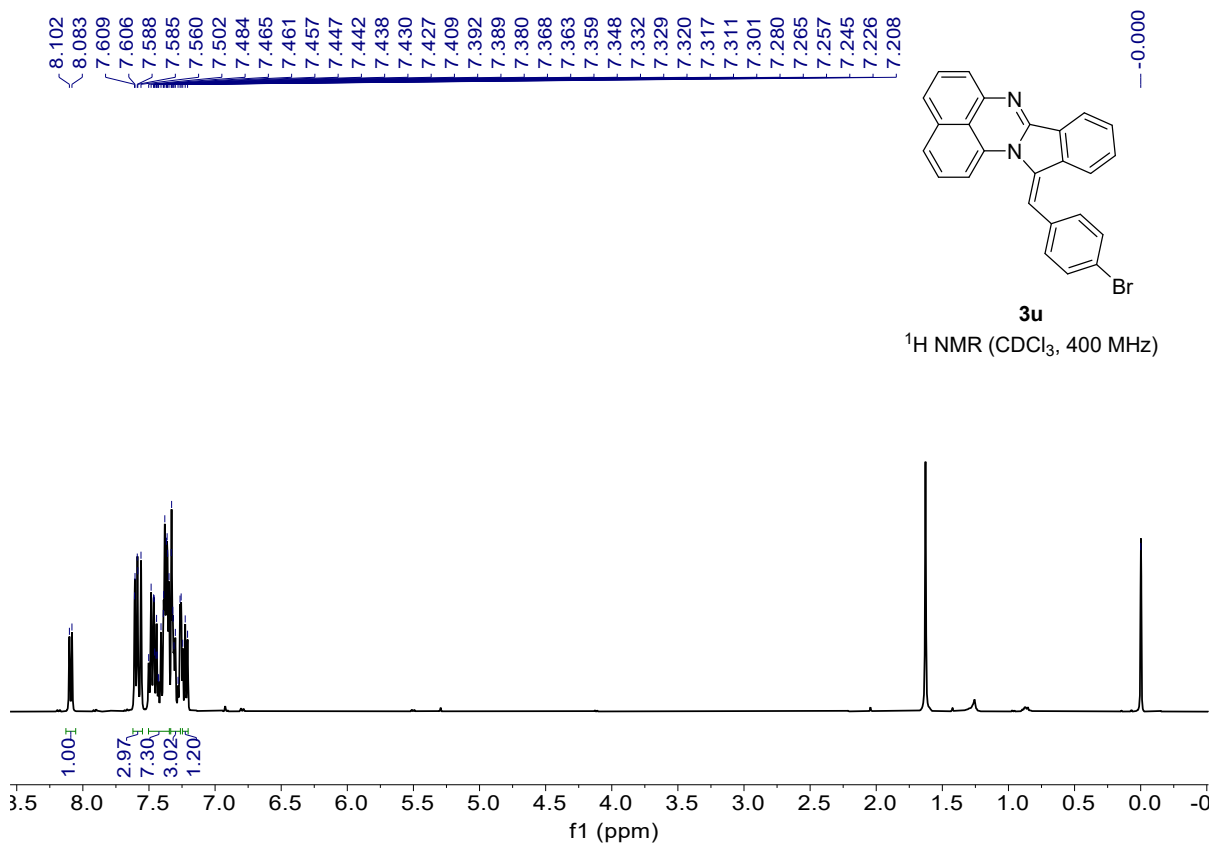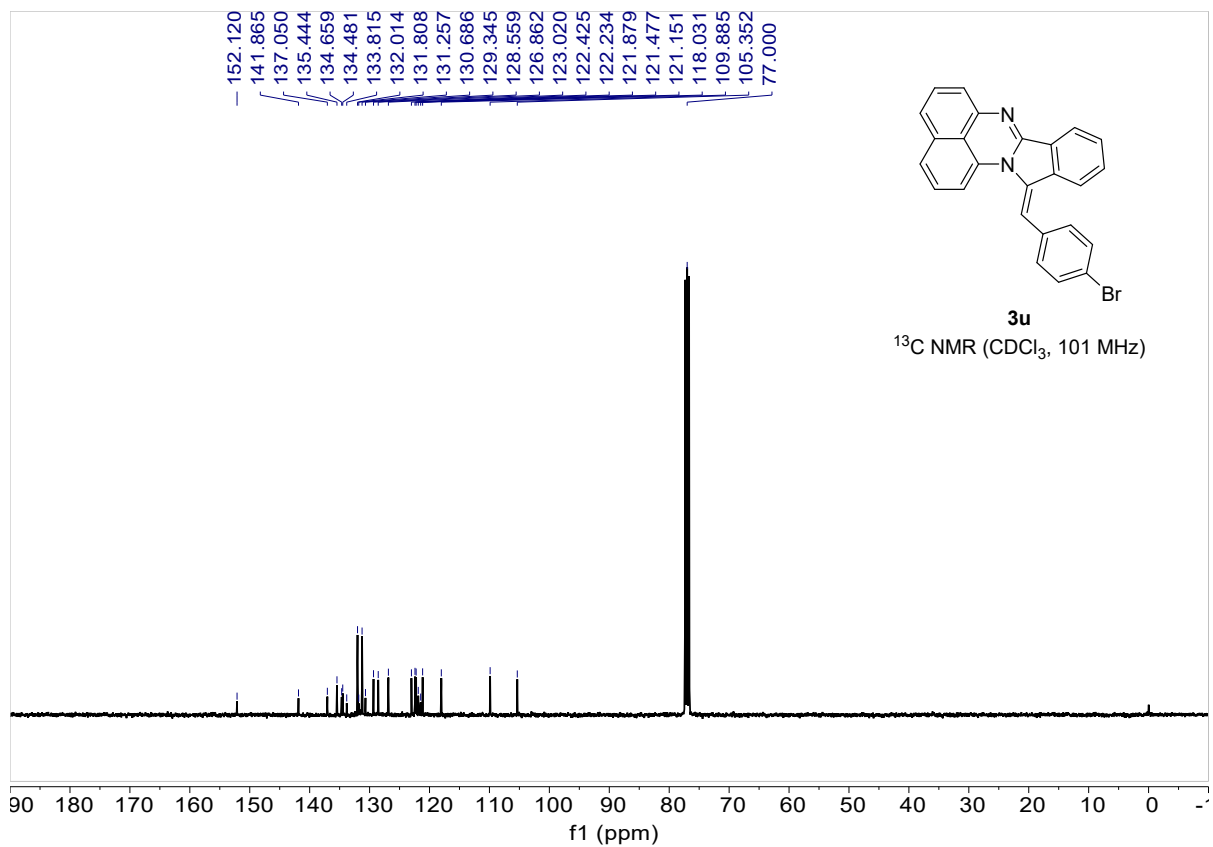

**(E)-12-(4-chlorobenzylidene)-12H-isoindolo[2,1-a]perimidine (3v)**

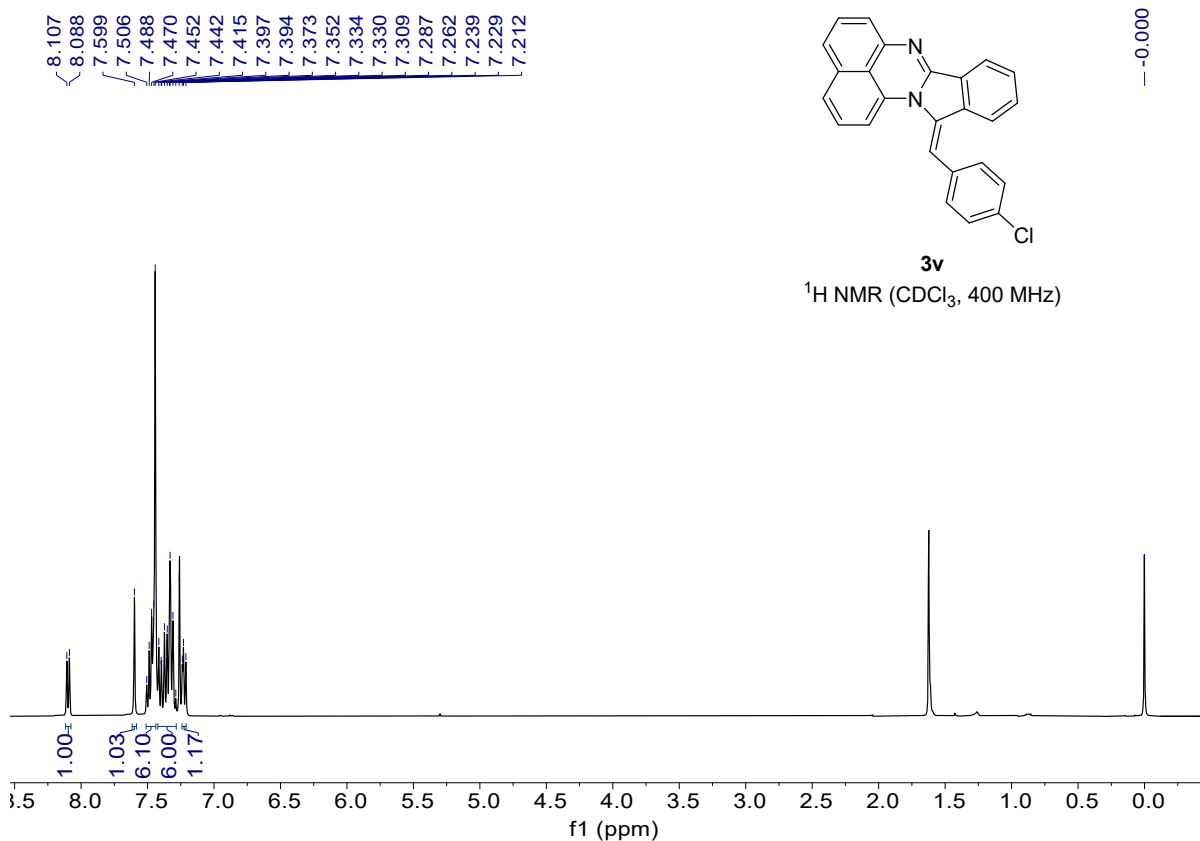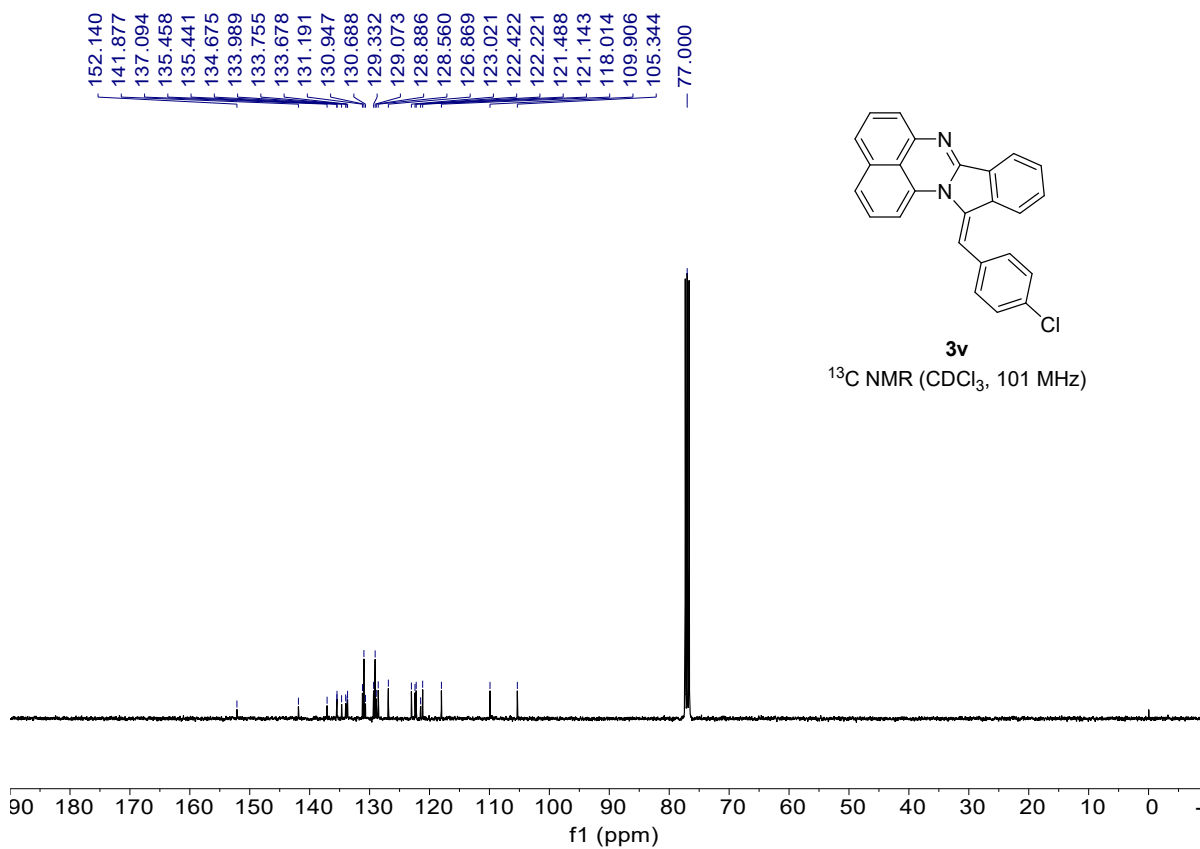

**(E)-9-benzylidene-1-methyl-3-propyl-1,9-dihydro-11H-pyrazolo[4',3':4,5]pyrimido[2,1-a]isoindol-11-one (5a)**

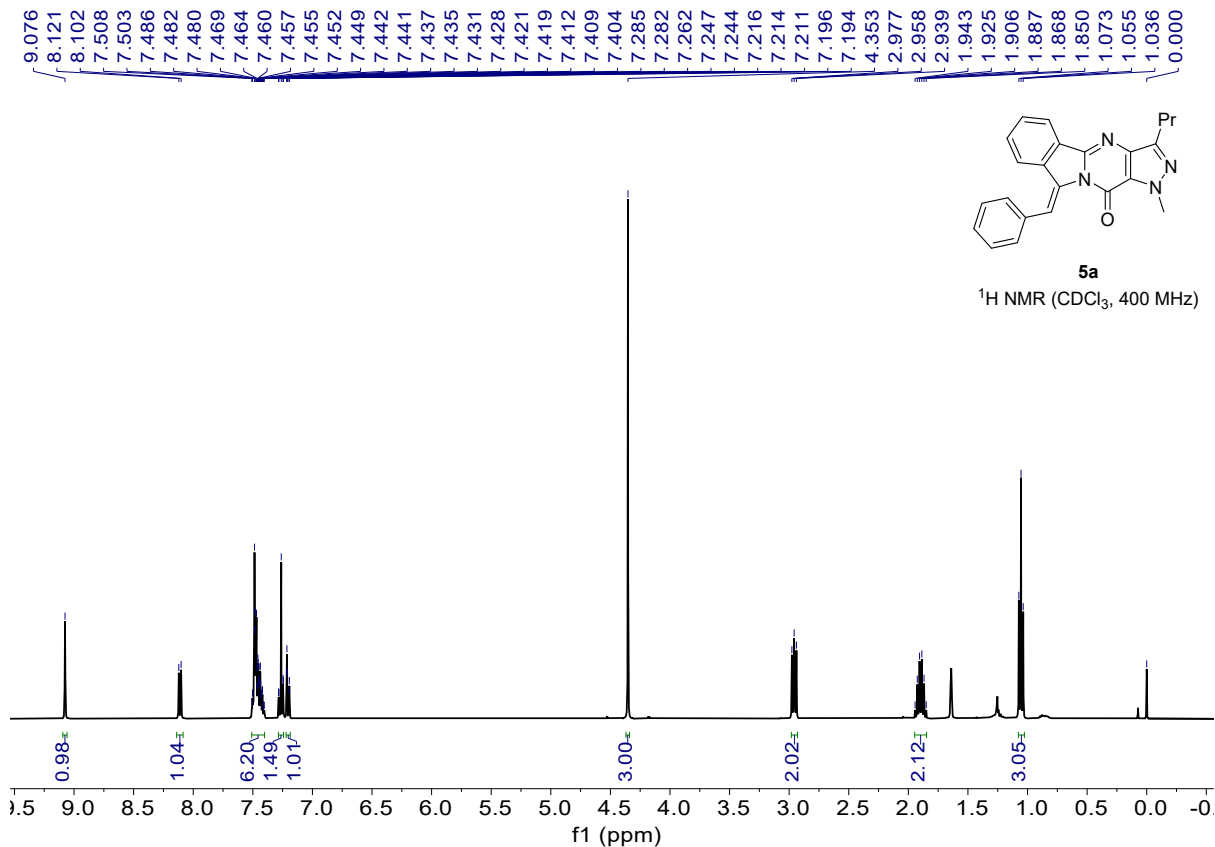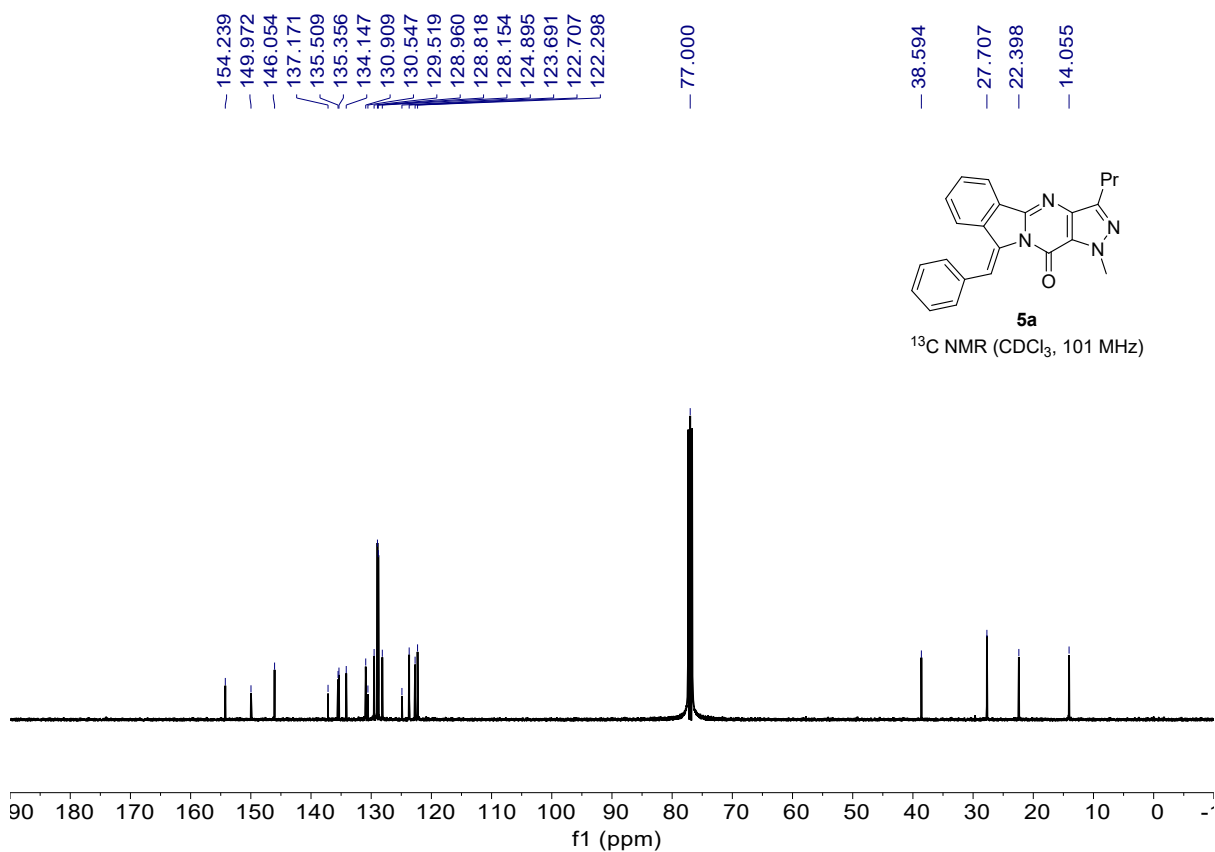

**(E)-9-benzylidene-7-fluoro-1-methyl-3-propyl-1,9-dihydro-11H-pyrazolo[4',3':4,5]pyrimido[2,1-a]isoindol-11-one (5b)**

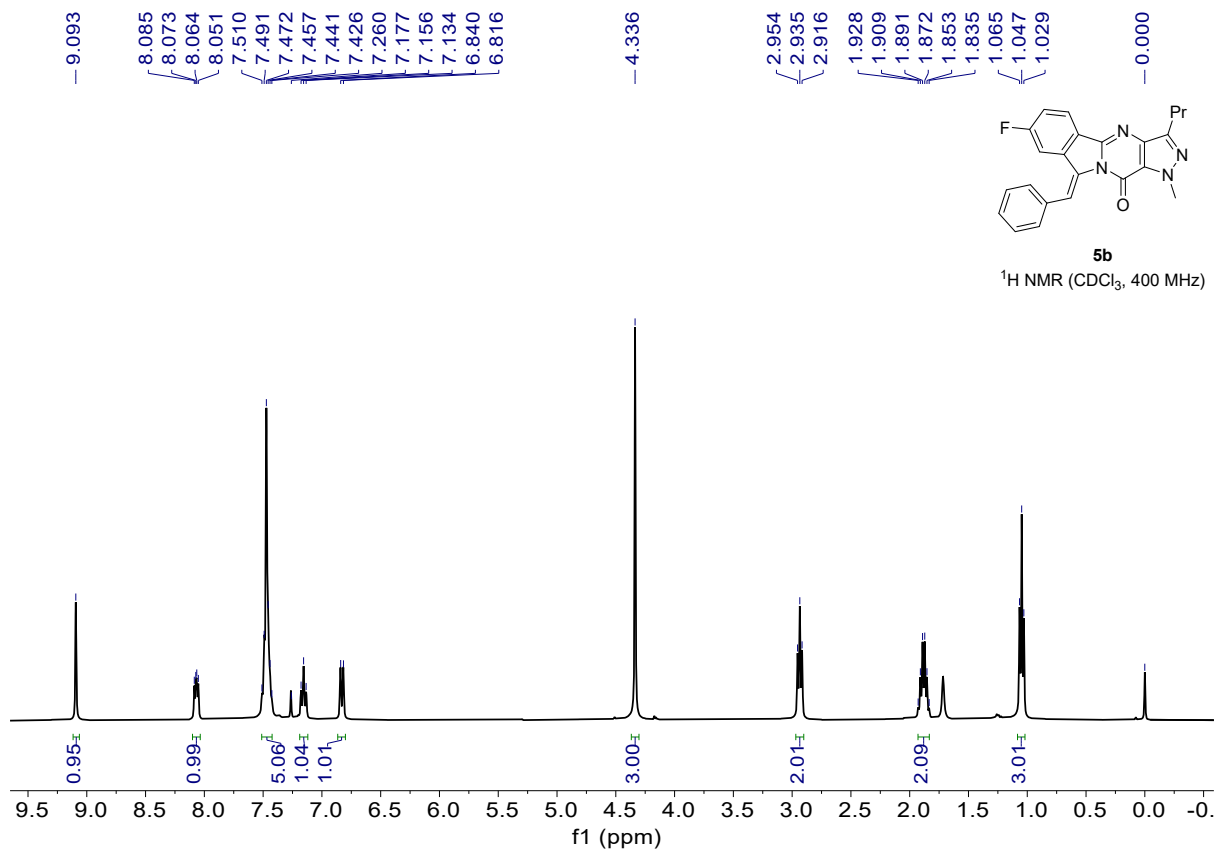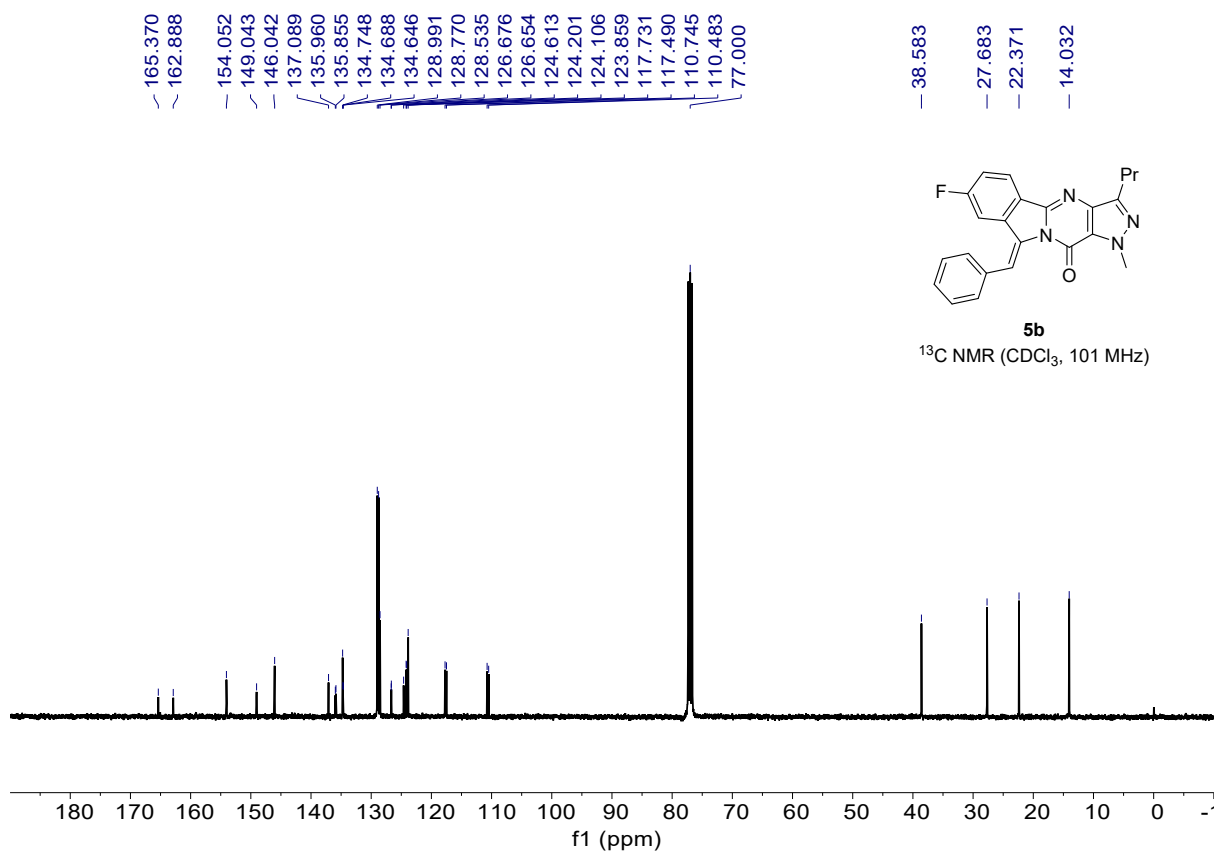

**(E)-9-benzylidene-7-chloro-1-methyl-3-propyl-1,9-dihydro-11H-pyrazolo[4',3':4,5]pyrimido[2,1-a]isoindol-11-one (5c)**

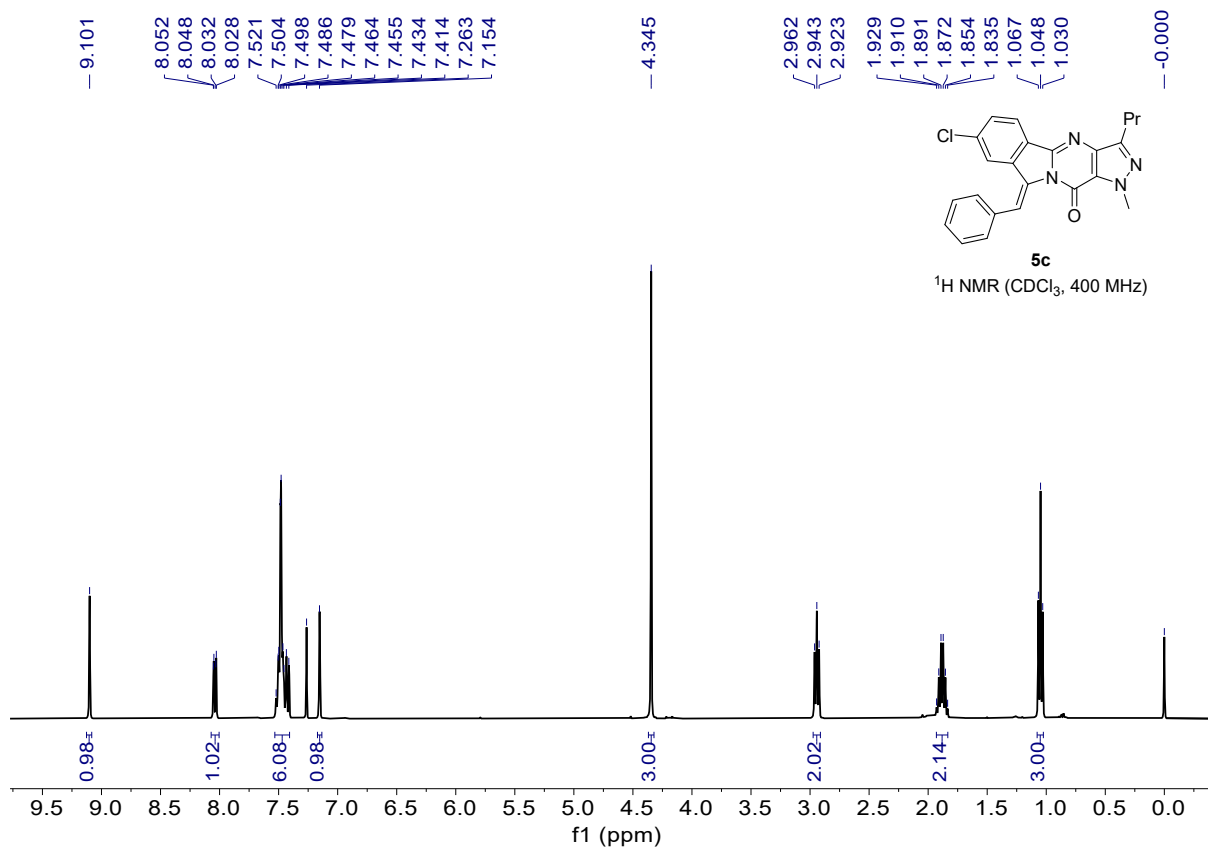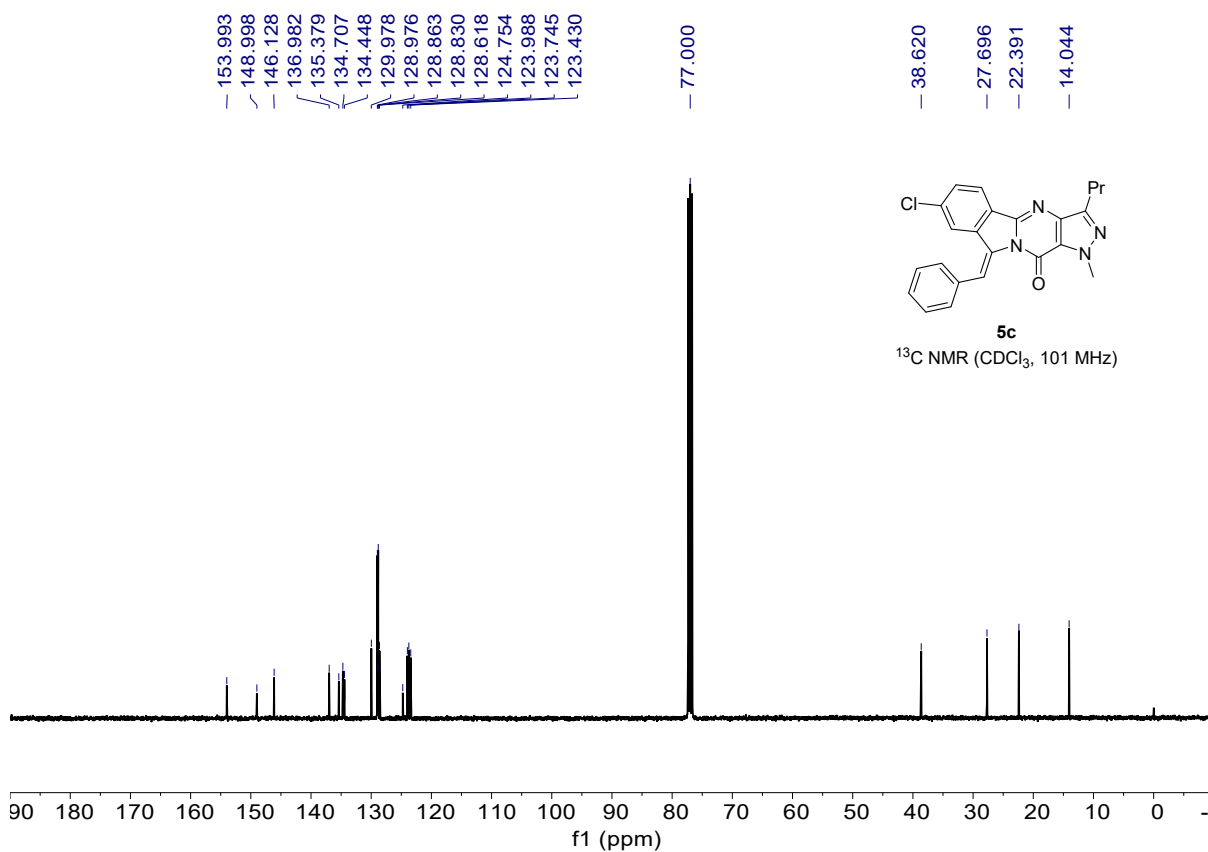

**(E)-9-benzylidene-1,7-dimethyl-3-propyl-1,9-dihydro-11H-pyrazolo[4',3':4,5]pyrimido[2,1-a]isoindol-11-one (5d)**

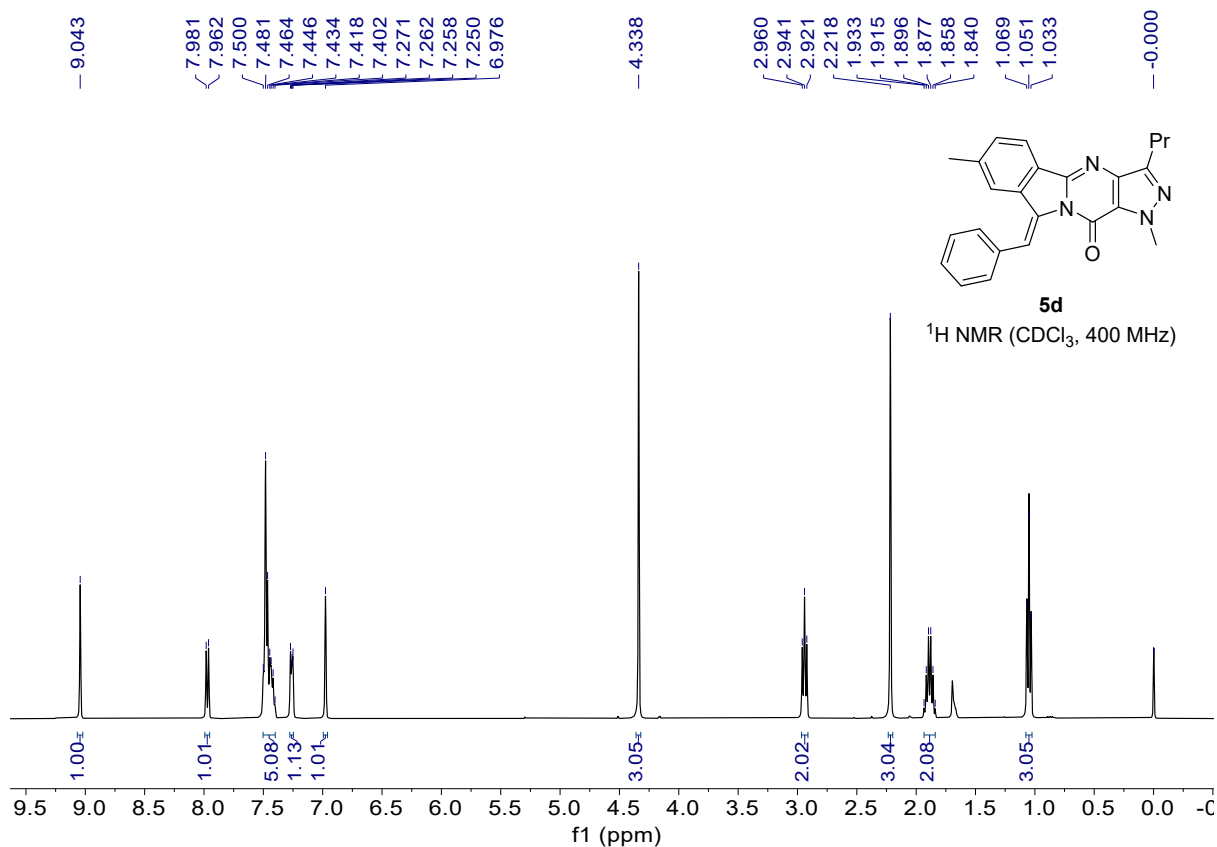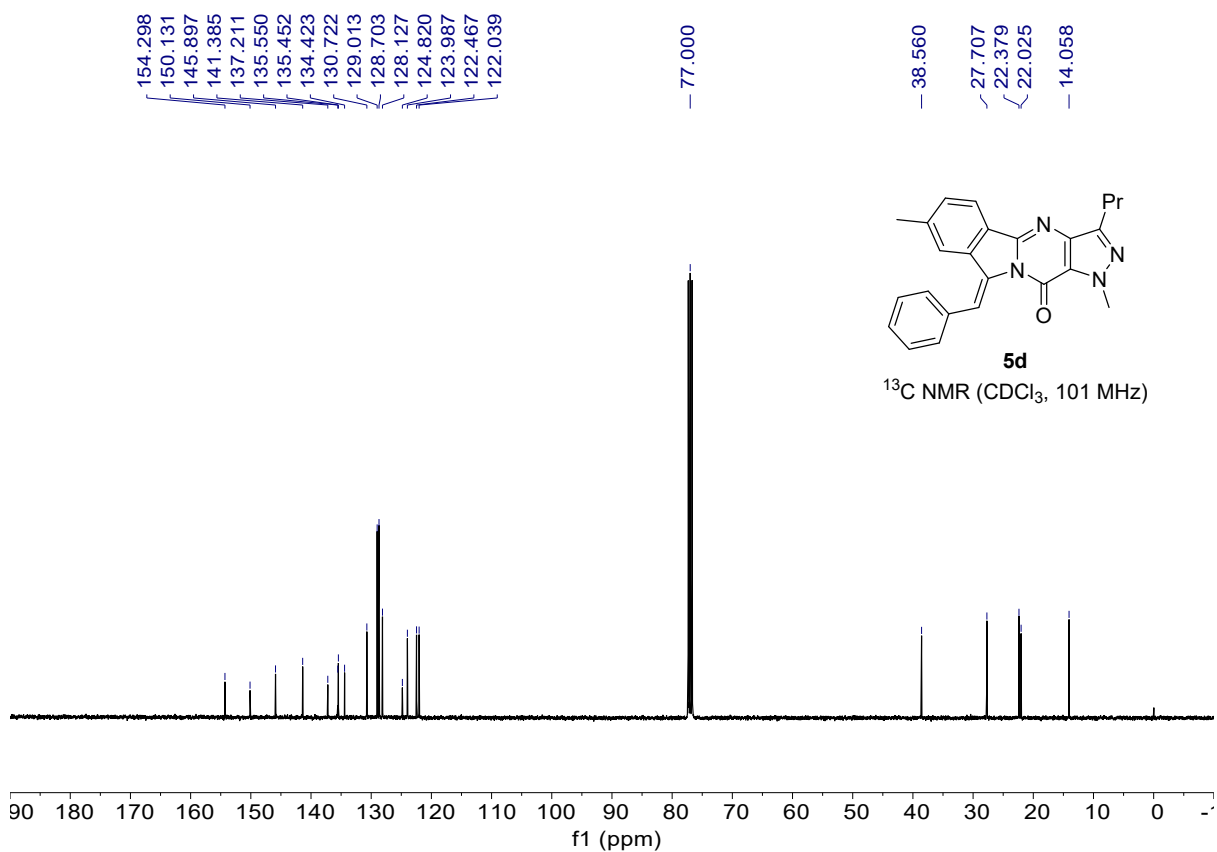

**(E)-9-benzylidene-6-fluoro-1-methyl-3-propyl-1,9-dihydro-11H-pyrazolo[4',3':4,5]pyrimido[2,1-a]isoindol-11-one (5e)**

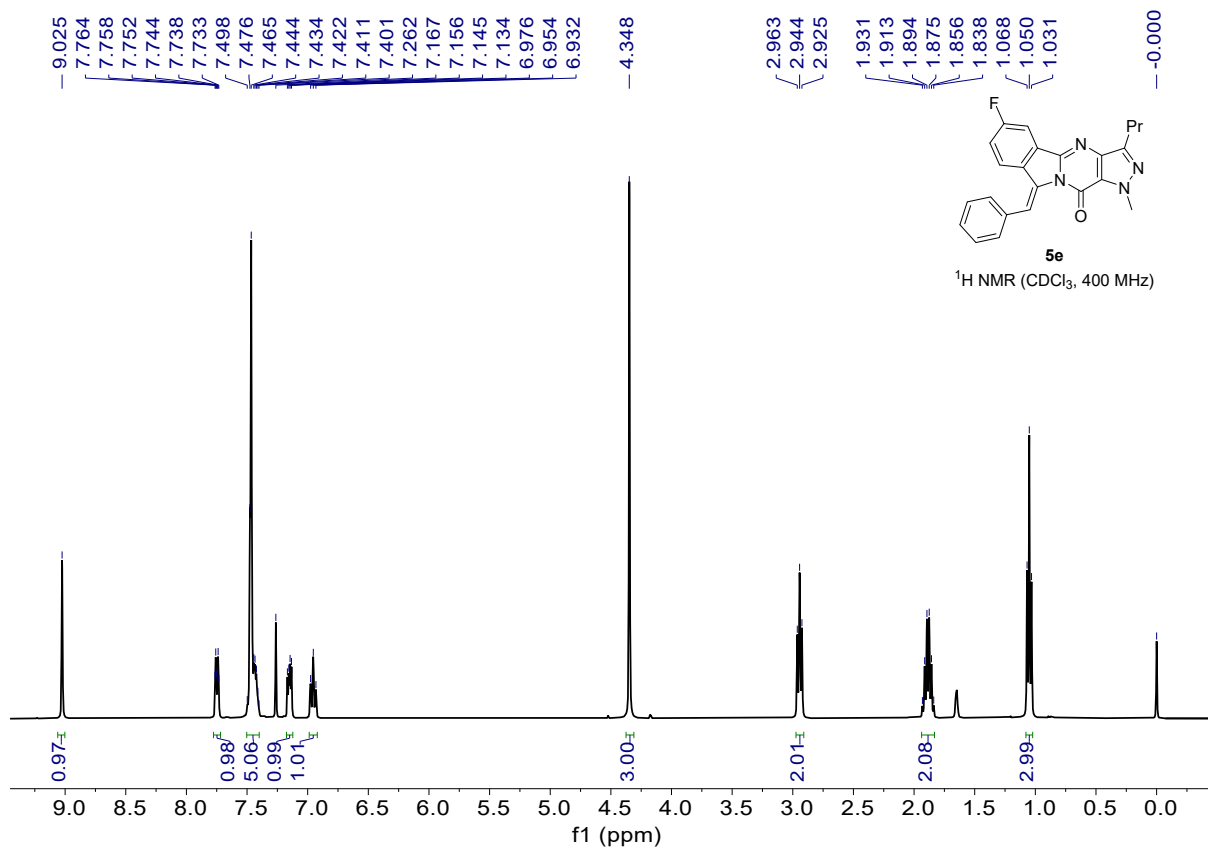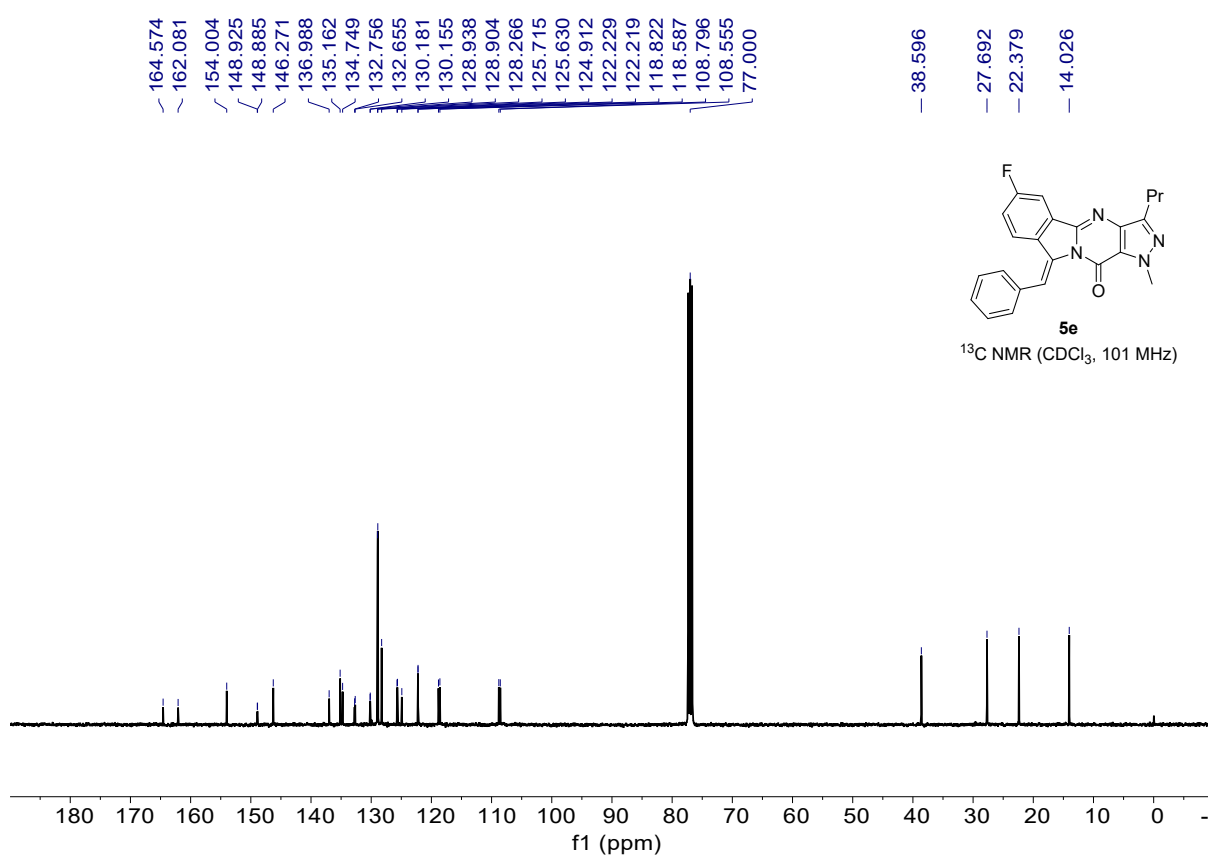



**(E)-9-benzylidene-6-chloro-1-methyl-3-propyl-1,9-dihydro-11H-pyrazolo[4',3':4,5]pyrimido[2,1-a]isoindol-11-one (5f)**

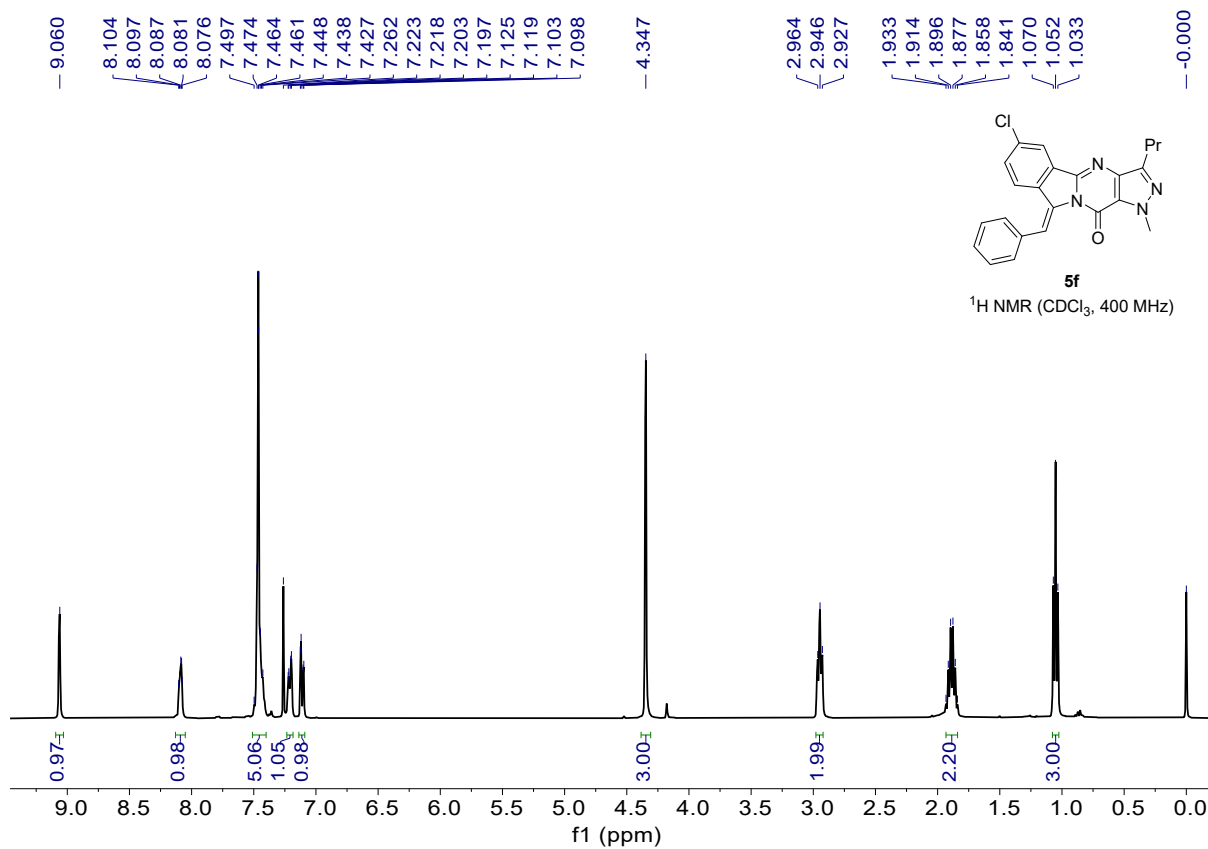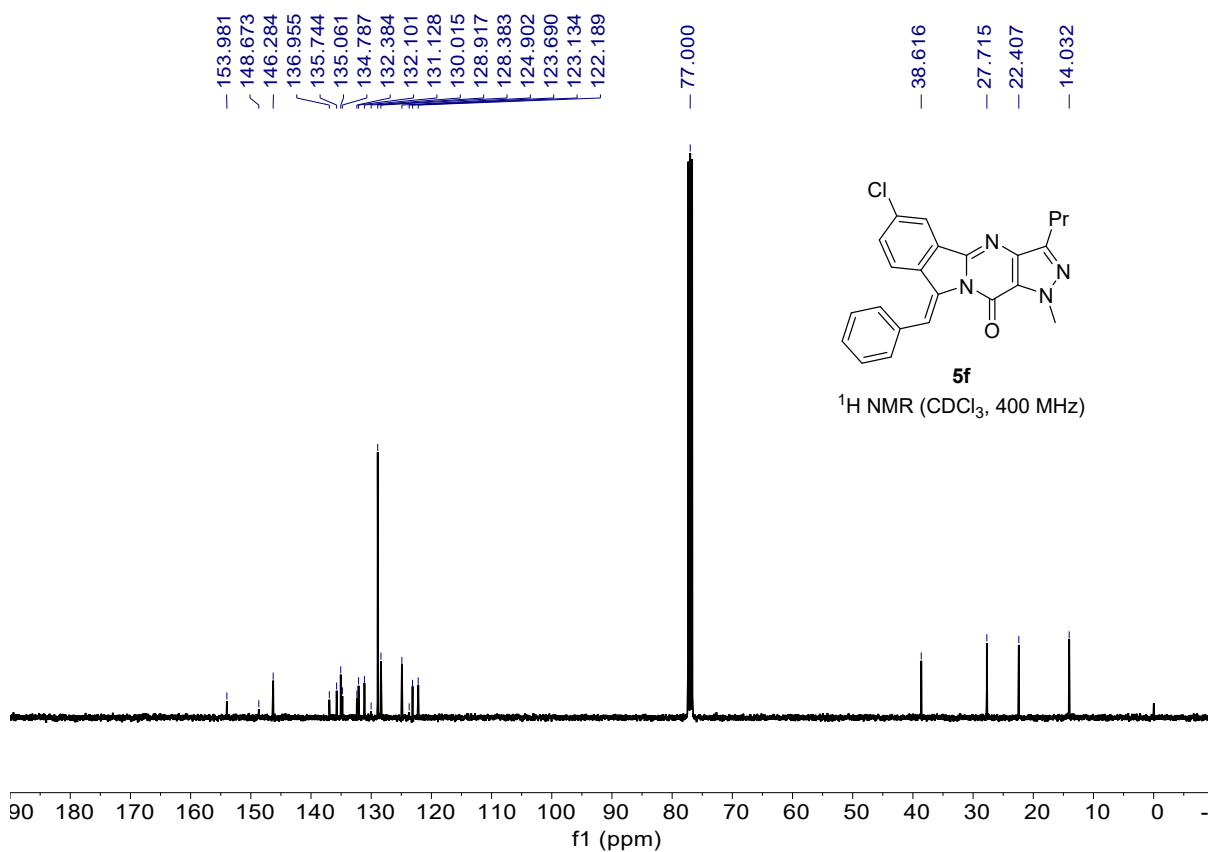

**(E)-9-benzylidene-6-methoxy-1-methyl-3-propyl-1,9-dihydro-11H-pyrazolo[4',3':4,5]pyrimido[2,1-a]isoindol-11-one (5g)**

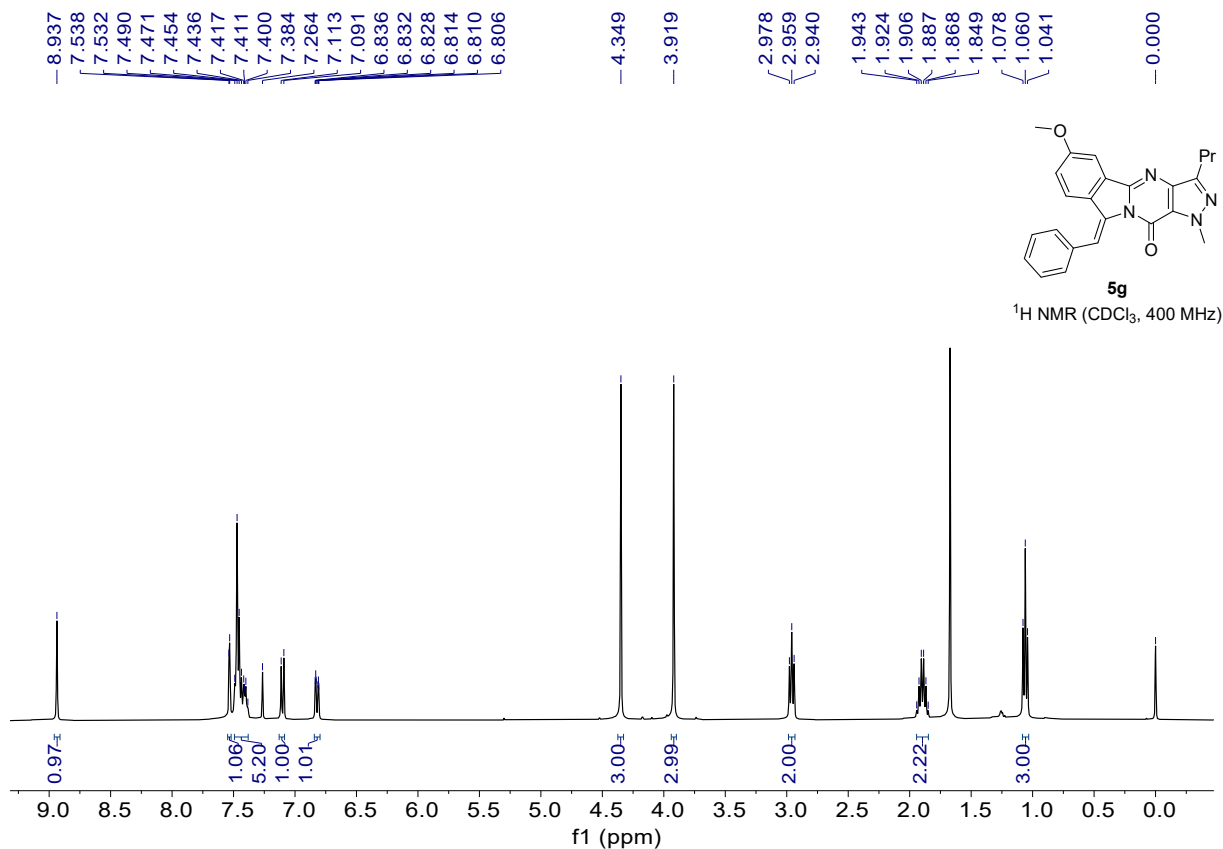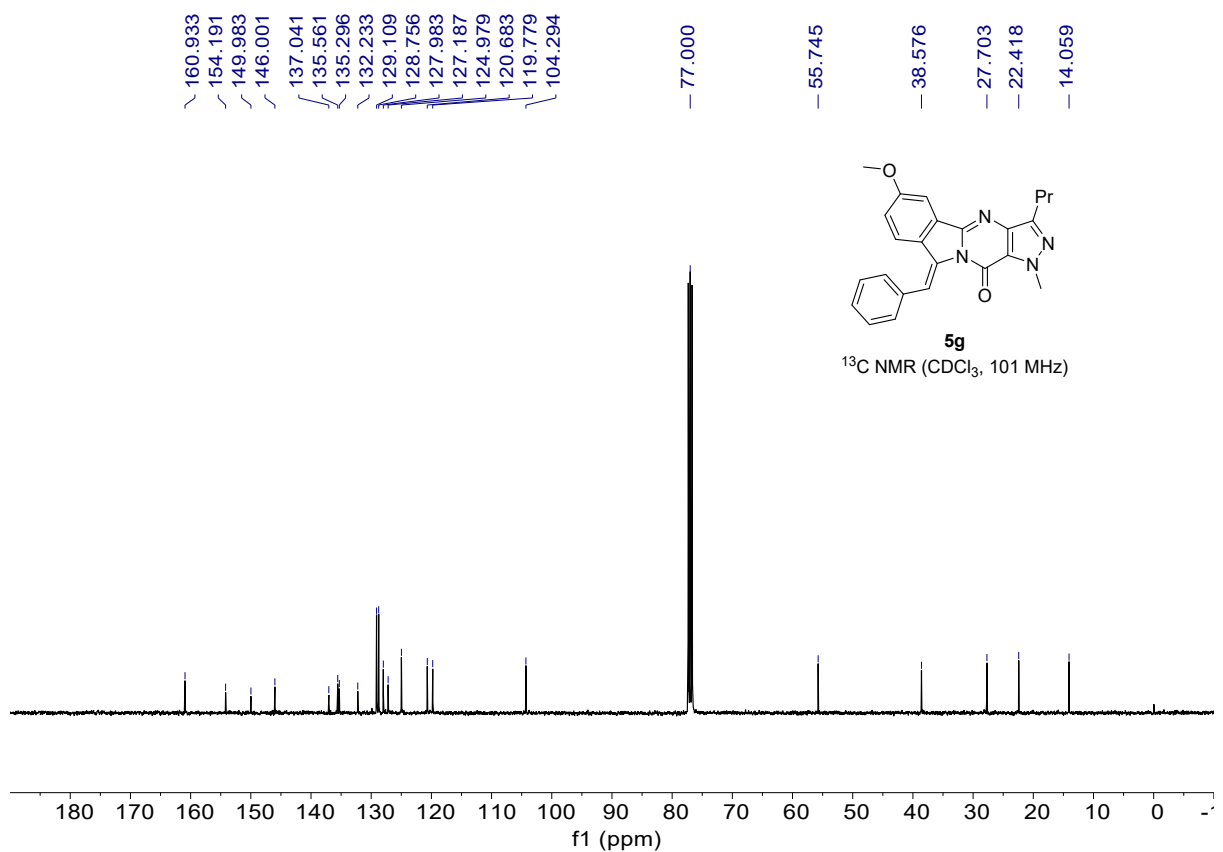

**(E)-9-benzylidene-6-fluoro-1-methyl-3-propyl-1,9-dihydro-11H-pyrazolo[4',3':4,5]pyrimido[2,1-a]isoindol-11-one (5h)**

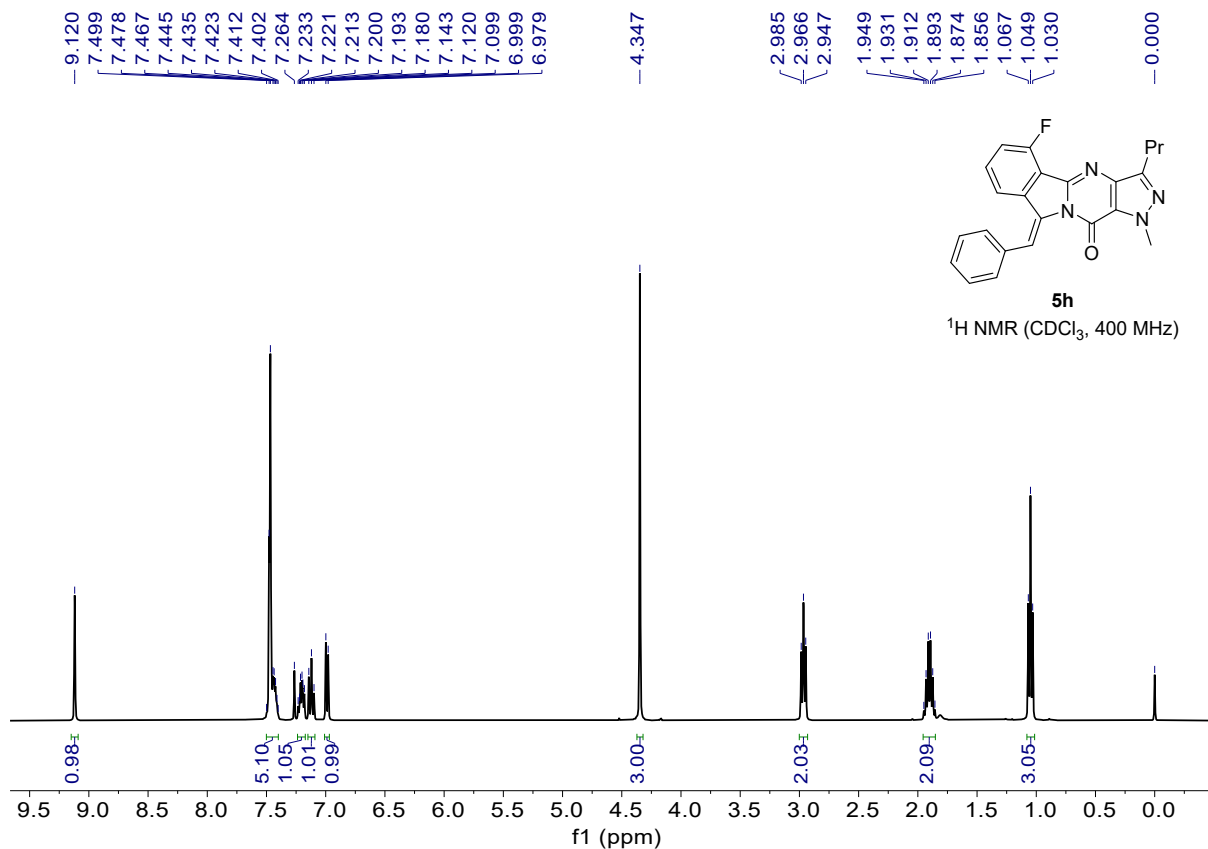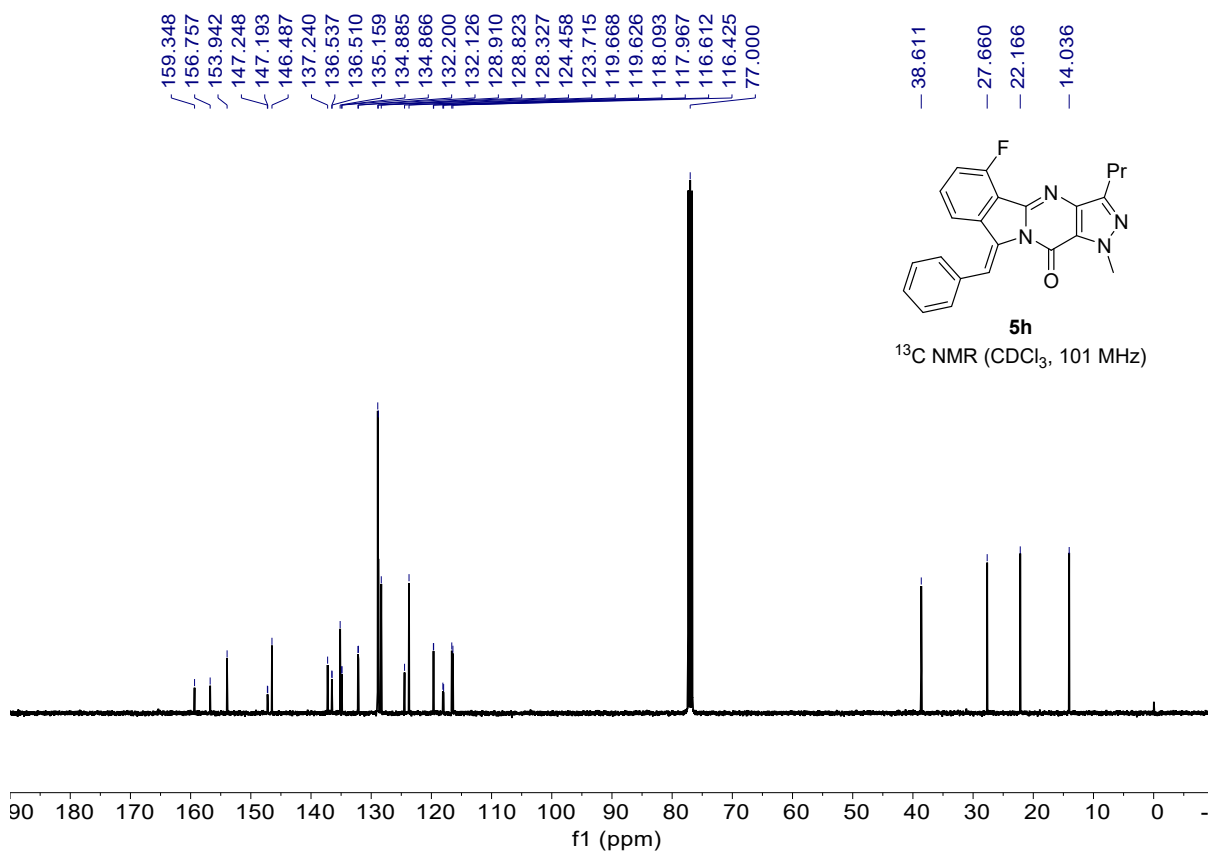

**(E)-13-benzylidene-10-methyl-8-propyl-10,13-dihydro-11H-**

**benzo[e]pyrazolo[4',3':4,5]pyrimido[2,1-a]isoindol-11-one (5i)**

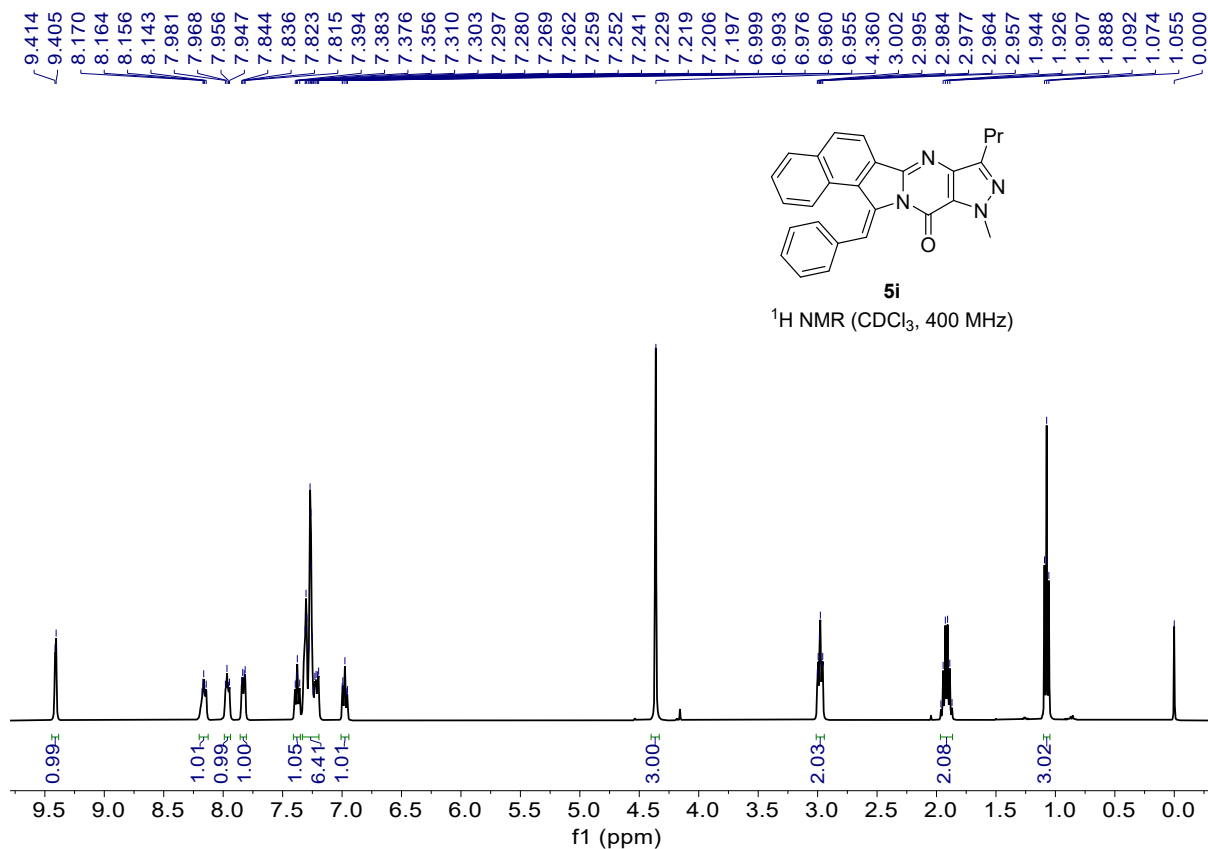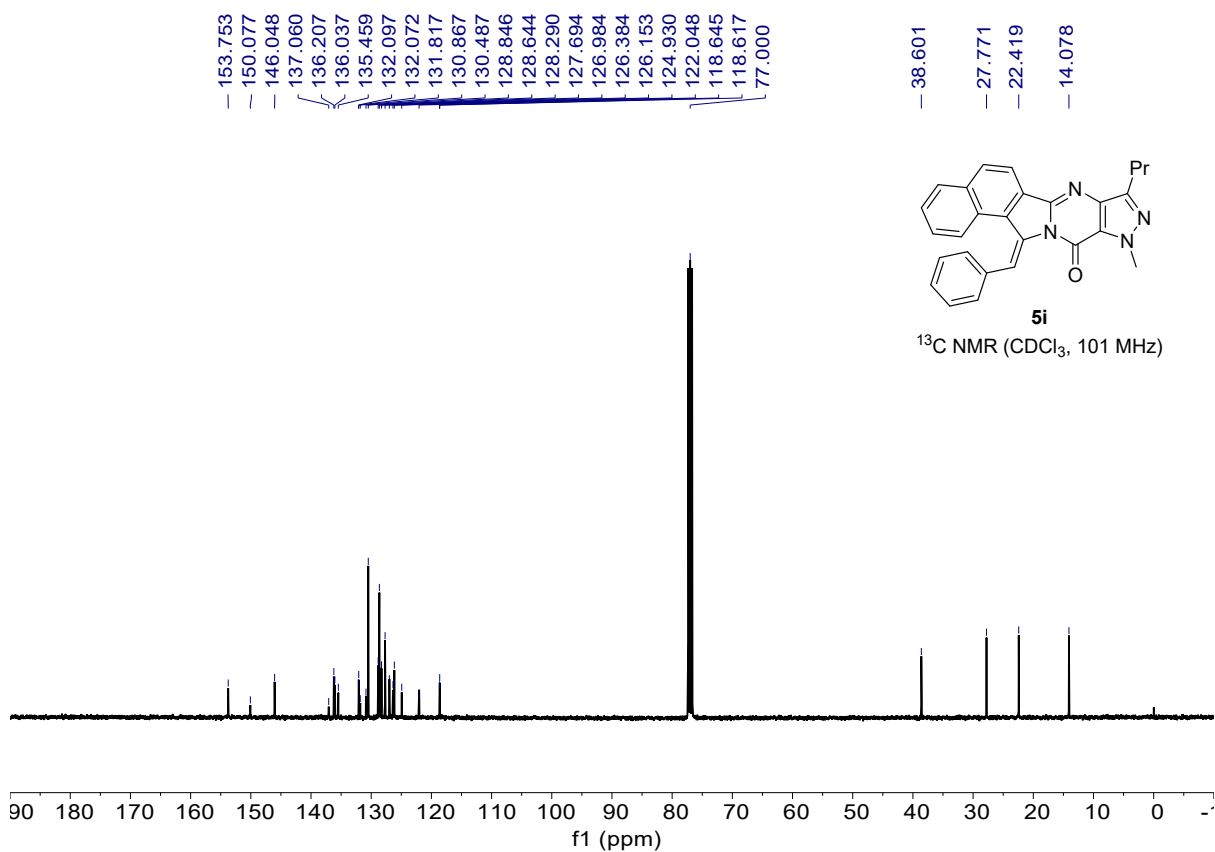

**(E)-10-benzylidene-1-methyl-3-propyl-1,10-dihydro-12H-[1,3]dioxolo[4,5-f]pyrazolo[4',3':4,5]pyrimido[2,1-a]isoindol-12-one (5j)**

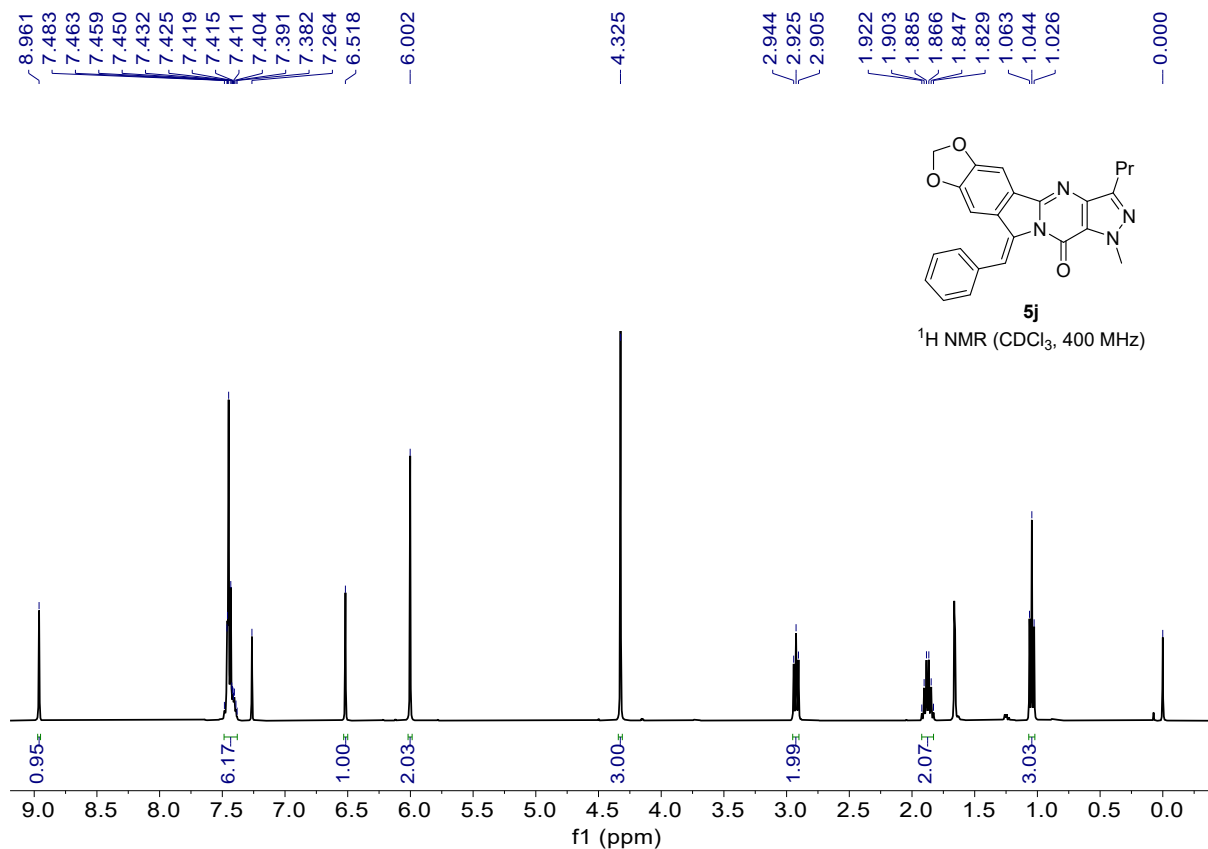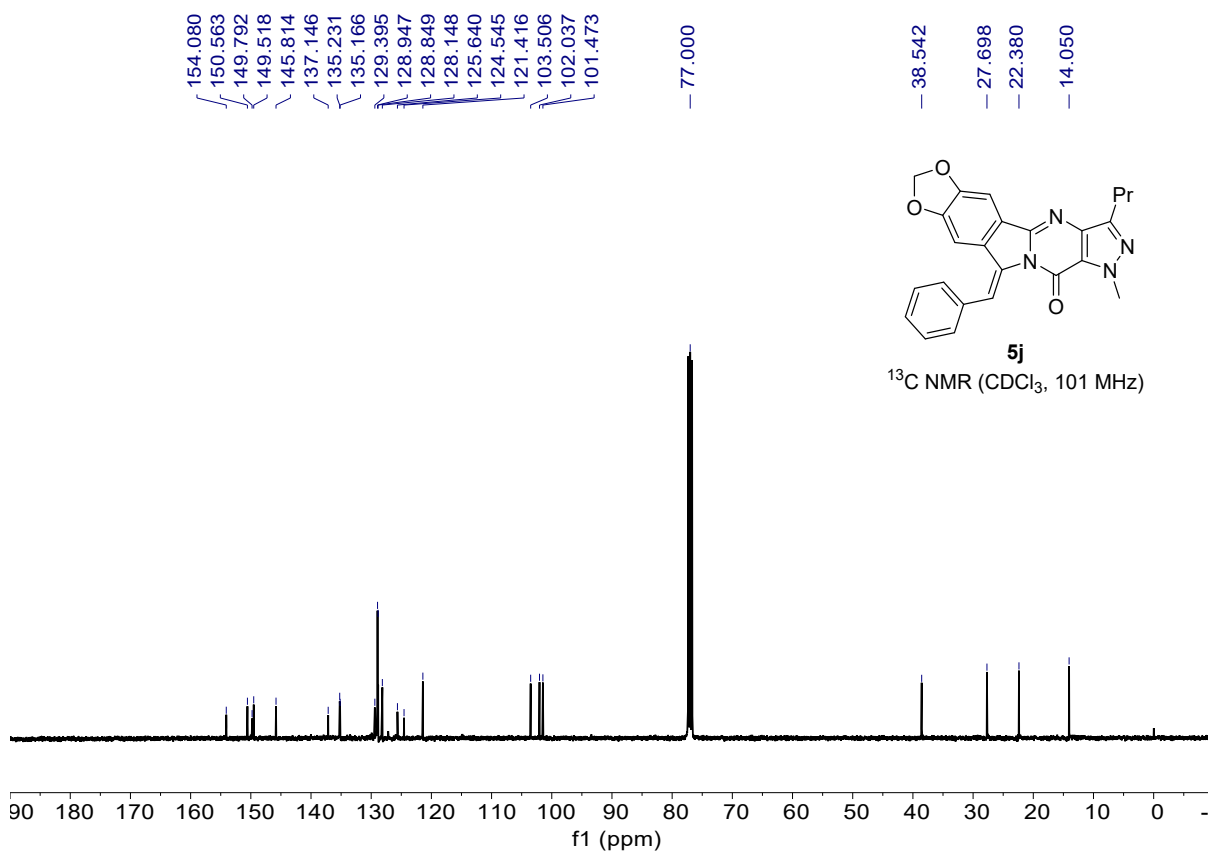

**(E)-9-benzylidene-6,7-dimethoxy-1-methyl-3-propyl-1,9-dihydro-11H-pyrazolo[4',3':4,5]pyrimido[2,1-a]isoindol-11-one (5k)**

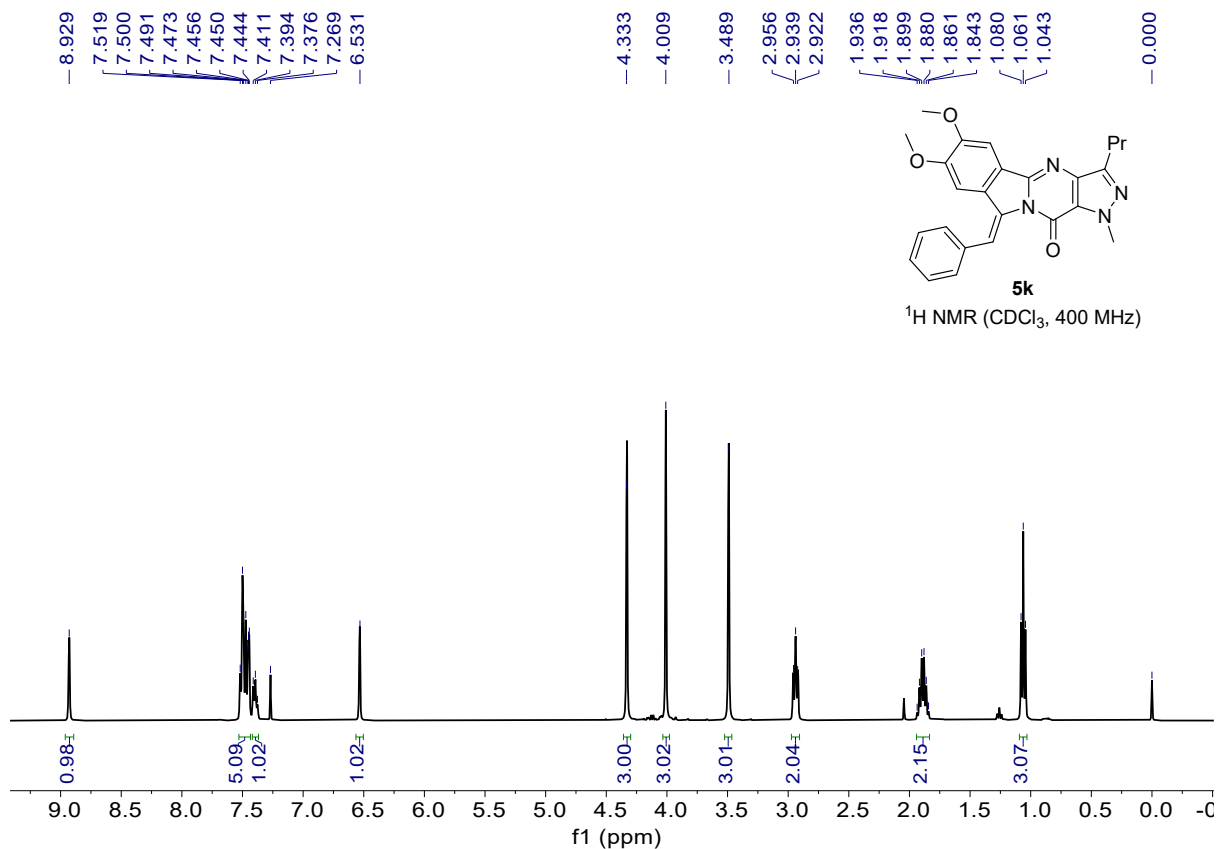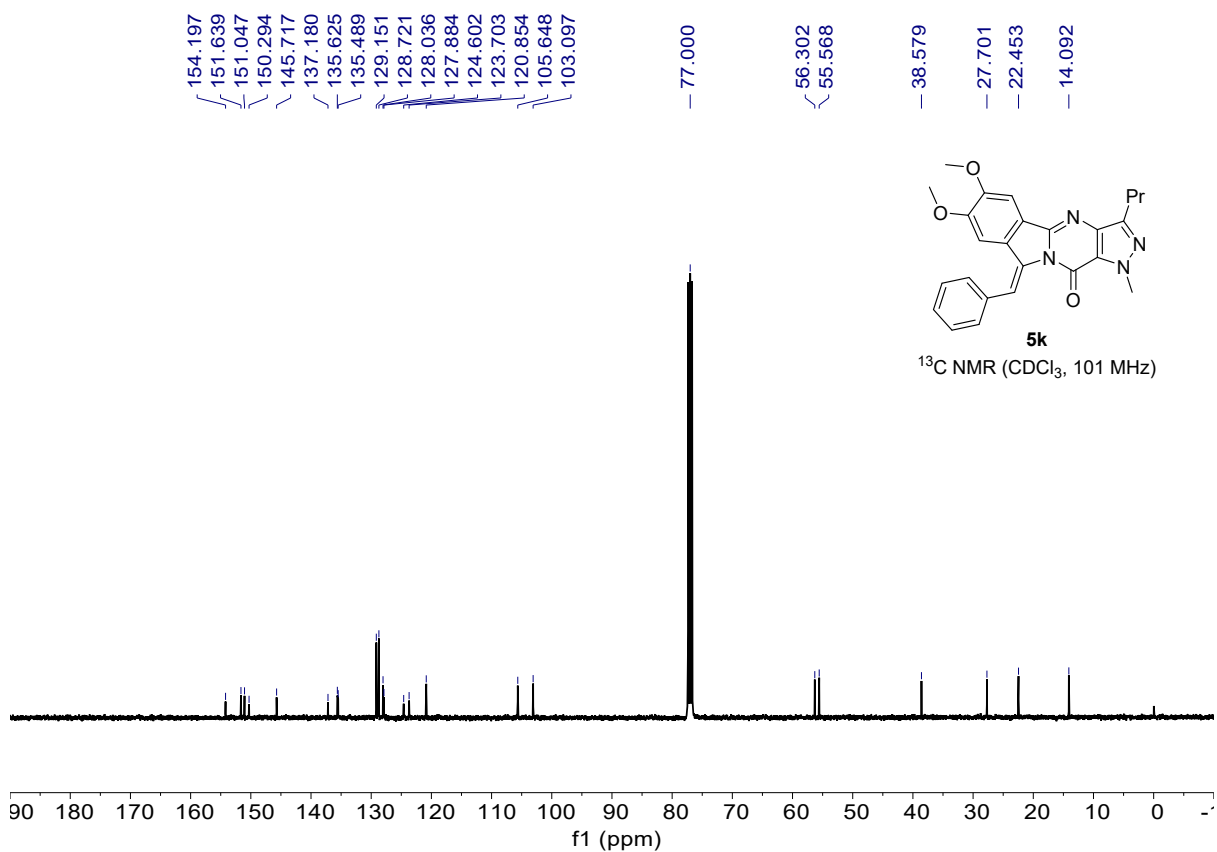

**(E)-6,7-dimethoxy-9-(2-methoxybenzylidene)-1-methyl-3-propyl-1,9-dihydro-11H-pyrazolo[4',3':4,5]pyrimido[2,1-a]isoindol-11-one (5I)**

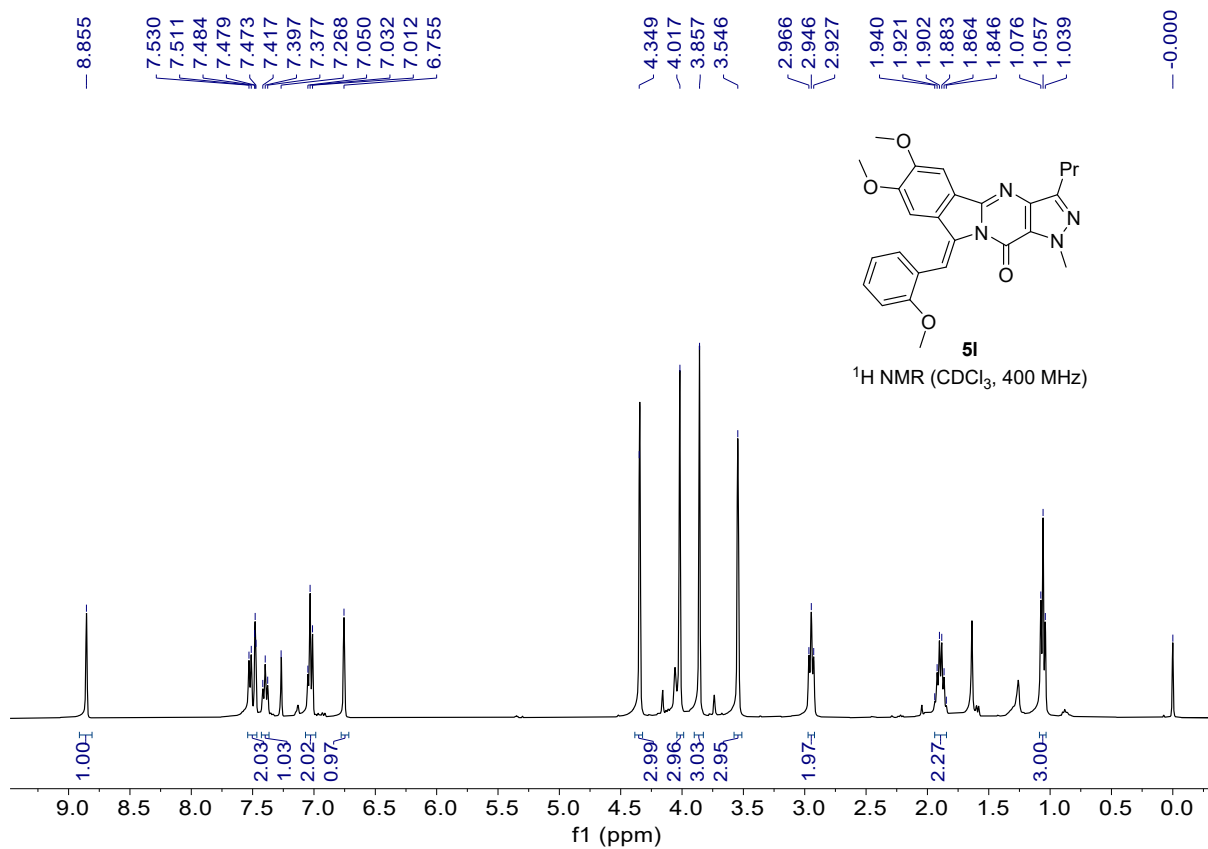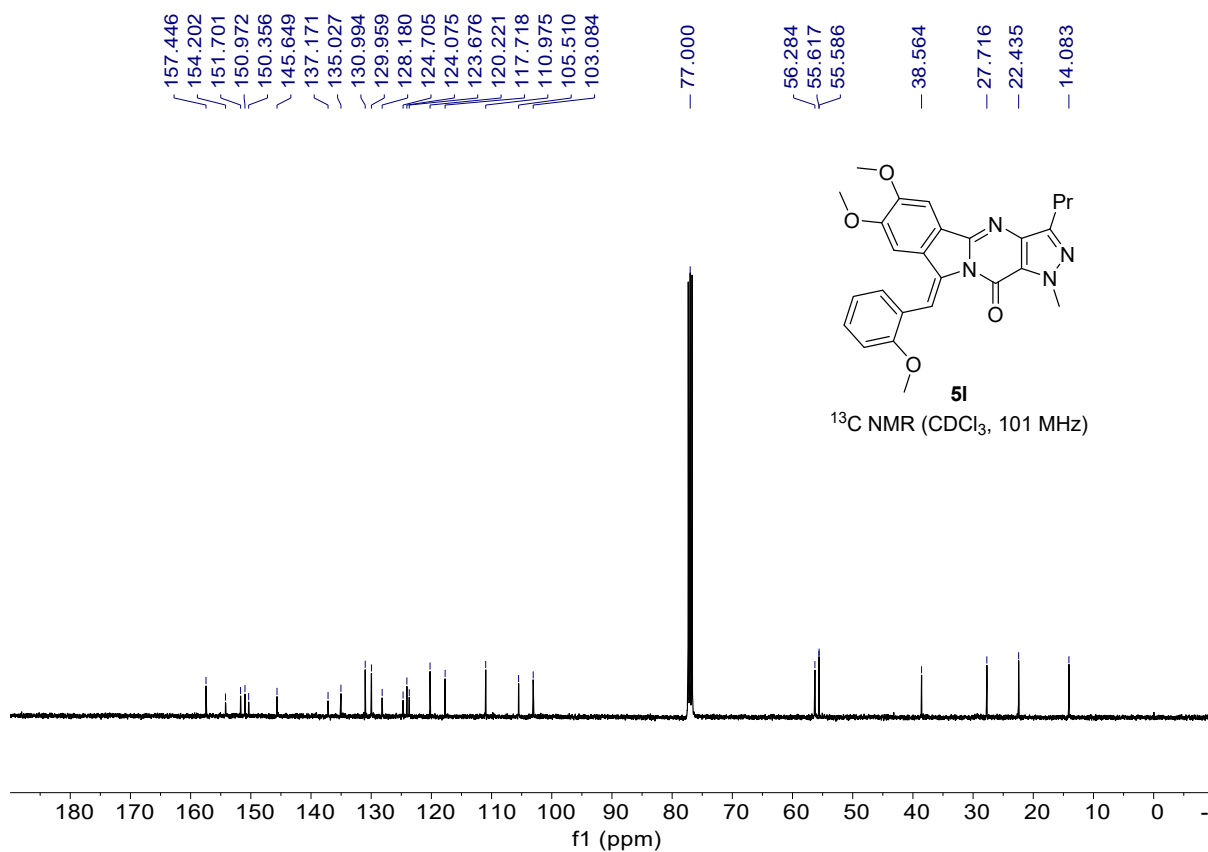

**(E)-1-methyl-9-(naphthalen-2-ylmethylene)-3-propyl-1,9-dihydro-11H-pyrazolo[4',3':4,5]pyrimido[2,1-a]isoindol-11-one (5m)**

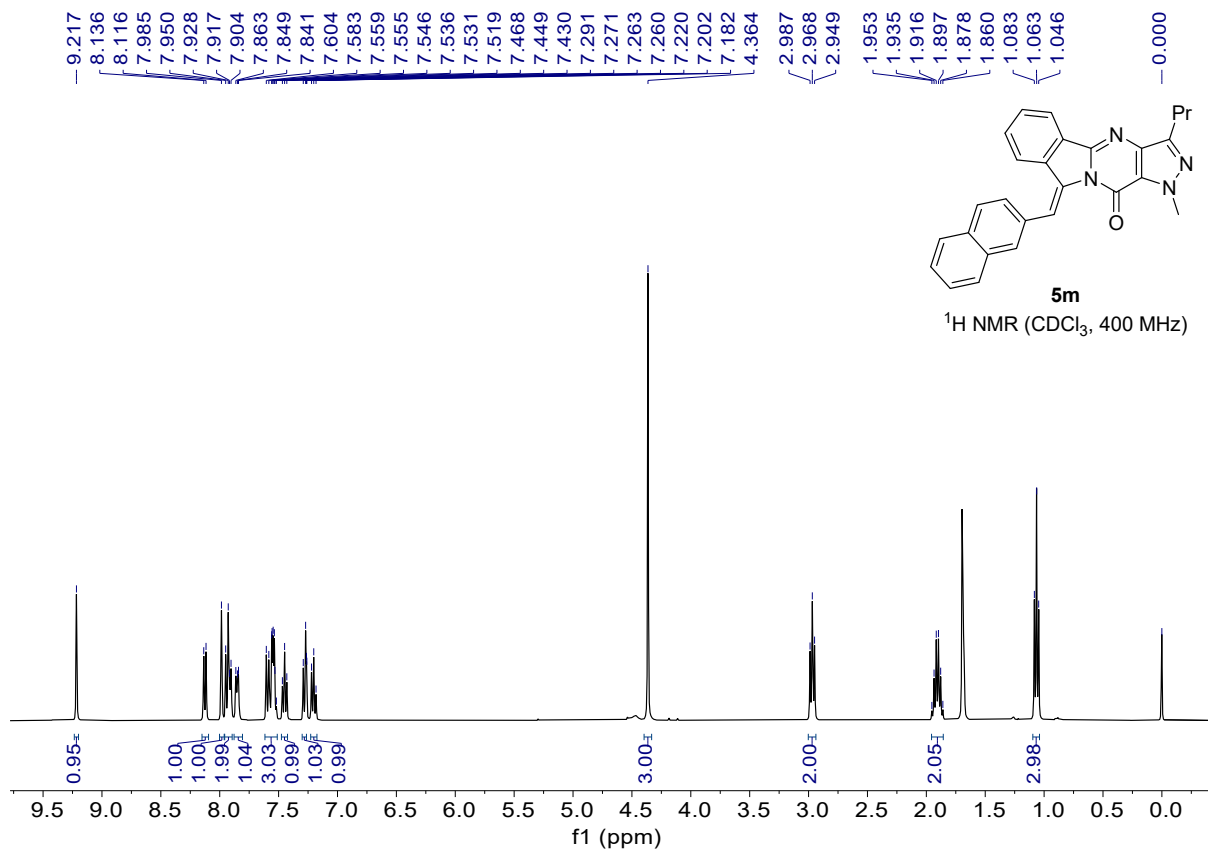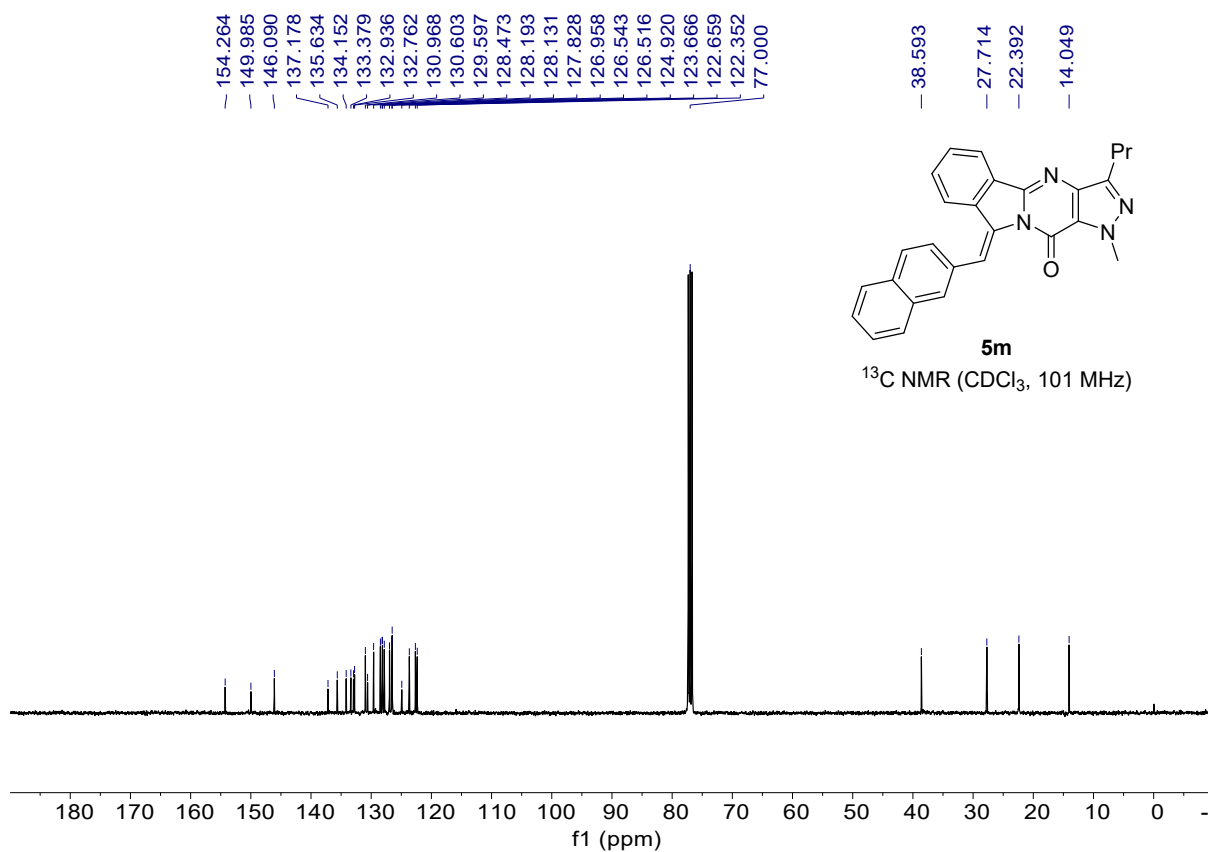



**(E)-1-methyl-3-propyl-9-(thiophen-2-ylmethylene)-1,9-dihydro-11H-pyrazolo[4',3':4,5]pyrimido[2,1-a]isoindol-11-one (5n)**

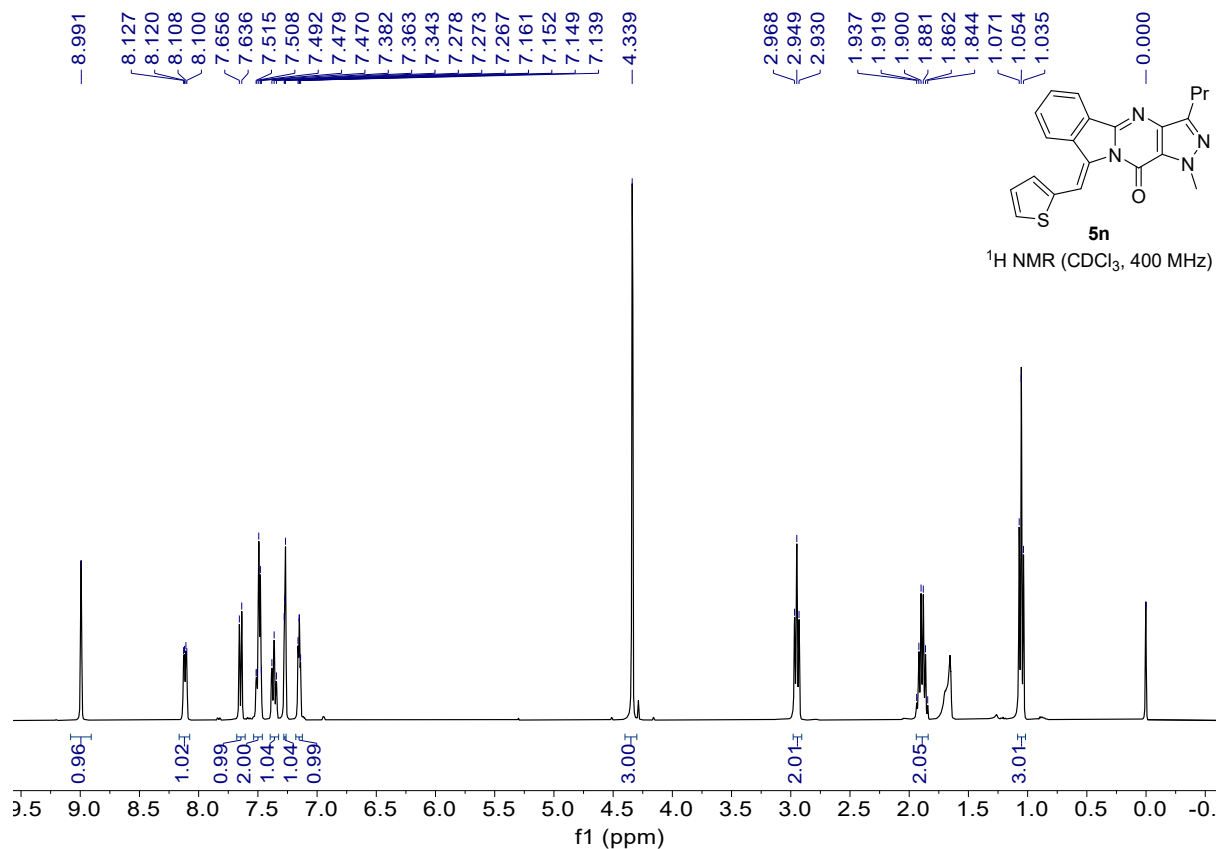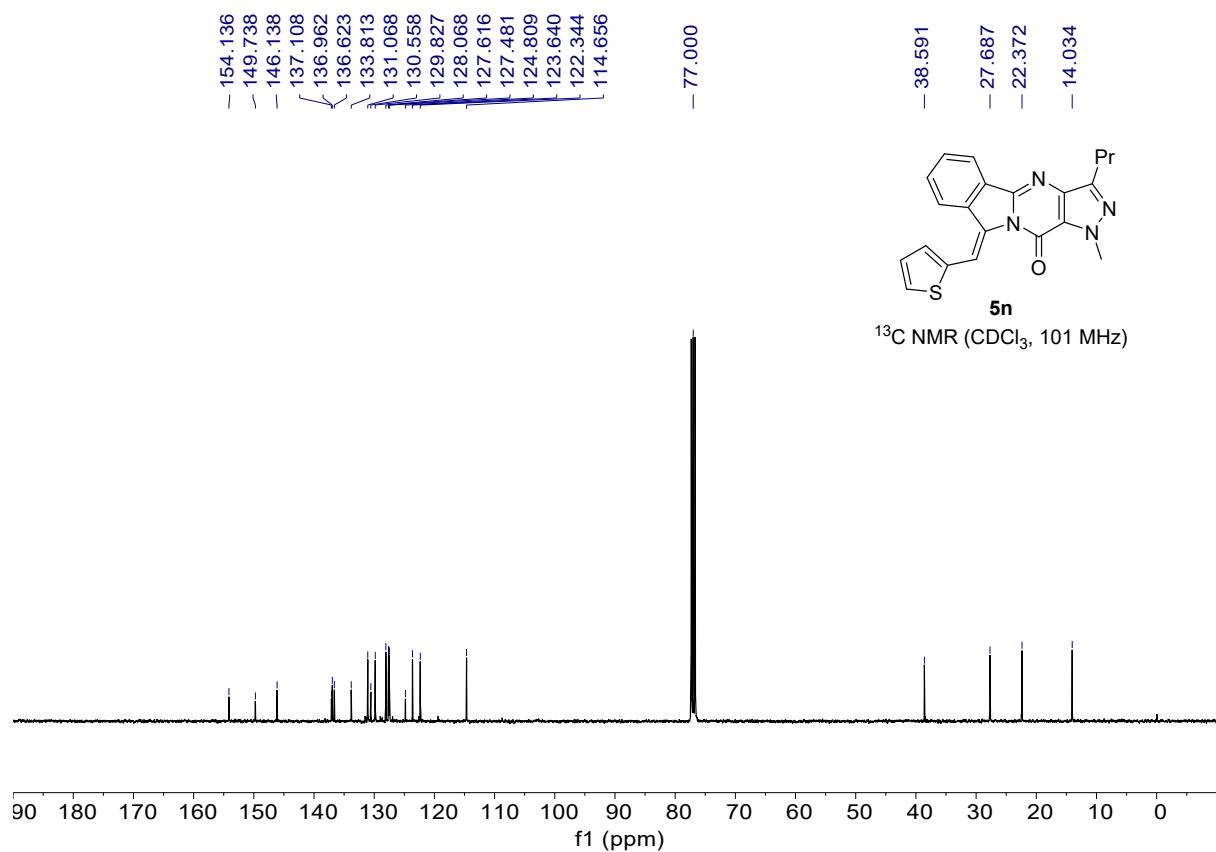

**(E)-9-(4-fluorobenzylidene)-1-methyl-3-propyl-1,9-dihydro-11H-pyrazolo[4',3':4,5]pyrimido[2,1-*a*]isoindol-11-one (5o)**

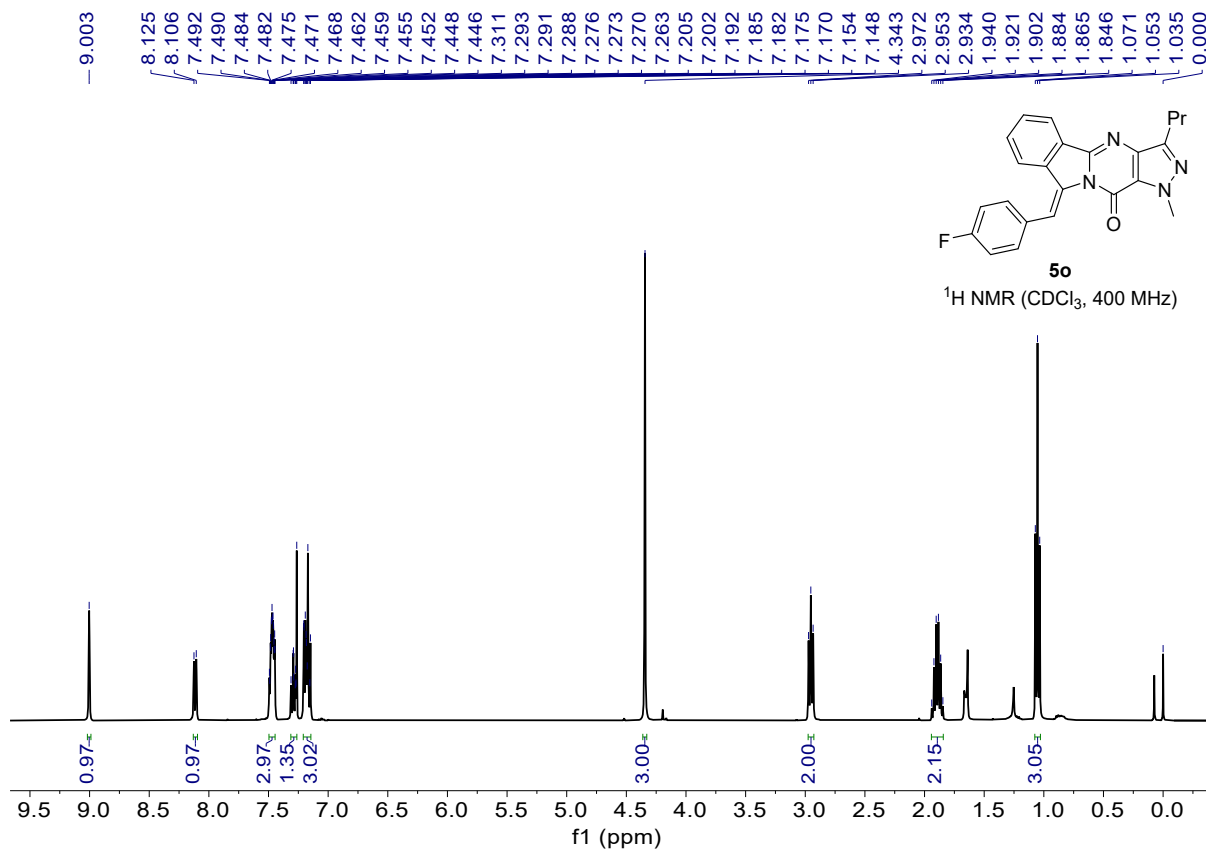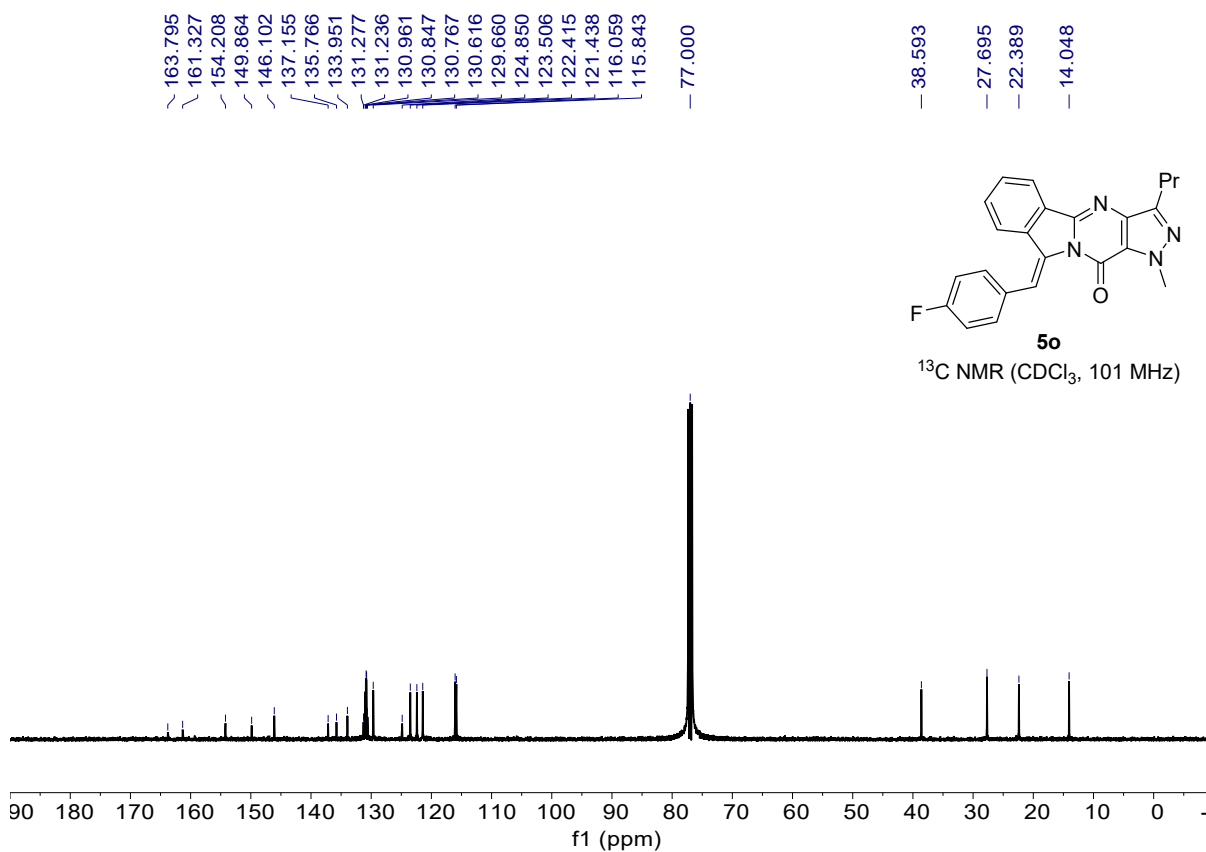

**(E)-9-(4-chlorobenzylidene)-1-methyl-3-propyl-1,9-dihydro-11H-pyrazolo[4',3':4,5]pyrimido[2,1-a]isoindol-11-one (5p)**

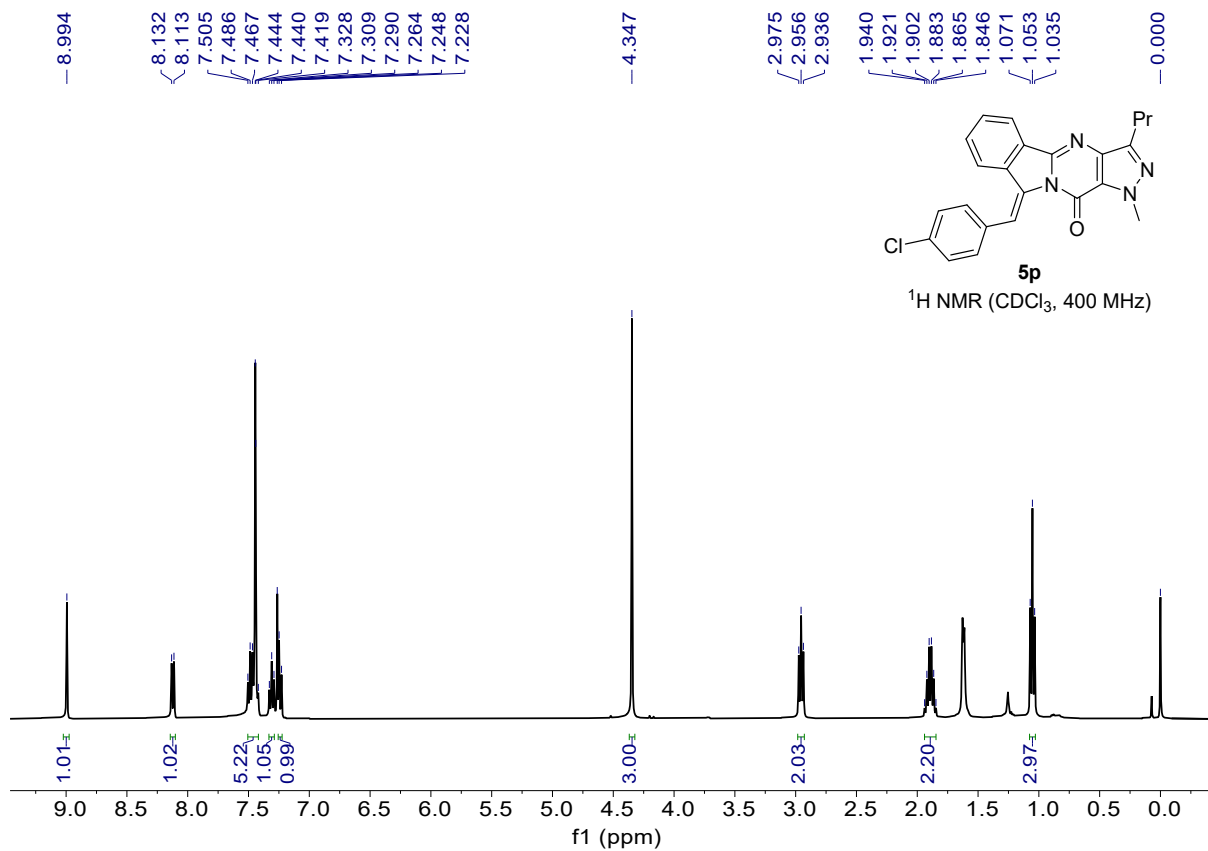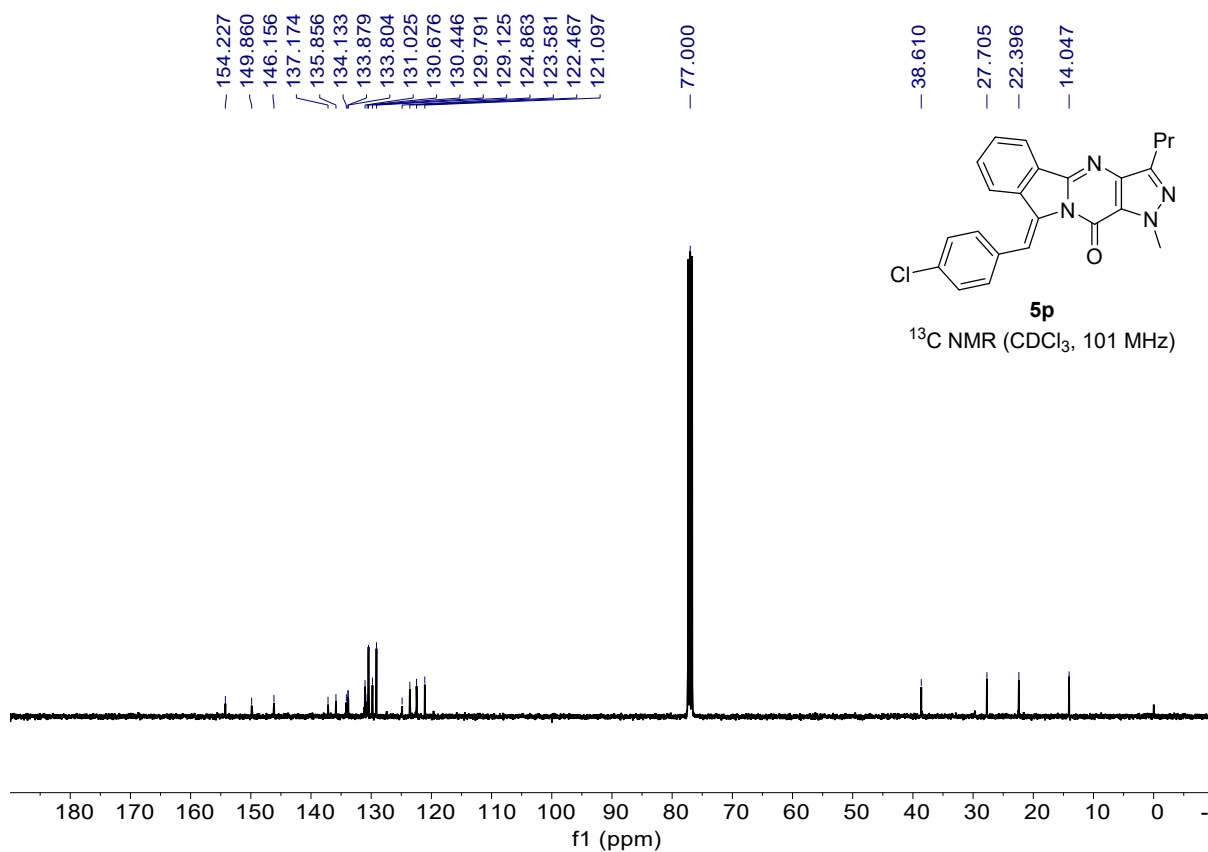

**(E)-1-methyl-9-(4-methylbenzylidene)-3-propyl-1,9-dihydro-11H-pyrazolo[4',3':4,5]pyrimido[2,1-*a*]isoindol-11-one (5q)**

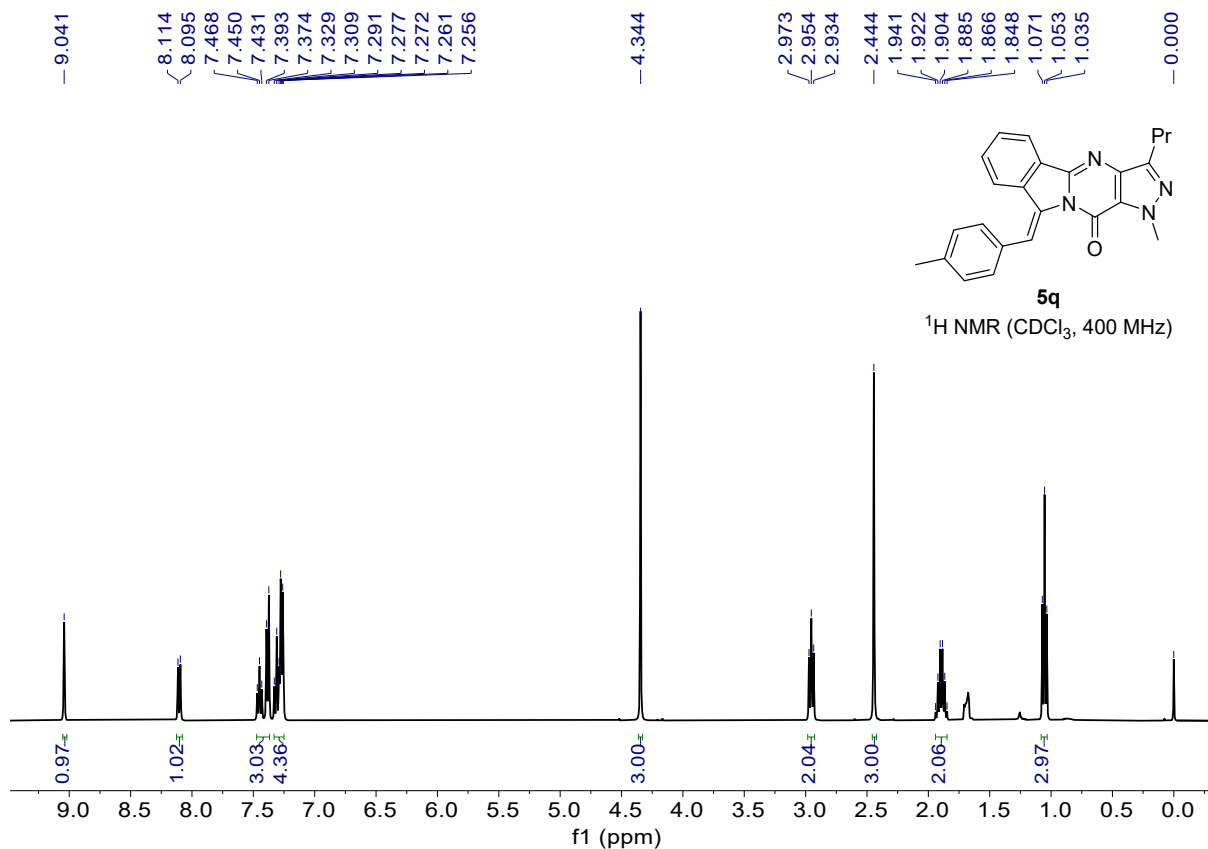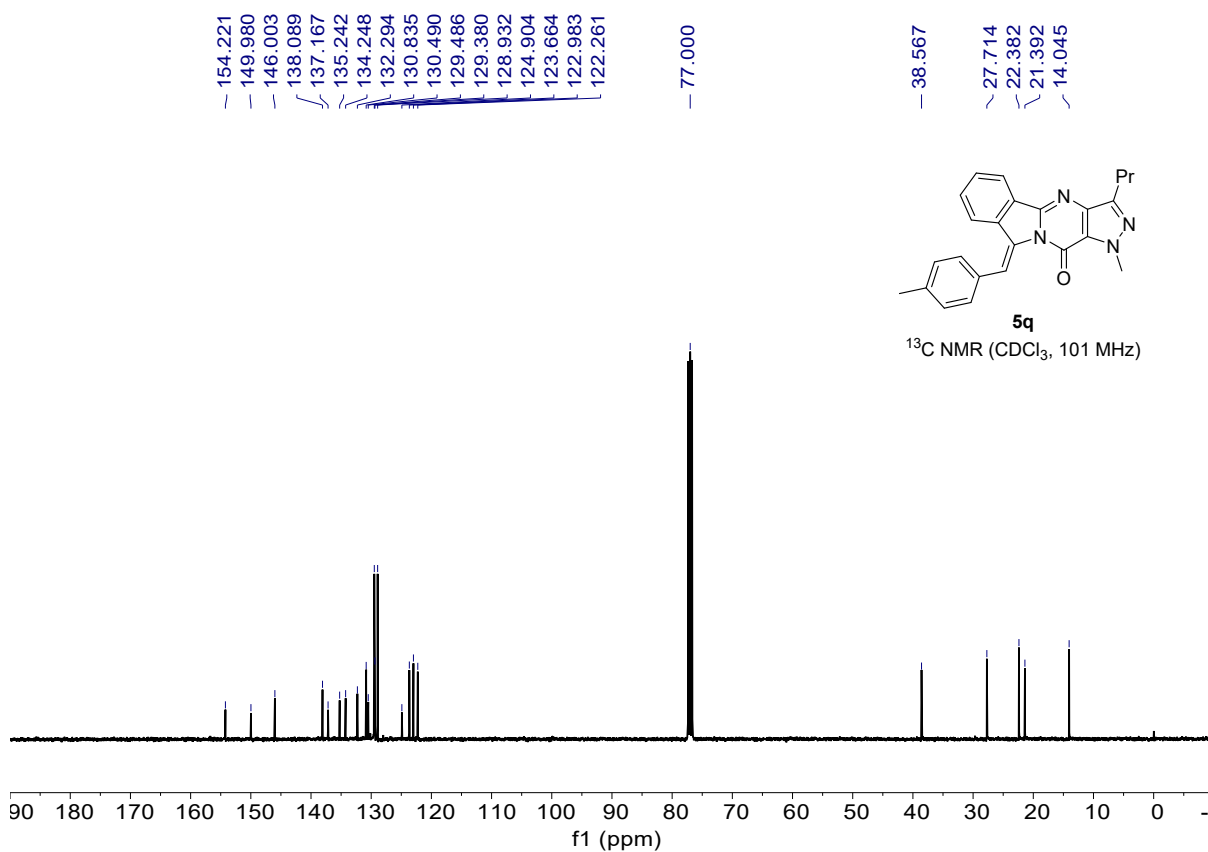

**(E)-9-(4-methoxybenzylidene)-1-methyl-3-propyl-1,9-dihydro-11H-pyrazolo[4',3':4,5]pyrimido[2,1-a]isoindol-11-one (5r)**

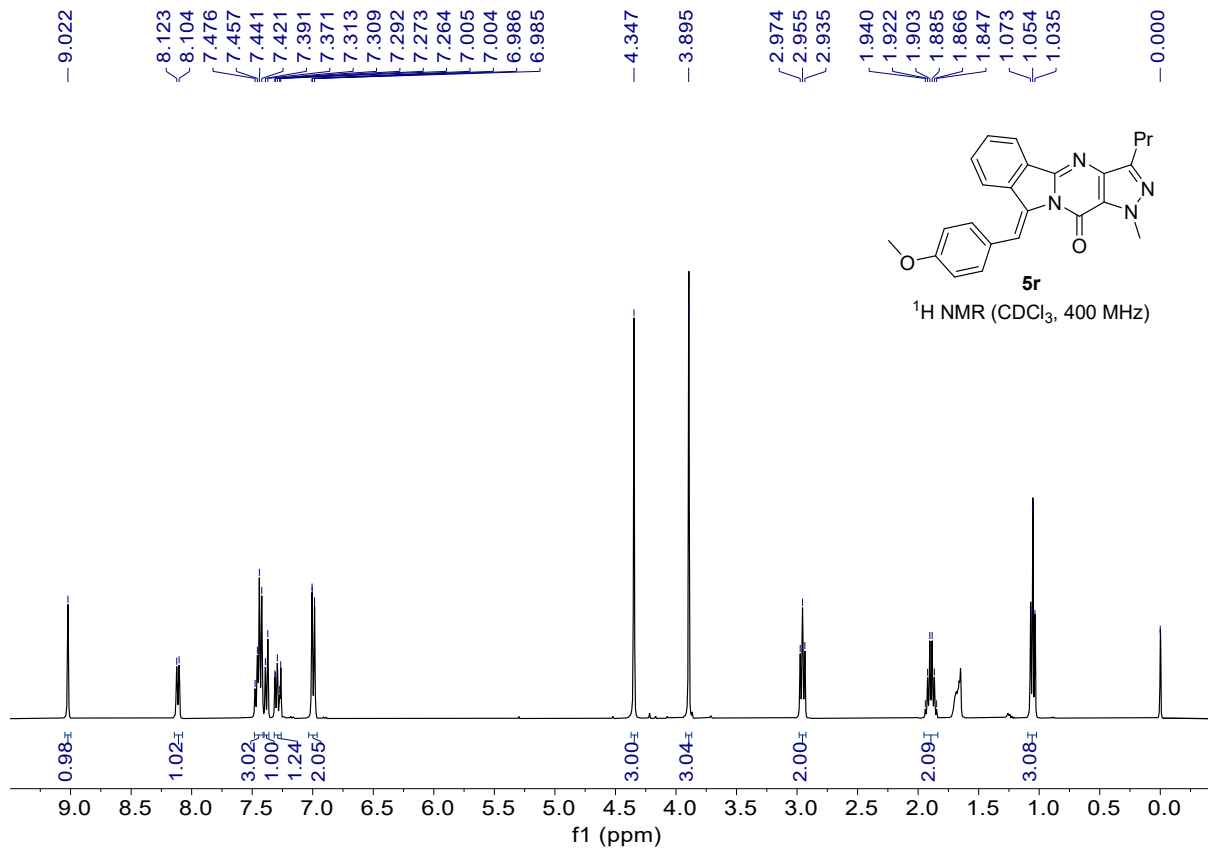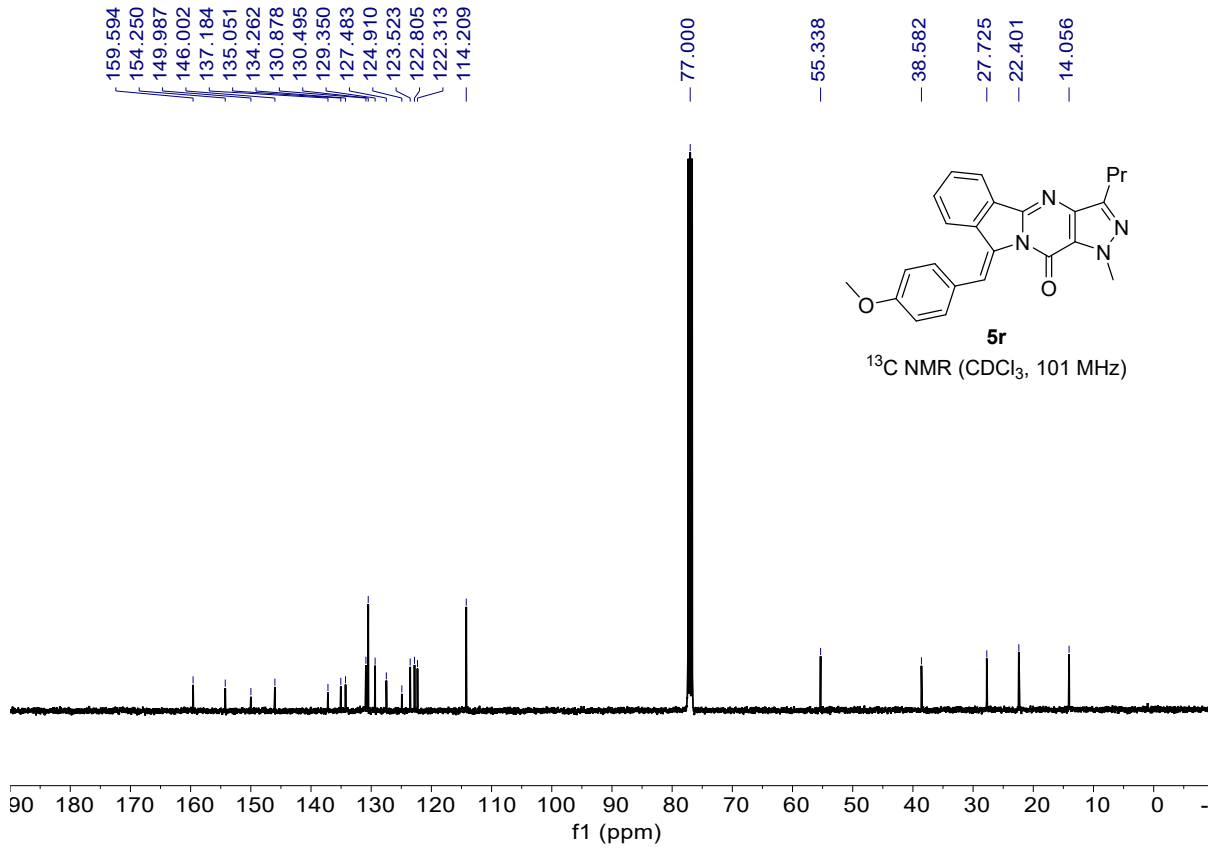

**(E)-9-(4-ethylbenzylidene)-1-methyl-3-propyl-1,9-dihydro-11H-pyrazolo[4',3':4,5]pyrimido[2,1-a]isoindol-11-one (5s)**

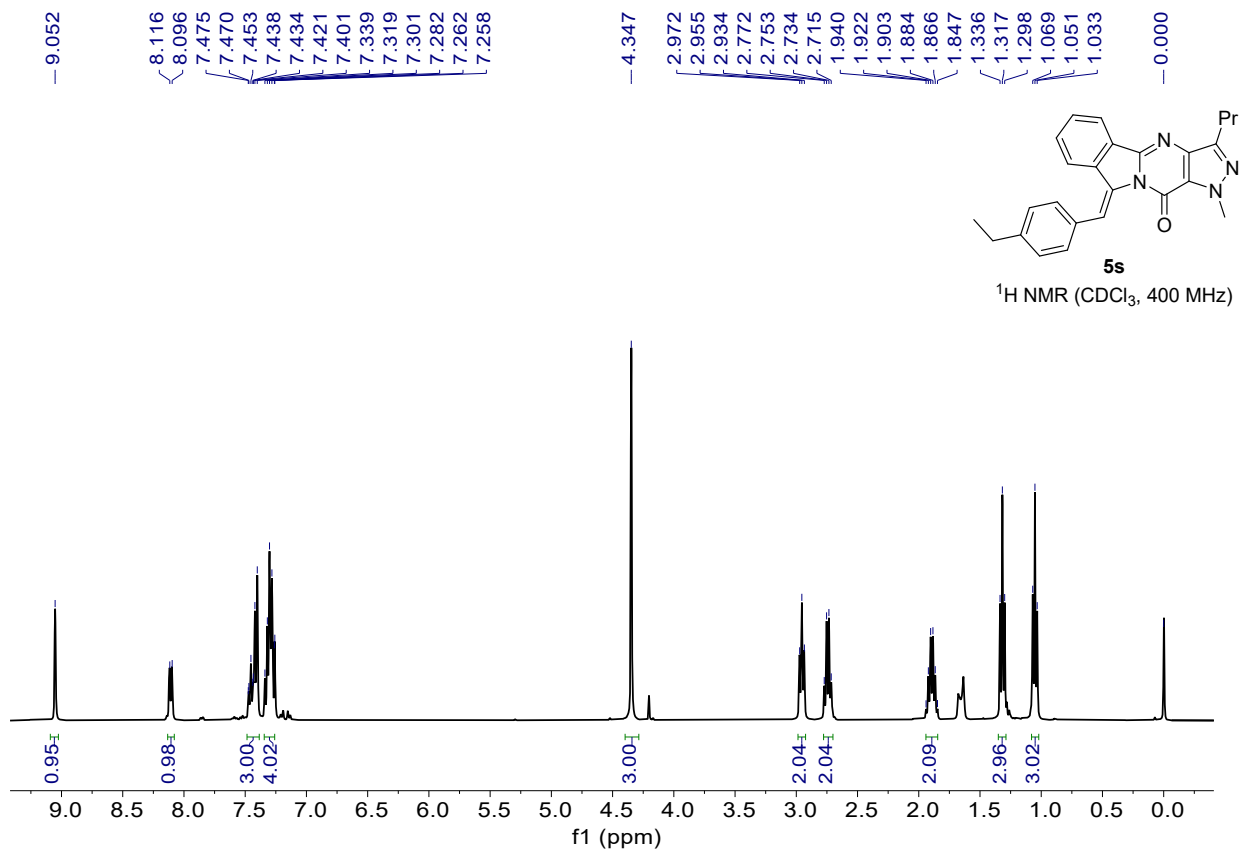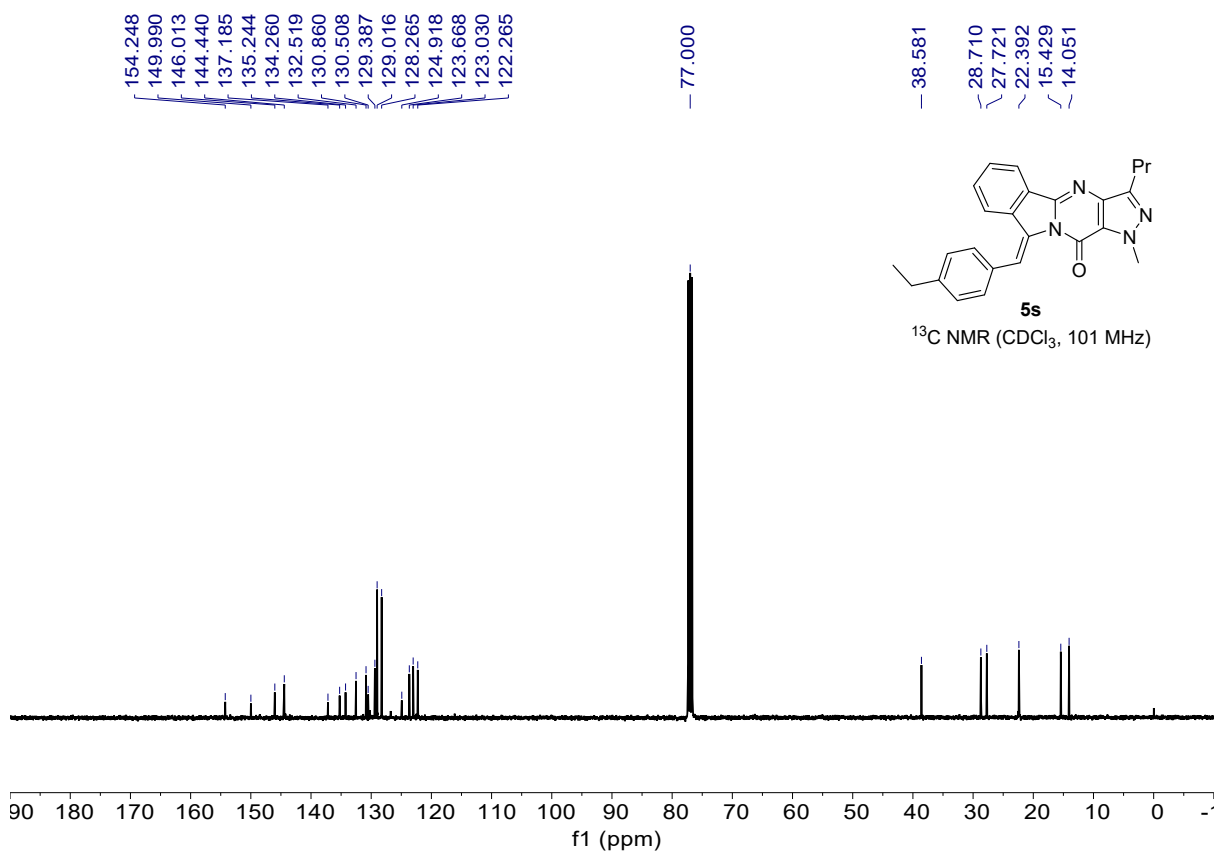

**(E)-9-(4-ethoxybenzylidene)-1-methyl-3-propyl-1,9-dihydro-11H-pyrazolo[4',3':4,5]pyrimido[2,1-a]isoindol-11-one (5t)**

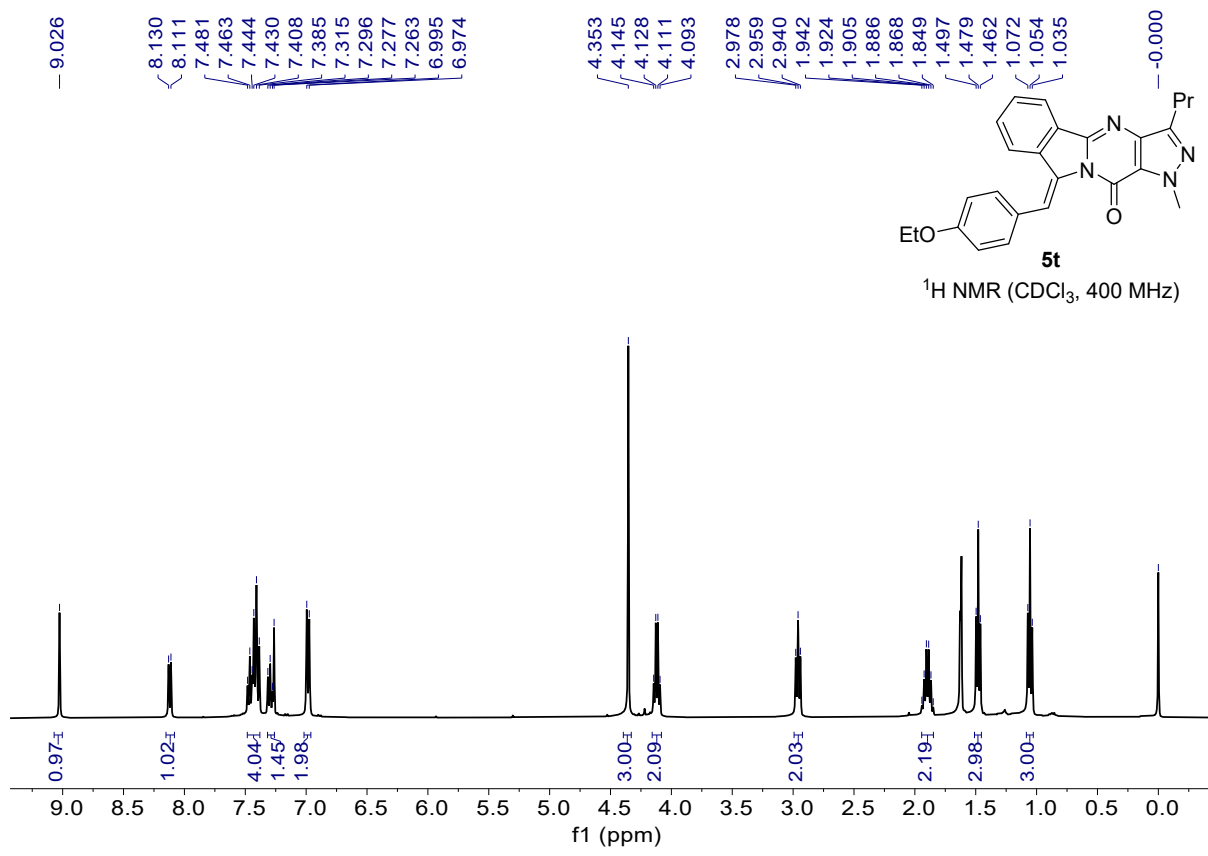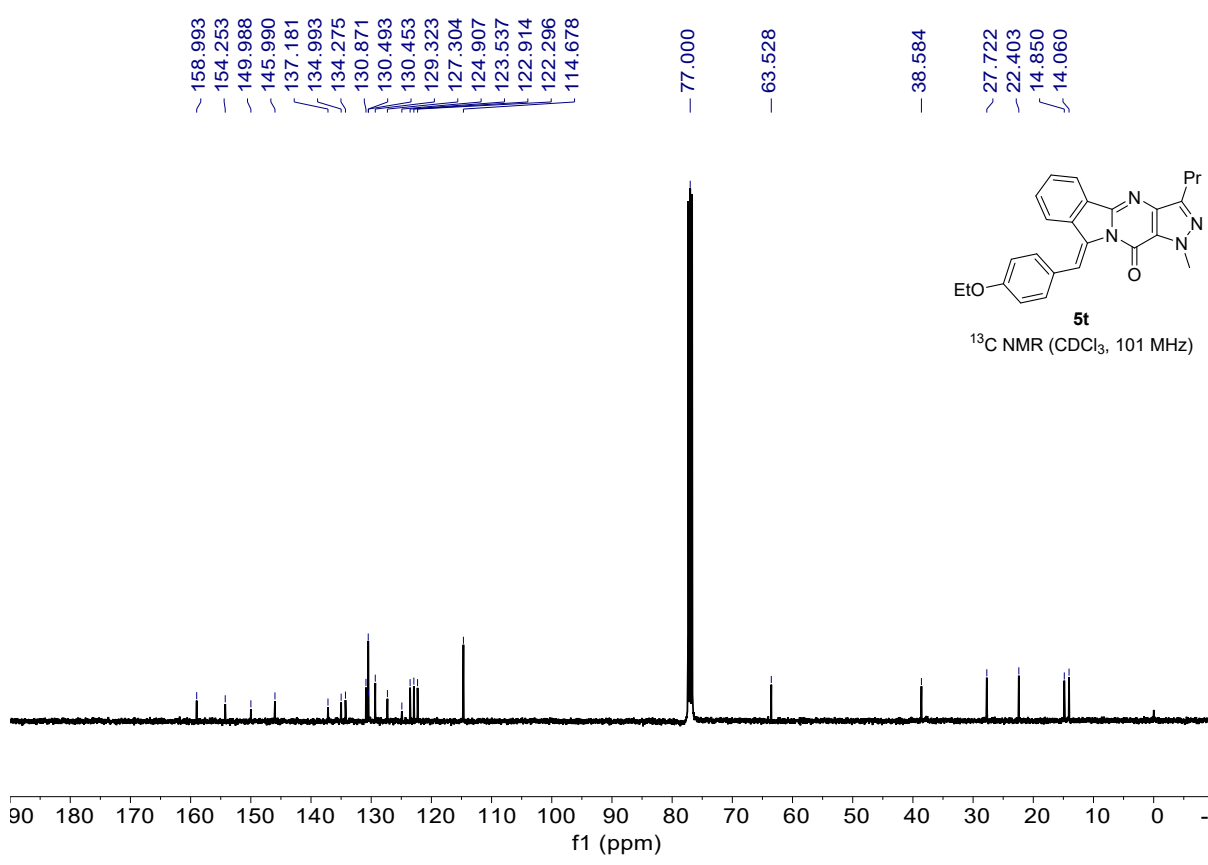

**(E)-1-methyl-3-propyl-9-(4-propylbenzylidene)-1,9-dihydro-11H-pyrazolo[4',3':4,5]pyrimido[2,1-*a*]isoindol-11-one (5u)**

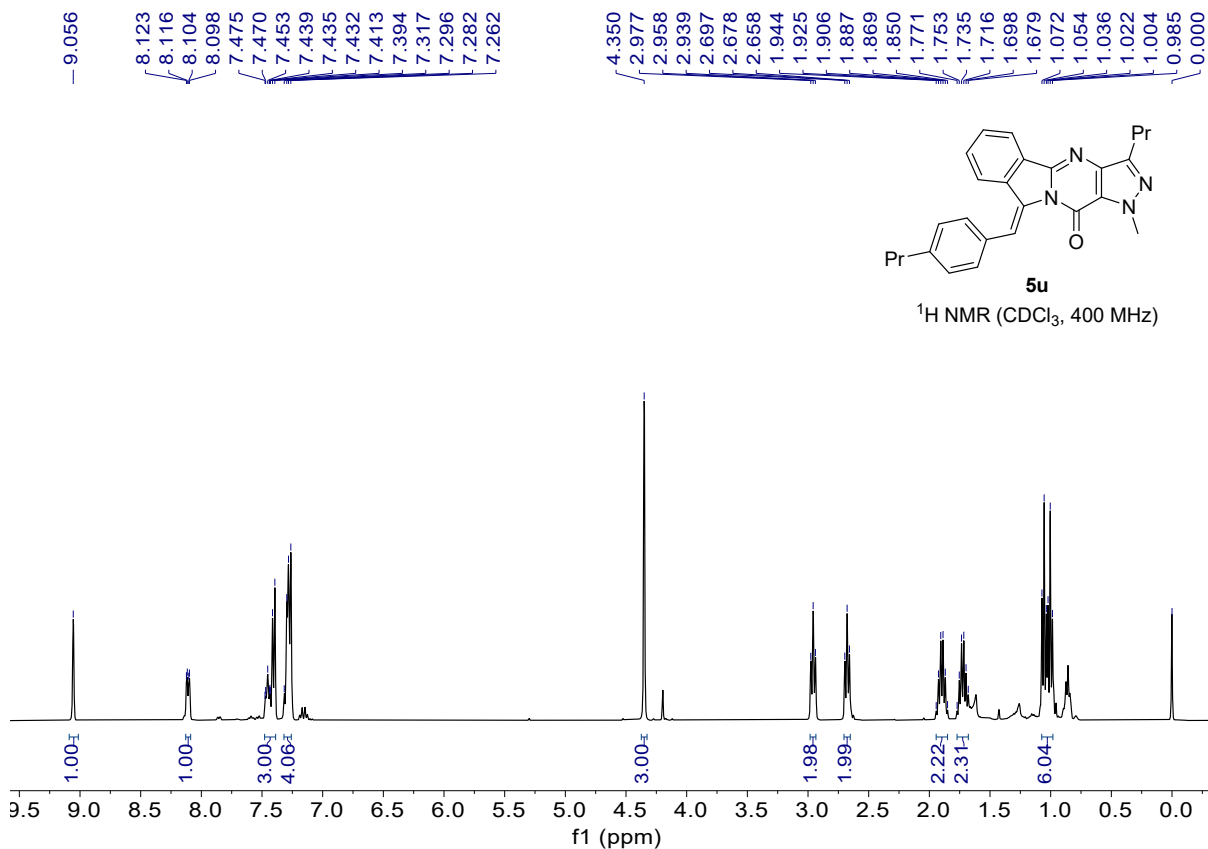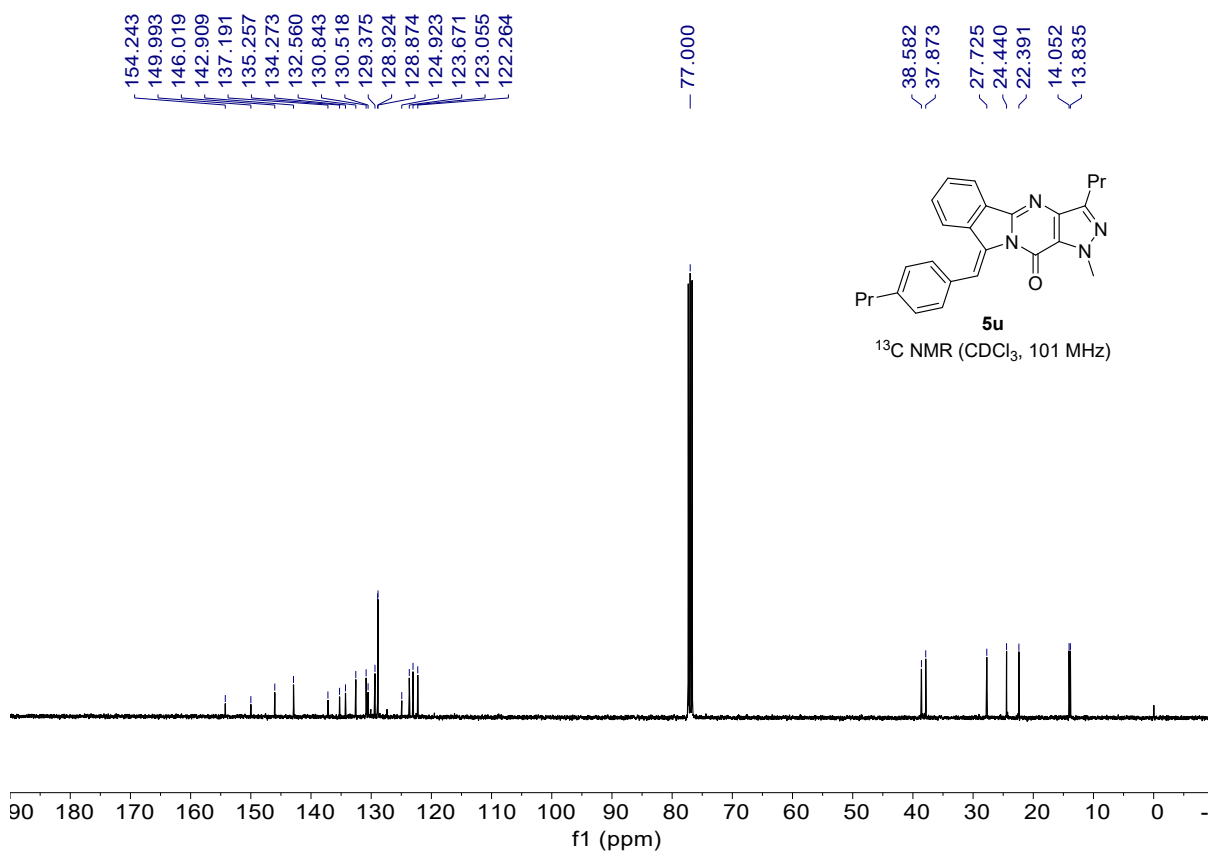



**(E)-9-(4-butylbenzylidene)-1-methyl-3-propyl-1,9-dihydro-11H-pyrazolo[4',3':4,5]pyrimido[2,1-a]isoindol-11-one (5v)**

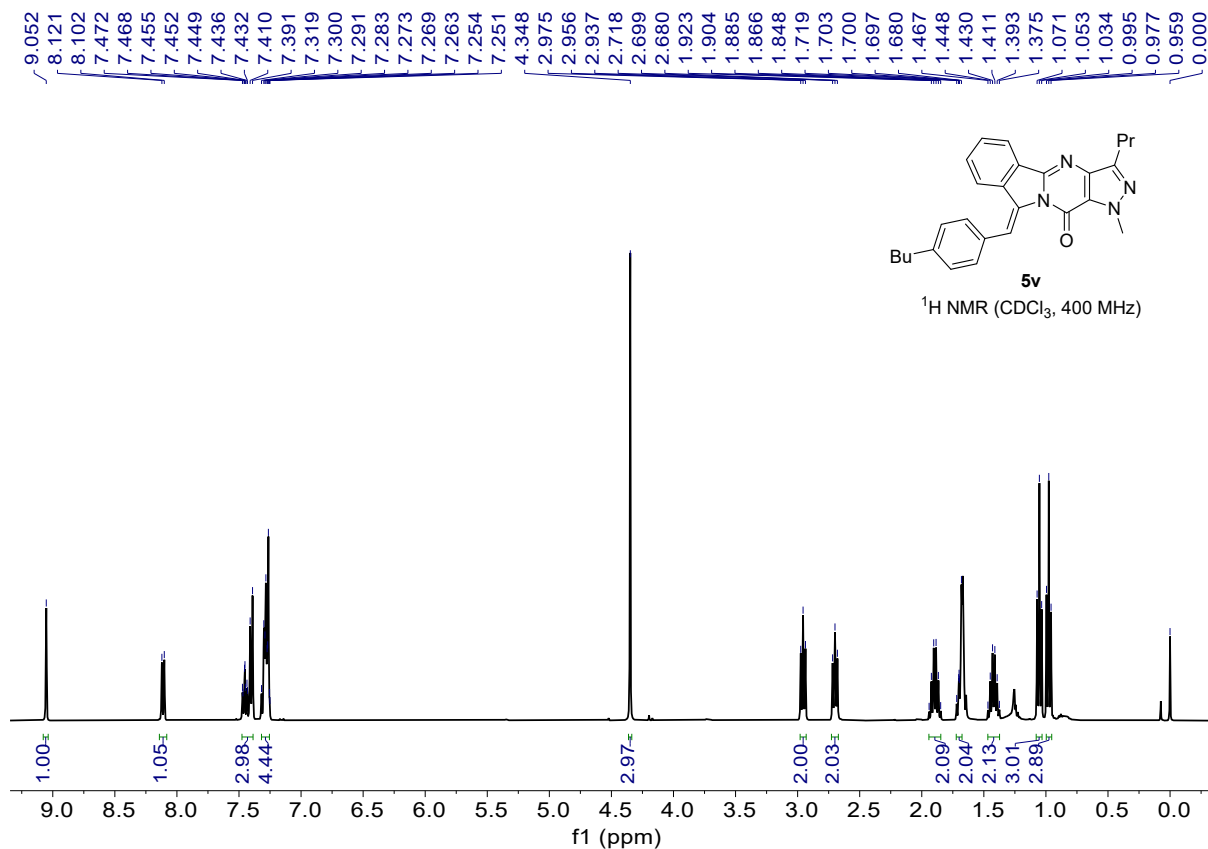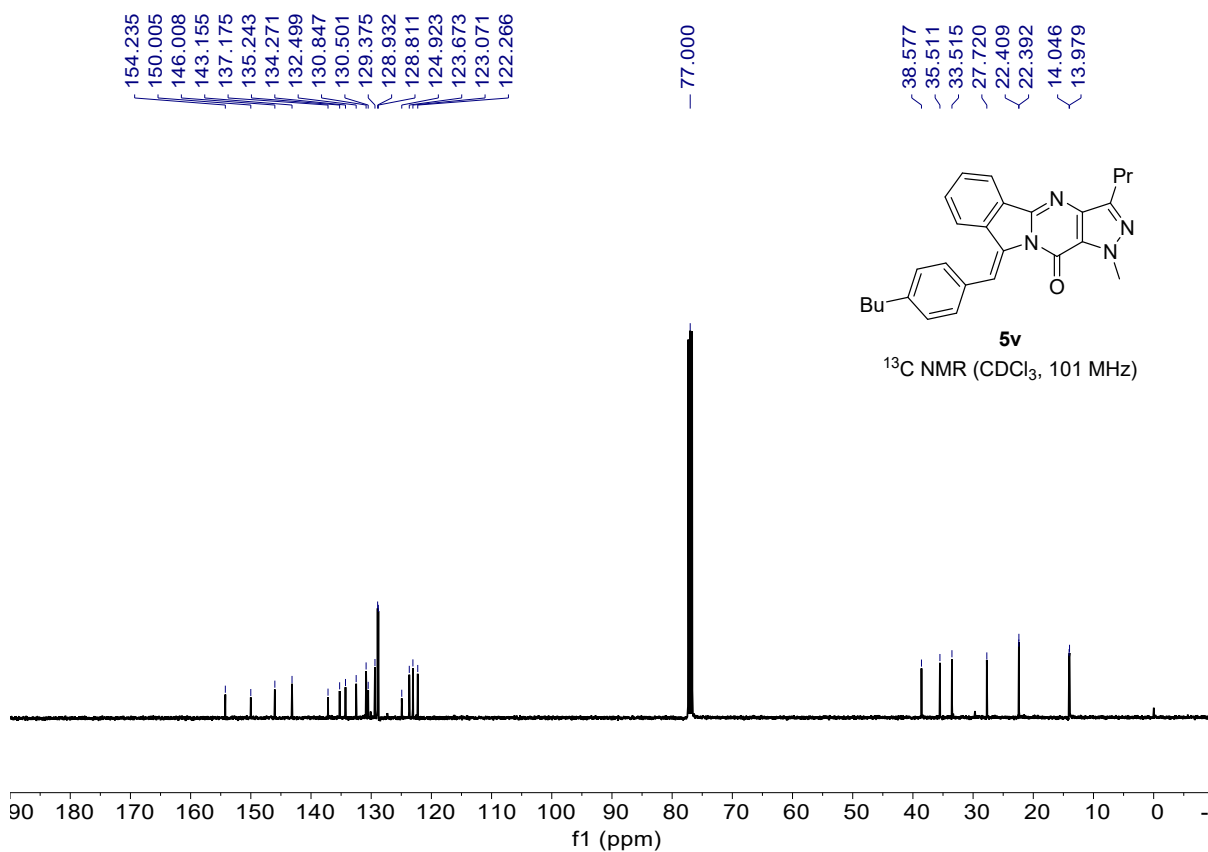

**(E)-1-methyl-9-(4-pentylbenzylidene)-3-propyl-1,9-dihydro-11H-pyrazolo[4',3':4,5]pyrimido[2,1-*a*]isoindol-11-one (5w)**

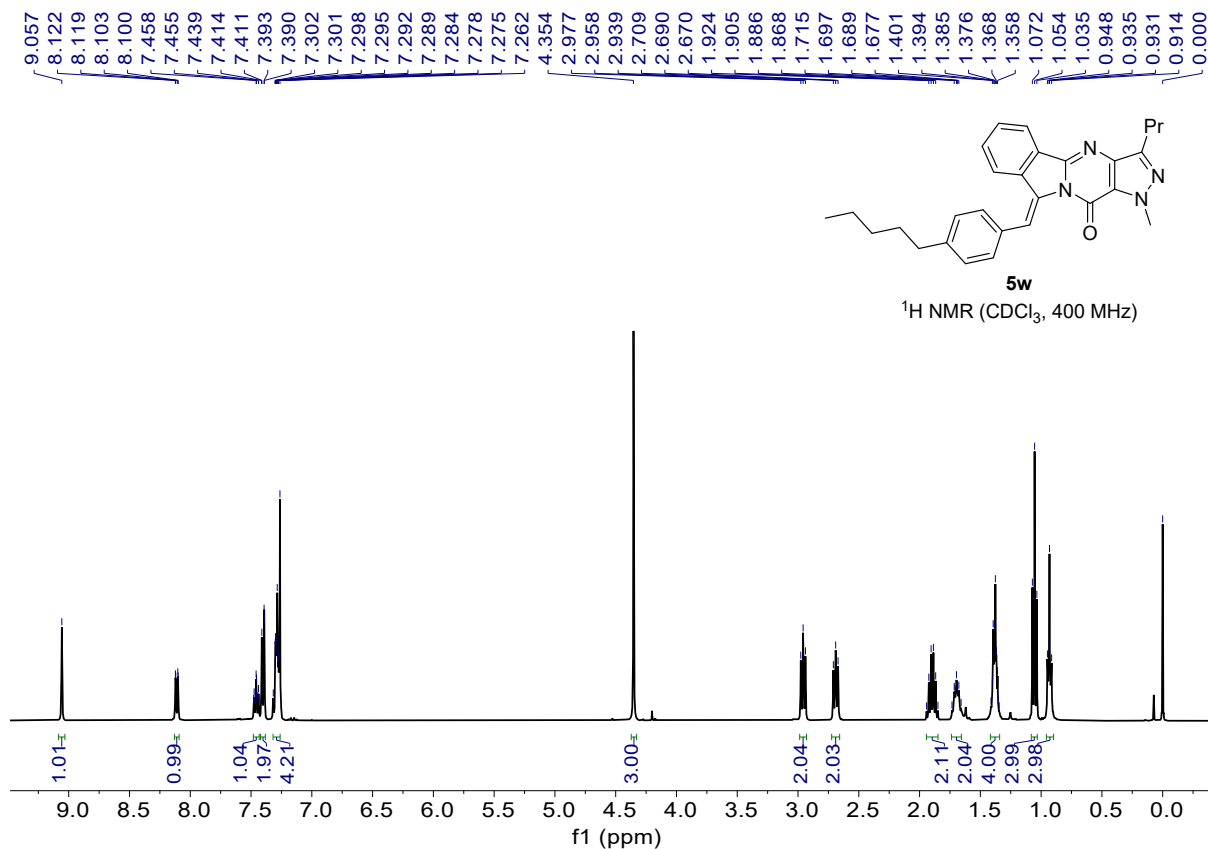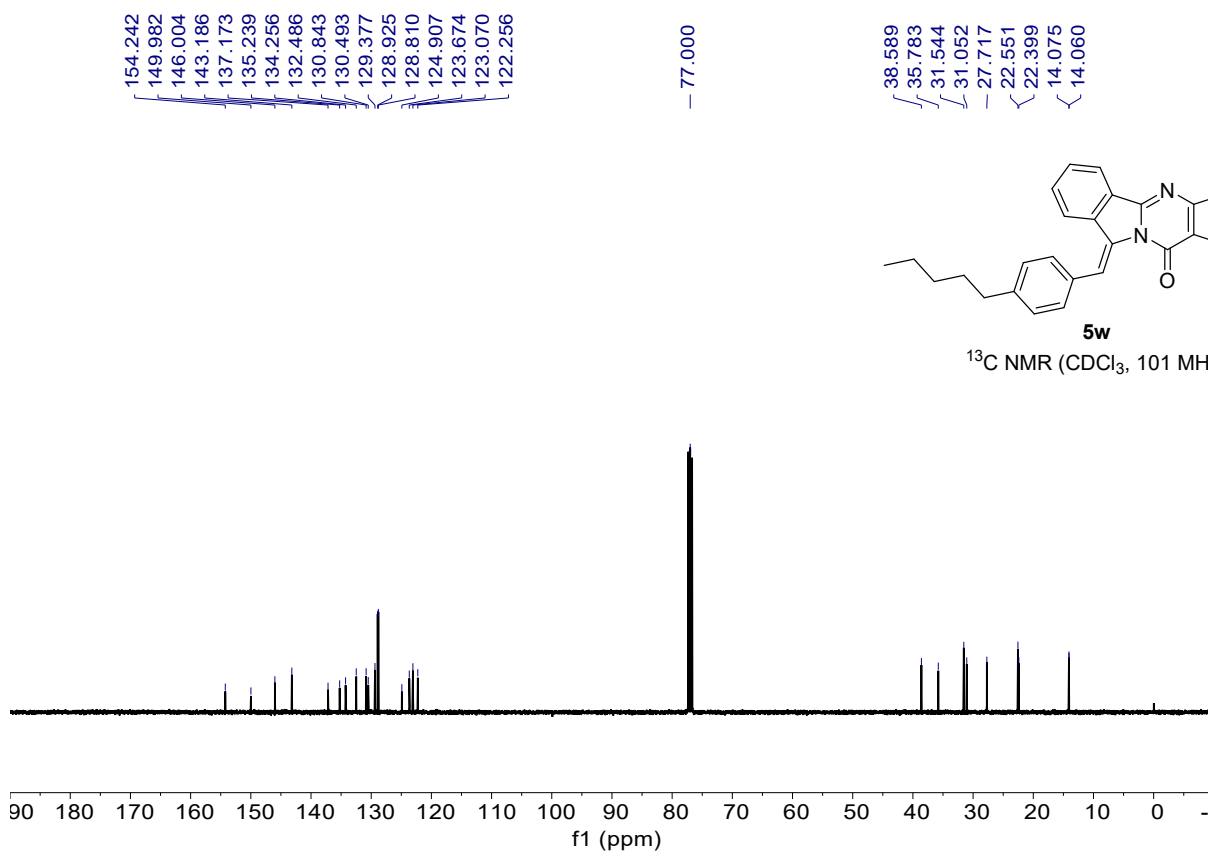

**(E)-9-(2-fluorobenzylidene)-1-methyl-3-propyl-1,9-dihydro-11H-pyrazolo[4',3':4,5]pyrimido[2,1-a]isoindol-11-one (5x)**

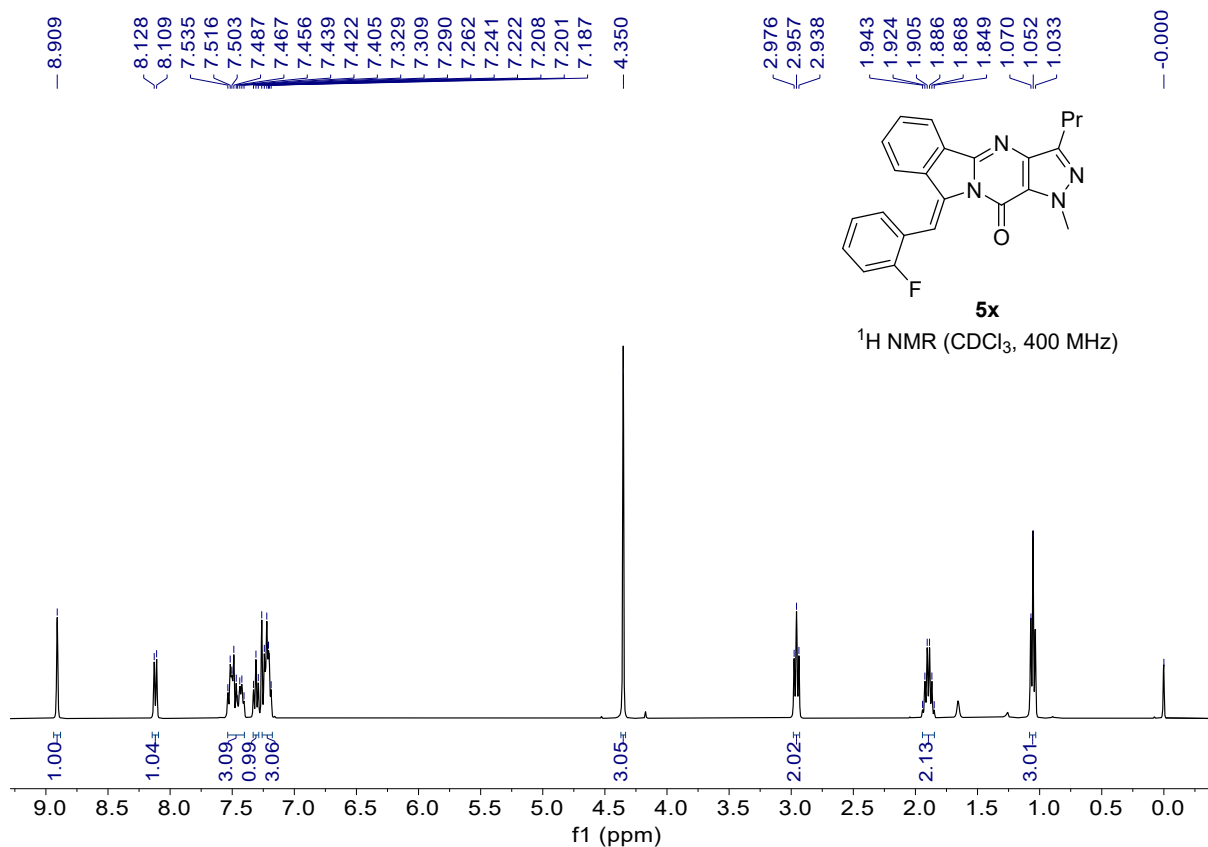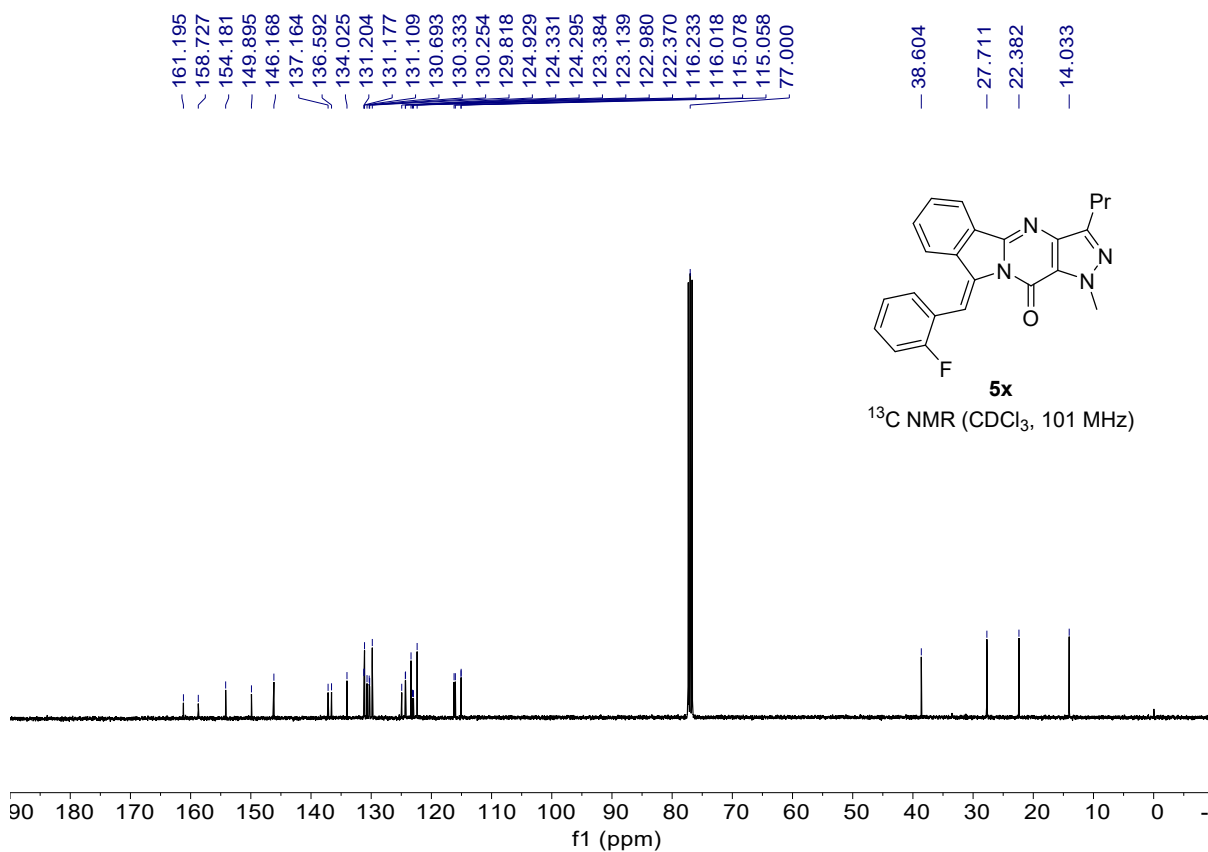

**(E)-9-(2-chlorobenzylidene)-1-methyl-3-propyl-1,9-dihydro-11H-pyrazolo[4',3':4,5]pyrimido[2,1-a]isoindol-11-one (5y)**

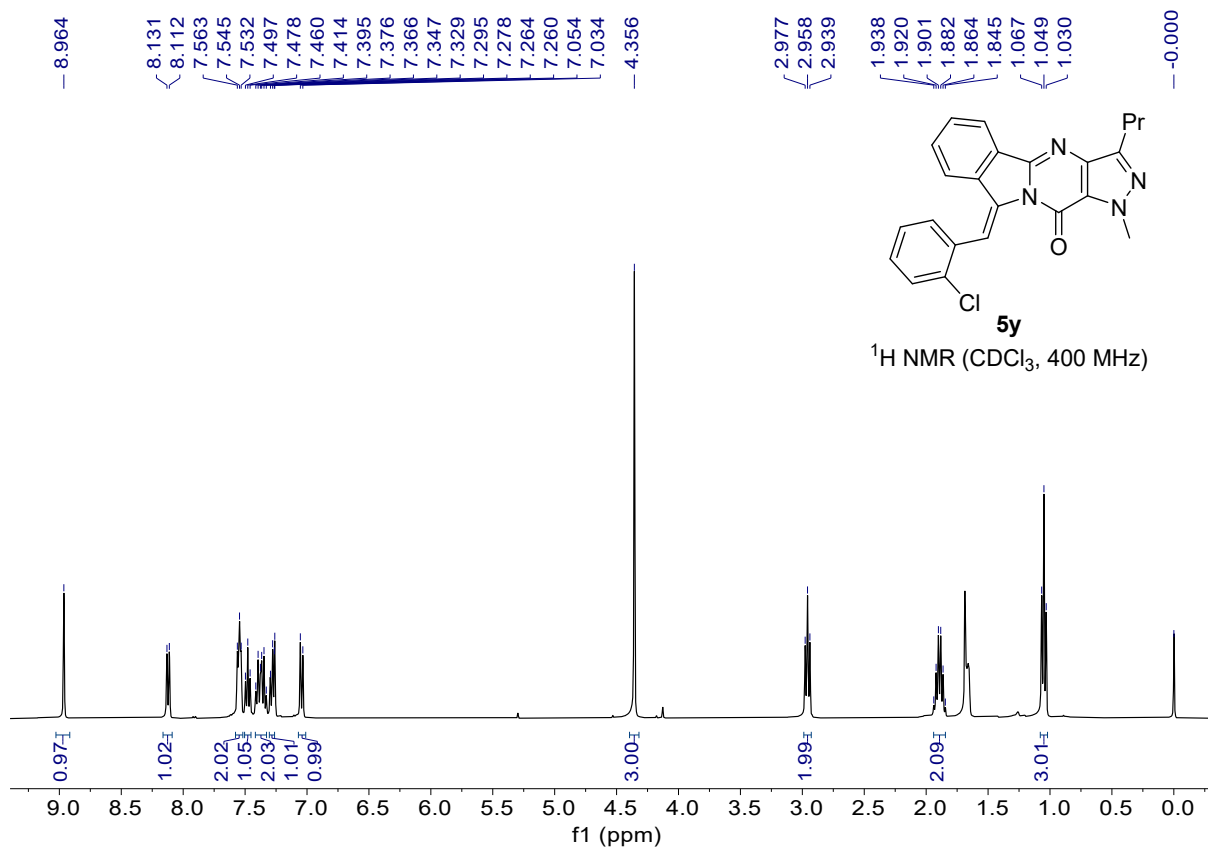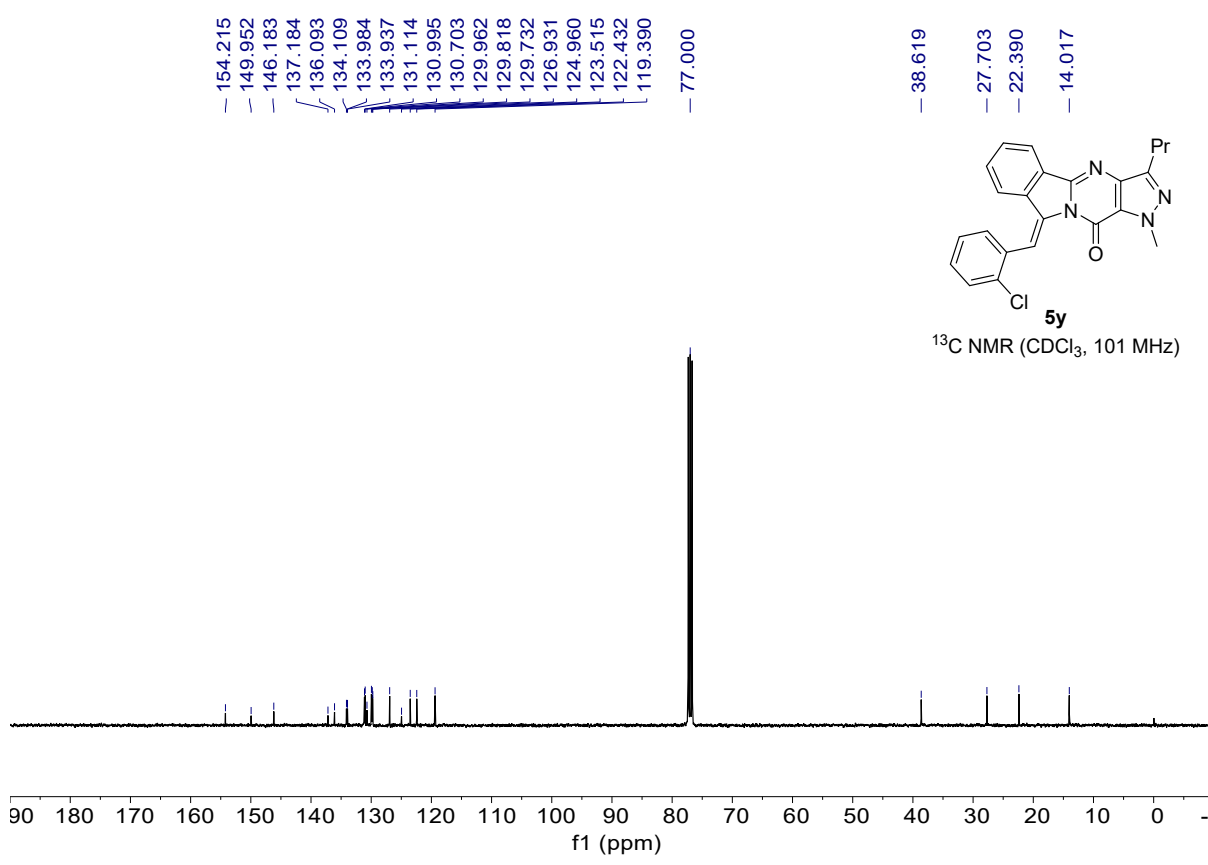

**(E)-1-methyl-9-(2-methylbenzylidene)-3-propyl-1,9-dihydro-11H-pyrazolo[4',3':4,5]pyrimido[2,1-a]isoindol-11-one (5z)**

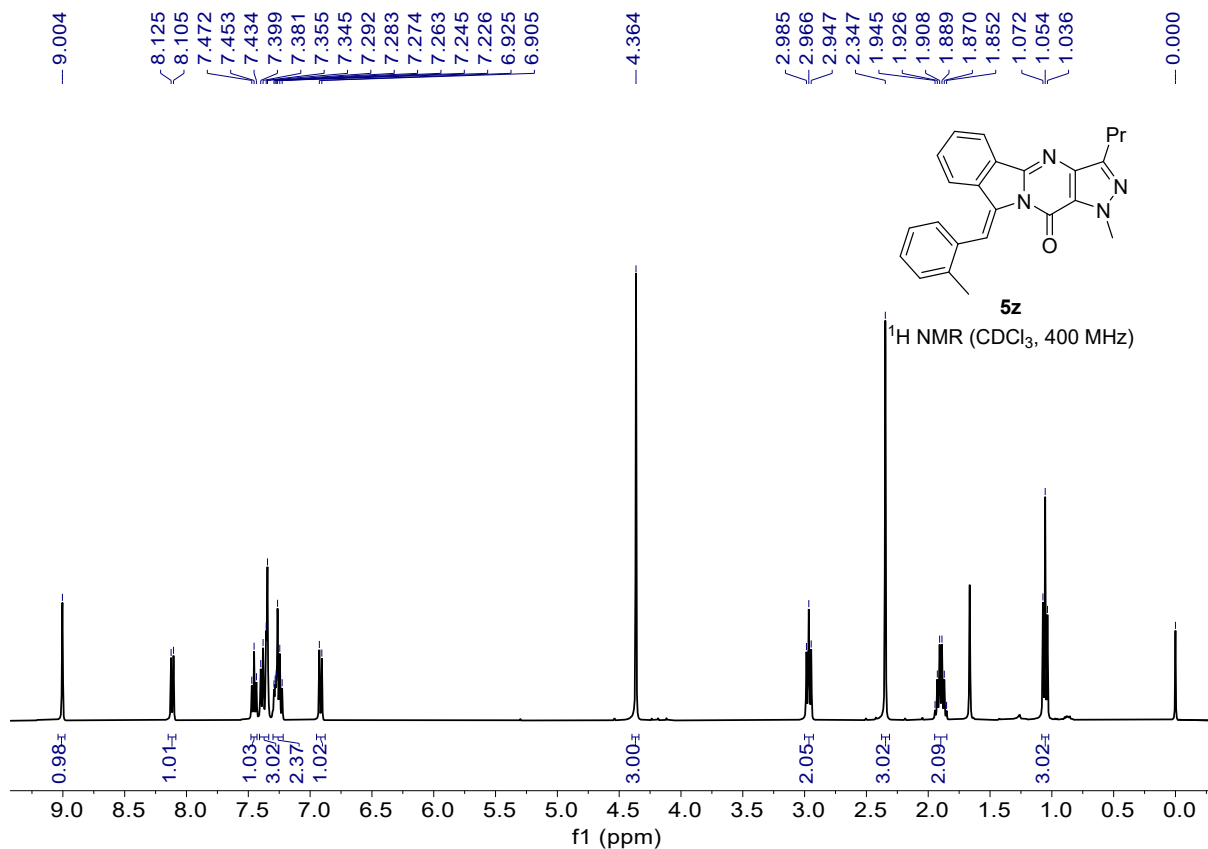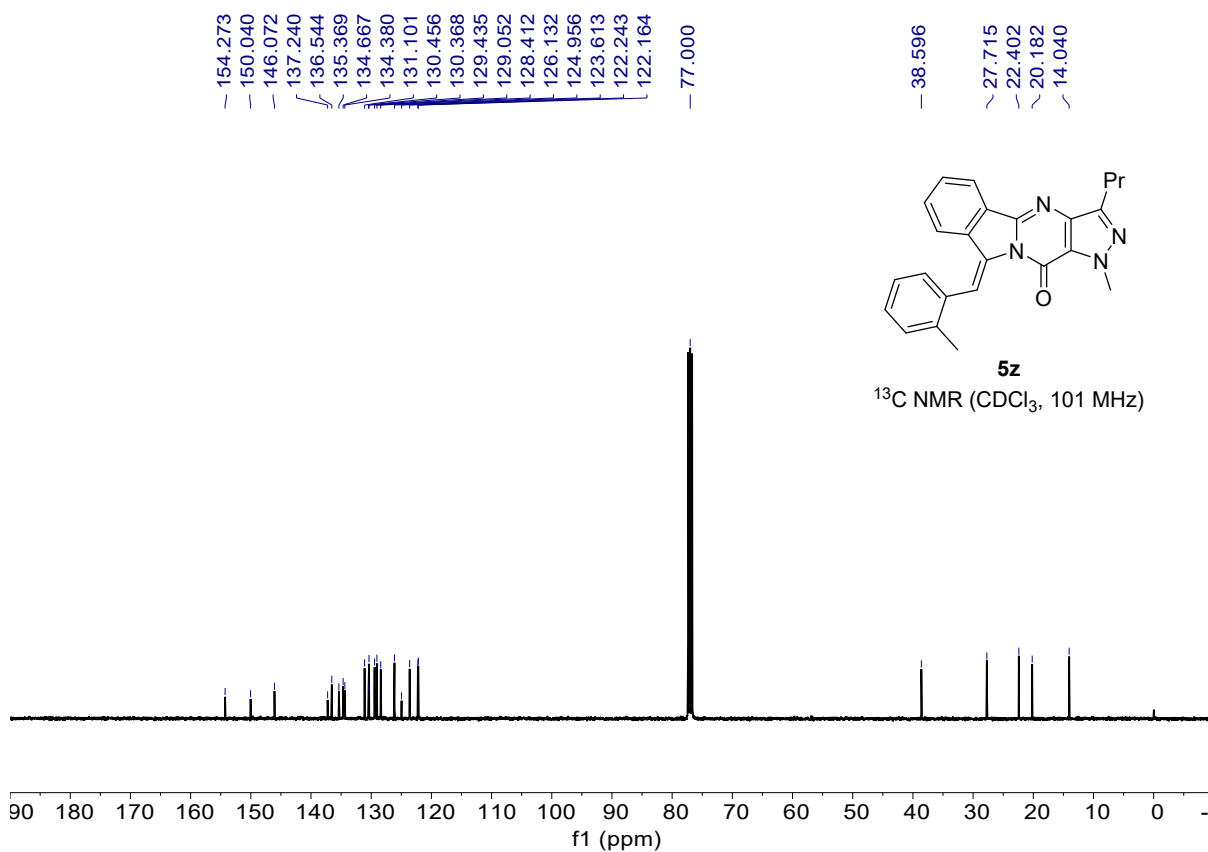

**(E)-9-(2-methoxybenzylidene)-1-methyl-3-propyl-1,9-dihydro-11H-pyrazolo[4',3':4,5]pyrimido[2,1-a]isoindol-11-one (5aa)**

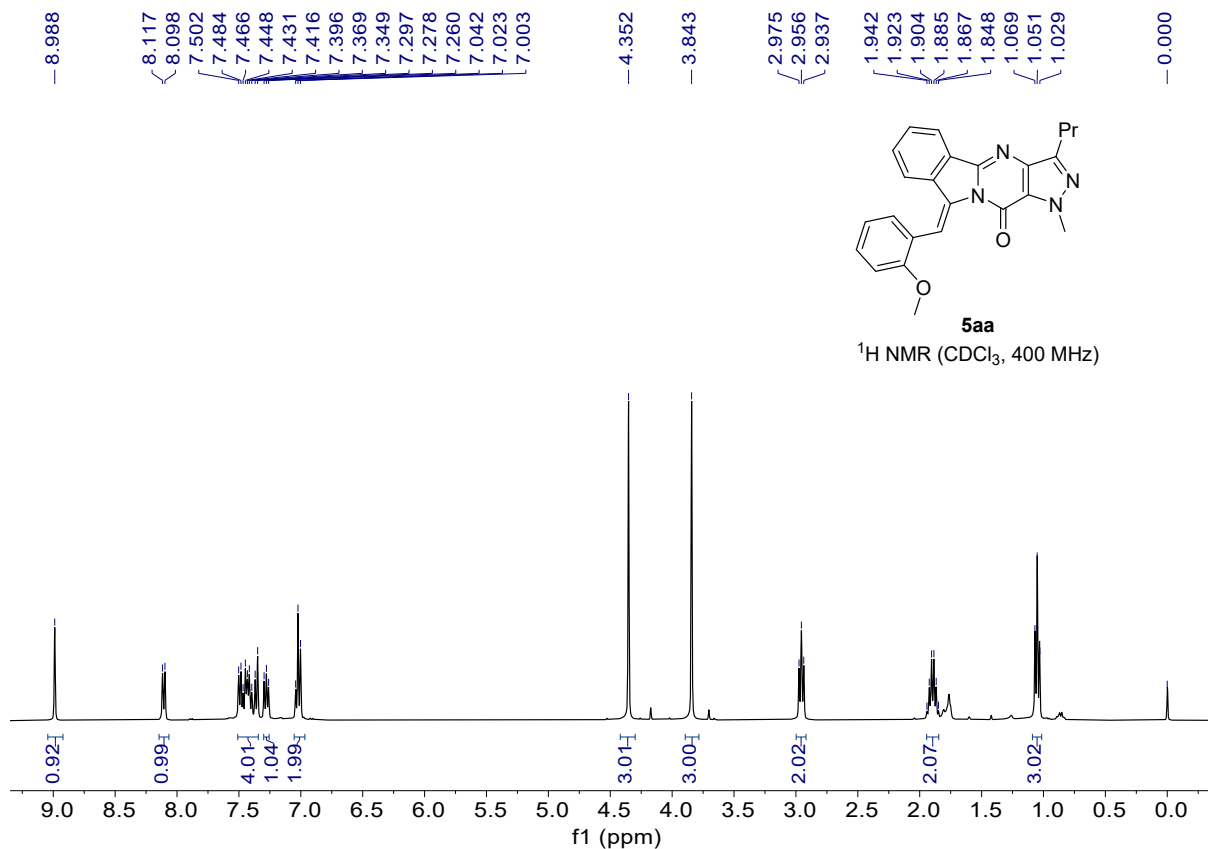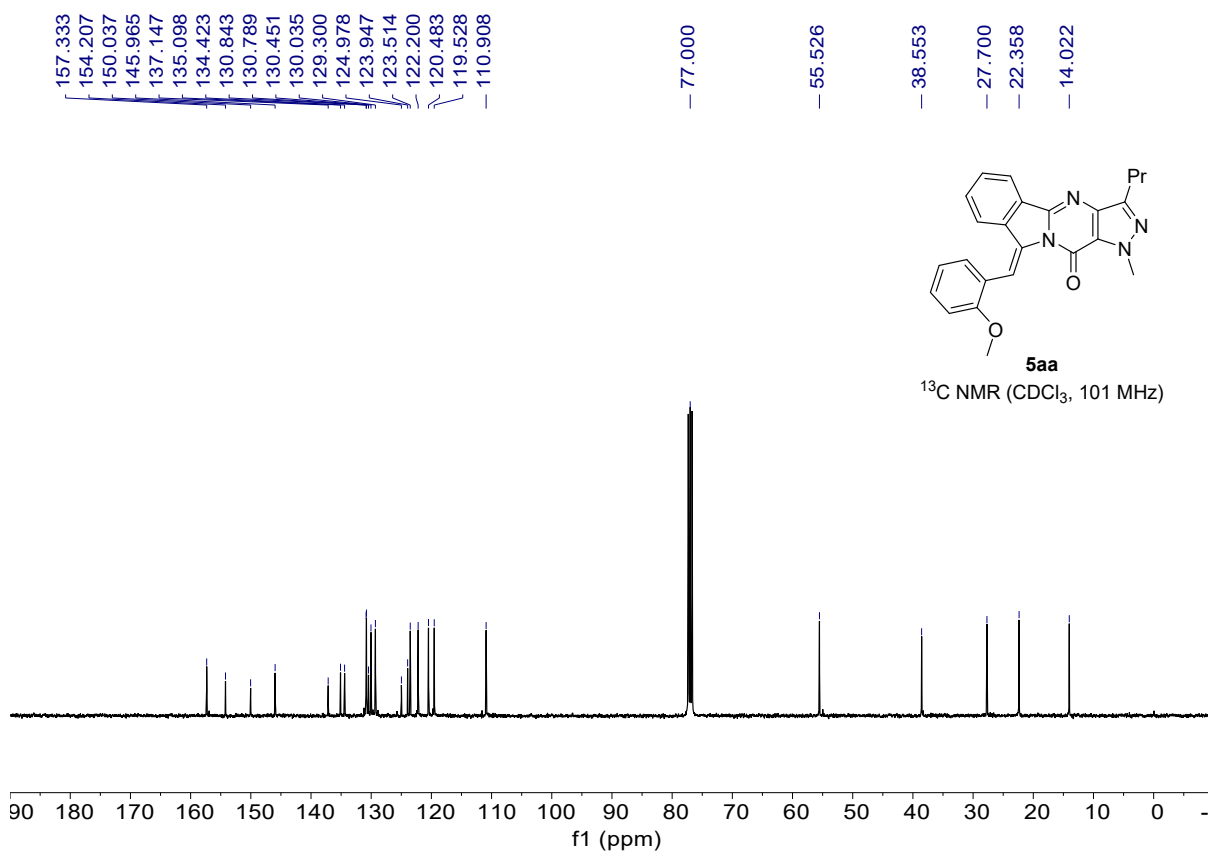

**(E)-9-(3-fluorobenzylidene)-1-methyl-3-propyl-1,9-dihydro-11H-pyrazolo[4',3':4,5]pyrimido[2,1-a]isoindol-11-one (5ab)**

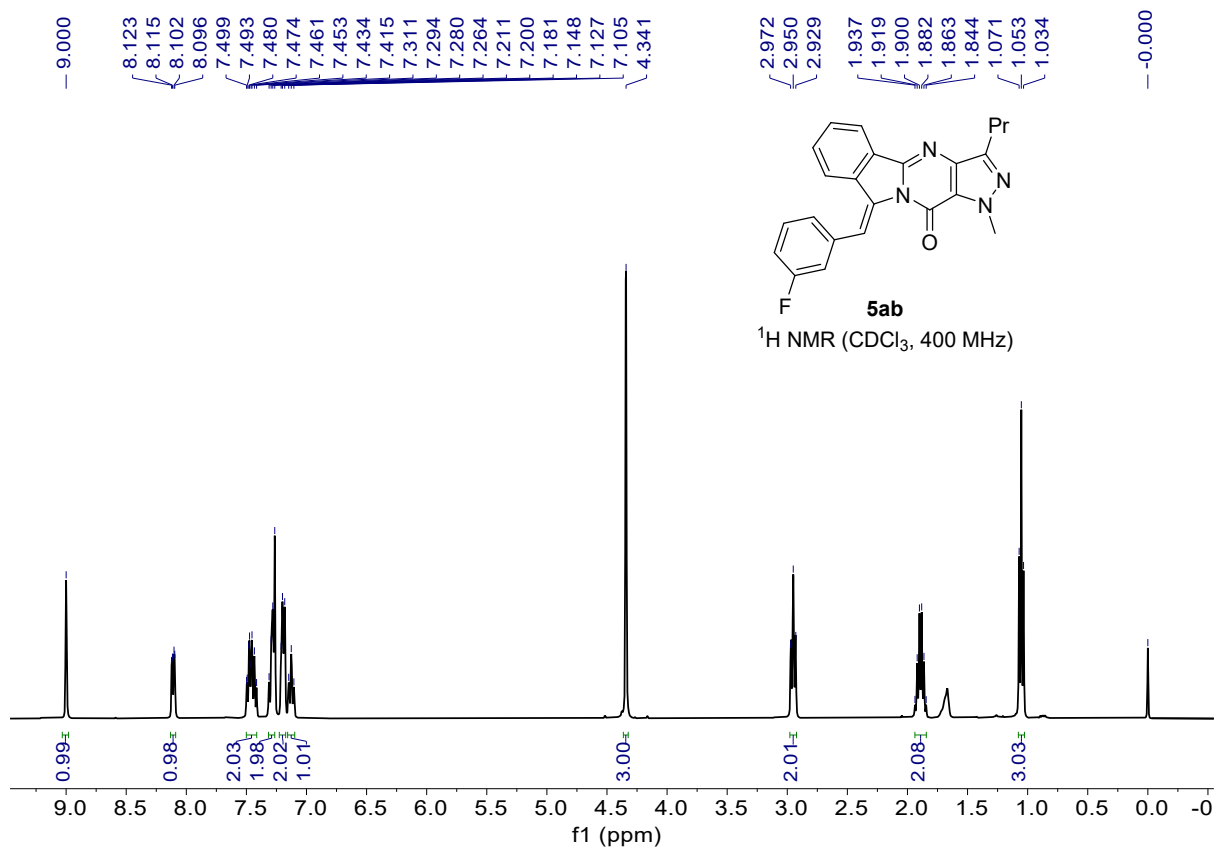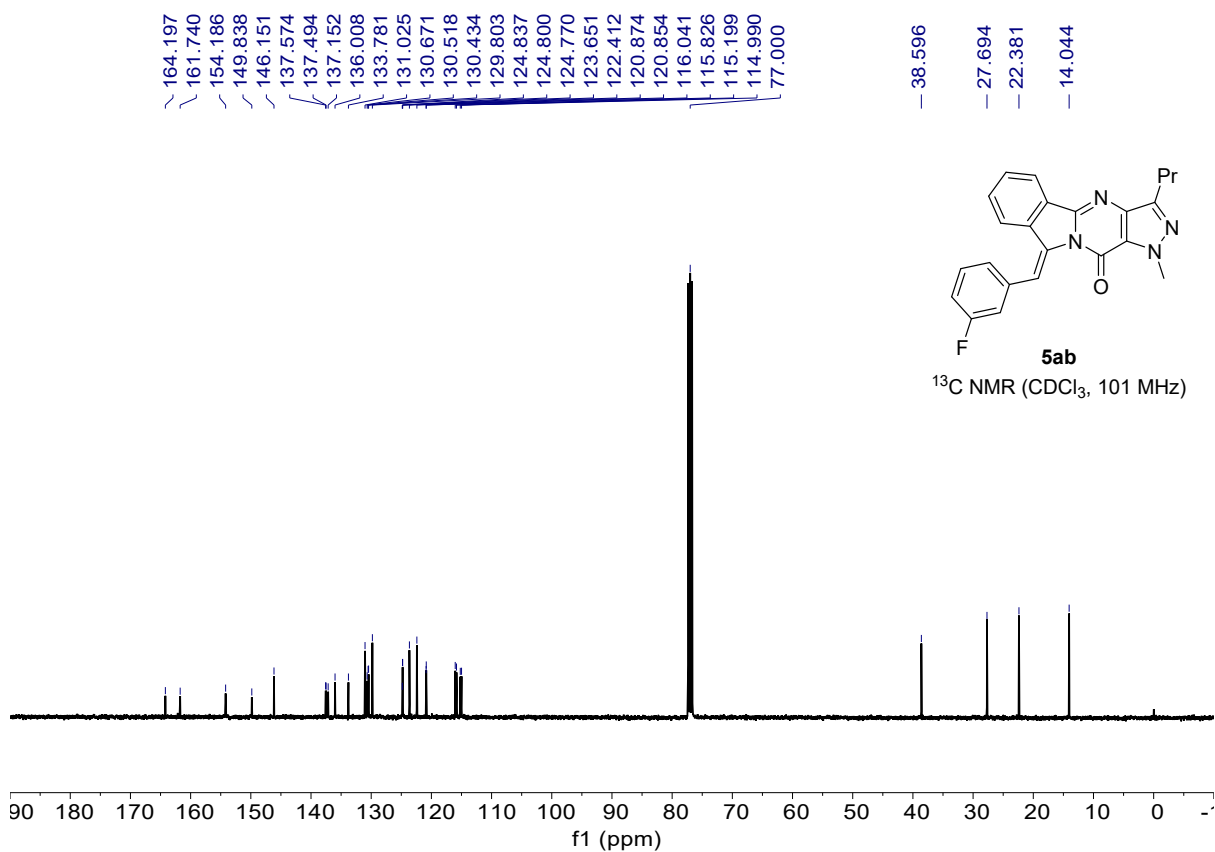

**(E)-9-(3-chlorobenzylidene)-1-methyl-3-propyl-1,9-dihydro-11H-pyrazolo[4',3':4,5]pyrimido[2,1-a]isoindol-11-one (5ac)**

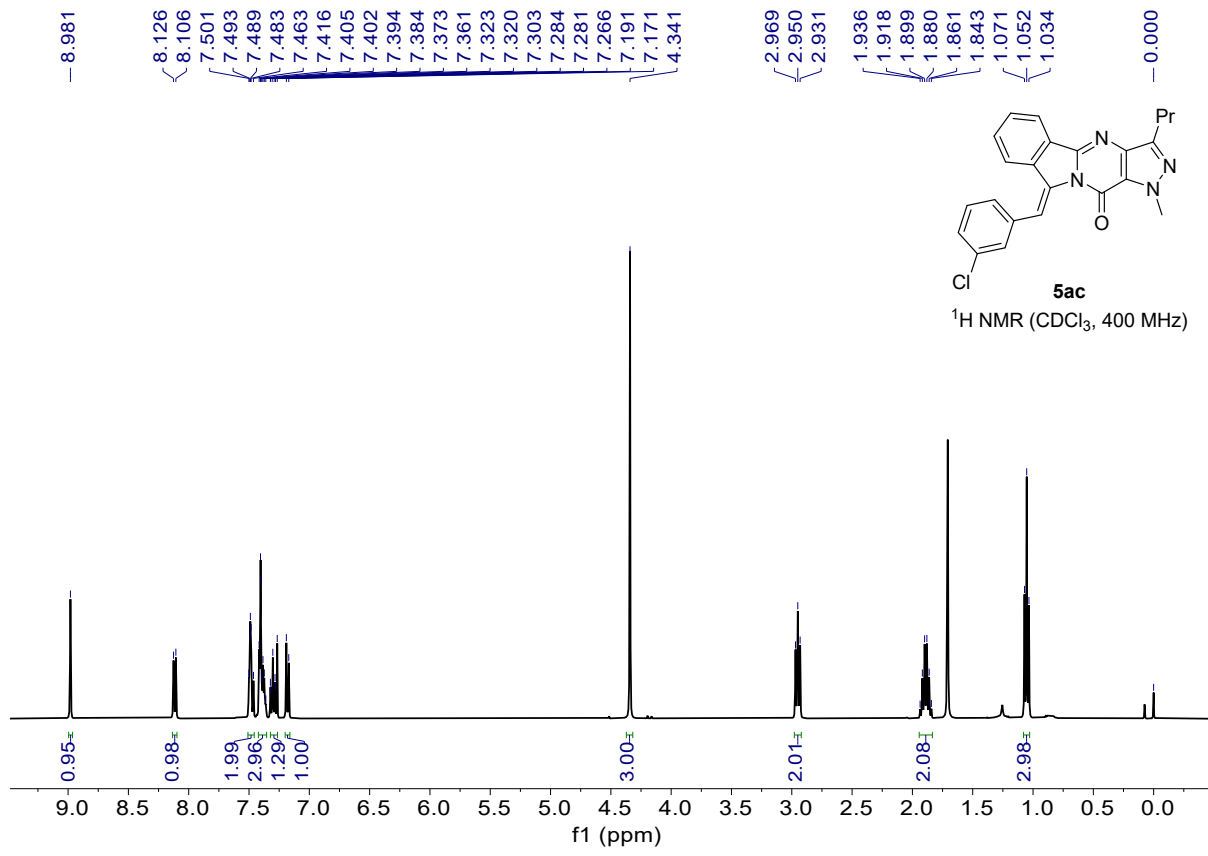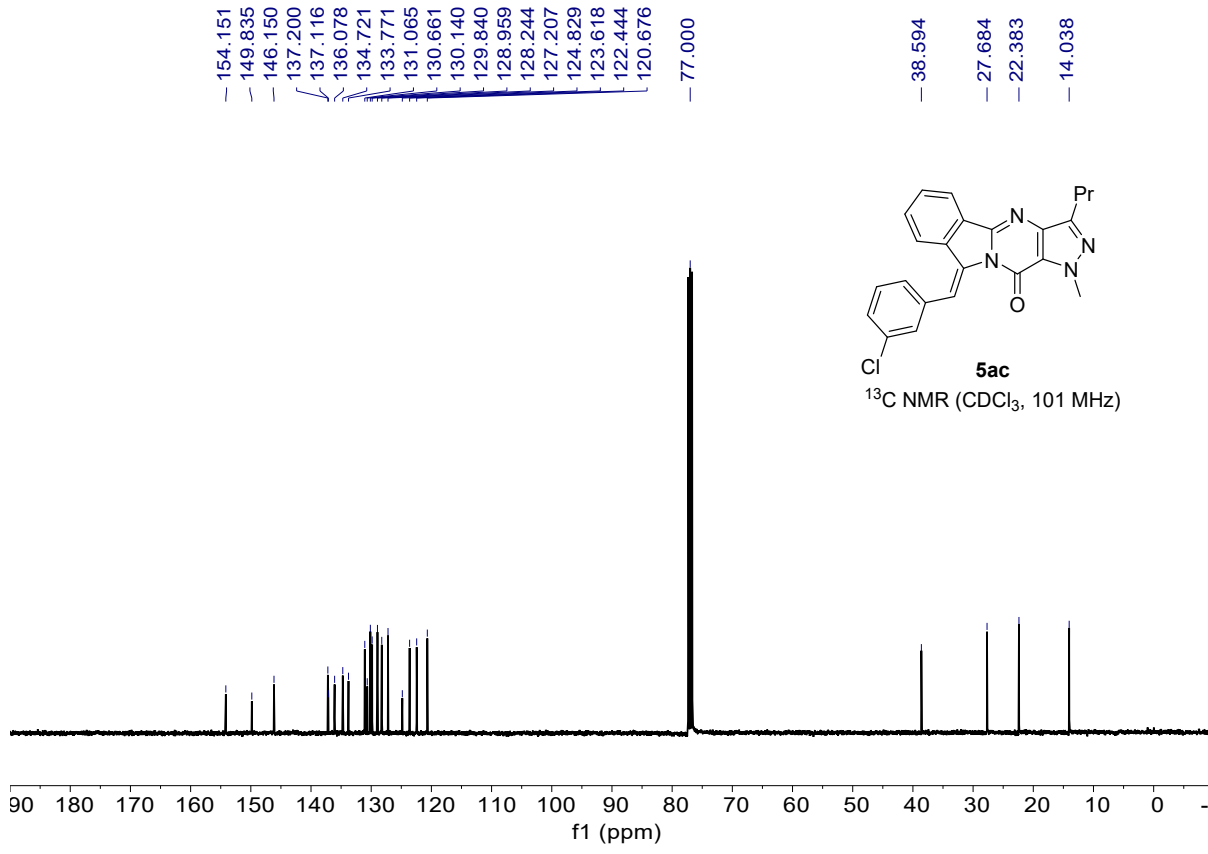



**(E)-1-methyl-9-(3-methylbenzylidene)-3-propyl-1,9-dihydro-11H-pyrazolo[4',3':4,5]pyrimido[2,1-*a*]isoindol-11-one (5ad)**

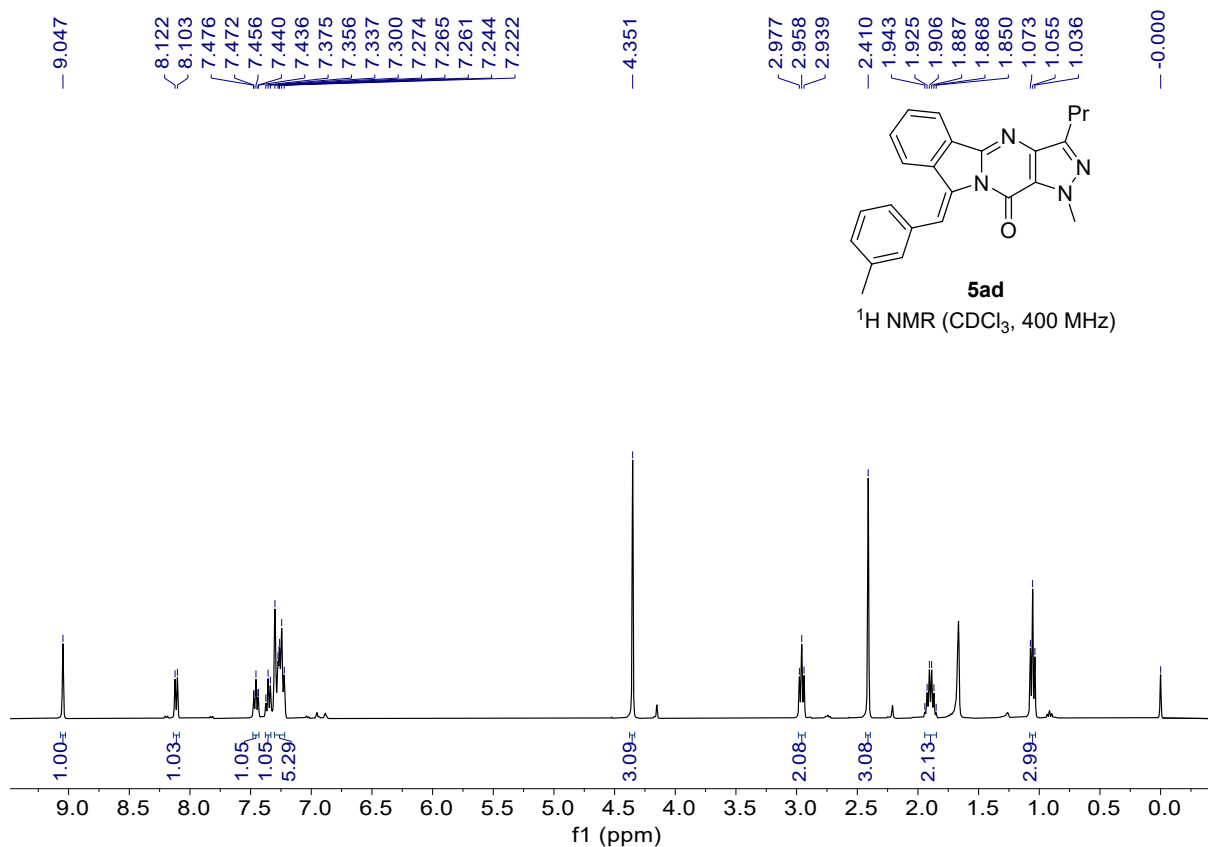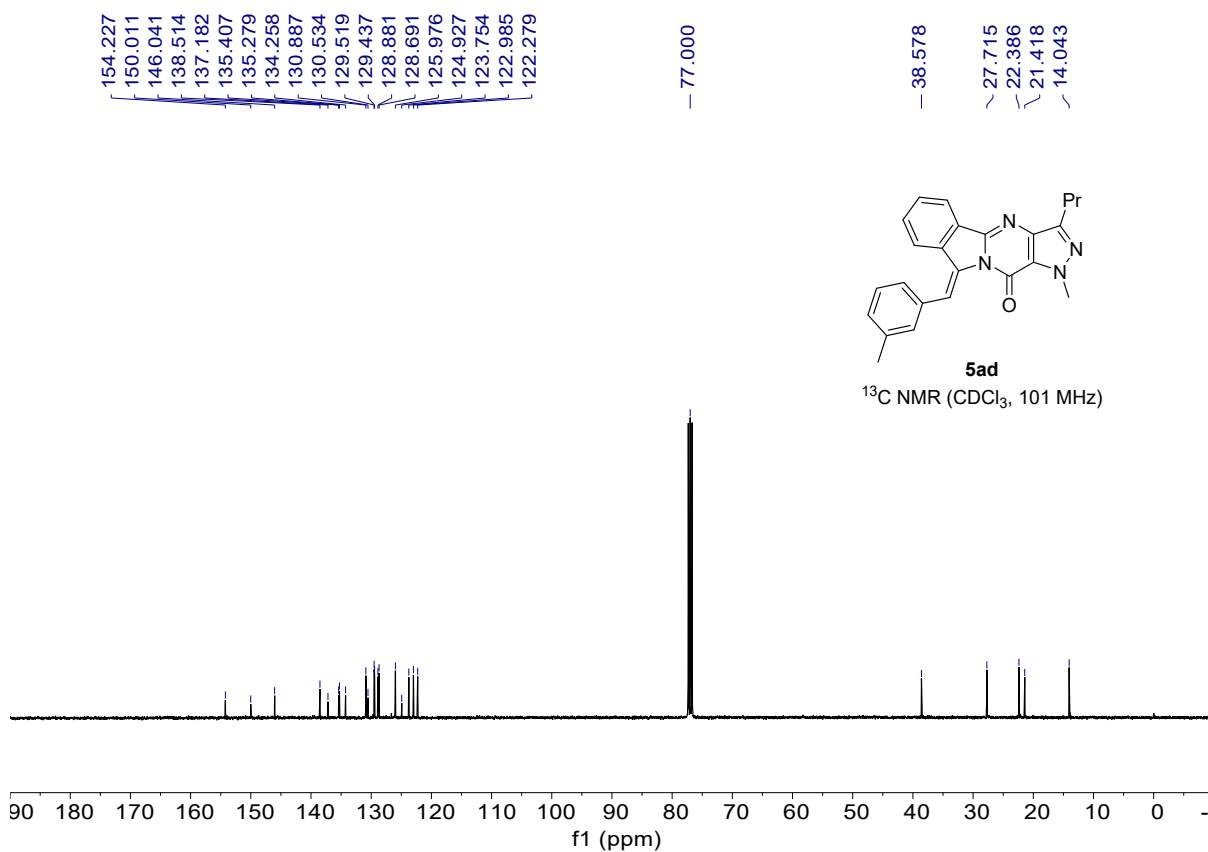

**(E)-9-(3-methoxybenzylidene)-1-methyl-3-propyl-1,9-dihydro-11H-pyrazolo[4',3':4,5]pyrimido[2,1-a]isoindol-11-one (5ae)**

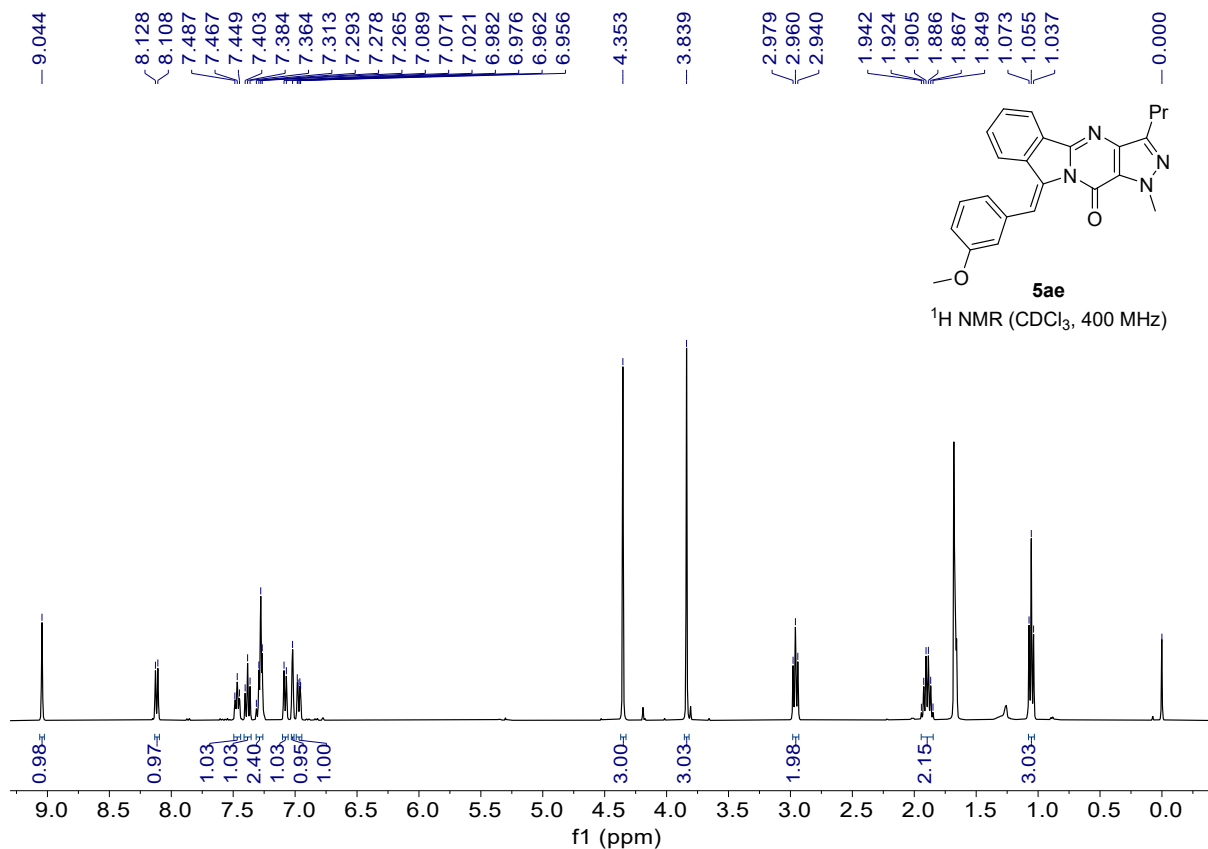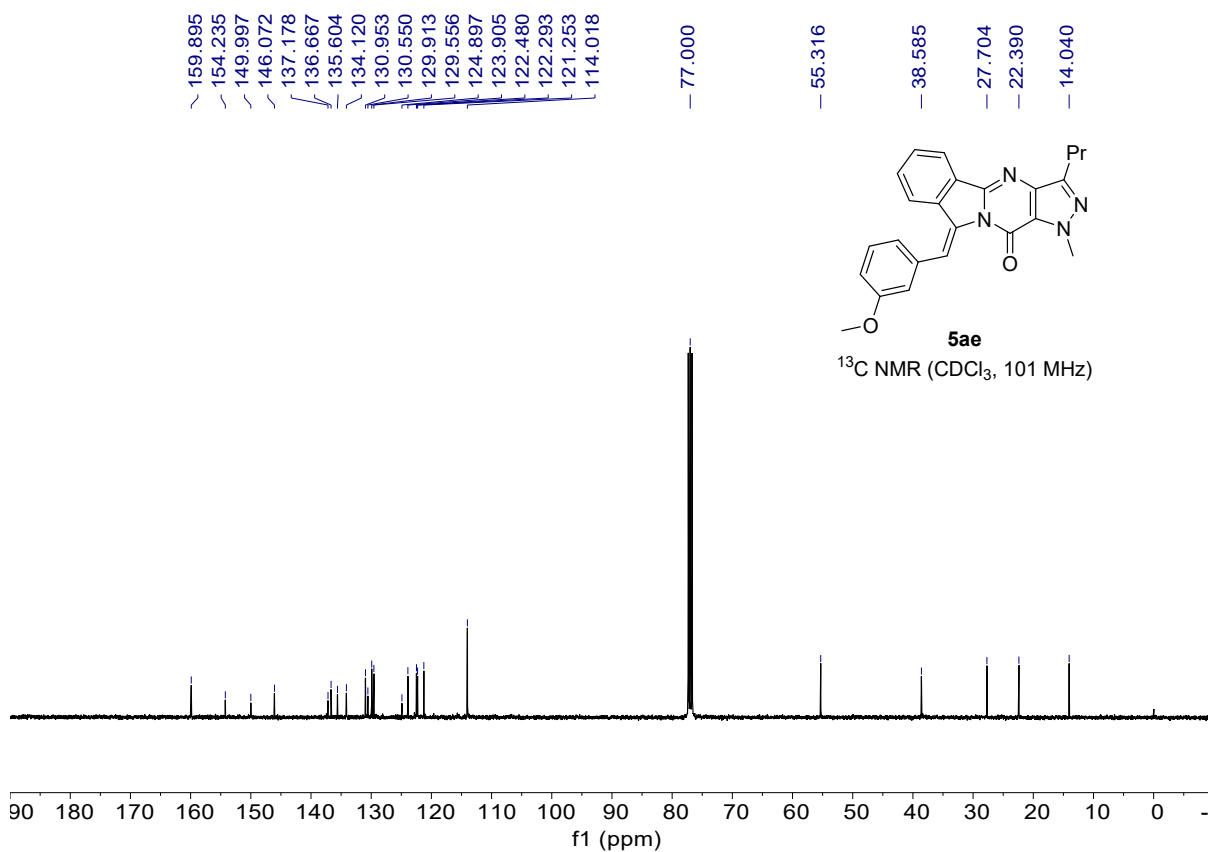

**(E)-11-benzylidene-8-methoxy-2,3,4,11-tetrahydrobenzo[4',5']thieno[2',3':4,5]pyrimido[2,1-*a*]isoindol-13(1*H*)-one (5af)**

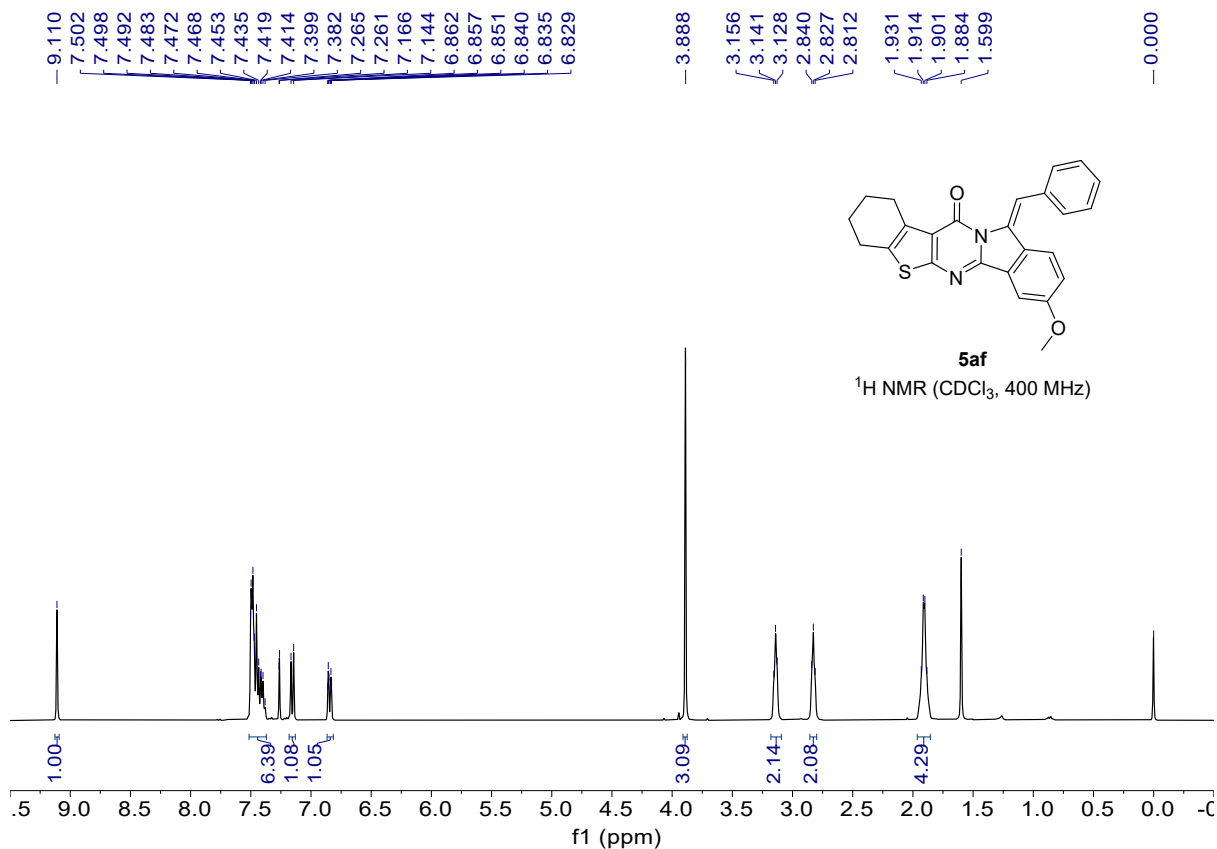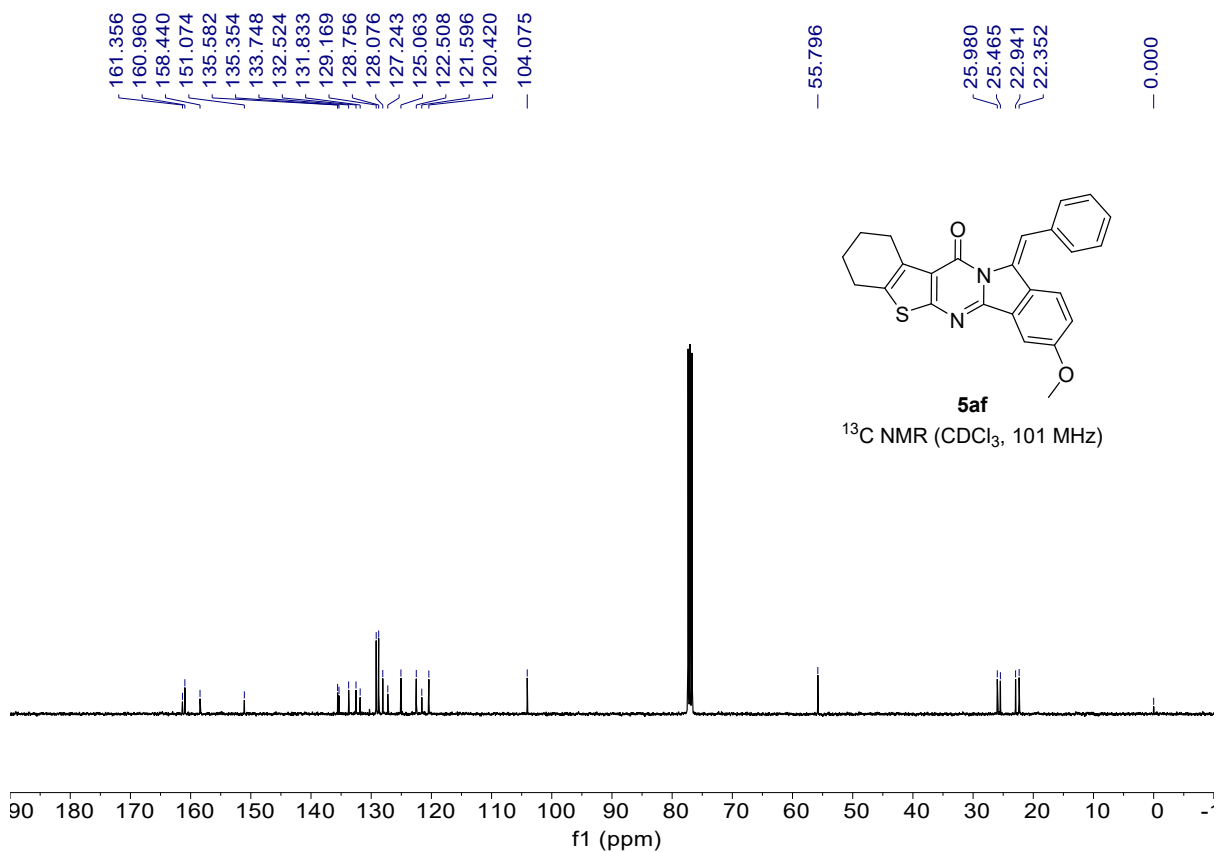

**(Z)-9-benzylidene-1-methyl-3-propyl-1,9-dihydro-11H-pyrazolo[4',3':4,5]pyrimido[2,1-a]isoindol-11-one (6a)**

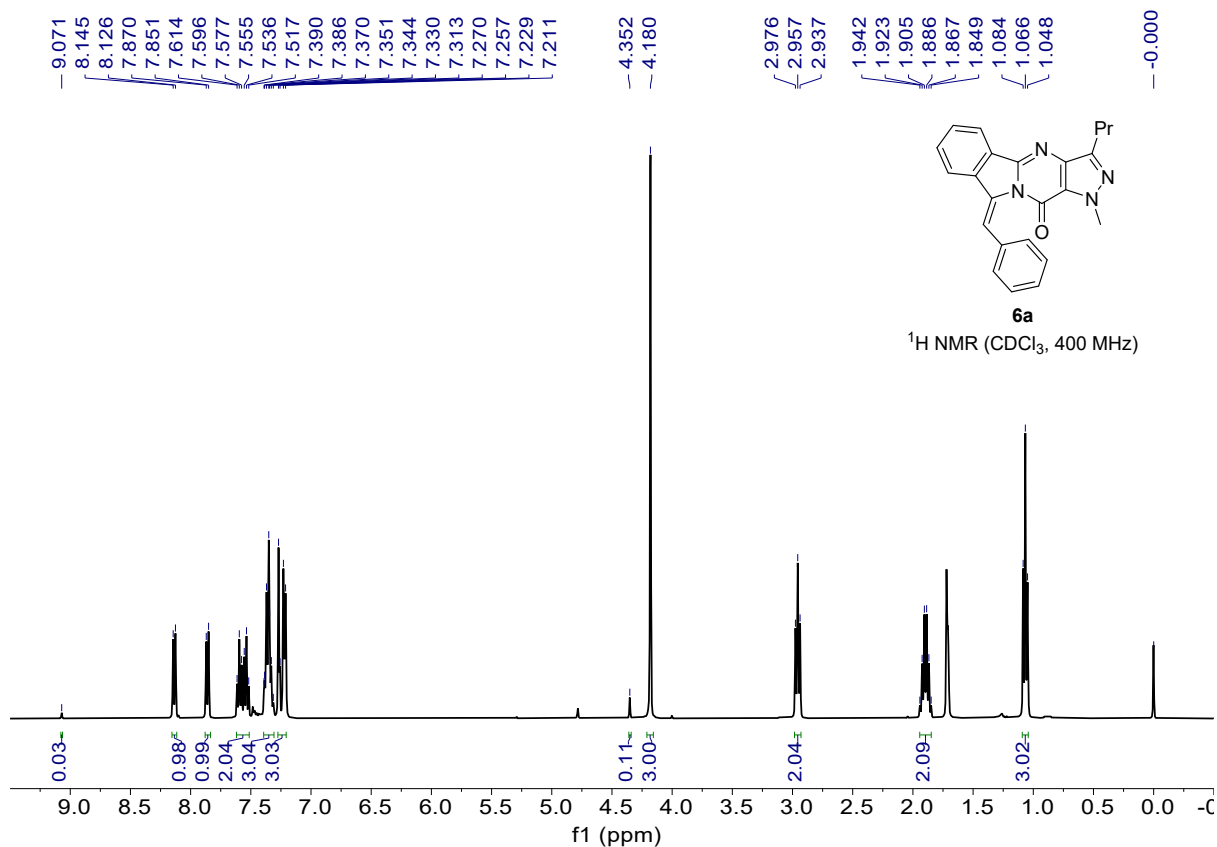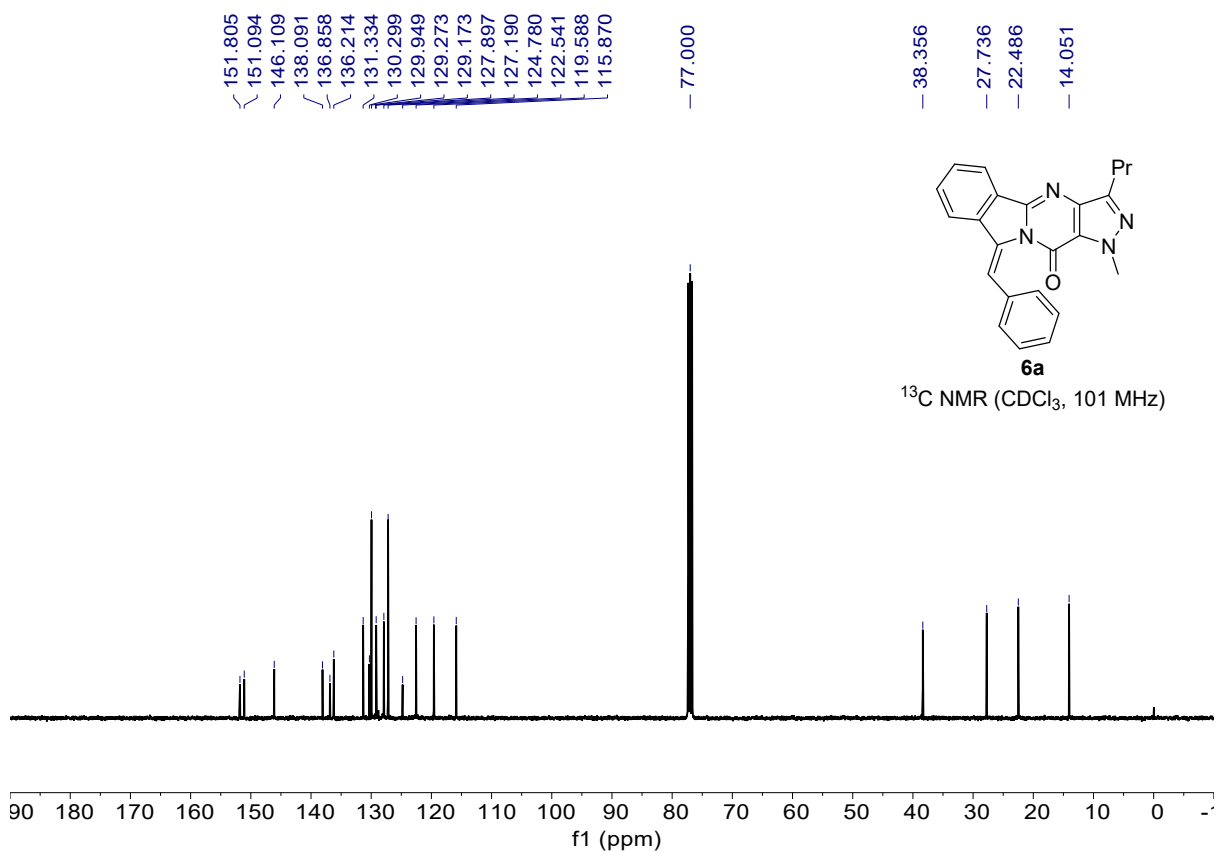

**(Z)-9-benzylidene-7-fluoro-1-methyl-3-propyl-1,9-dihydro-11H-pyrazolo[4',3':4,5]pyrimido[2,1-a]isoindol-11-one (6b)**

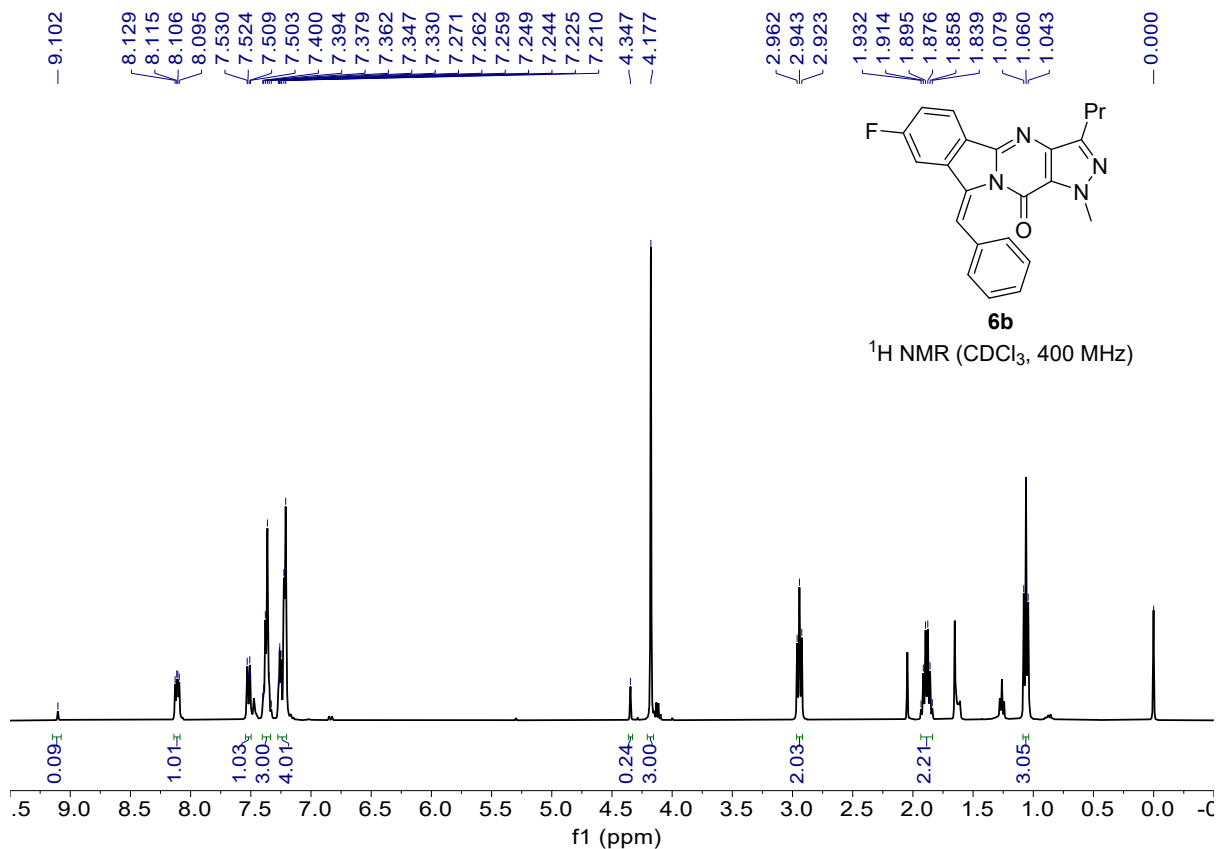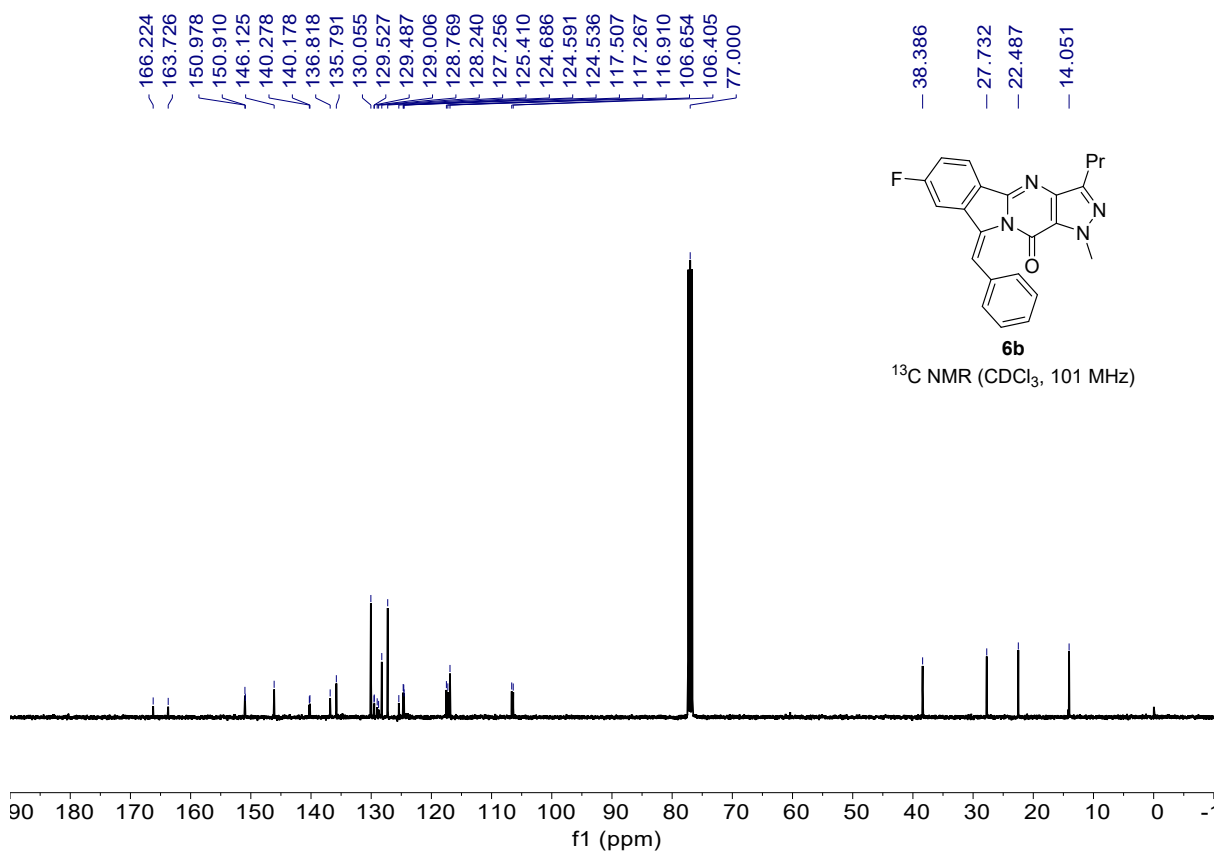

**(Z)-9-benzylidene-7-chloro-1-methyl-3-propyl-1,9-dihydro-11H-pyrazolo[4',3':4,5]pyrimido[2,1-a]isoindol-11-one (6c)**

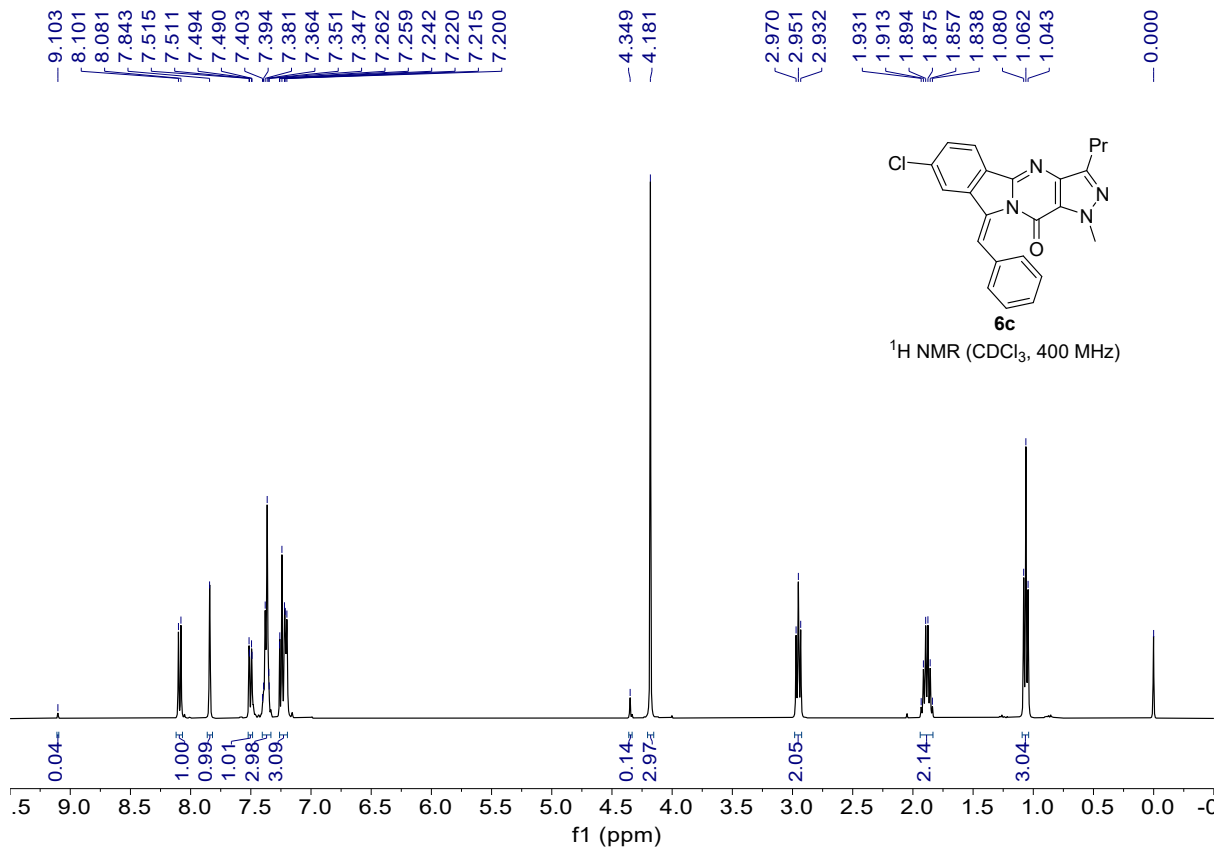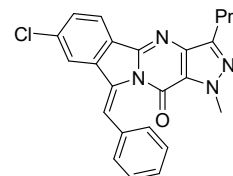

**<sup>1</sup>H NMR (CDCl<sub>3</sub>, 400 MHz)**

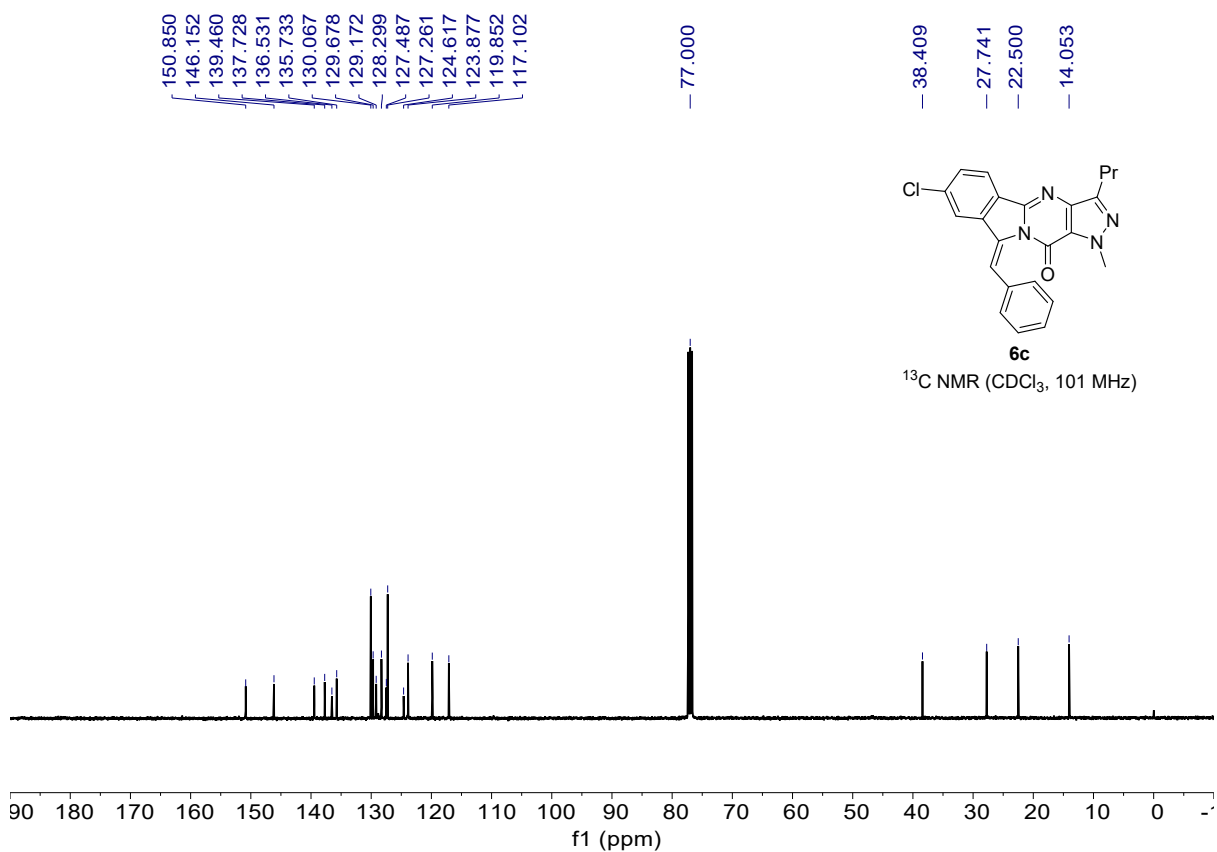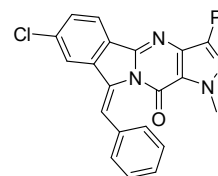

**<sup>13</sup>C NMR (CDCl<sub>3</sub>, 101 MHz)**

**(Z)-9-benzylidene-1,7-dimethyl-3-propyl-1,9-dihydro-11H-pyrazolo[4',3':4,5]pyrimido[2,1-a]isoindol-11-one (6d)**

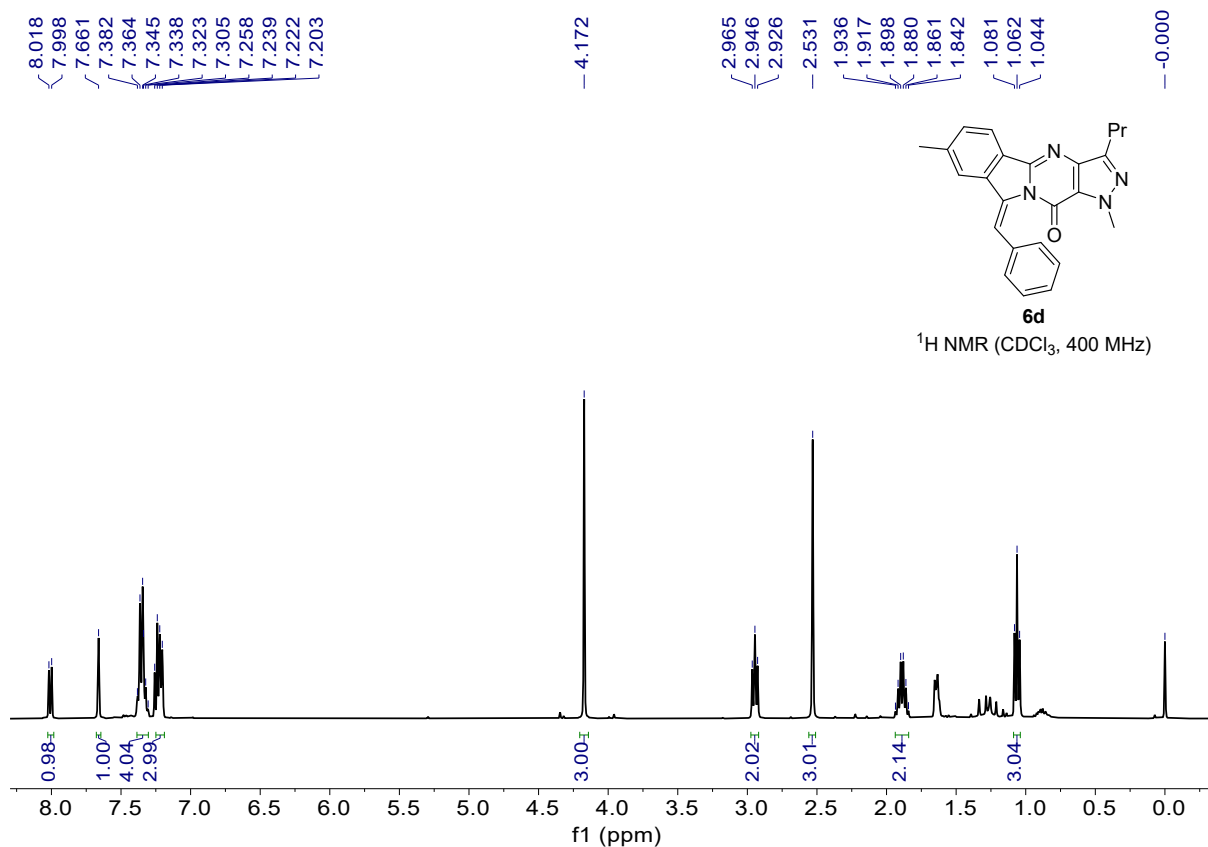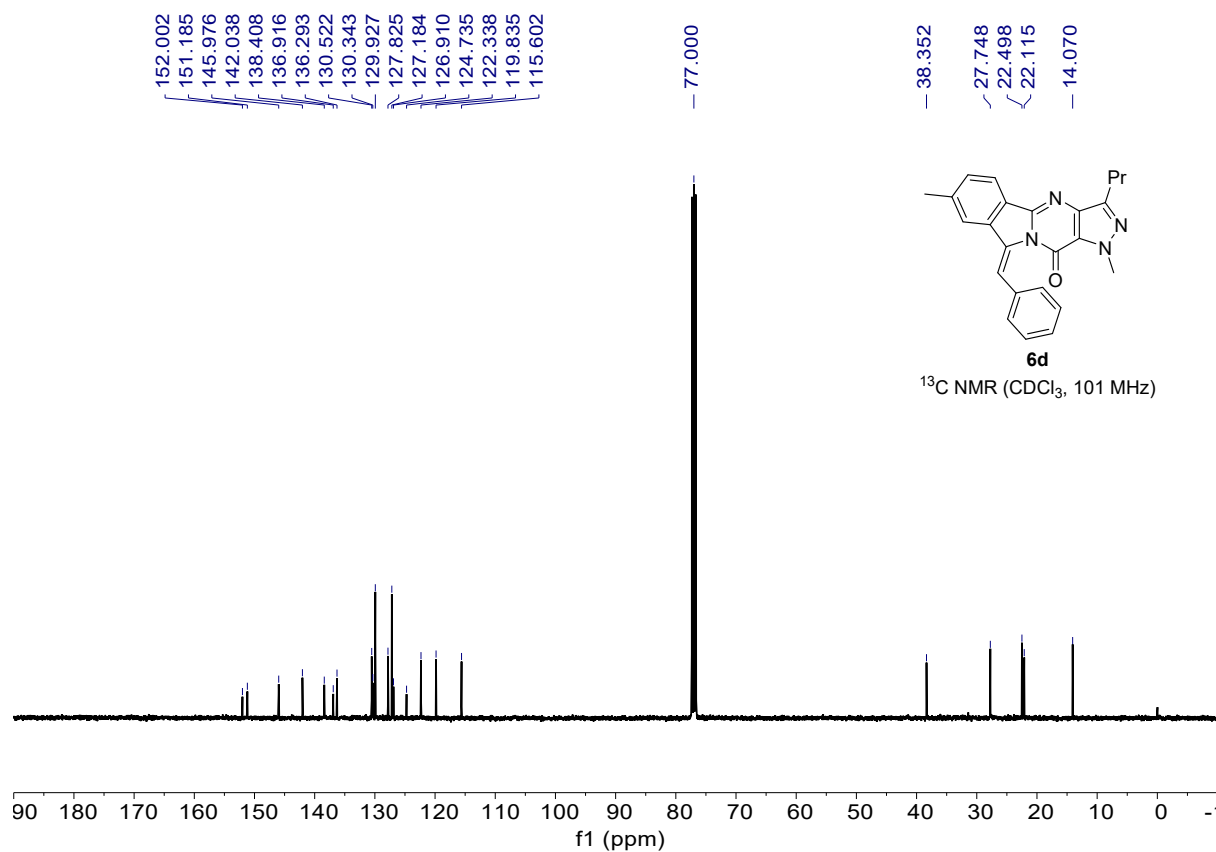

**(Z)-9-benzylidene-6-fluoro-1-methyl-3-propyl-1,9-dihydro-11H-pyrazolo[4',3':4,5]pyrimido[2,1-a]isoindol-11-one (6e)**

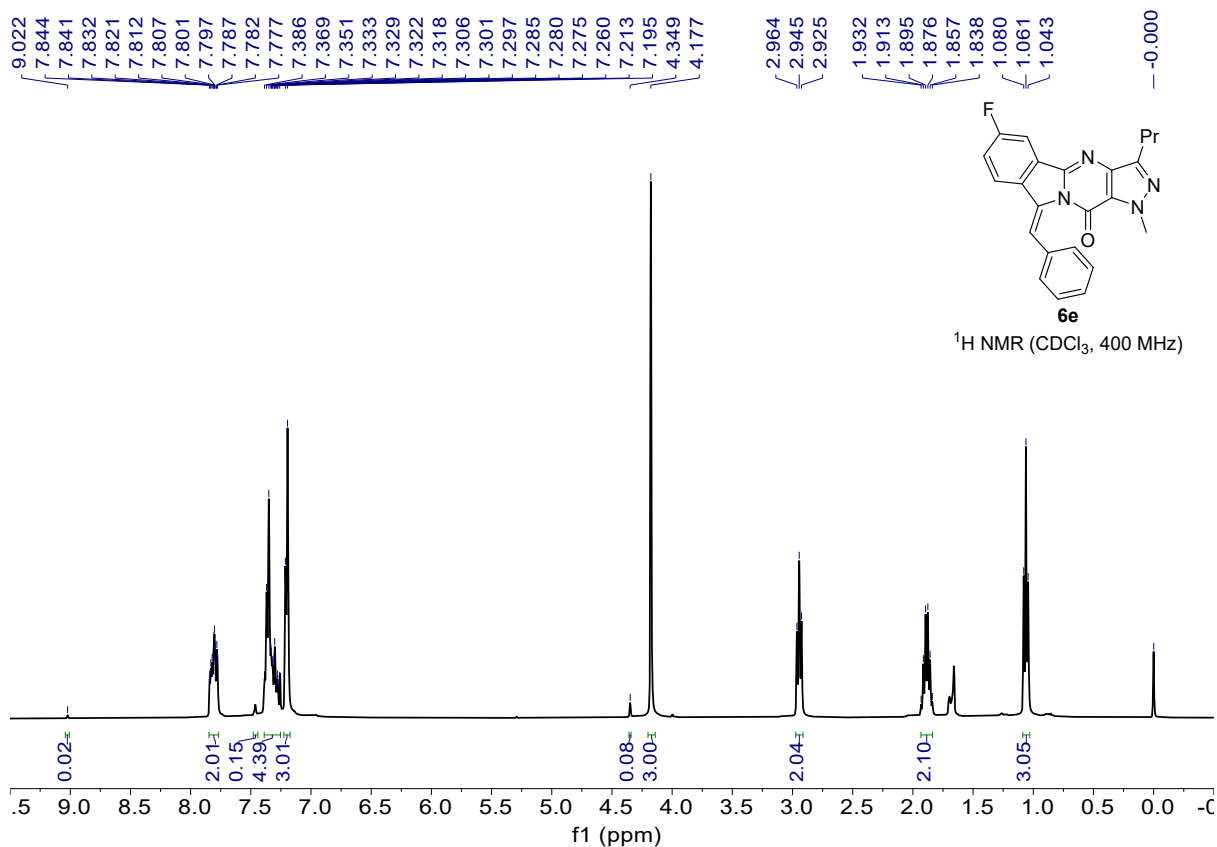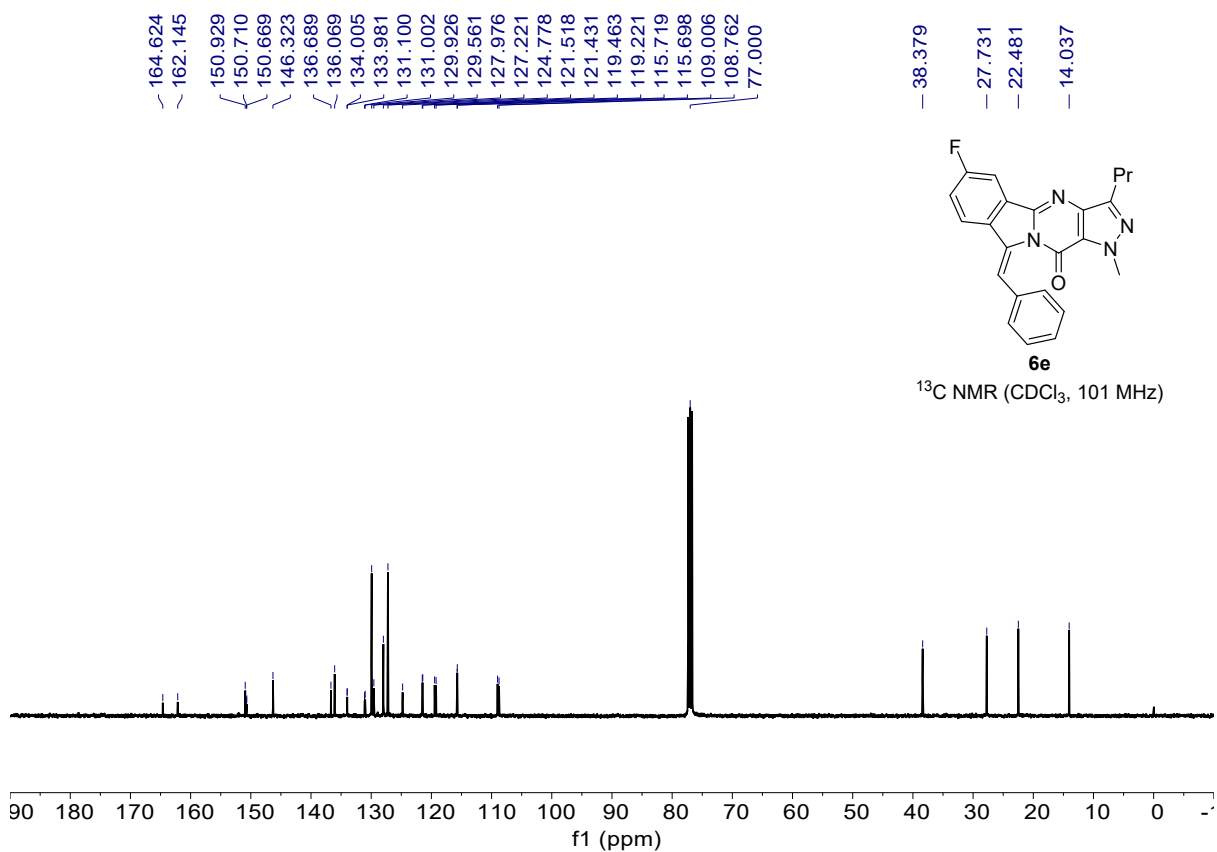



**(Z)-9-benzylidene-6-chloro-1-methyl-3-propyl-1,9-dihydro-11H-pyrazolo[4',3':4,5]pyrimido[2,1-a]isoindol-11-one (6f)**

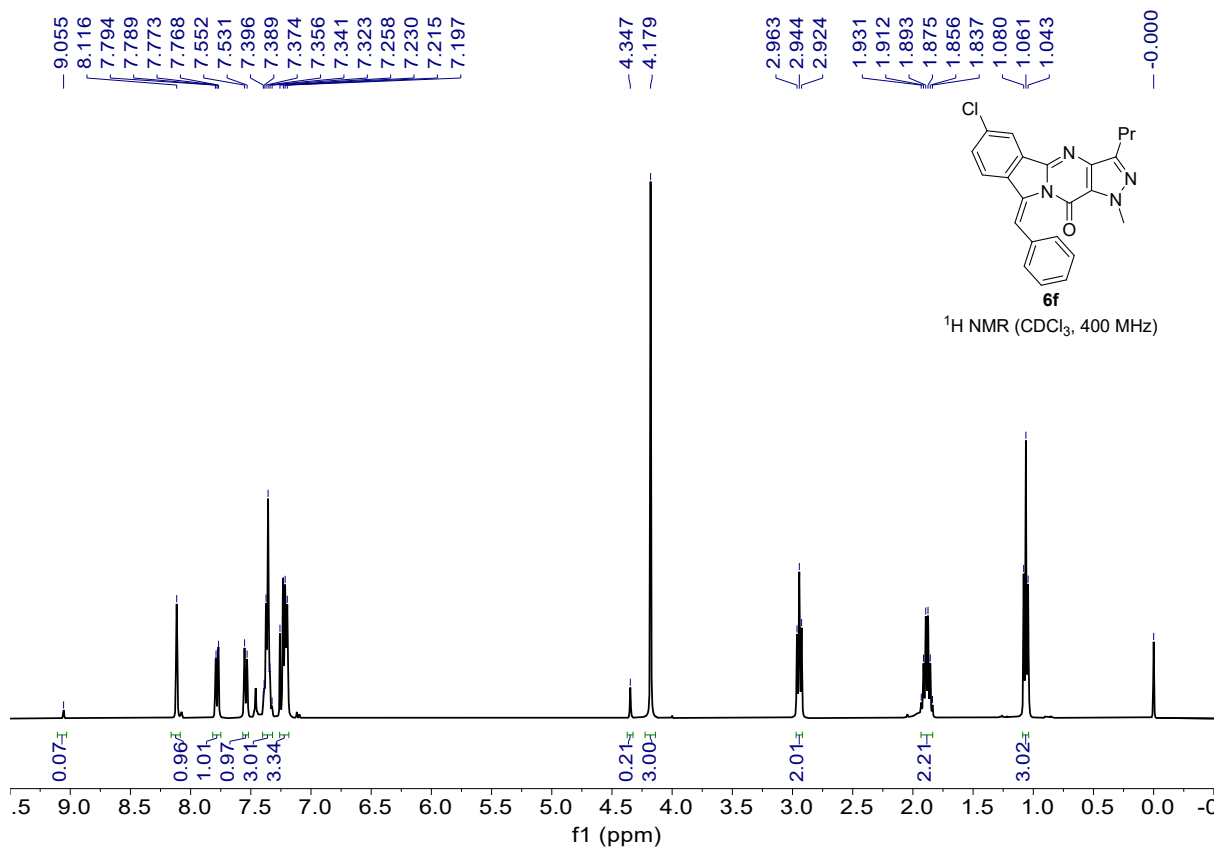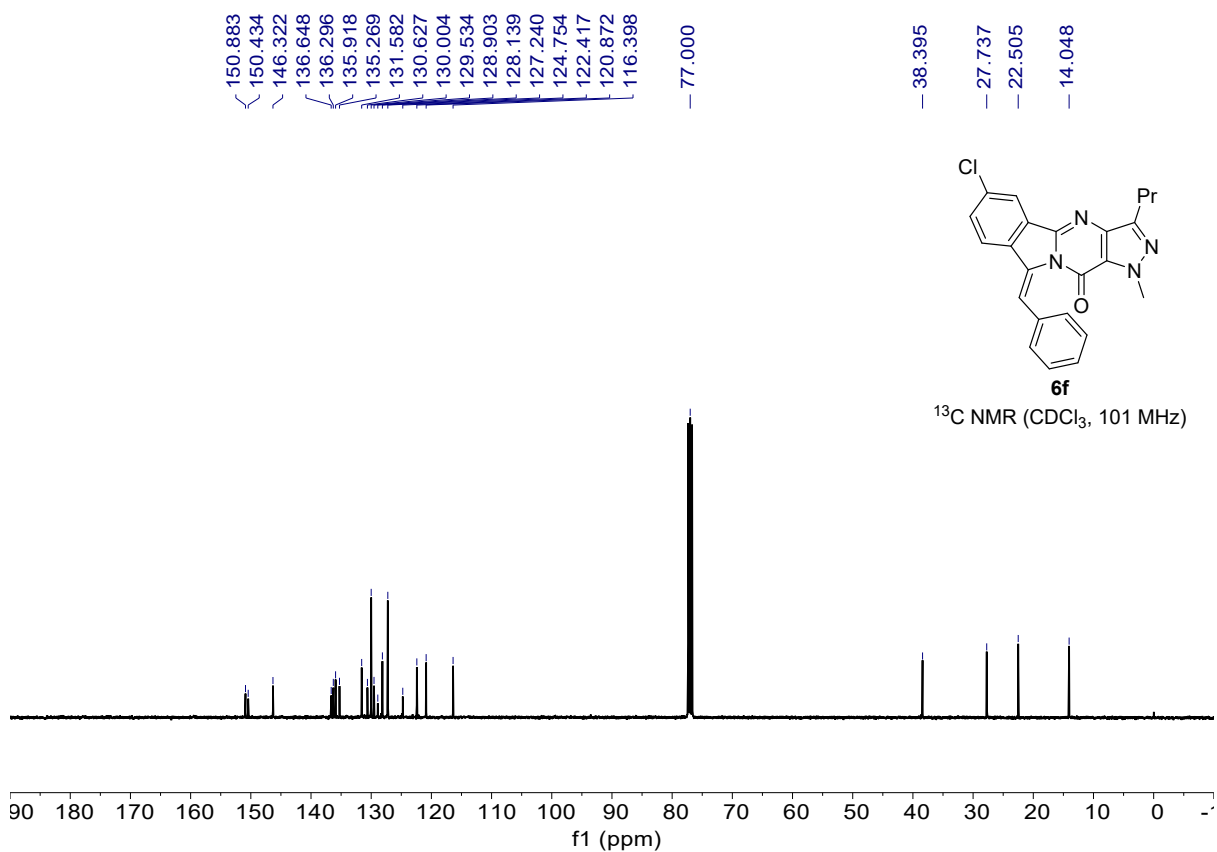

**(Z)-9-benzylidene-6-methoxy-1-methyl-3-propyl-1,9-dihydro-11H-pyrazolo[4',3':4,5]pyrimido[2,1-a]isoindol-11-one (6g)**

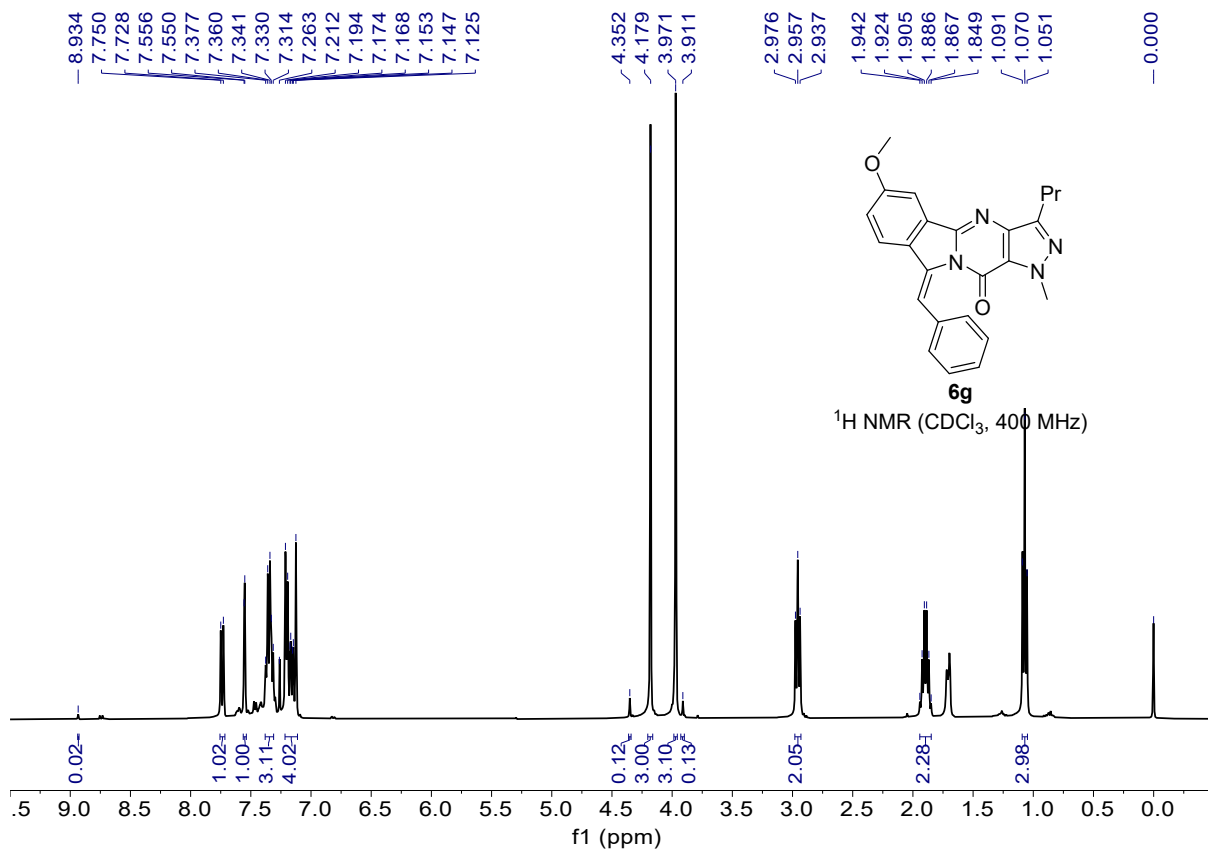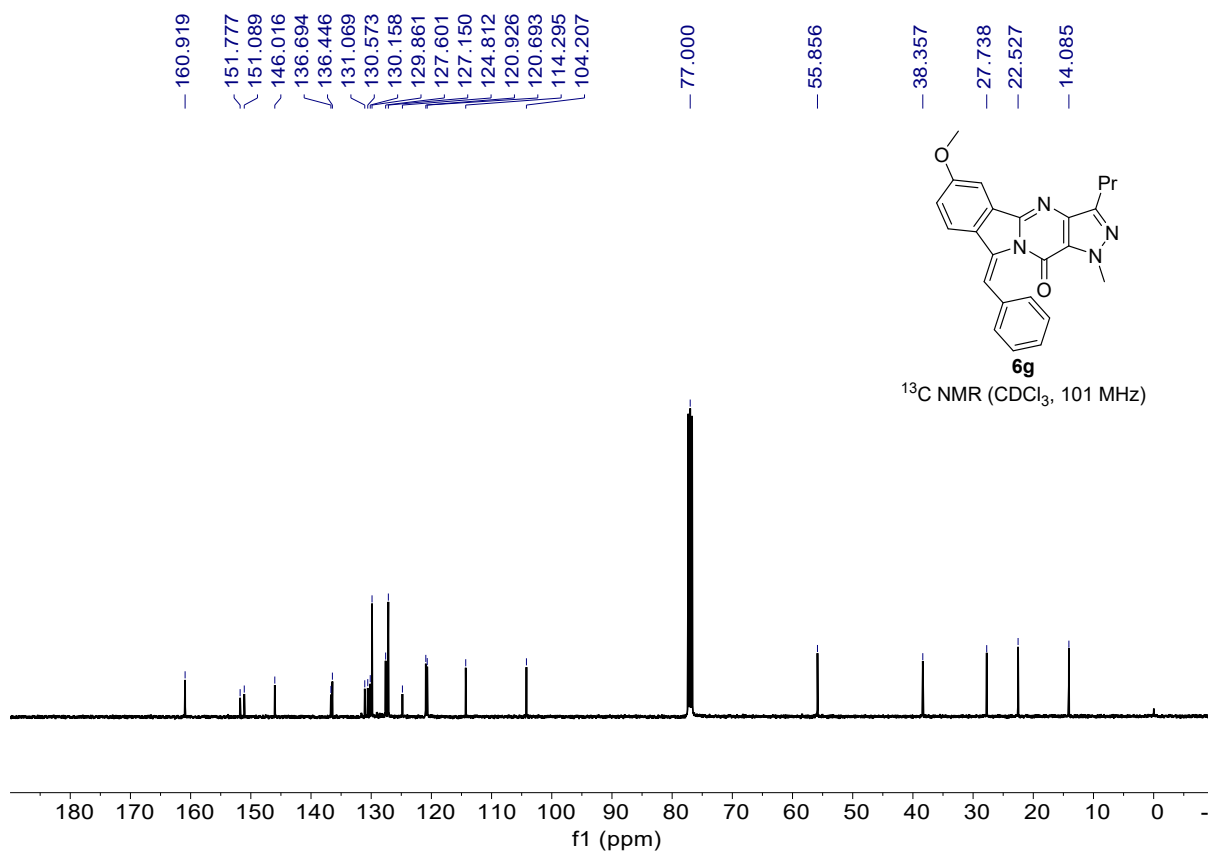

**(Z)-9-benzylidene-5-fluoro-1-methyl-3-propyl-1,9-dihydro-11H-pyrazolo[4',3':4,5]pyrimido[2,1-a]isoindol-11-one (6h)**

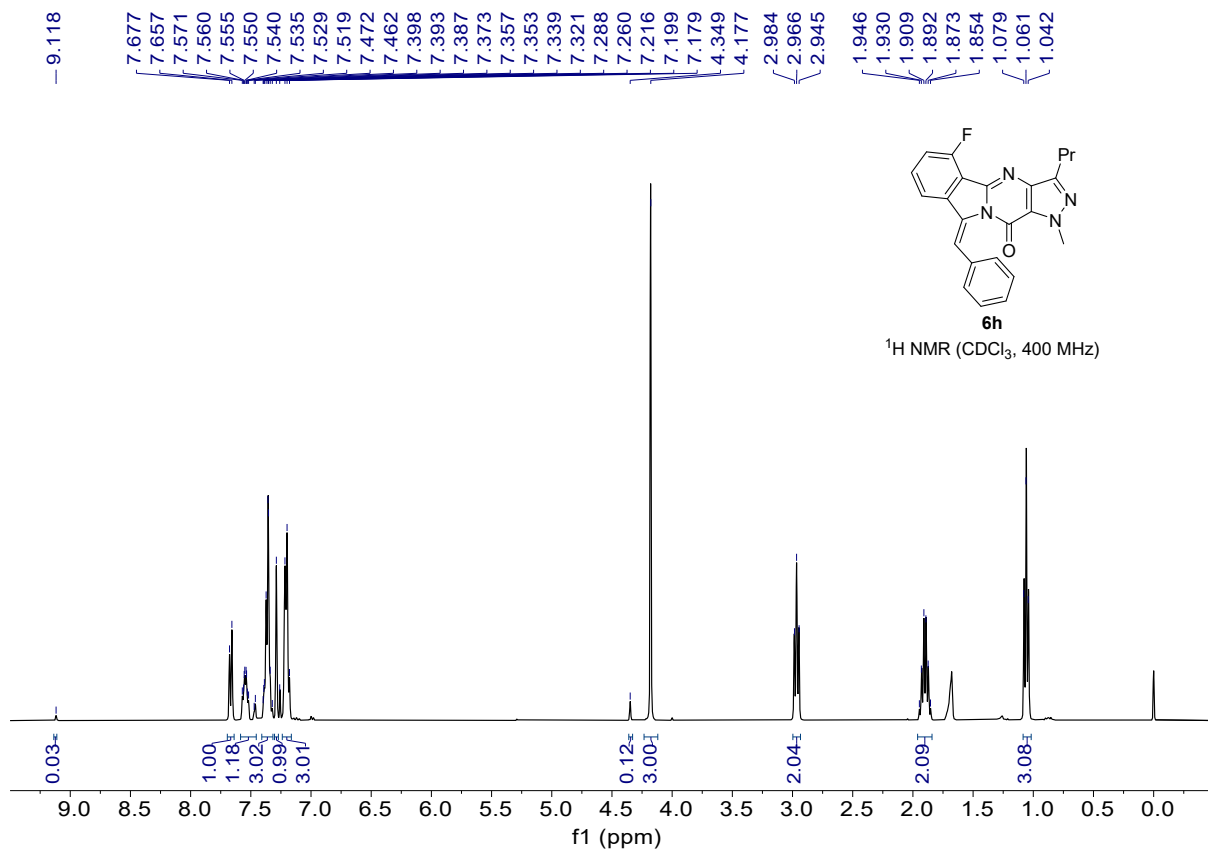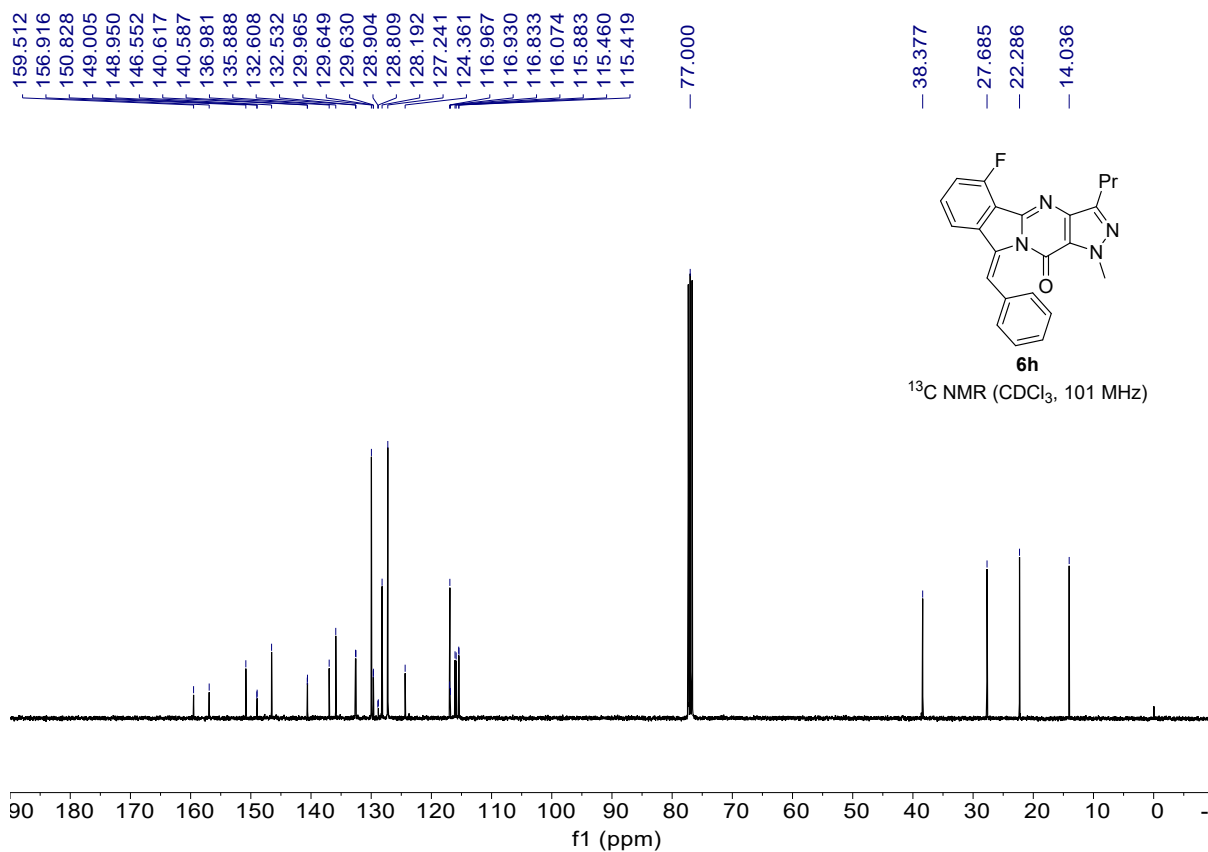

**(Z)-11-benzylidene-1-methyl-3-propyl-1,11-dihydro-13H-benzo[f]pyrazolo[4',3':4,5]pyrimido[2,1-a]isoindol-13-one (6i)**

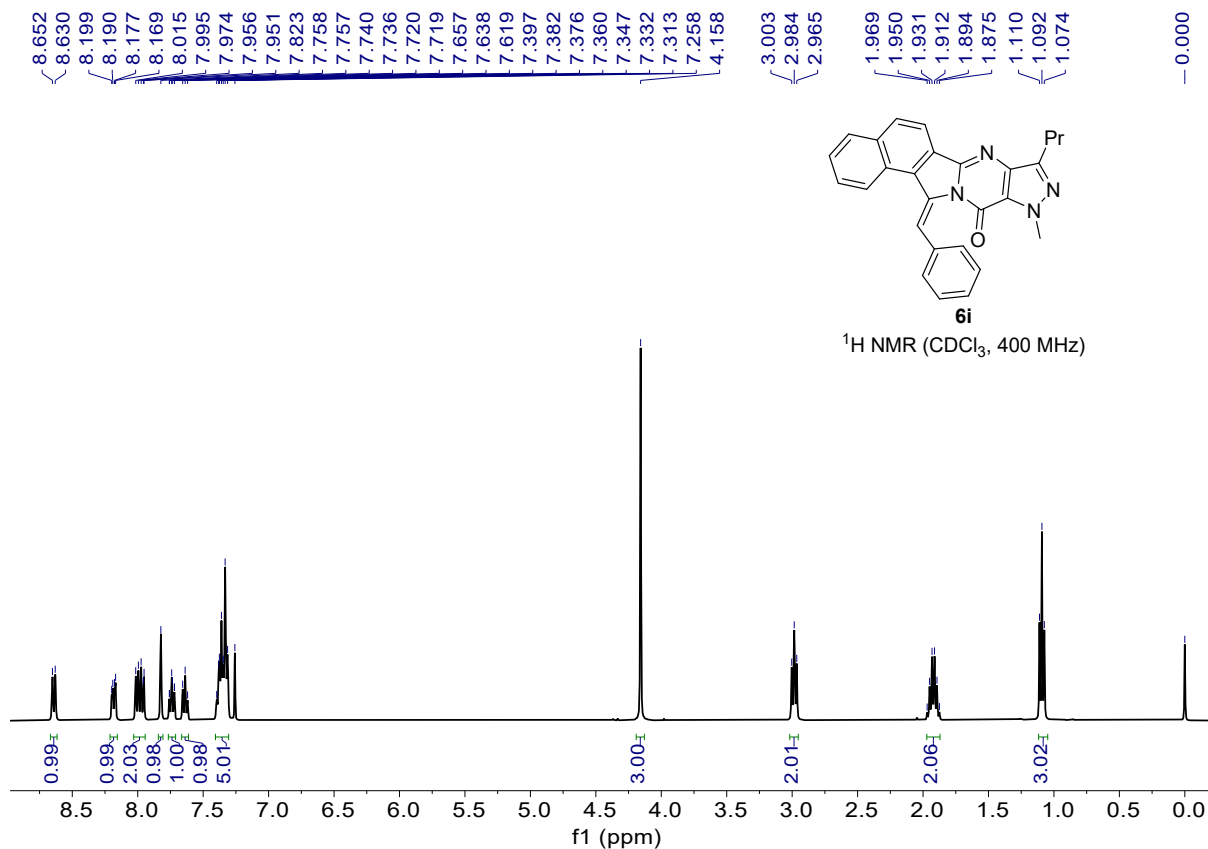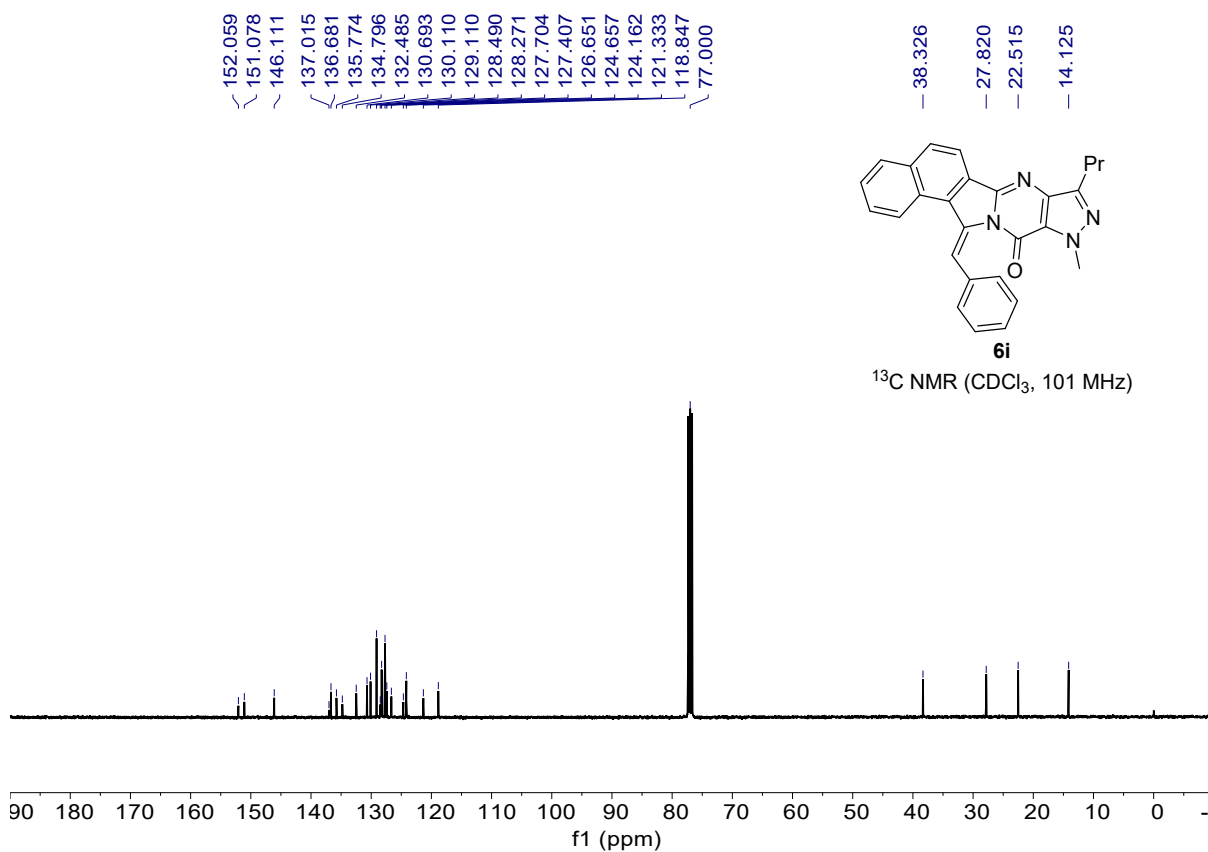

**(Z)-10-benzylidene-1-methyl-3-propyl-1,10-dihydro-12H-[1,3]dioxolo[4,5-f]pyrazolo[4',3':4,5]pyrimido[2,1-a]isoindol-12-one (6j)**

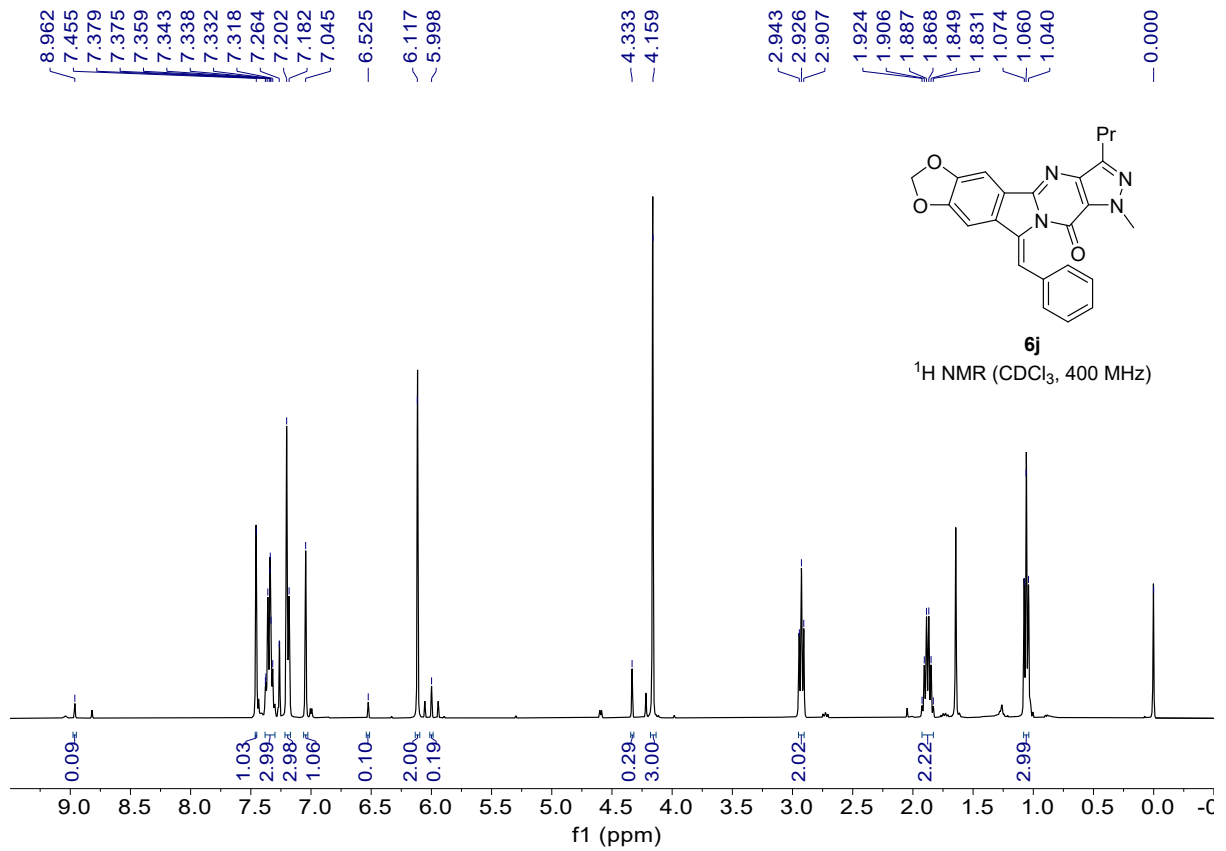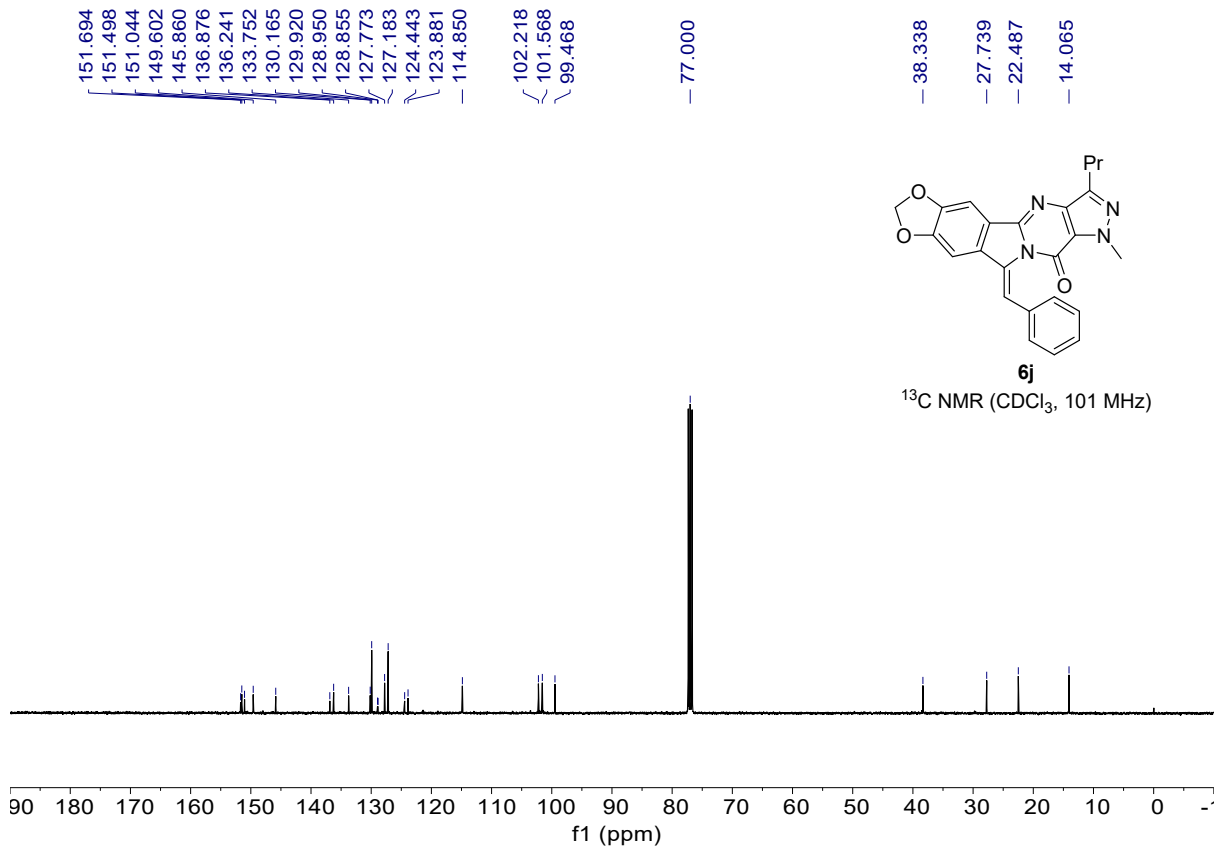

**(Z)-9-benzylidene-6,7-dimethoxy-1-methyl-3-propyl-1,9-dihydro-11H-pyrazolo[4',3':4,5]pyrimido[2,1-a]isoindol-11-one (6k)**

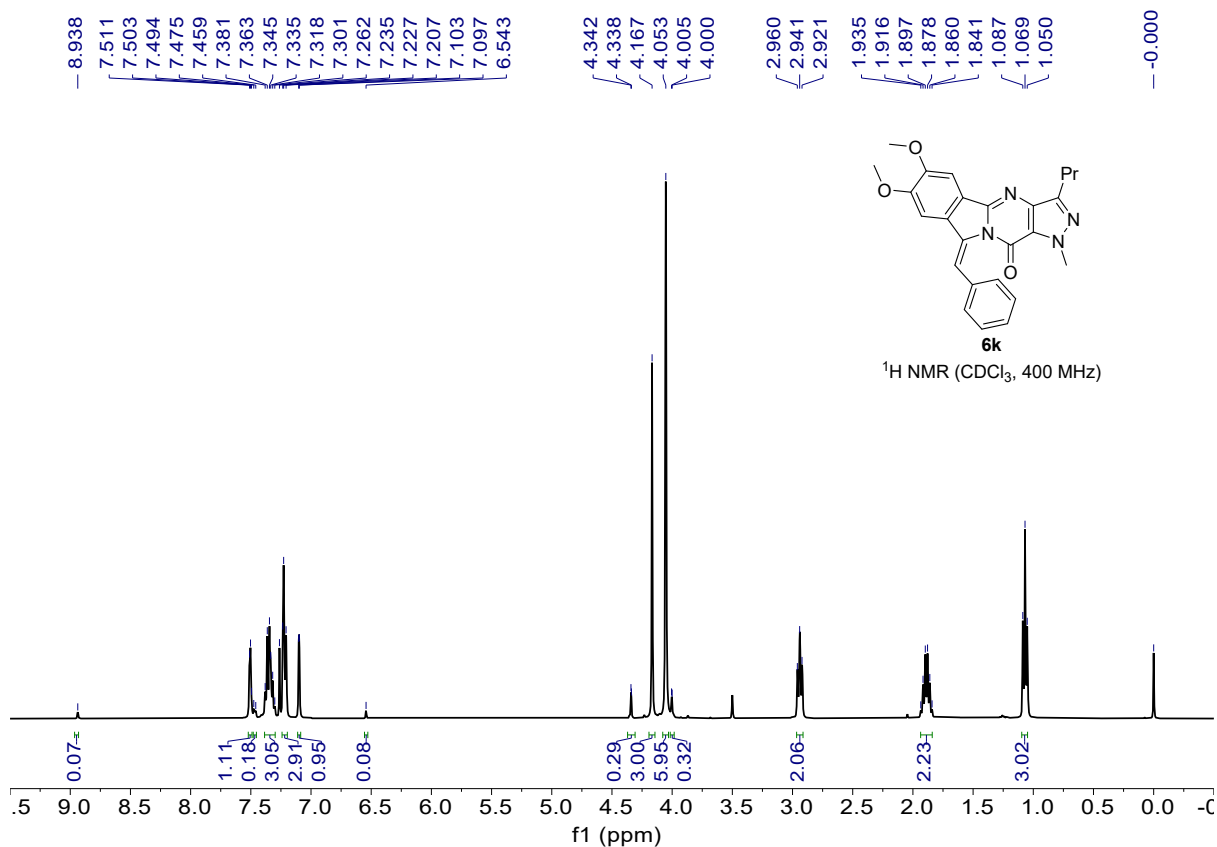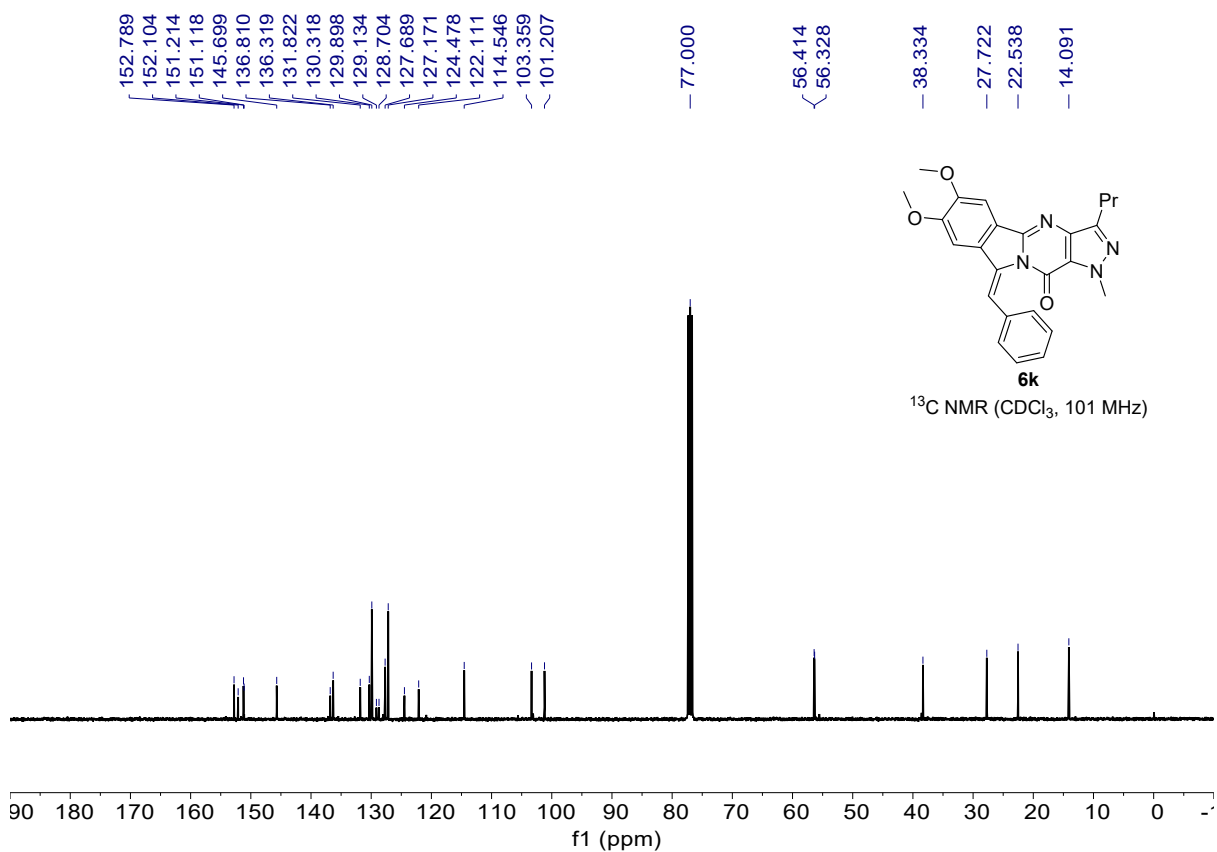

**(Z)-6,7-dimethoxy-9-(2-methoxybenzylidene)-1-methyl-3-propyl-1,9-dihydro-11H-pyrazolo[4',3':4,5]pyrimido[2,1-a]isoindol-11-one (6I)**

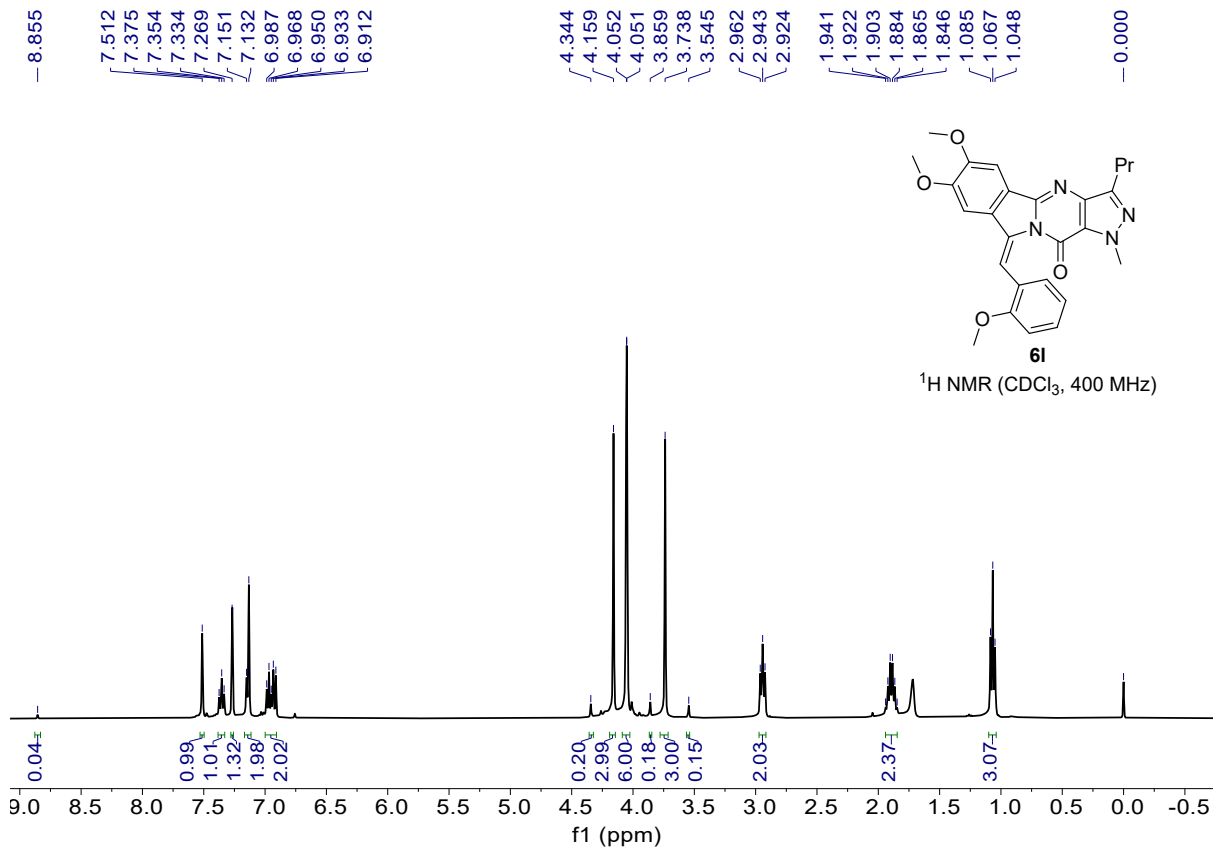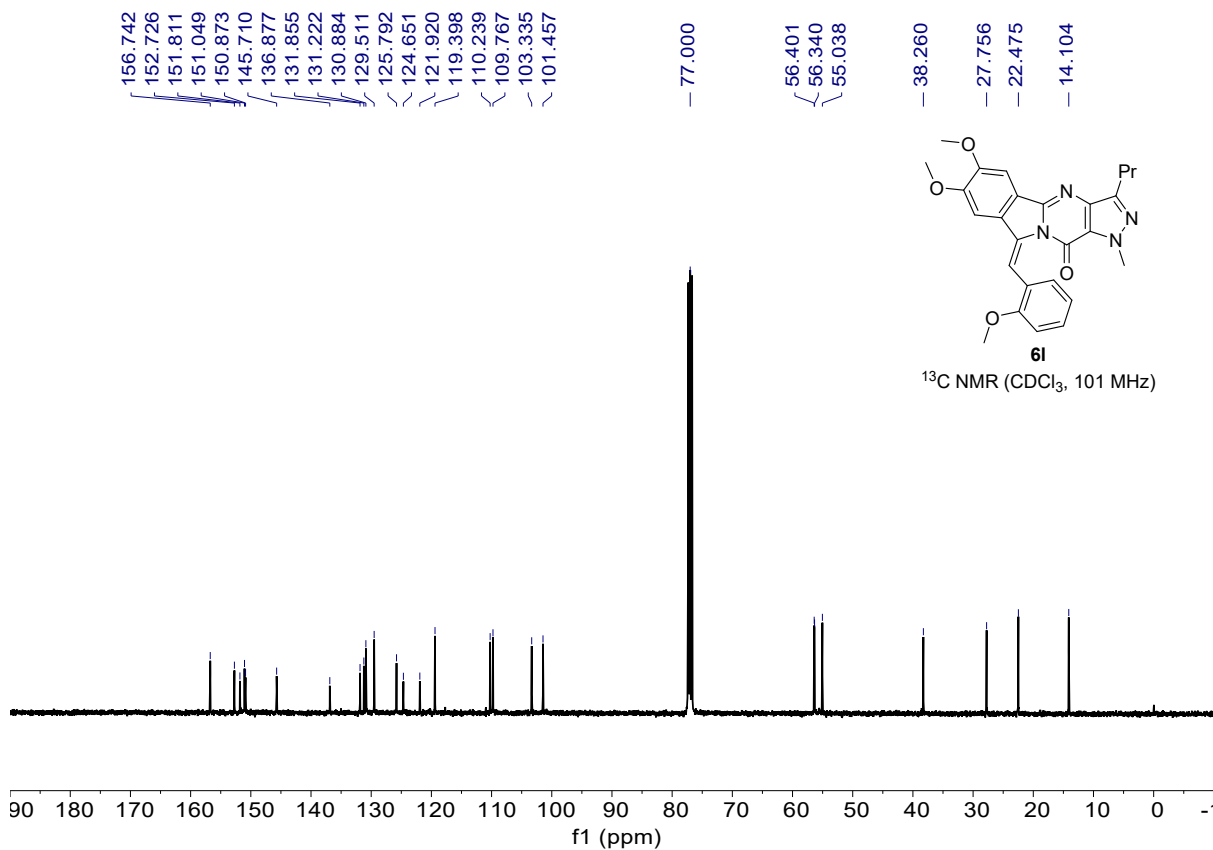

**(Z)-1-methyl-9-(naphthalen-2-ylmethylene)-3-propyl-1,9-dihydro-11H-pyrazolo[4',3':4,5]pyrimido[2,1-a]isoindol-11-one (6m)**

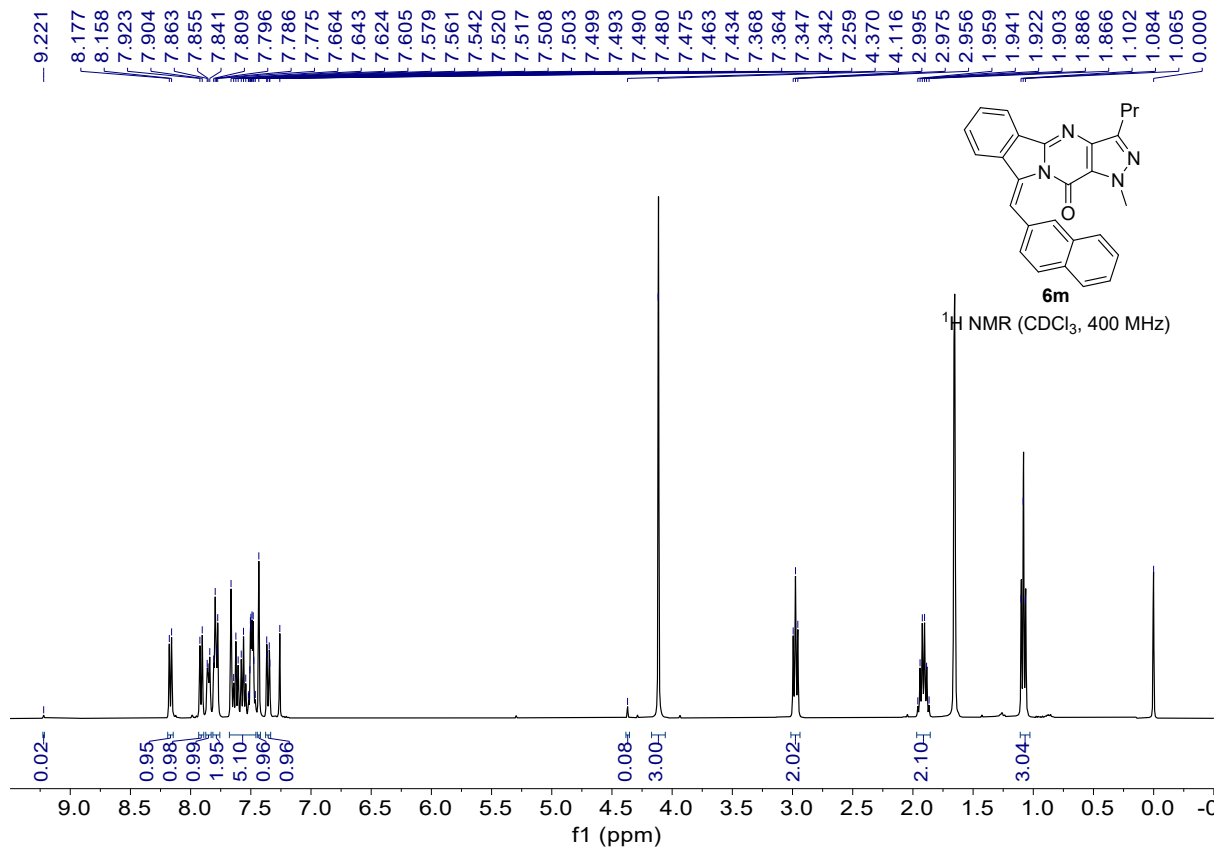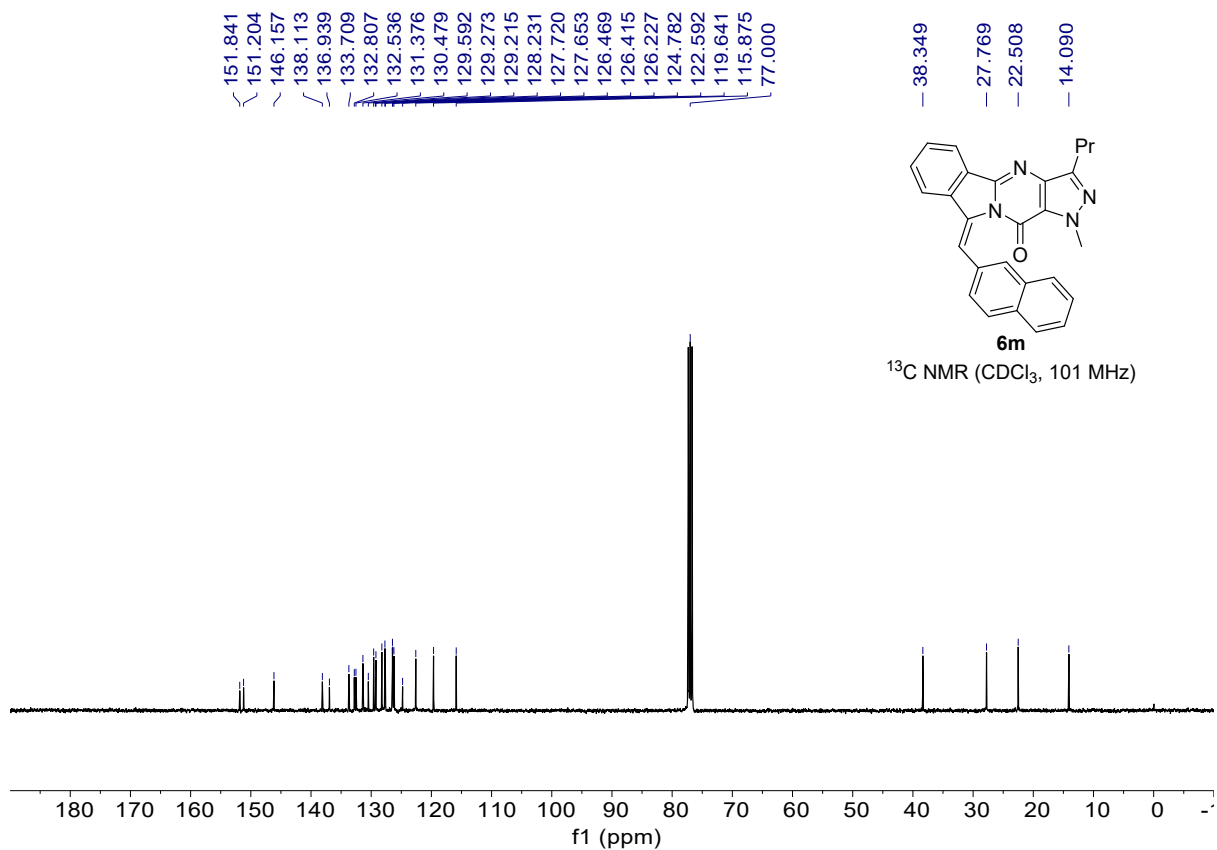



**(Z)-1-methyl-3-propyl-9-(thiophen-2-ylmethylene)-1,9-dihydro-11H-pyrazolo[4',3':4,5]pyrimido[2,1-a]isoindol-11-one (6n)**

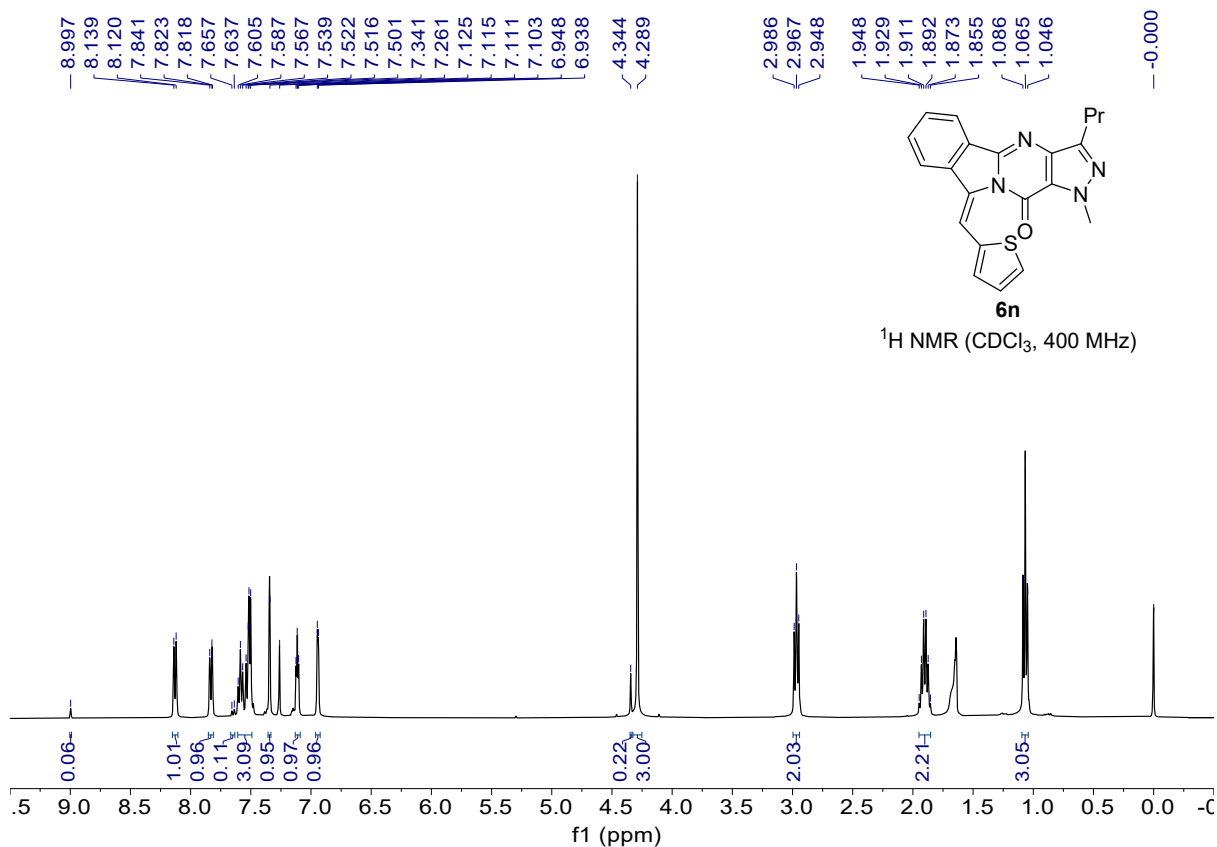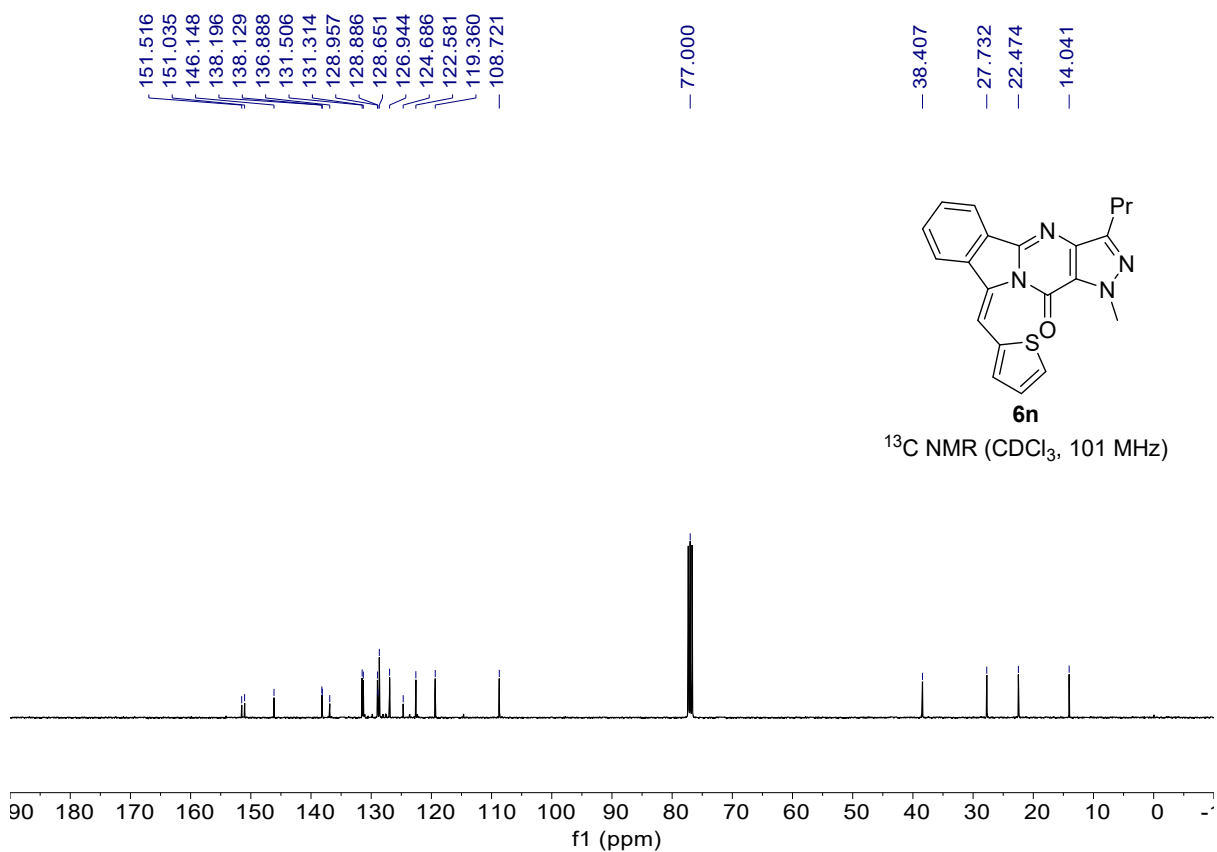

**(Z)-9-(4-fluorobenzylidene)-1-methyl-3-propyl-1,9-dihydro-11H-pyrazolo[4',3':4,5]pyrimido[2,1-a]isoindol-11-one (6o)**

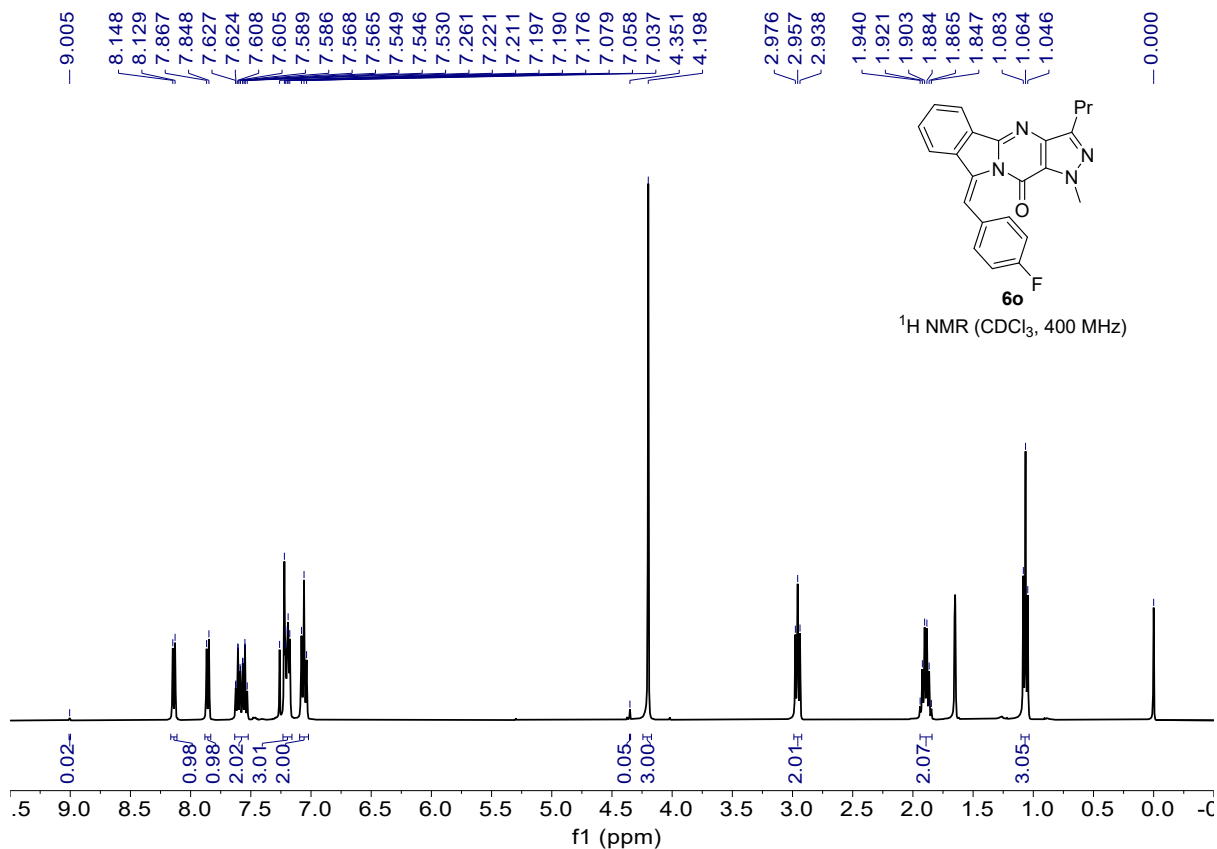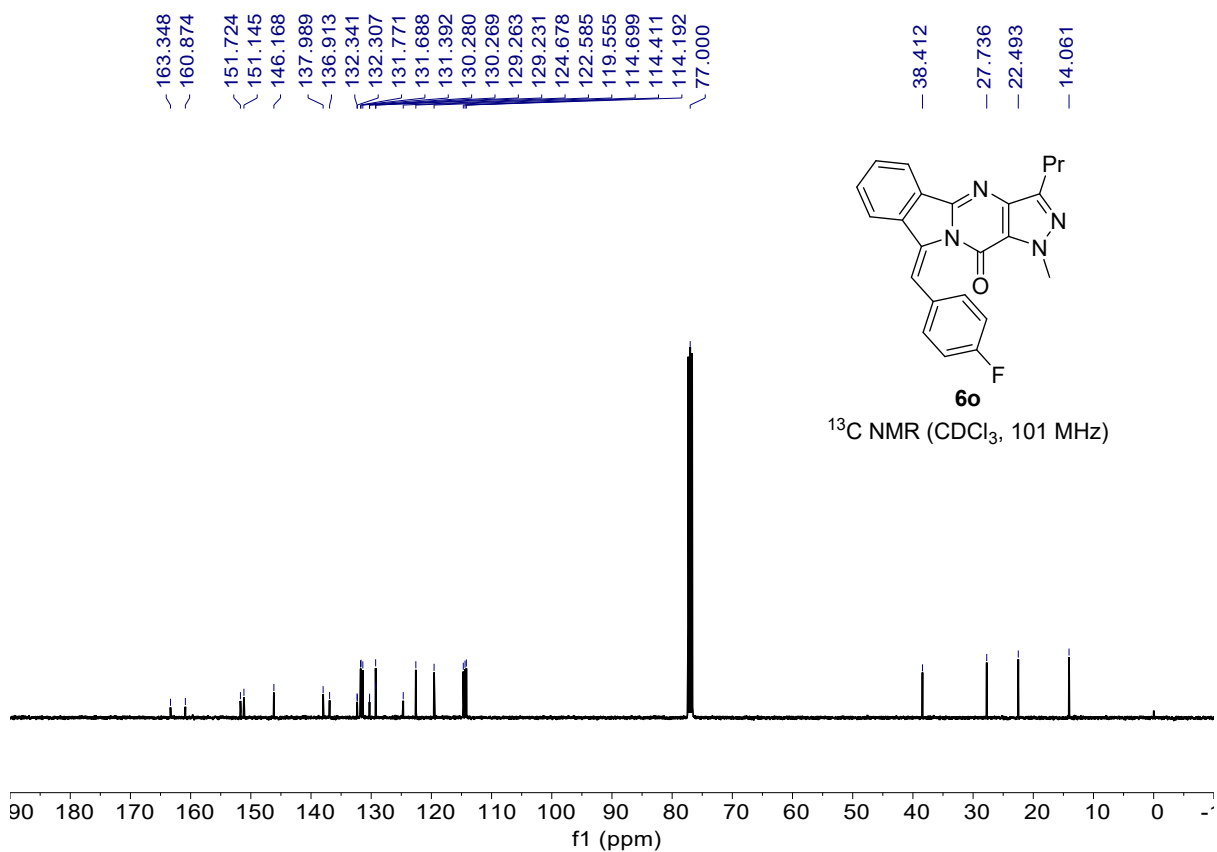

**(Z)-9-(4-chlorobenzylidene)-1-methyl-3-propyl-1,9-dihydro-11H-pyrazolo[4',3':4,5]pyrimido[2,1-a]isoindol-11-one (6p)**

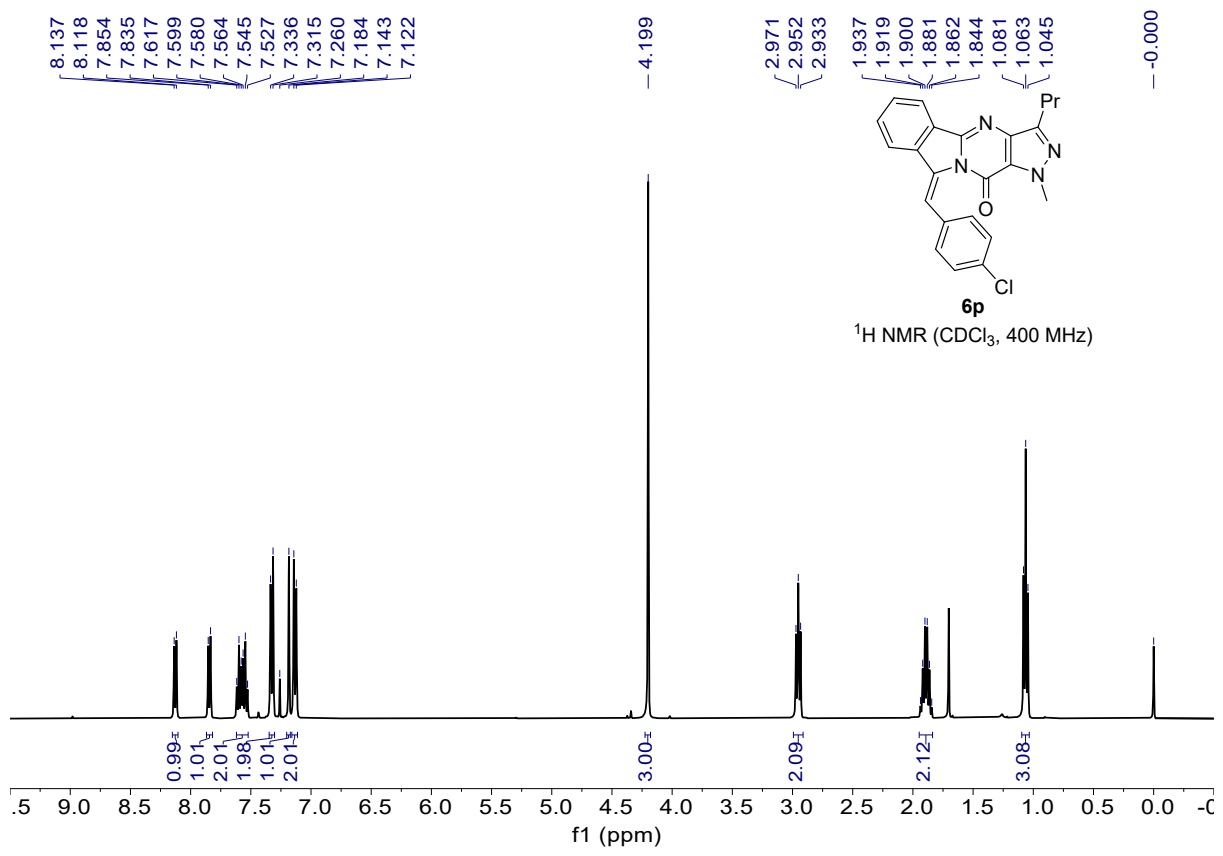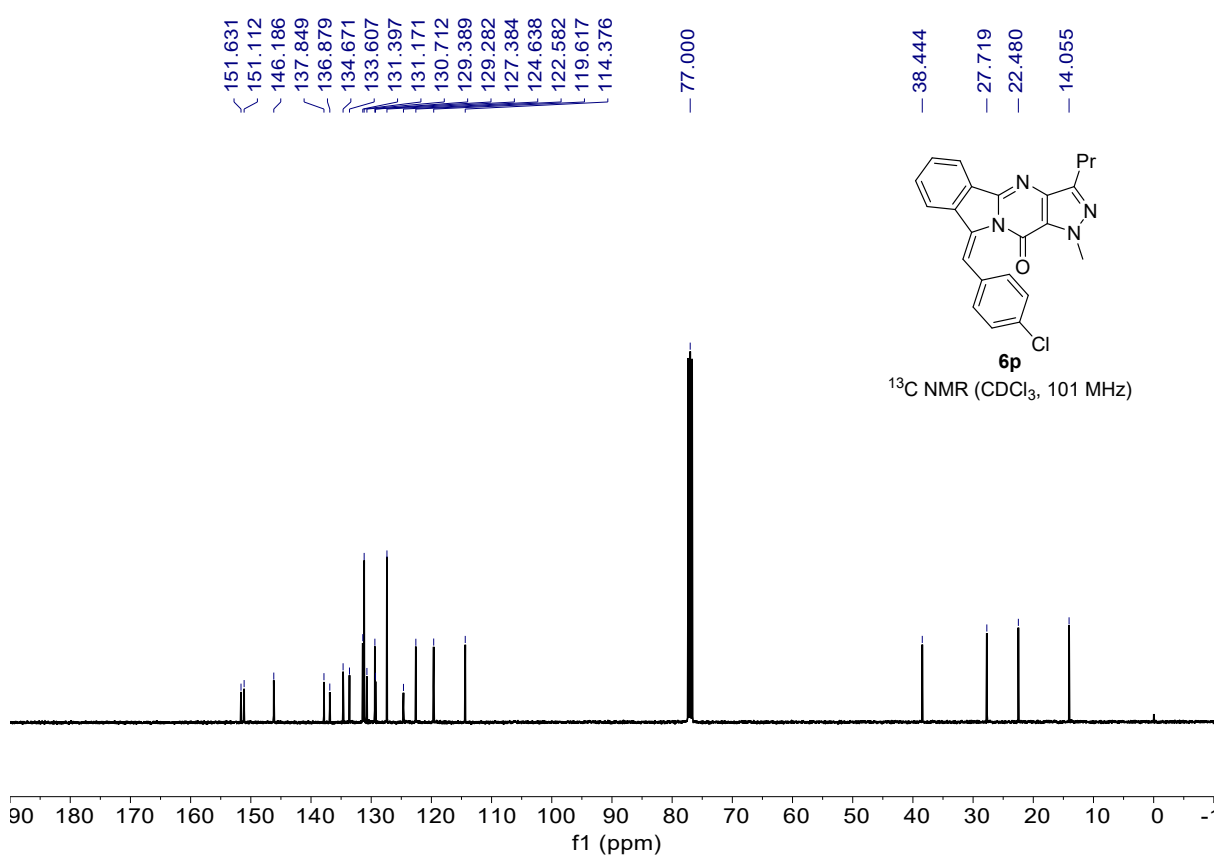

**(Z)-1-methyl-9-(4-methylbenzylidene)-3-propyl-1,9-dihydro-11H-pyrazolo[4',3':4,5]pyrimido[2,1-*a*]isoindol-11-one (6q)**

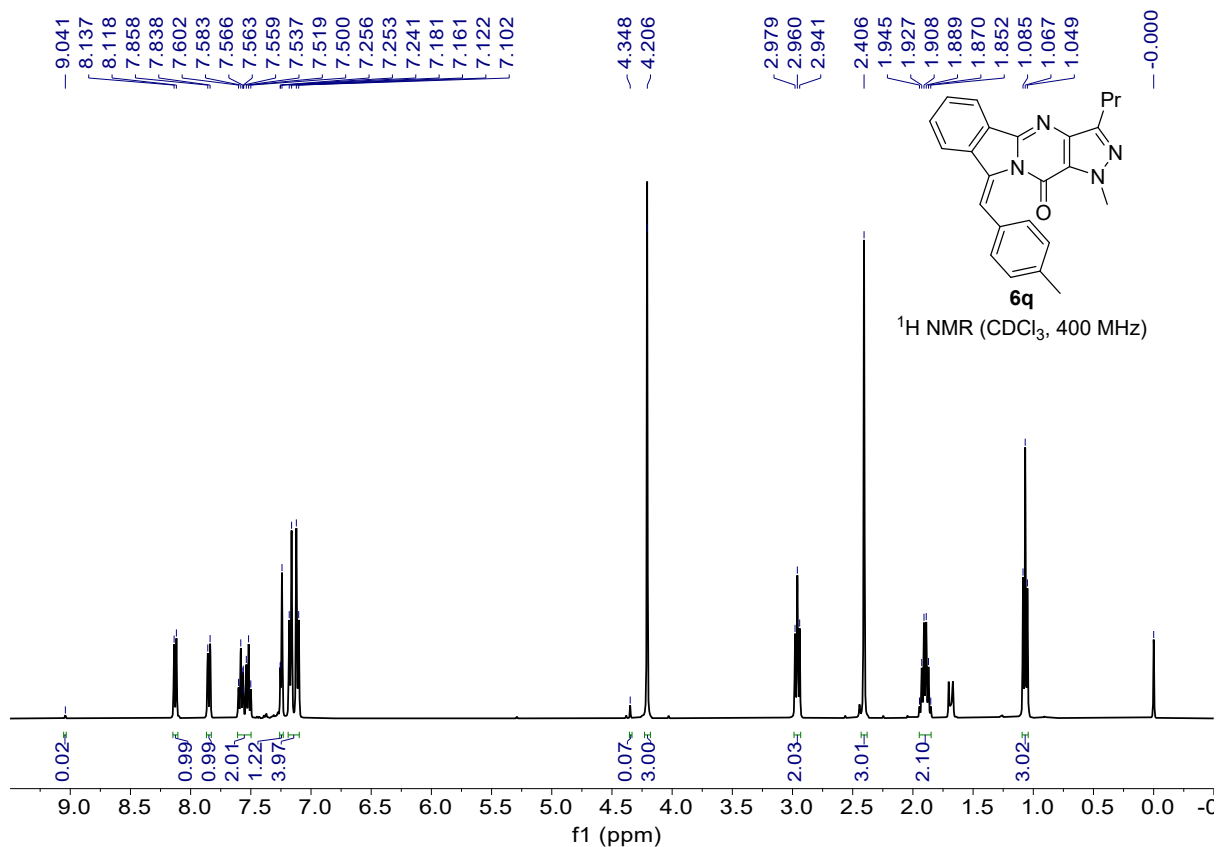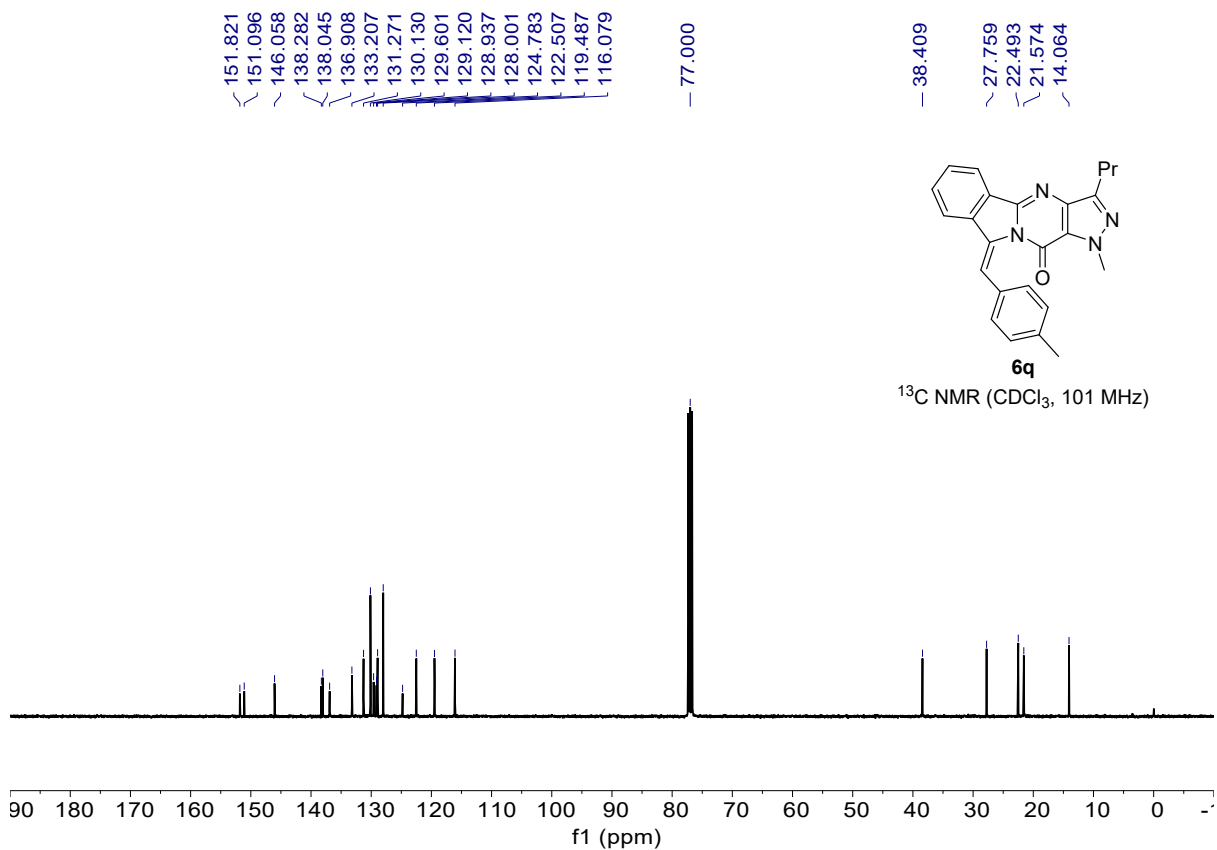

**(Z)-9-(4-methoxybenzylidene)-1-methyl-3-propyl-1,9-dihydro-11H-pyrazolo[4',3':4,5]pyrimido[2,1-a]isoindol-11-one (6r)**

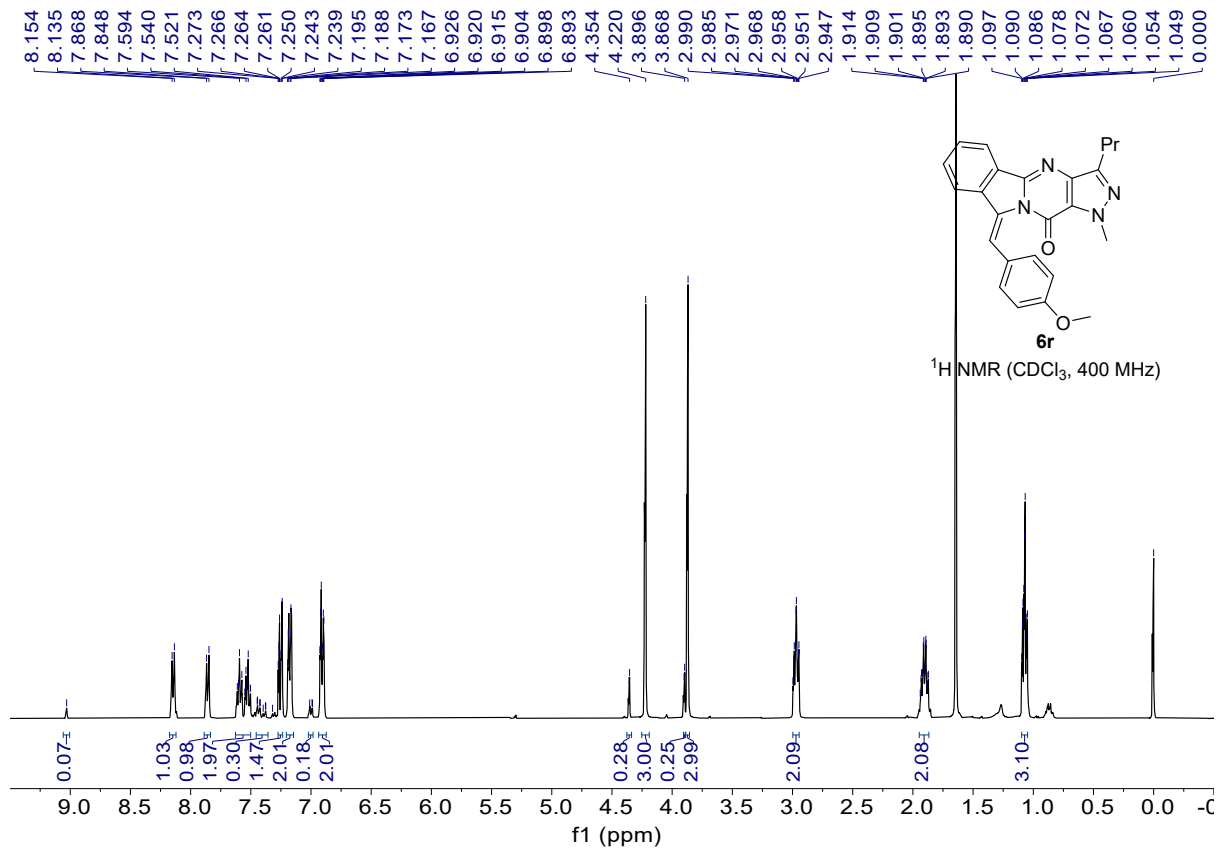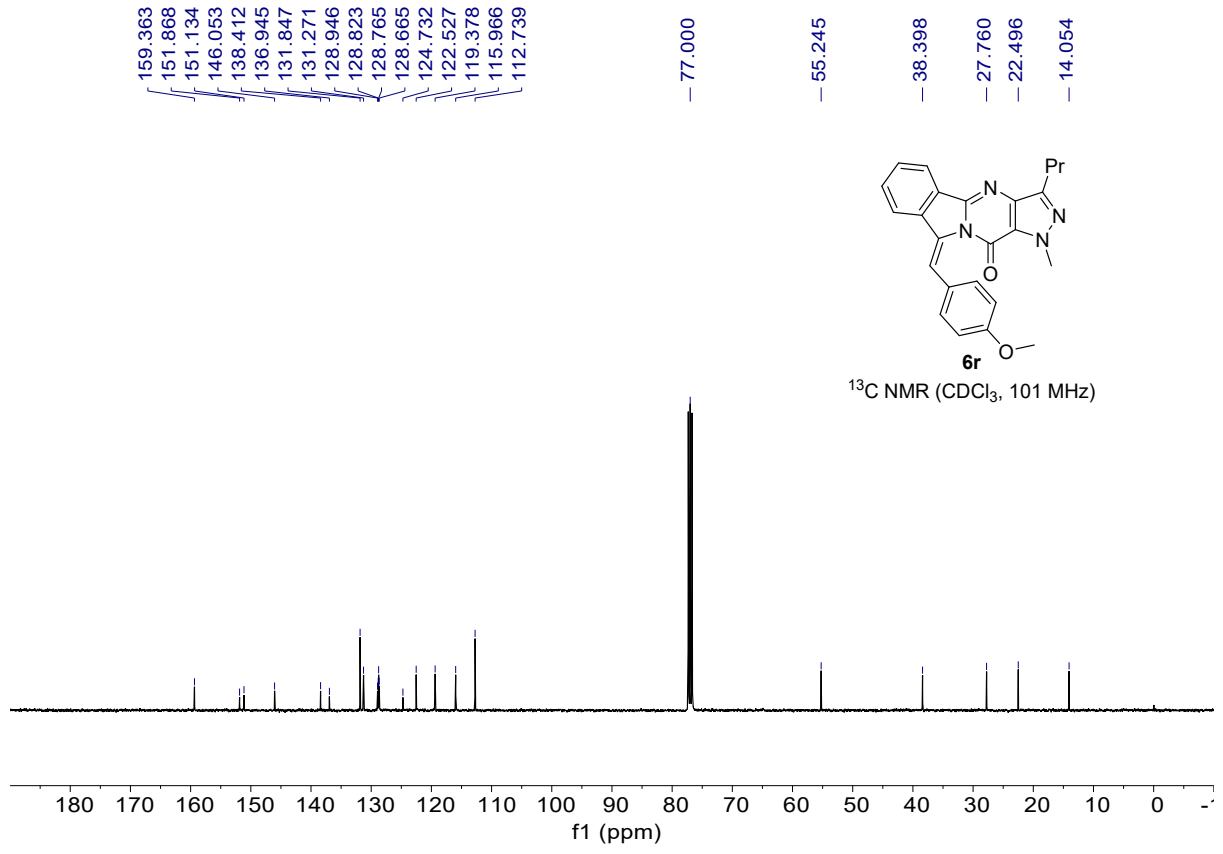

**(Z)-9-(4-ethylbenzylidene)-1-methyl-3-propyl-1,9-dihydro-11H-pyrazolo[4',3':4,5]pyrimido[2,1-a]isoindol-11-one (6s)**

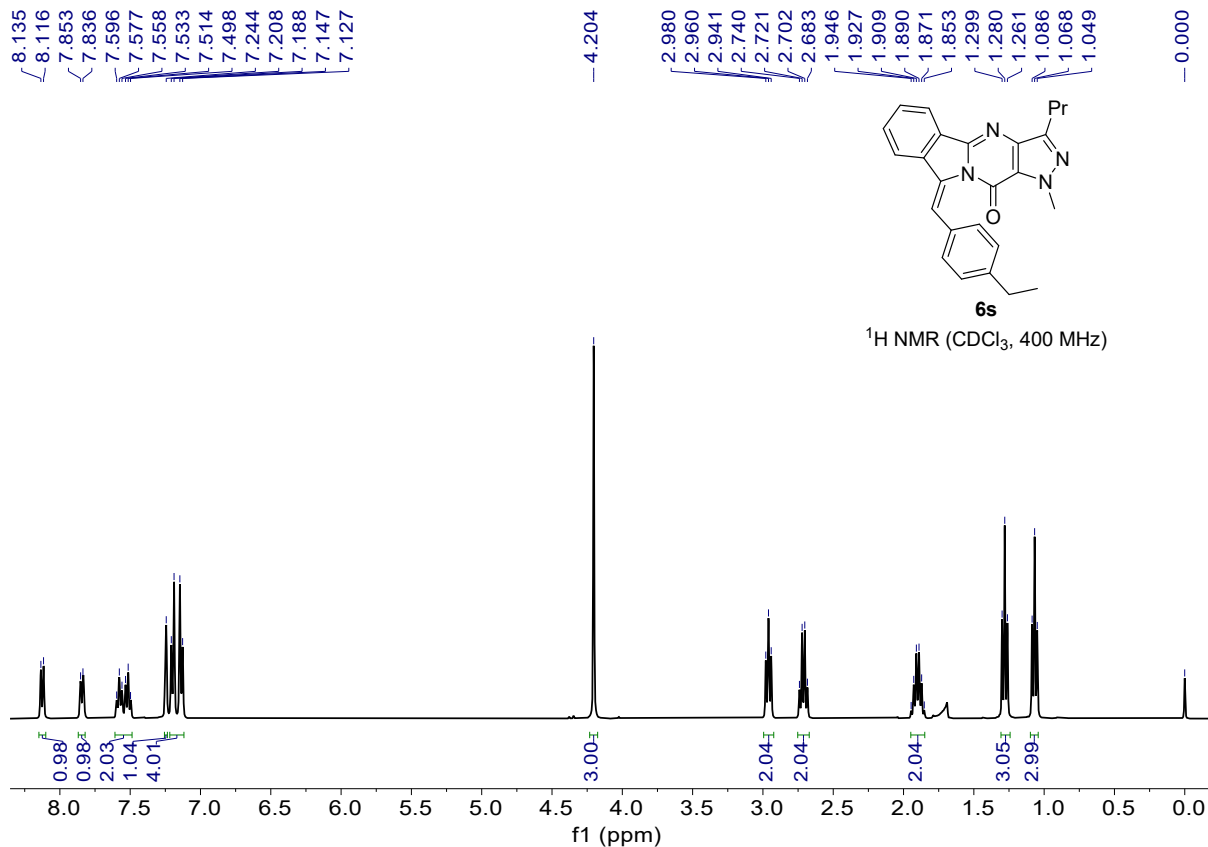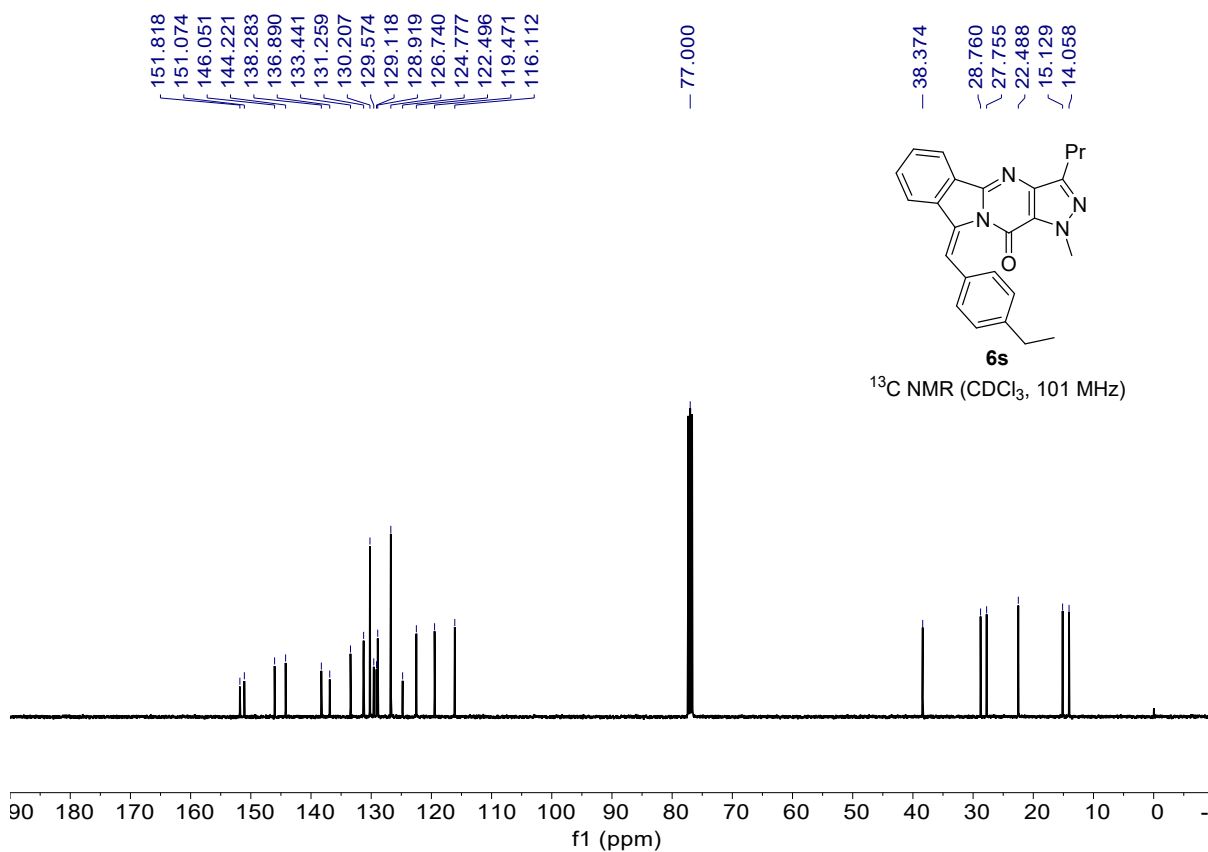

**(Z)-9-(4-ethoxybenzylidene)-1-methyl-3-propyl-1,9-dihydro-11H-pyrazolo[4',3':4,5]pyrimido[2,1-a]isoindol-11-one (6t)**

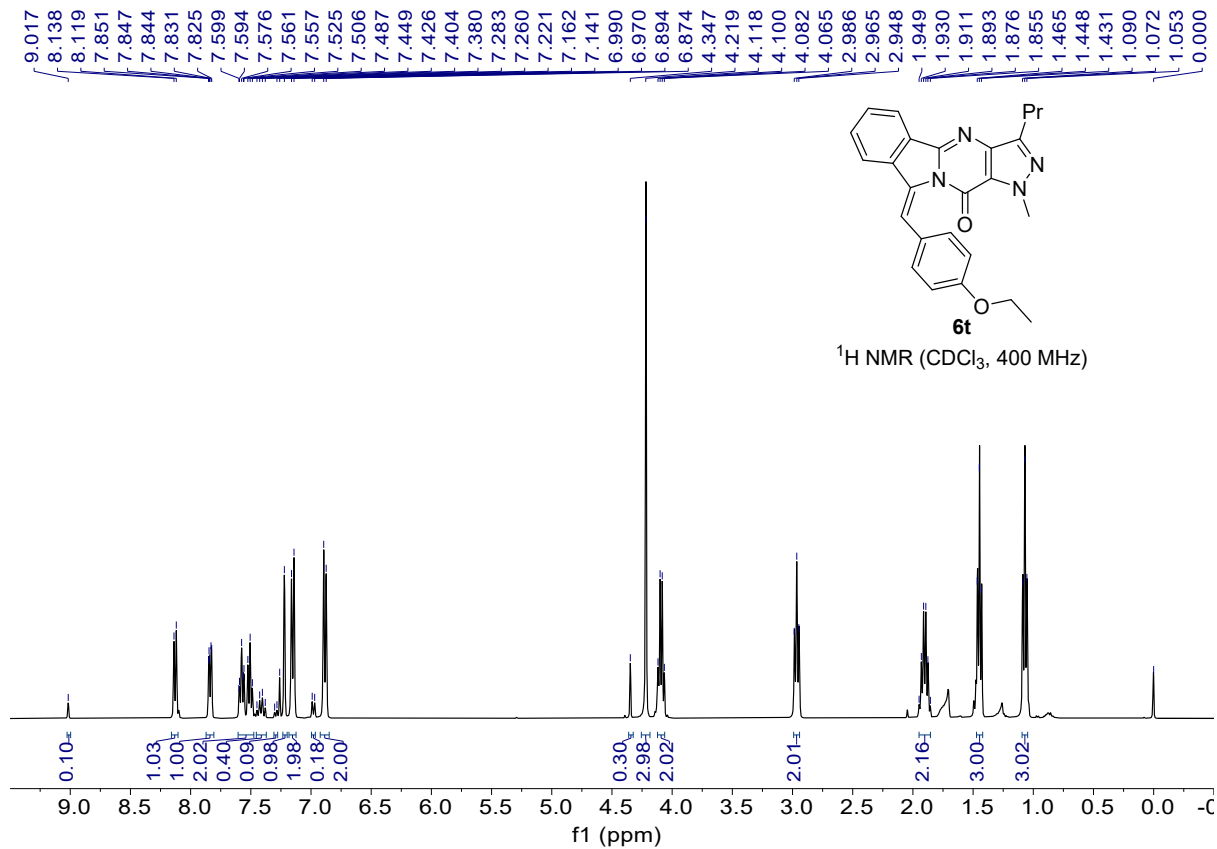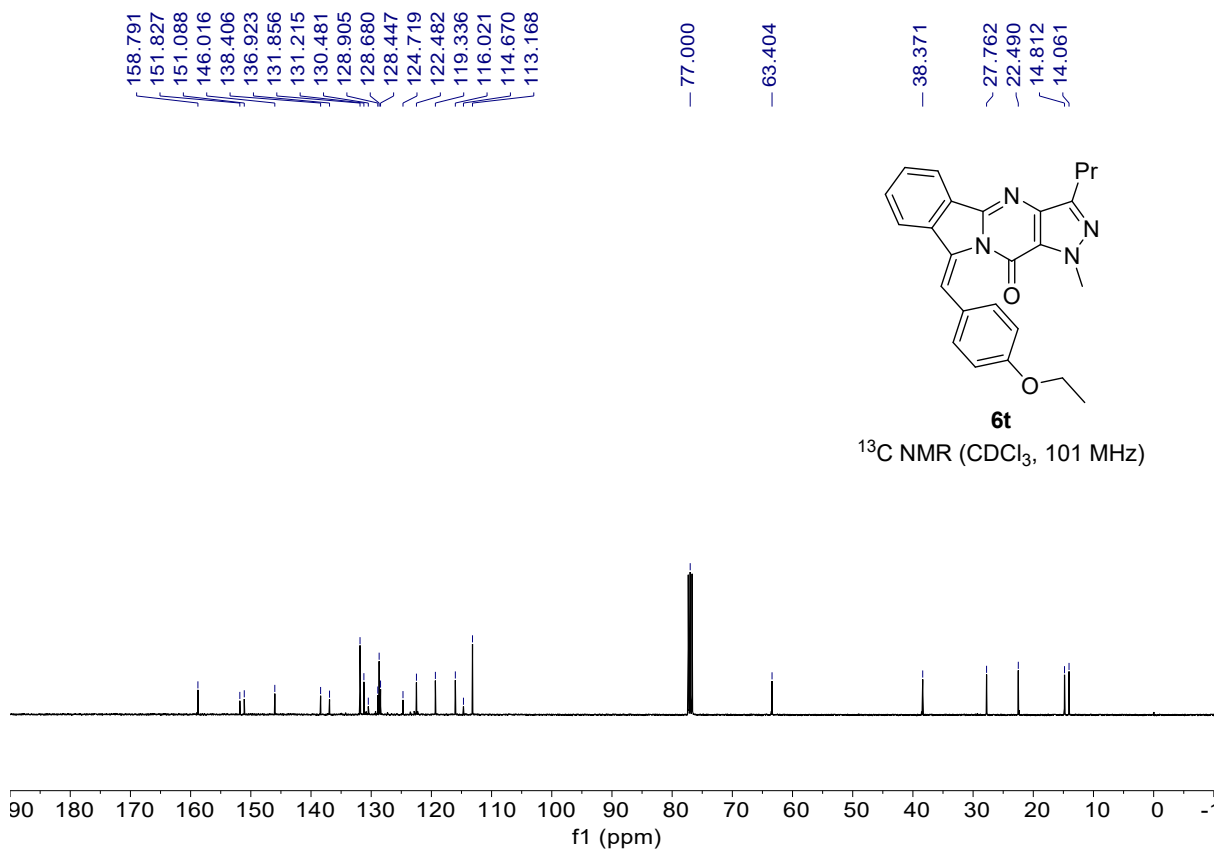

**(Z)-1-methyl-3-propyl-9-(4-propylbenzylidene)-1,9-dihydro-11H-pyrazolo[4',3':4,5]pyrimido[2,1-a]isoindol-11-one (6u)**

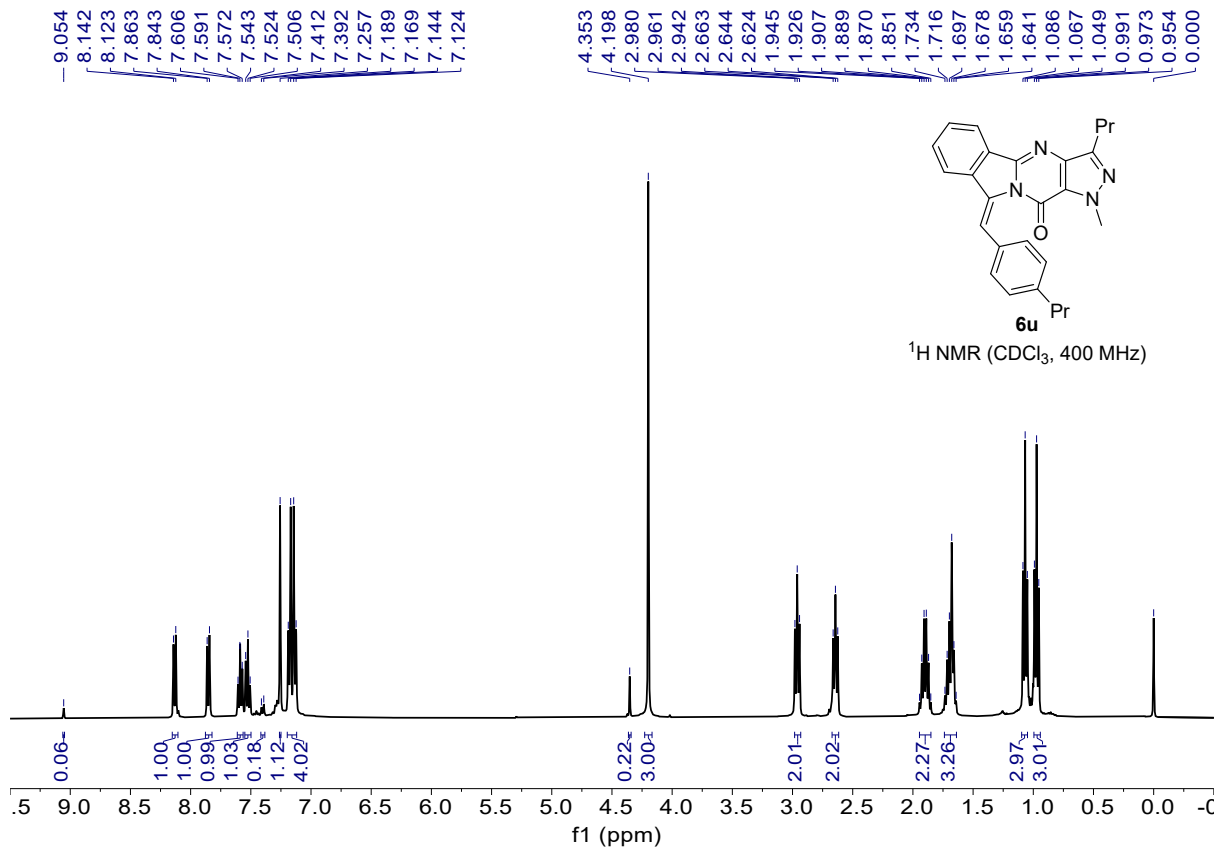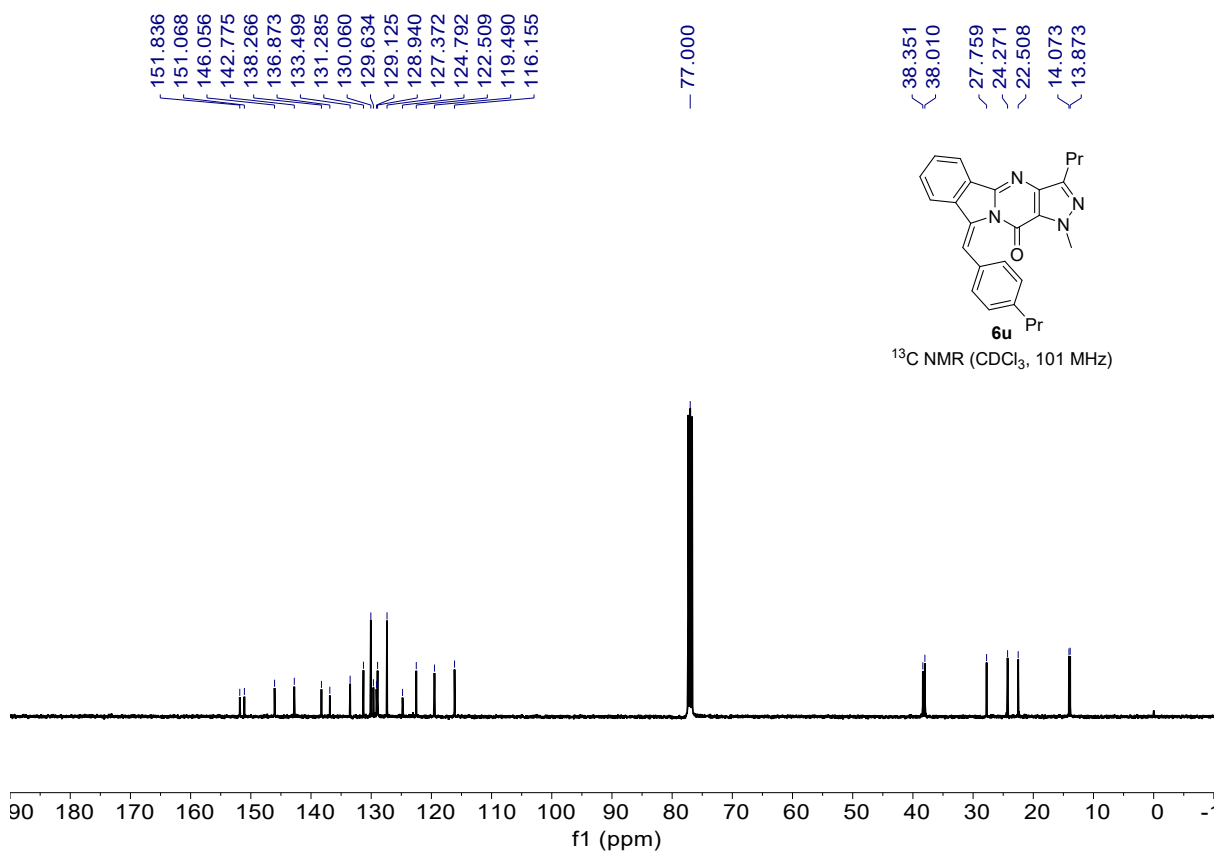



**(Z)-9-(4-butylbenzylidene)-1-methyl-3-propyl-1,9-dihydro-11H-pyrazolo[4',3':4,5]pyrimido[2,1-a]isoindol-11-one (6v)**

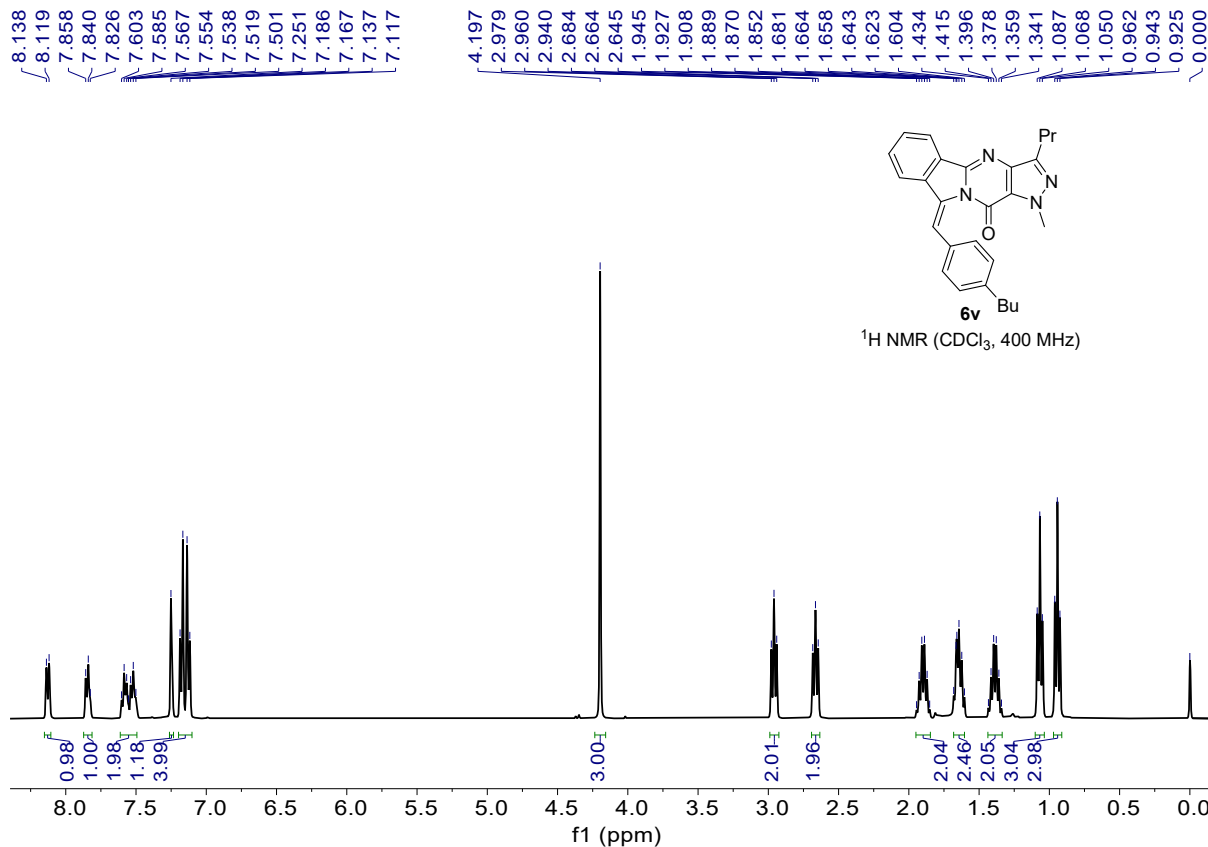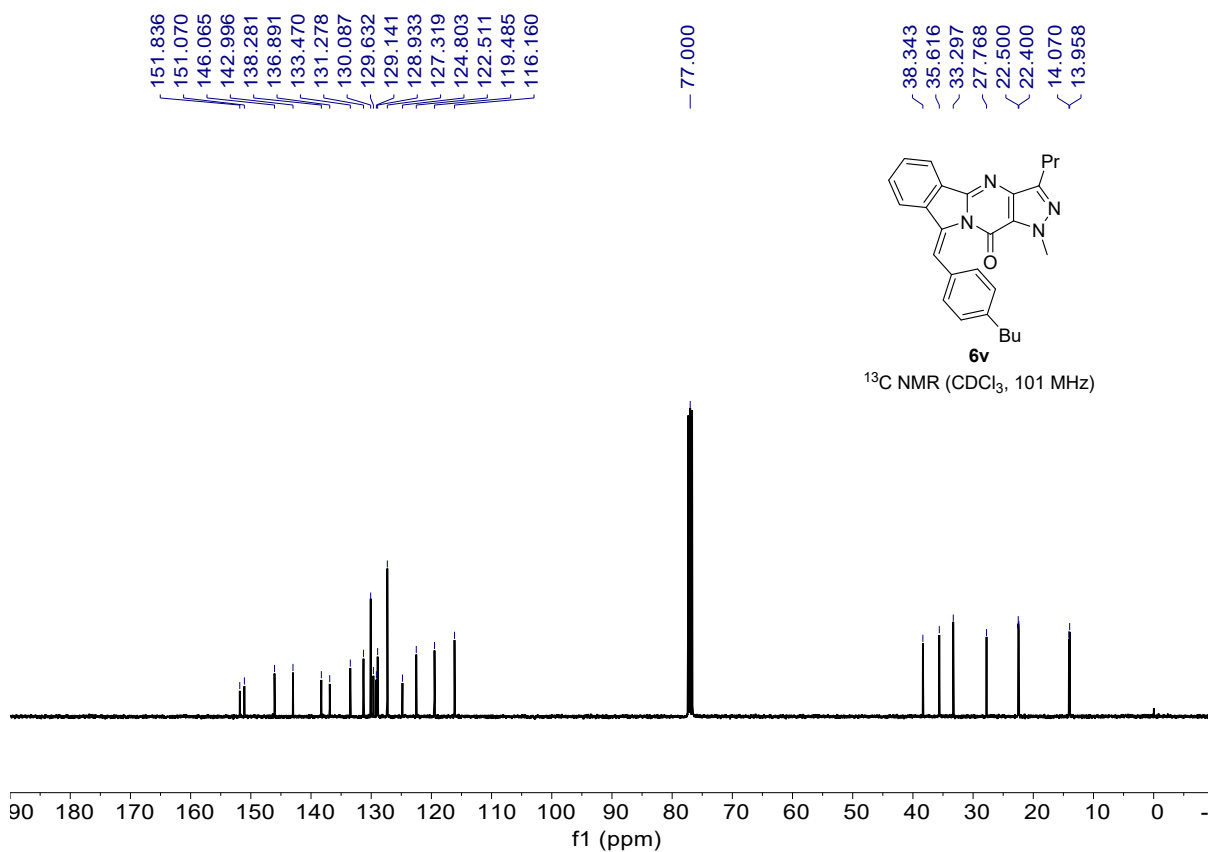

**(Z)-1-methyl-9-(4-pentylbenzylidene)-3-propyl-1,9-dihydro-11H-pyrazolo[4',3':4,5]pyrimido[2,1-a]isoindol-11-one (6w)**

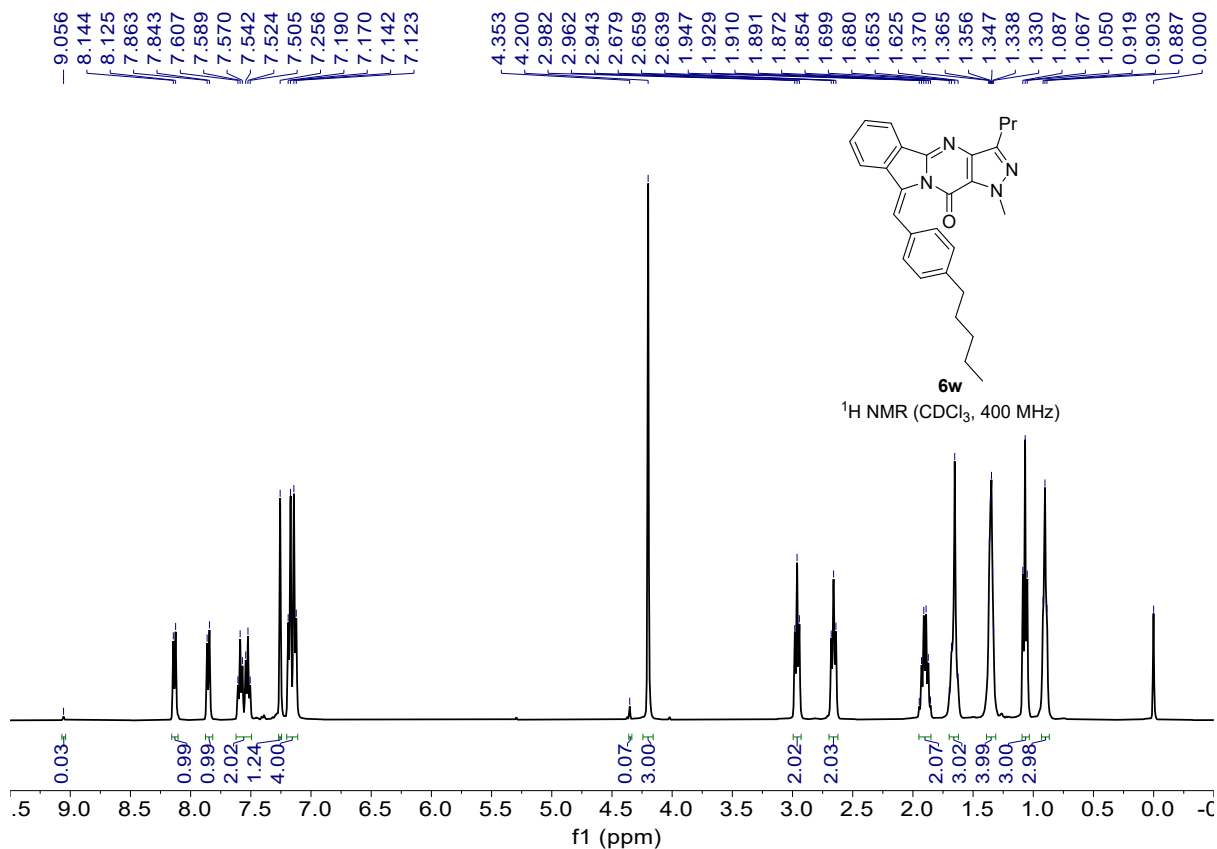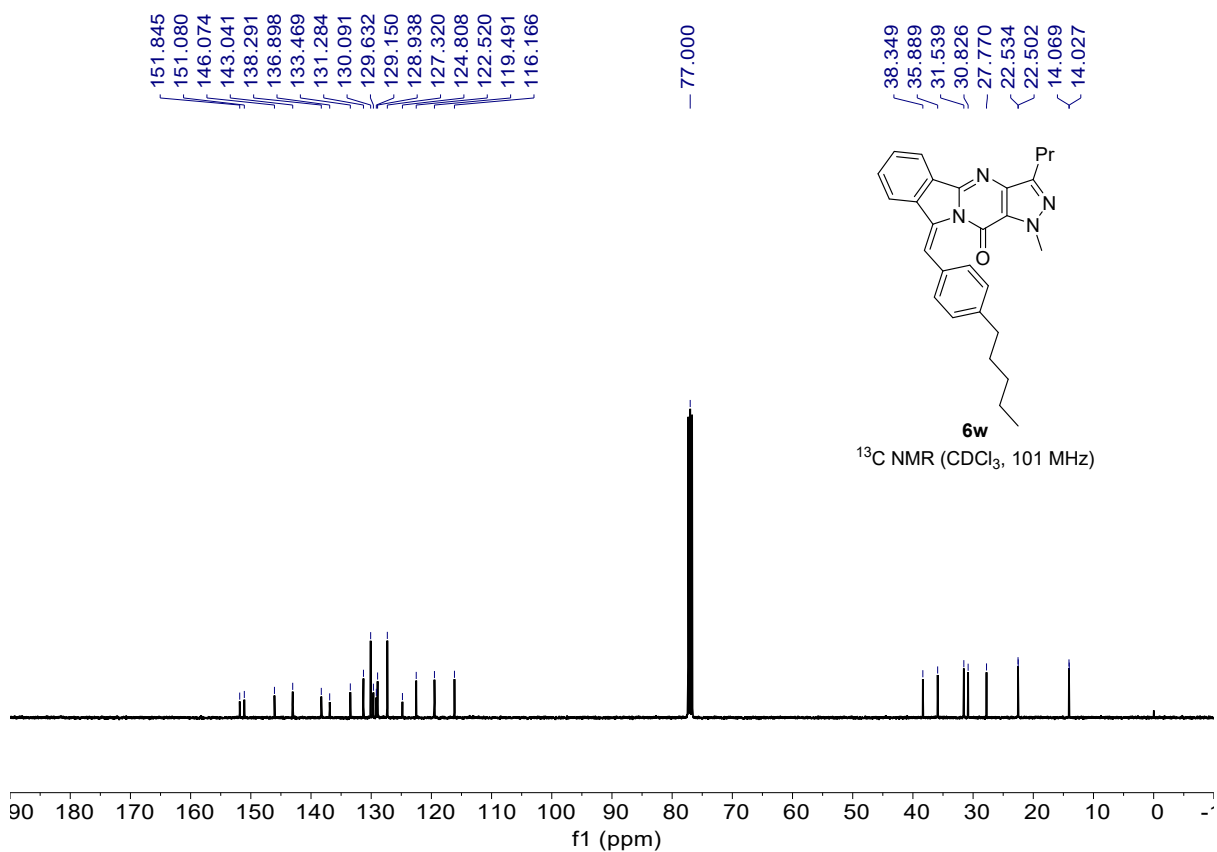

**(Z)-9-(2-fluorobenzylidene)-1-methyl-3-propyl-1,9-dihydro-11H-pyrazolo[4',3':4,5]pyrimido[2,1-a]isoindol-11-one (6x)**

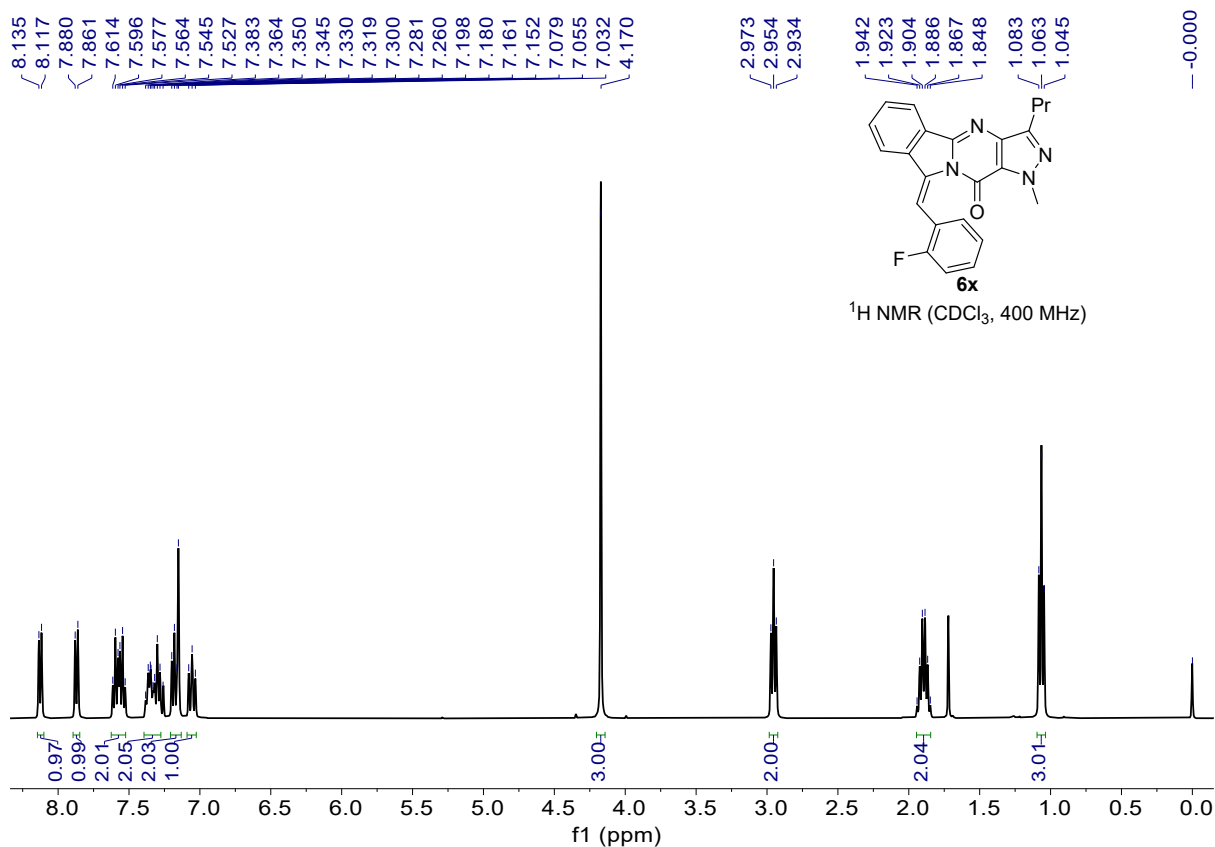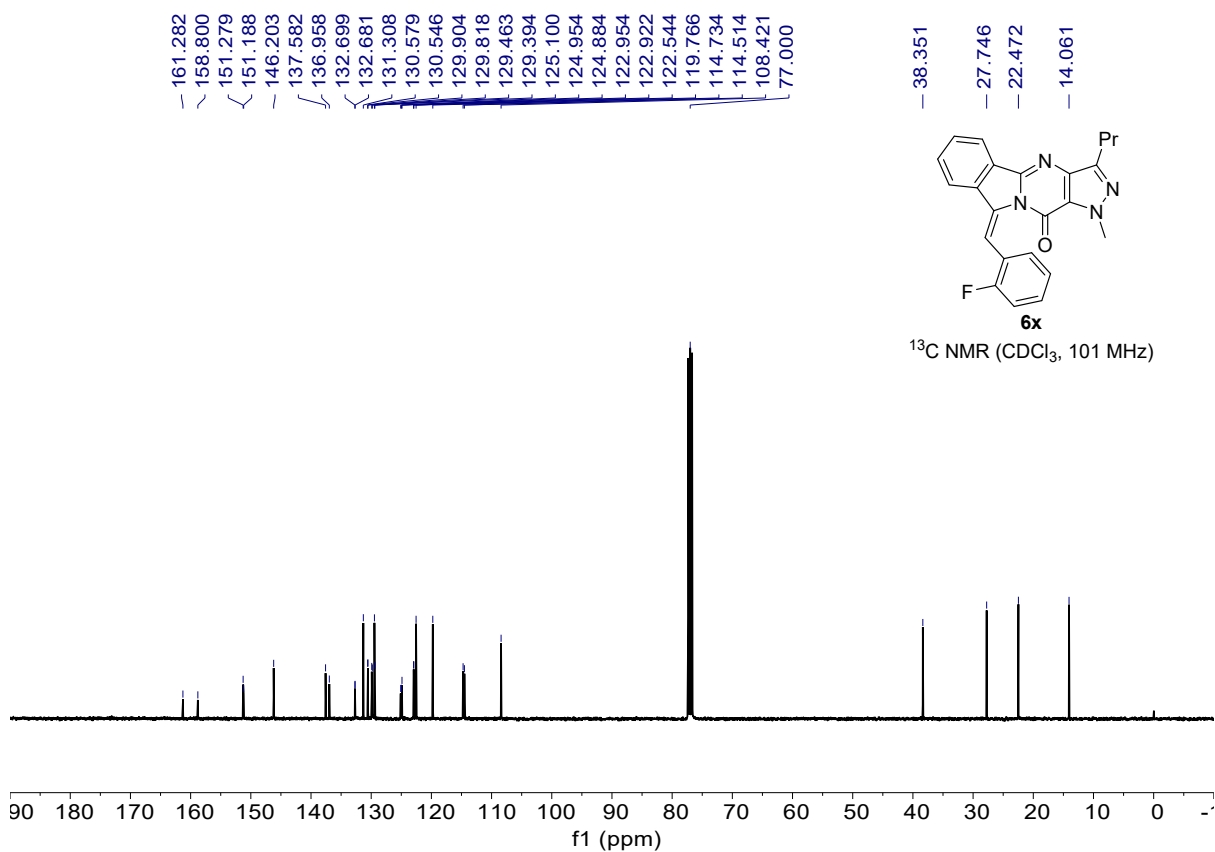

**(Z)-9-(2-chlorobenzylidene)-1-methyl-3-propyl-1,9-dihydro-11H-pyrazolo[4',3':4,5]pyrimido[2,1-a]isoindol-11-one (6y)**

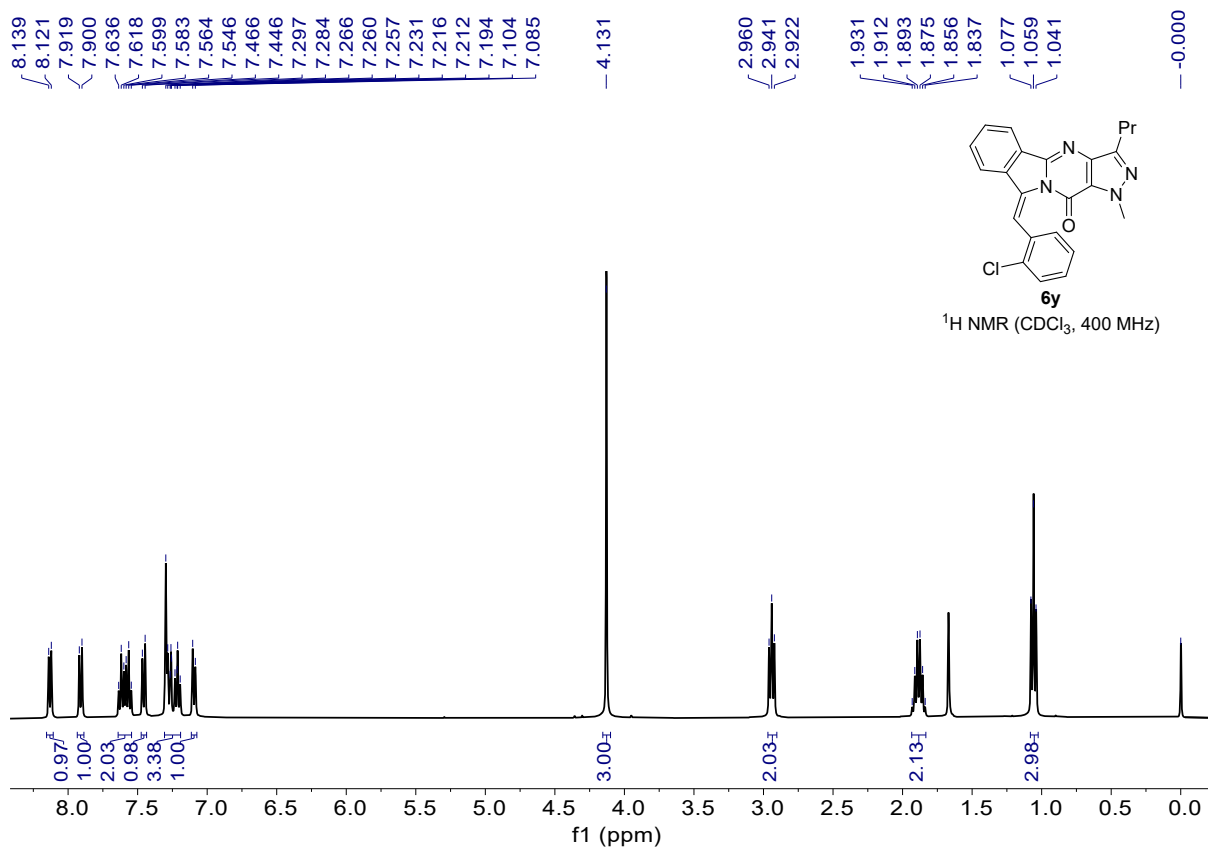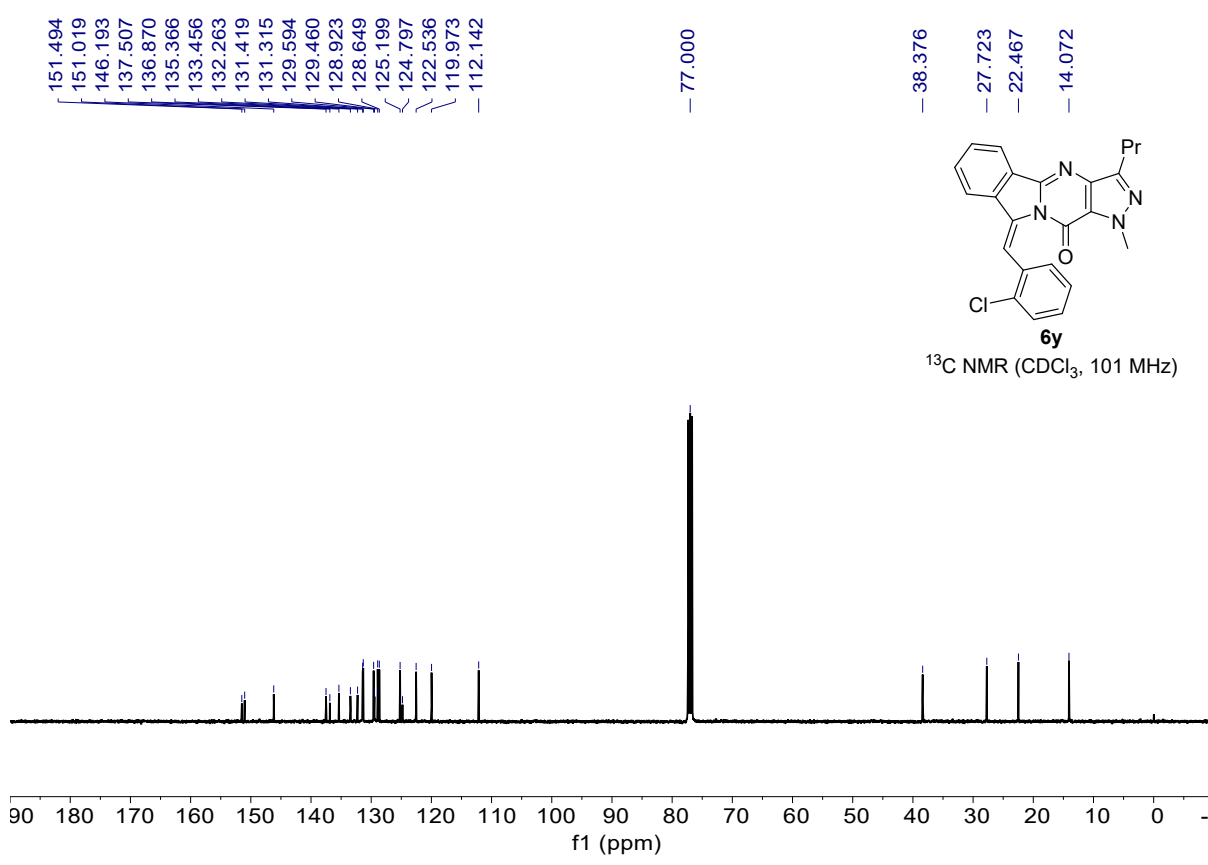

**(Z)-1-methyl-9-(2-methylbenzylidene)-3-propyl-1,9-dihydro-11H-pyrazolo[4',3':4,5]pyrimido[2,1-a]isoindol-11-one (6z)**

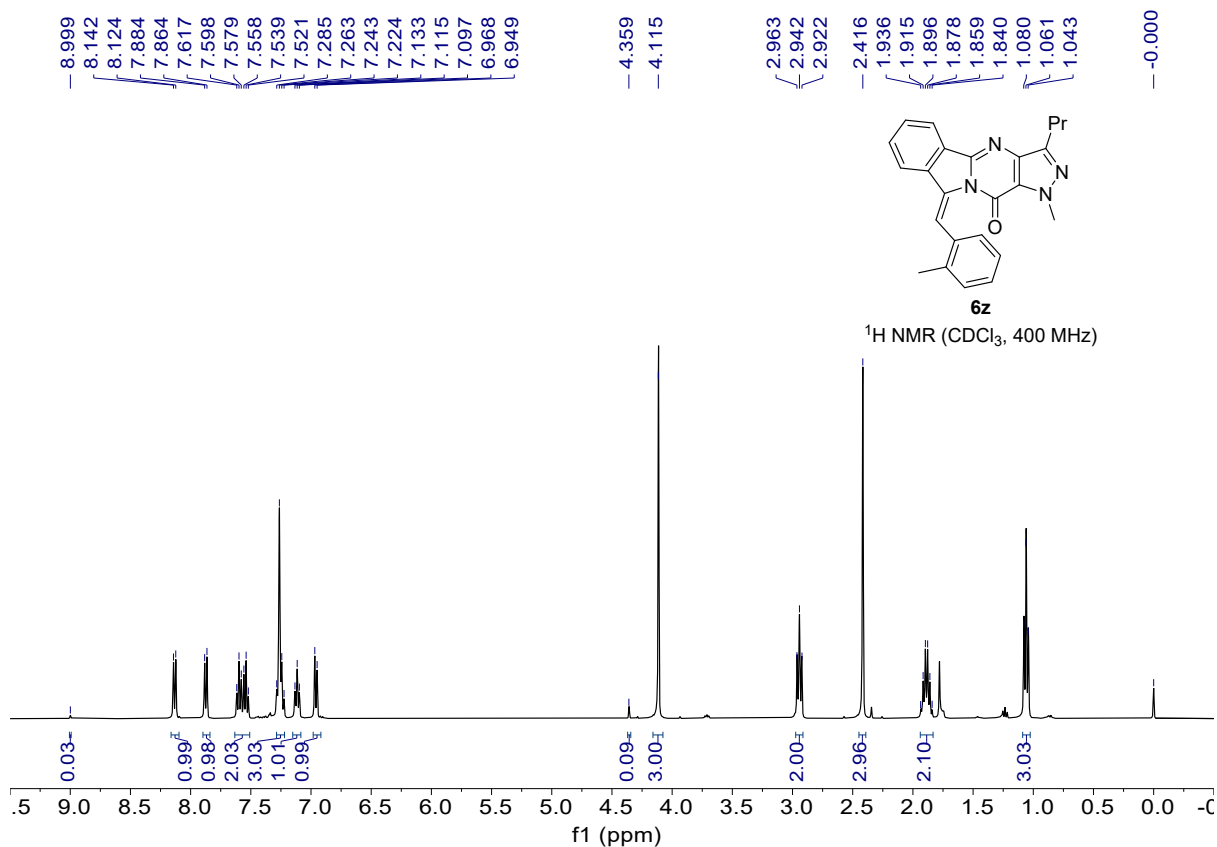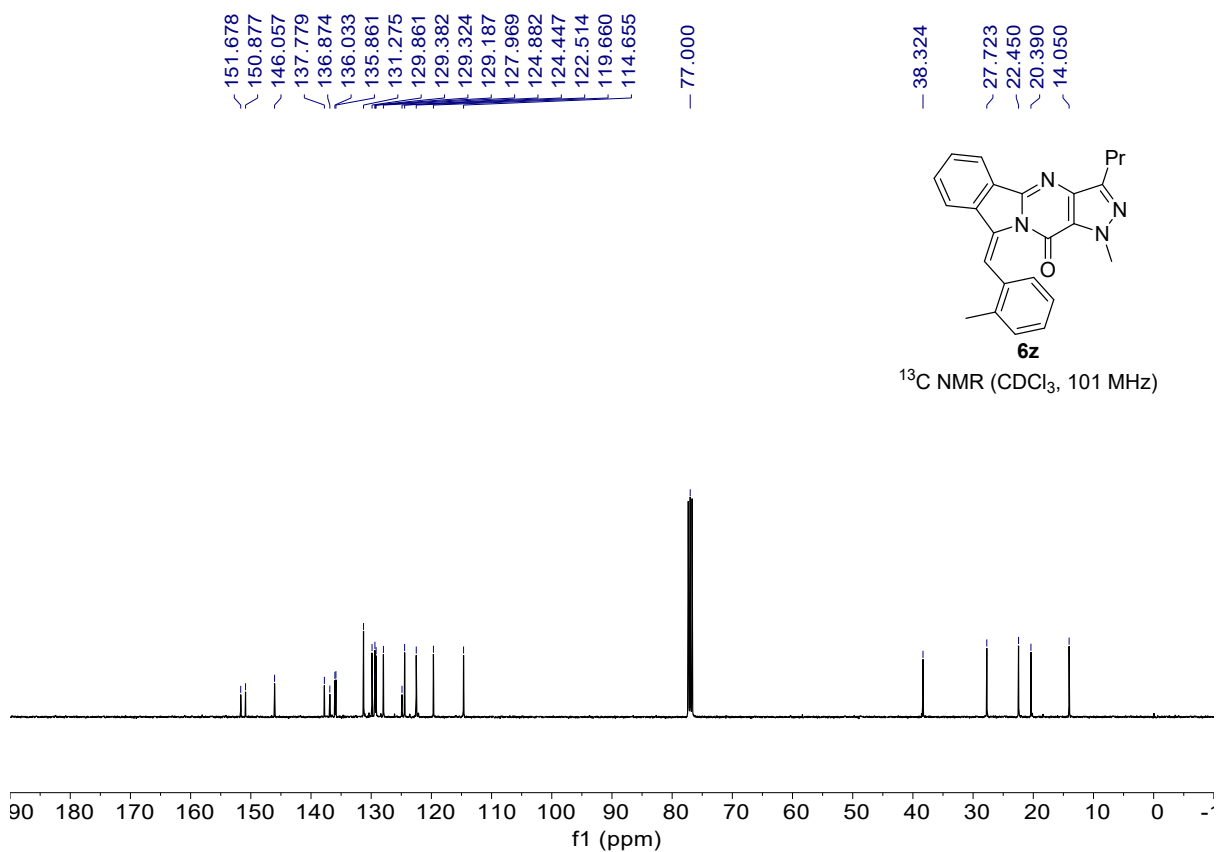

**(Z)-9-(2-methoxybenzylidene)-1-methyl-3-propyl-1,9-dihydro-11H-pyrazolo[4',3':4,5]pyrimido[2,1-a]isoindol-11-one (6aa)**

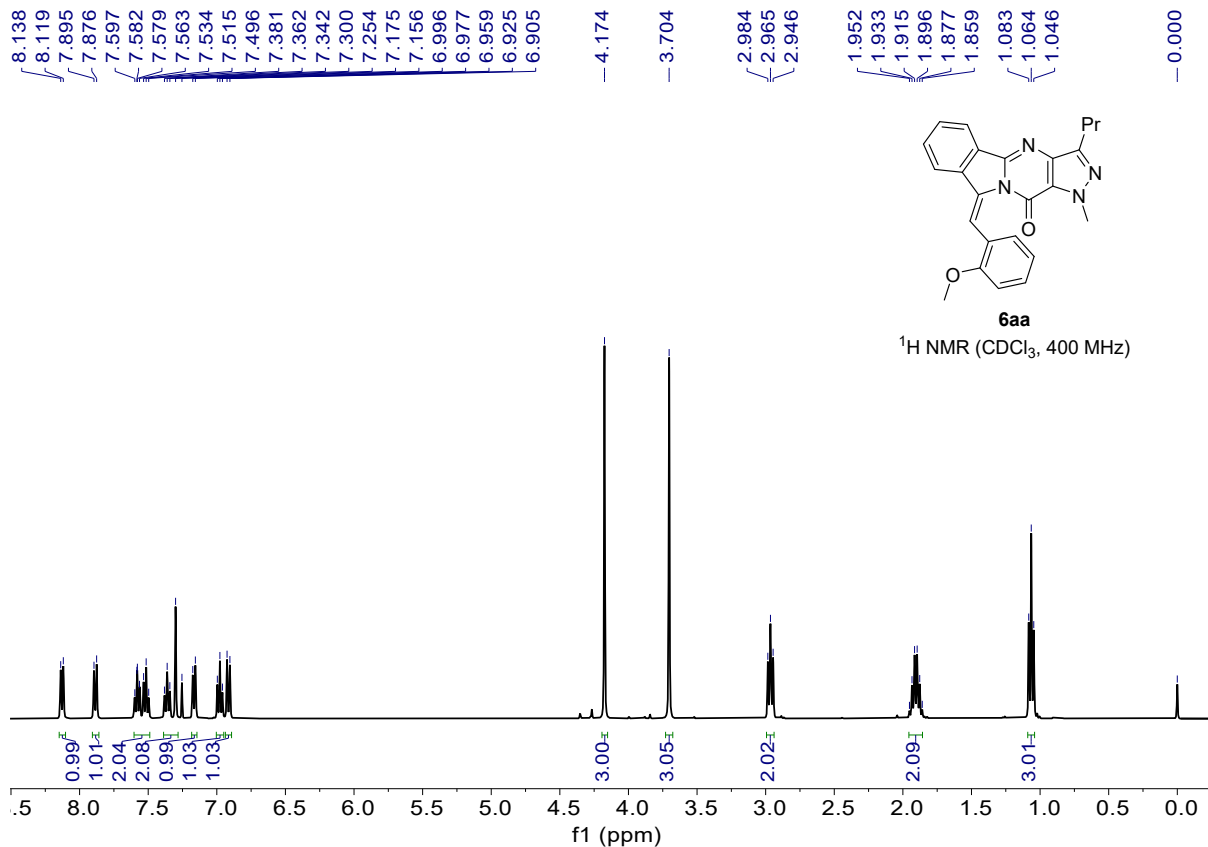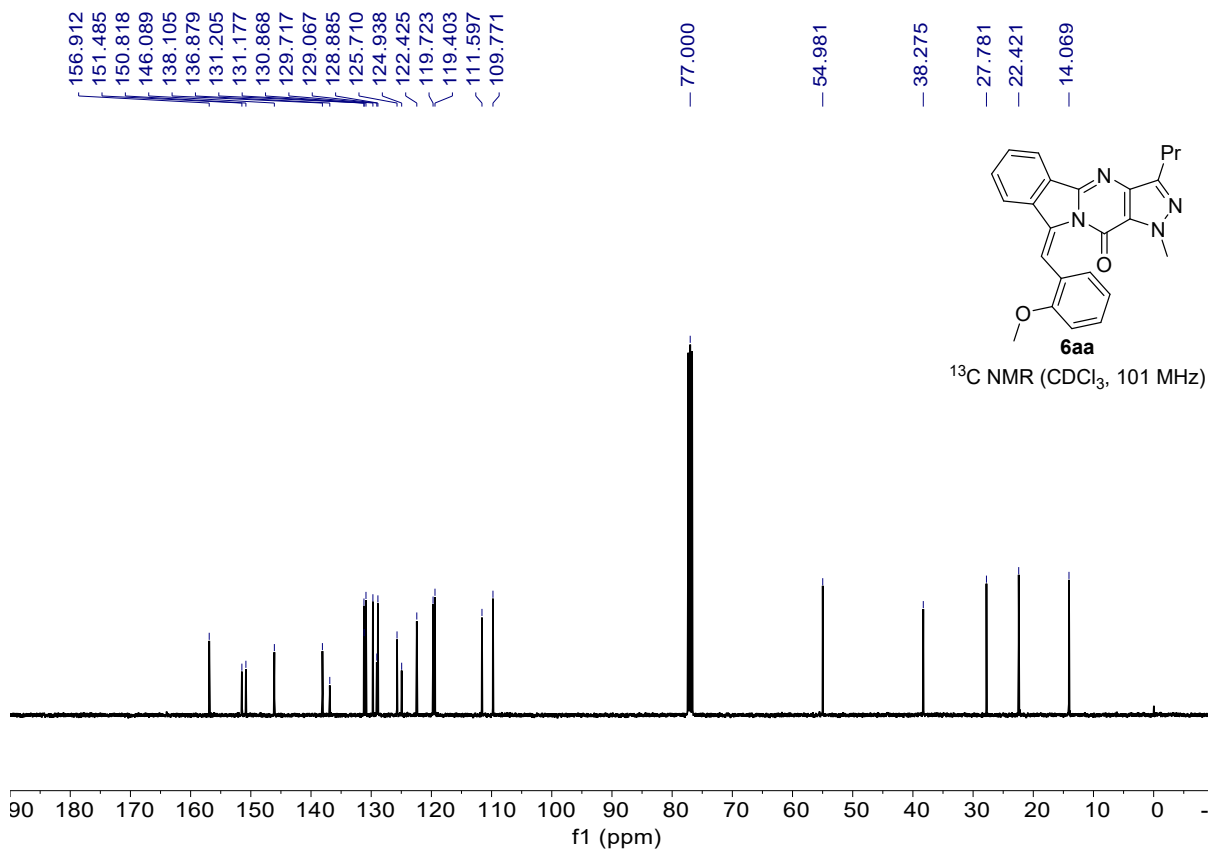

**(Z)-9-(3-fluorobenzylidene)-1-methyl-3-propyl-1,9-dihydro-11H-pyrazolo[4',3':4,5]pyrimido[2,1-a]isoindol-11-one (6ab)**

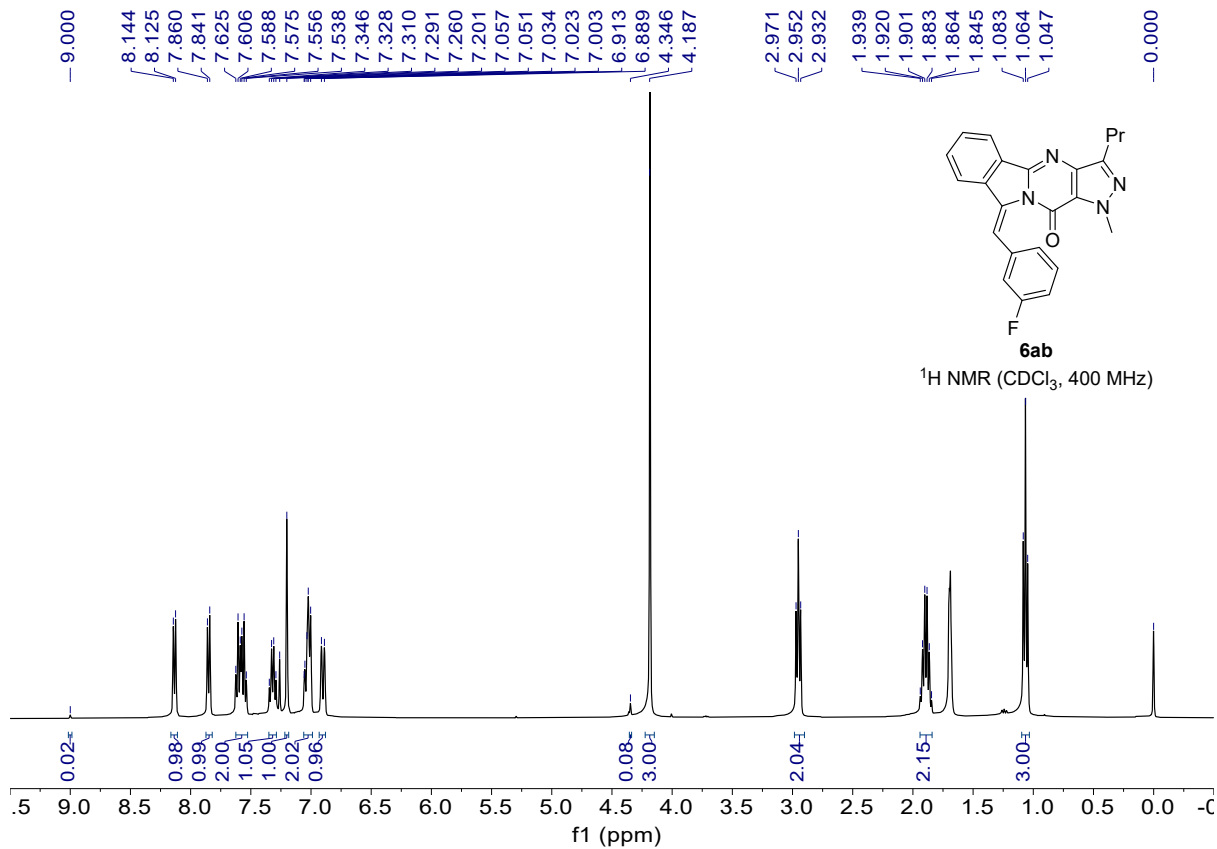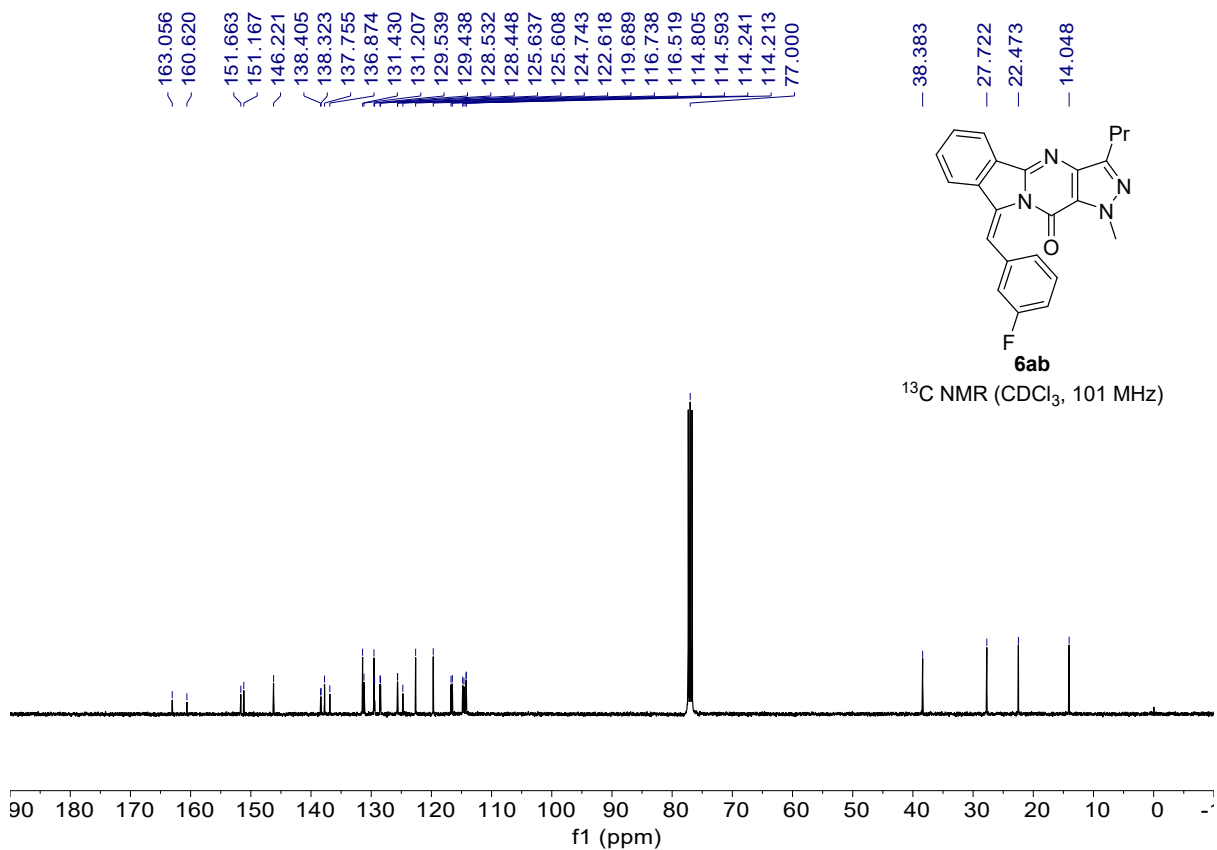

**(Z)-9-(3-chlorobenzylidene)-1-methyl-3-propyl-1,9-dihydro-11H-pyrazolo[4',3':4,5]pyrimido[2,1-a]isoindol-11-one (6ac)**

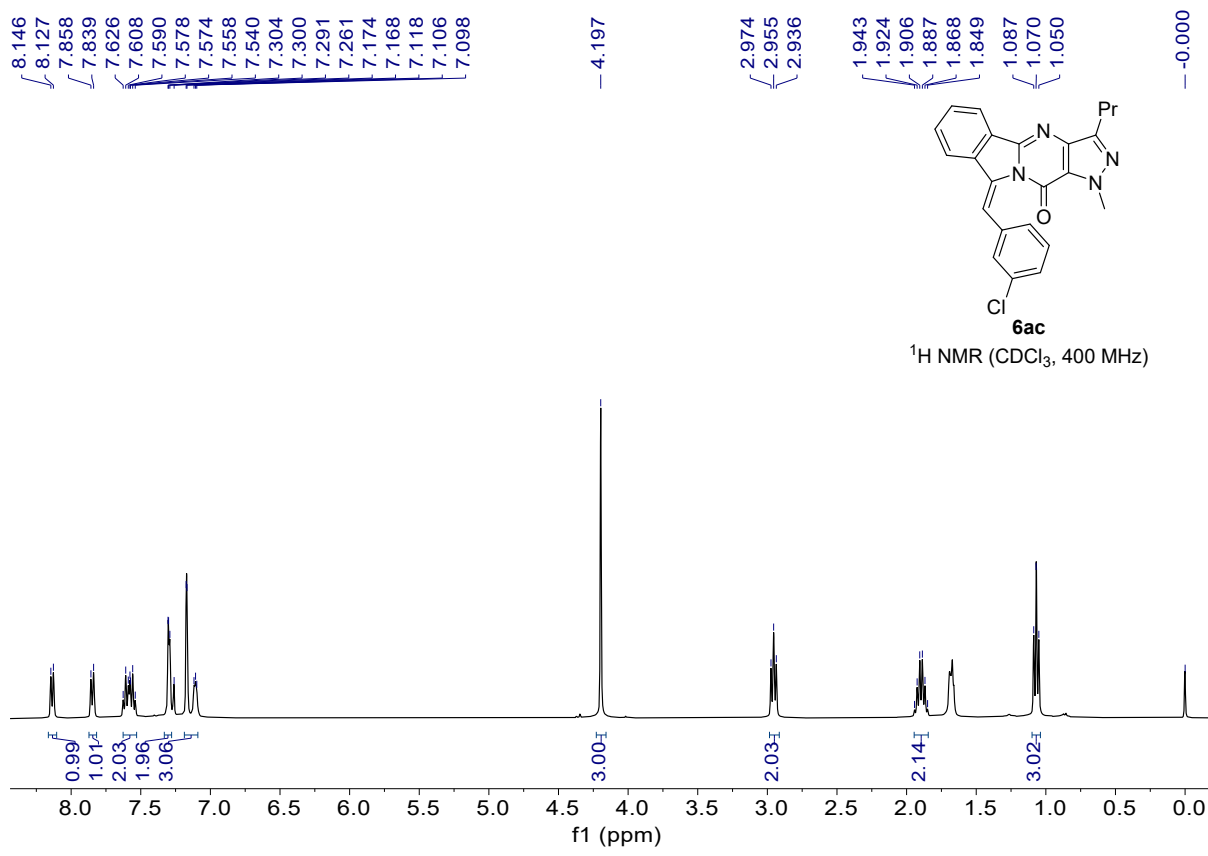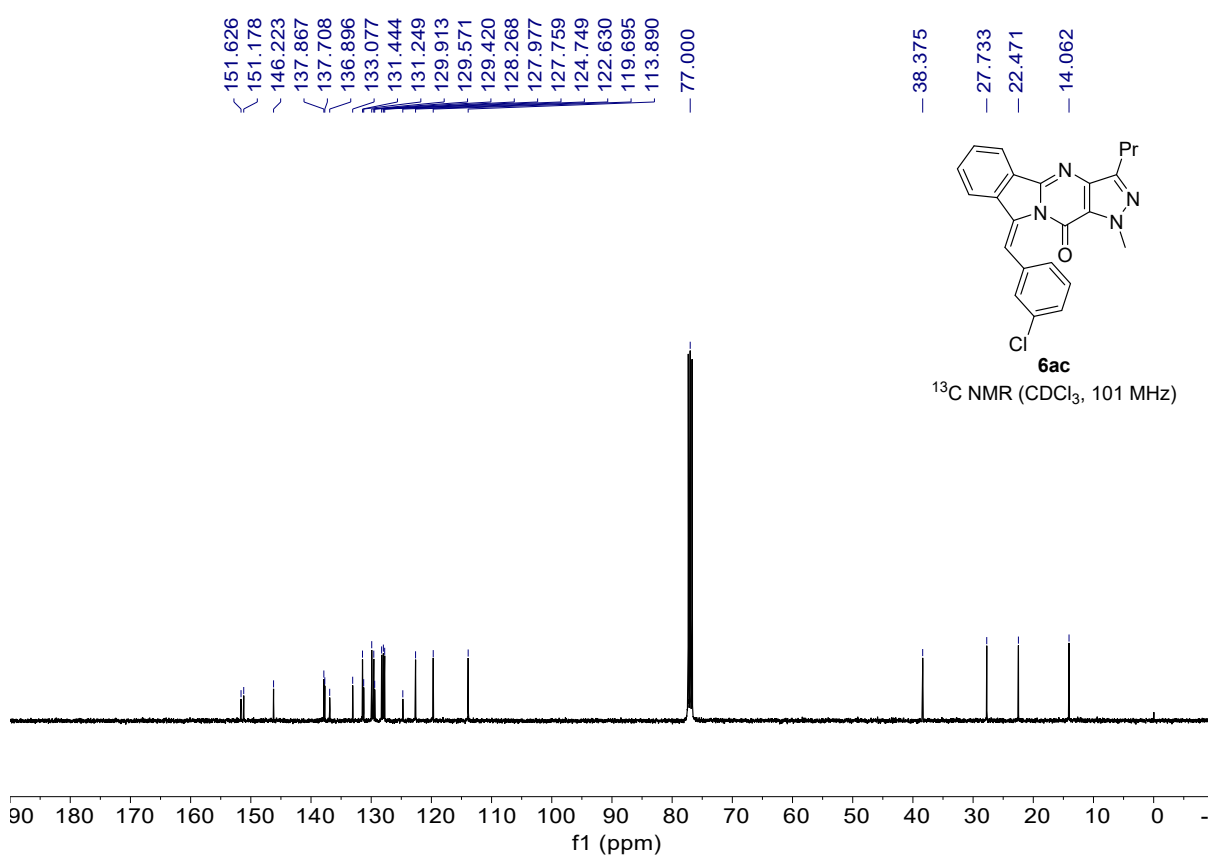



**(Z)-1-methyl-9-(3-methylbenzylidene)-3-propyl-1,9-dihydro-11H-pyrazolo[4',3':4,5]pyrimido[2,1-a]isoindol-11-one (6ad)**

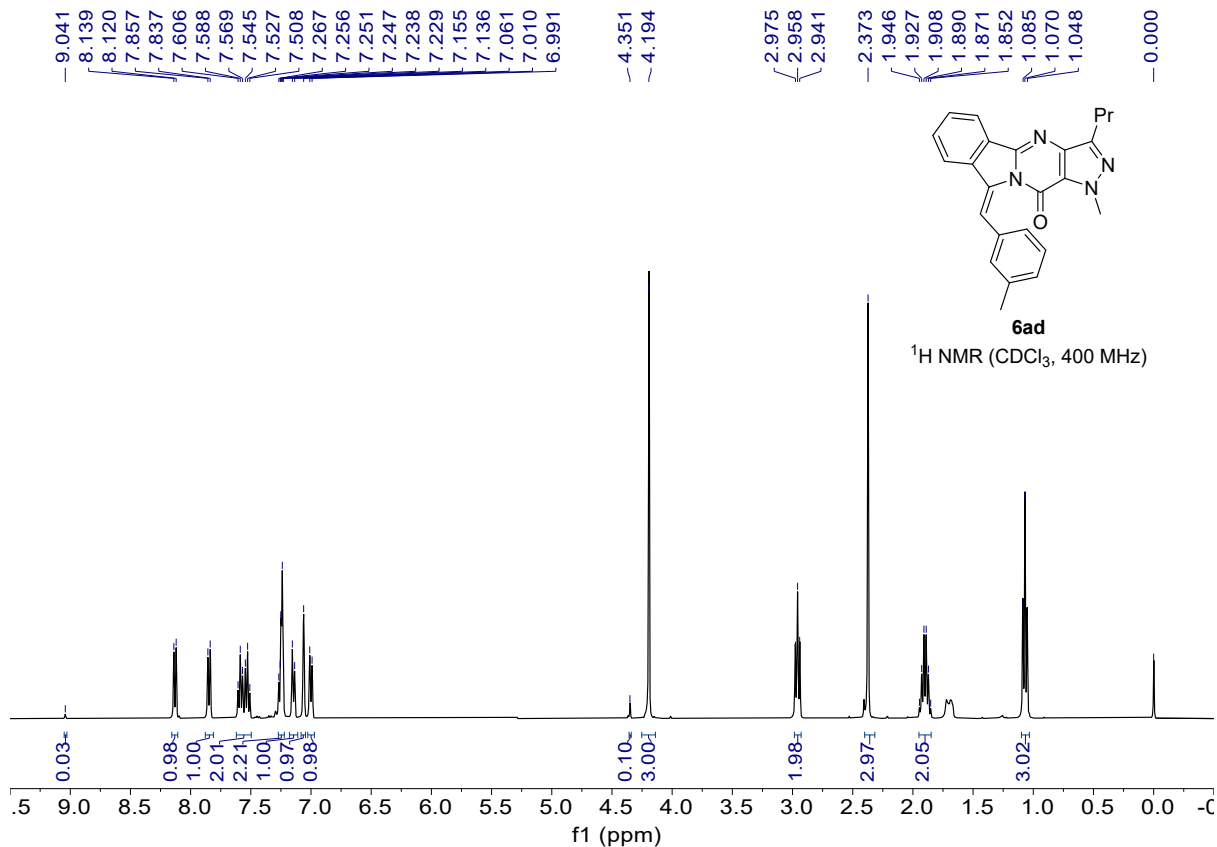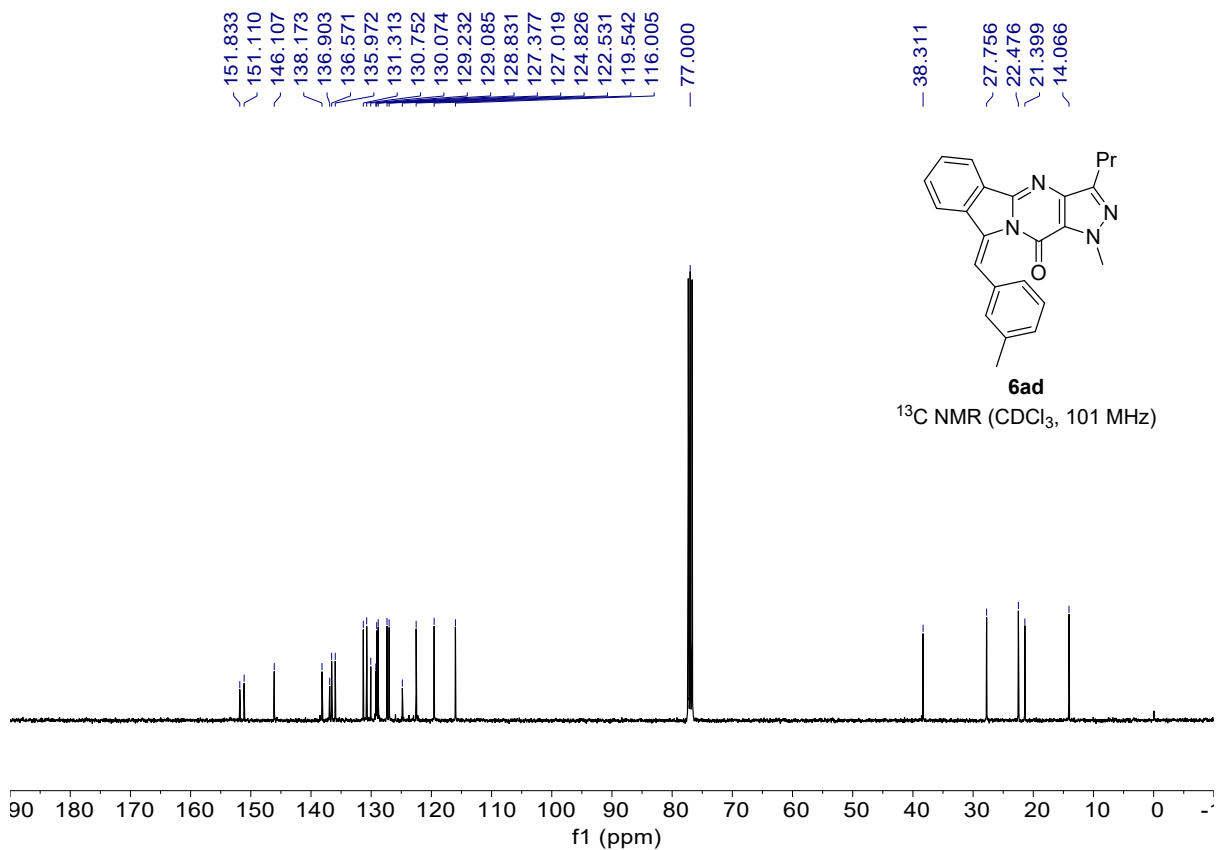

**(Z)-9-(3-methoxybenzylidene)-1-methyl-3-propyl-1,9-dihydro-11H-pyrazolo[4',3':4,5]pyrimido[2,1-a]isoindol-11-one (6ae)**

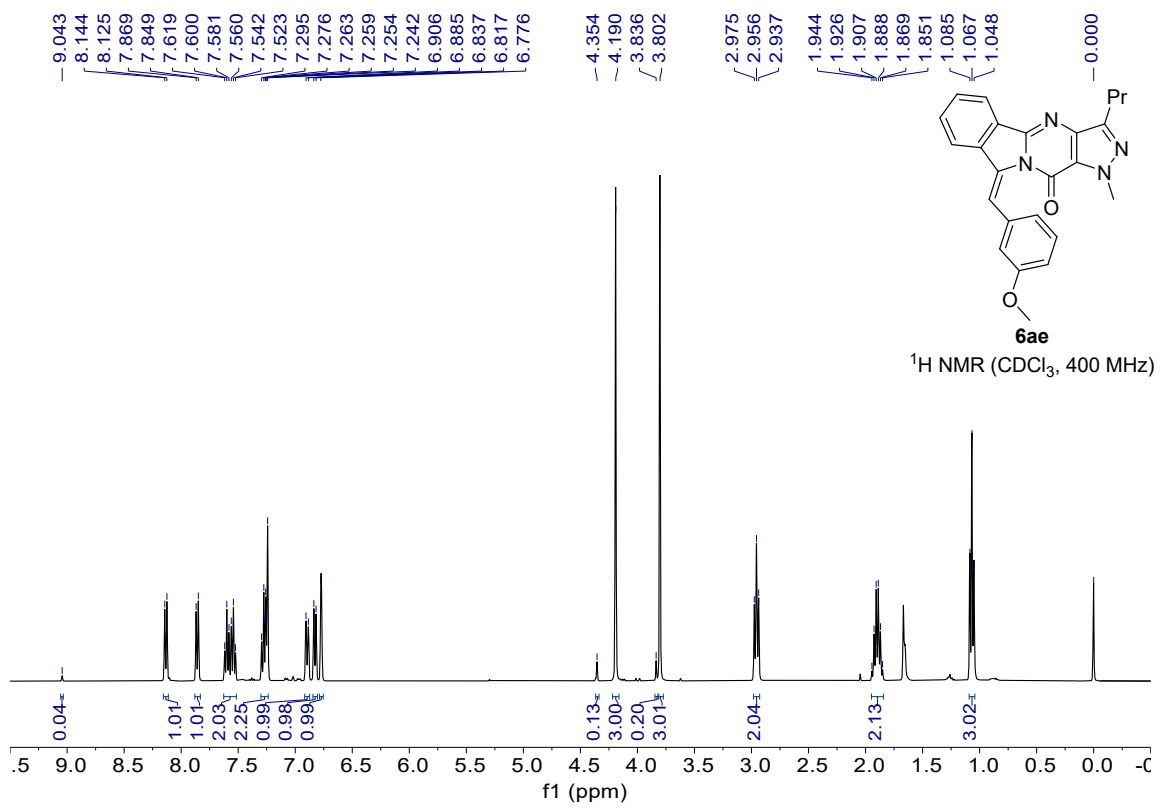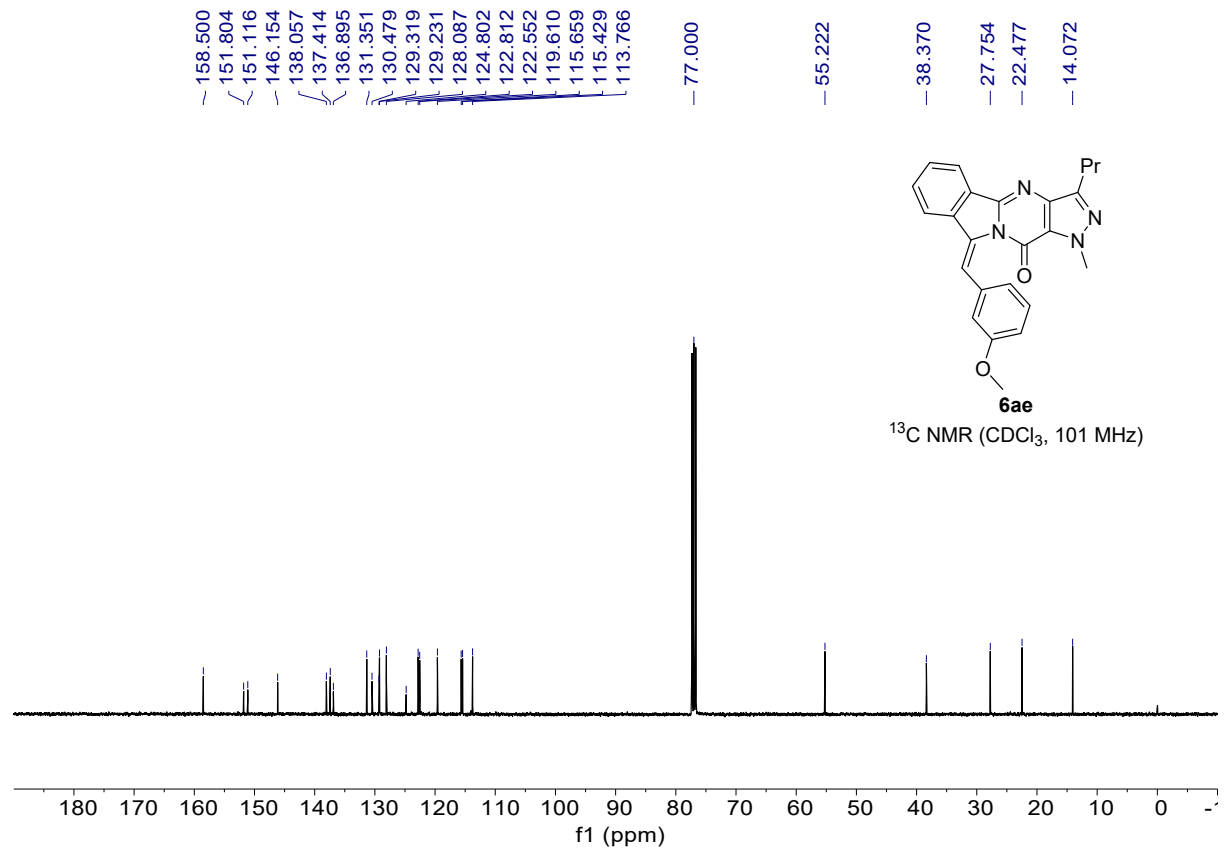

# 2,2'-di(1*H*-perimidin-2-yl)-1,1'-biphenyl (3')

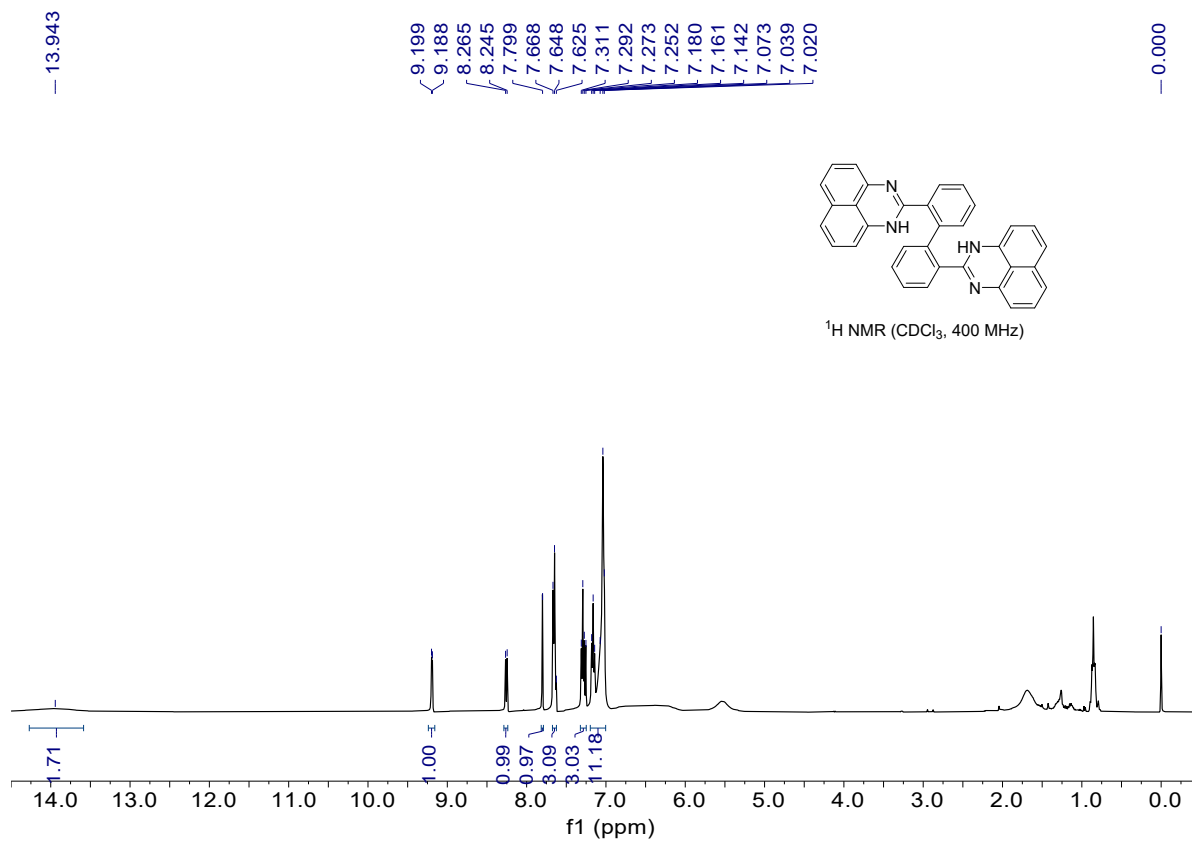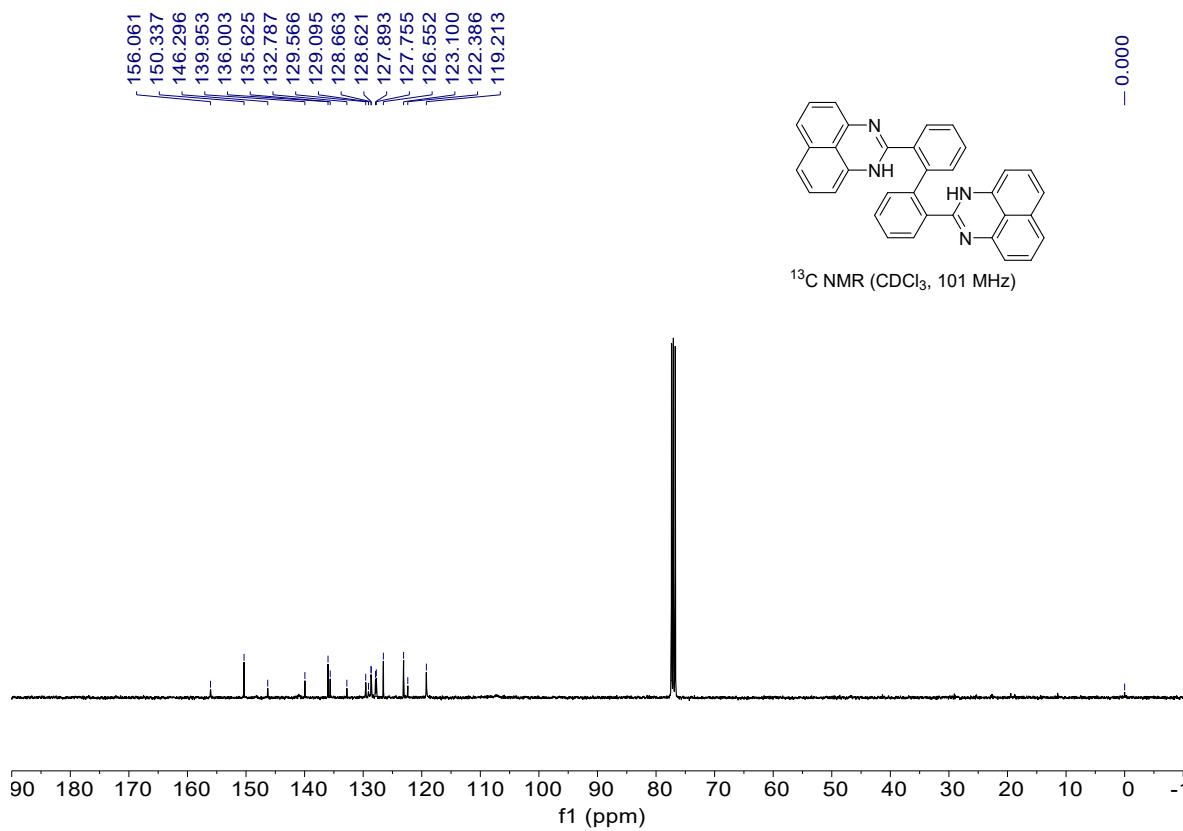

## V. References

1. (a) G. M. Sheldrick, SHELXS-97, Program for Solution of Crystal Structures, University of Gottingen, Germany, 1997. (b) G. M. Sheldrick, SHELXL-97, Program for Refinement of Crystal Structures, University of Gottingen, Germany, 1997.
2. M.-Q. Huang, J.-Q. Liu, X.-S. Wang, J. Heterocyclic Chem. 2019, **56**, 663-669.
3. K. M. Khan, G. M. Maharvi, M. I. Choudhary, A.-u. Rahman, S. Perveen, J. Heterocyclic Chem. 2005, **42**, 1085-1093.
4. F. Sachs, *Justus Liebigs Annalen der Chemie*, 1909, **365**, 53-134.
